# Supplementary material for: An Early SARS-CoV-2 Omicron Outbreak in a Dormitory in Saint Petersburg, Russia
Source: MDPI journal article supplement (doi:10.3390/v15071415), 2023-06-22
Supplement: s1 [file s1]

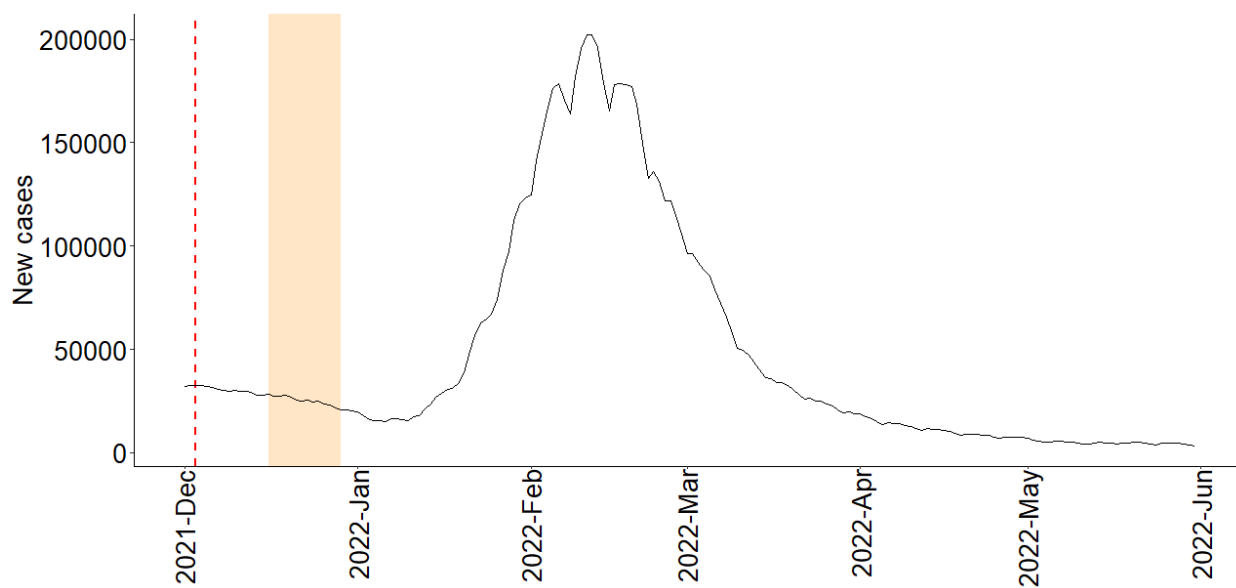

**Figure S1. The daily dynamic of new cases in Russia from December 2021 to June 2022.** Yellow background indicates the period of sampling in the dormitory. Dashed red line marks the time of first detection of Omicron in Russia.

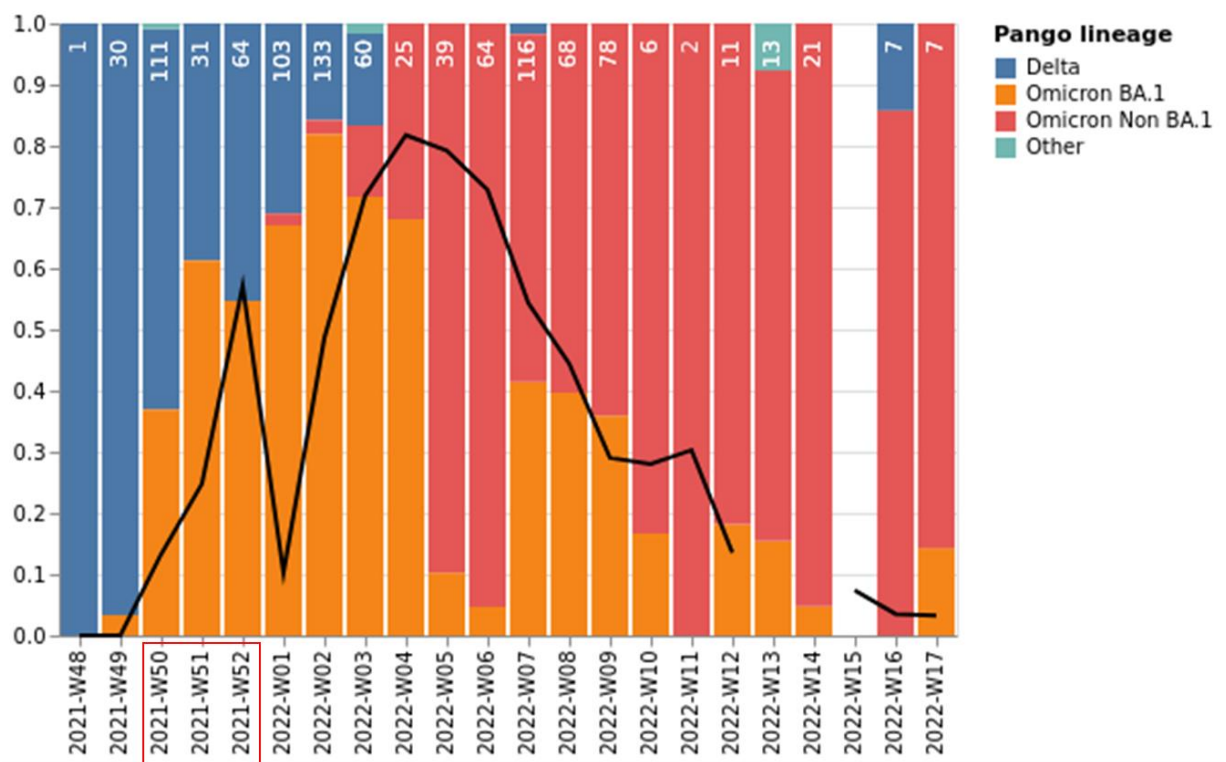

**Figure S2. The fraction of Omicron among screened by PCR or among sequenced samples in Saint-Petersburg from the end of November 2021 to the end of April 2022.** The numbers above the columns are the number of sequenced genomes. Colors of columns are fractions of PANGO lineages in sequenced samples. The black line is the fraction of BA.1 line according to PCR data on ins214EPE. Red rectangle marks the time of sampling of the dormitory outbreak. Dormitory samples are excluded from the plot.

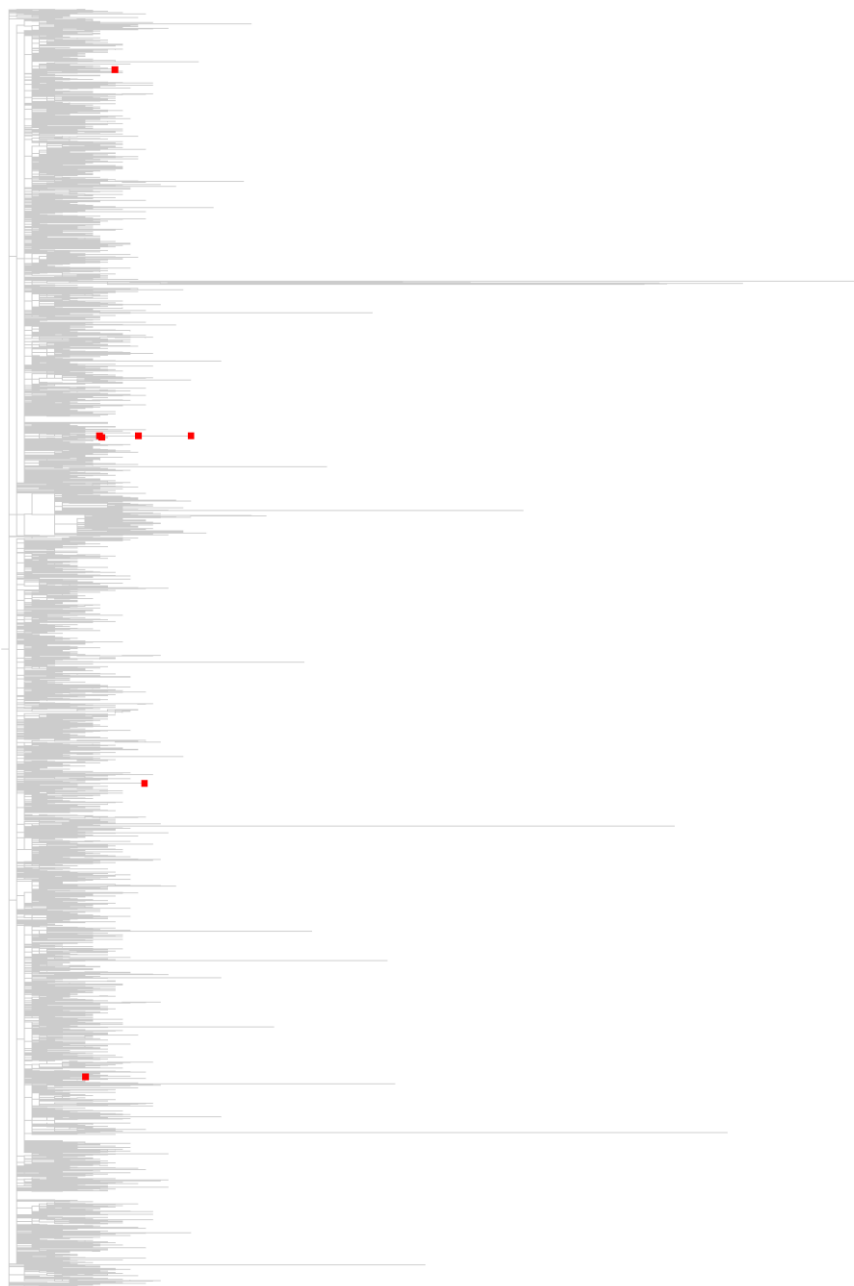

**Figure S3. Dormitory samples (red) on the UShER phylogenetic tree of AY.122 obtained on 21-01-2022.** All Russian samples and 1% of Non-Russian samples are shown.

**Supplementary Table S1. Phylodynamic parameters for the dormitory outbreak inferred for three values of clock rate under birth-death skyline model.**

|            |                                         |                                          |                                        |
|------------|-----------------------------------------|------------------------------------------|----------------------------------------|
| Clock rate | 7.25E-4<br>[6.29E-4, 8.19E-4]           | 9.16E-4<br>[8.20E-4, 1.01E-3]            | 11.1E-4<br>[10.16E-4, 12.09E-4]        |
| Likelihood | -40833.24                               | -40835.25                                | -40836.99                              |
| Prior      | 782.24                                  | 798.83                                   | 811.07                                 |
| TMRCA      | 1 December<br>[22 November, 9 December] | 4 December<br>[26 November, 11 December] | 6 December<br>[1 December 11 December] |
| Re1        | 3.79<br>[2.22, 5.67]                    | 4.47<br>[2.48, 6.85]                     | 5.08<br>[2.77, 7.86]                   |
| Re2        | 1.67<br>[0.99, 2.39]                    | 1.80<br>[1.10, 2.55]                     | 1.94<br>[1.20, 2.72]                   |
| Re3        | 2.61<br>[0.66, 5.18]                    | 2.61<br>[0.65, 5.17]                     | 2.61<br>[0.64, 5.14]                   |
| Sp1        | 0                                       | 0                                        | 0                                      |
| Sp2        | 0.90<br>[0.71, 1]                       | 0.91<br>[0.75, 1]                        | 0.92<br>[0.78, 1]                      |
| Sp3        | 0                                       | 0                                        | 0                                      |
| Sp4        | 0.27<br>[0.02, 0.60]                    | 0.27<br>[0.01, 0.58]                     | 0.26<br>[0.01, 0.58]                   |

**Supplementary Table S2. Fraction of descendants of dormitory clade among all Russian BA.1.1 samples obtained after 16th December 2021 that were present on the phylogenetic tree provided by USHER on 25th May 2022. \*95% Wilson CI**

| Region | All Samples | Dorm-derived | Dorm-derived | Lower Bound | Upper Bound |
|--------|-------------|--------------|--------------|-------------|-------------|
|--------|-------------|--------------|--------------|-------------|-------------|

|     |     | Samples | Fraction |      |      |
|-----|-----|---------|----------|------|------|
| LEN | 4   | 2       | 0.5      | 0.15 | 0.85 |
| SPE | 100 | 41      | 0.41     | 0.32 | 0.51 |
| LIP | 39  | 5       | 0.13     | 0.06 | 0.27 |
| KLU | 36  | 3       | 0.08     | 0.03 | 0.22 |
| SAR | 33  | 2       | 0.06     | 0.02 | 0.2  |
| RYA | 19  | 1       | 0.05     | 0    | 0.25 |
| SMO | 30  | 1       | 0.03     | 0    | 0.17 |
| IVA | 18  | 0       | 0        | 0    | 0.18 |
| TUL | 21  | 0       | 0        | 0    | 0.15 |
| YAN | 3   | 0       | 0        | 0    | 0.56 |
| MOW | 81  | 0       | 0        | 0    | 0.05 |
| MO  | 4   | 0       | 0        | 0    | 0.49 |
| PRI | 33  | 0       | 0        | 0    | 0.1  |
| ME  | 4   | 0       | 0        | 0    | 0.49 |
| KL  | 18  | 0       | 0        | 0    | 0.18 |
| TVE | 15  | 0       | 0        | 0    | 0.2  |
| MAG | 7   | 0       | 0        | 0    | 0.35 |
| VLA | 2   | 0       | 0        | 0    | 0.66 |
| KAM | 1   | 0       | 0        | 0    | 0.95 |
| ULY | 13  | 0       | 0        | 0    | 0.23 |
| KB  | 3   | 0       | 0        | 0    | 0.56 |
| OMS | 6   | 0       | 0        | 0    | 0.39 |
| KDA | 1   | 0       | 0        | 0    | 0.95 |
| MUR | 1   | 0       | 0        | 0    | 0.95 |

**Supplementary Table S3. Fraction of descendants of dormitory clade among all non-russian BA.1.1 samples obtained after 16th December 2021. Only countries with non-zero fraction are shown.\*95% Wilson CI**

| Country     | All Samples | Dorm-derived Samples | Dorm-derived Fraction | Lower Bound | Upper Bound |
|-------------|-------------|----------------------|-----------------------|-------------|-------------|
| Estonia     | 328         | 6                    | 0.018                 | 0.01        | 0.04        |
| Finland     | 2340        | 11                   | 0.005                 | 0           | 0.01        |
| Austria     | 1358        | 2                    | 0.001                 | 0           | 0.01        |
| Israel      | 7087        | 10                   | 0.001                 | 0           | 0           |
| Argentina   | 729         | 1                    | 0.001                 | 0           | 0.01        |
| Denmark     | 2964        | 4                    | 0.001                 | 0           | 0           |
| Germany     | 37666       | 40                   | 0.001                 | 0           | 0           |
| France      | 10414       | 8                    | 0.0008                | 0           | 0           |
| Slovakia    | 2760        | 2                    | 0.0007                | 0           | 0           |
| Norway      | 1390        | 1                    | 0.0007                | 0           | 0           |
| India       | 1517        | 1                    | 0.0007                | 0           | 0           |
| Switzerland | 4900        | 2                    | 0.0004                | 0           | 0           |
| Slovenia    | 6263        | 2                    | 0.0003                | 0           | 0           |
| Italy       | 3170        | 1                    | 0.0003                | 0           | 0           |
| Netherlands | 4448        | 1                    | 0.0002                | 0           | 0           |
| Japan       | 9015        | 2                    | 0.0002                | 0           | 0           |
| Belgium     | 4707        | 1                    | 0.0002                | 0           | 0           |
| England     | 96314       | 18                   | 0.0002                | 0           | 0           |
| Scotland    | 21704       | 4                    | 0.0002                | 0           | 0           |
| USA         | 271041      | 1                    | 0.000007              | 0           | 0           |
