# Supplementary material for: An Early SARS-CoV-2 Omicron Outbreak in a Dormitory in Saint Petersburg, Russia
Source: Viruses. 2023 Jun 22;15(7):1415. doi: 10.3390/v15071415 (PMC10385080; doi:10.3390/v15071415)
Supplement: Supplementary file 1 [file viruses-15-01415-s001.zip › Supplementary File S1.tsv]

We gratefully acknowledge both the originating and submitting laboratories for the sequence data in GISAID EpiCoV on which the SARS-CoV-2 variants data are partially based.
Algeria/16383/2022	EPI_ISL_11437937	2022-02-20	NIC, Viral Respiratory Unit	Virology Departement	Zahida Mehdi et al
Algeria/16509/2022	EPI_ISL_11437939	2022-02-21	NIC, Viral Respiratory Unit	Virology Departement	Zahida Mehdi et al
Algeria/16580/2022	EPI_ISL_12042772	2022-02-21	NIC, Viral Respiratory Unit	Virology Departement	Fayez Khardine et al
Algeria/98101/2021	EPI_ISL_10969510	2021-12-21	NIC, Viral Respiratory Unit	Virology Departement	Baya Hedjal et al
Andorra/AND-251_220261273601_COV-GC/2022	EPI_ISL_10122617	2022-01-20	Laboratori d'anàlisis clíniques, Hospital Nostra Senyora de Meritxell	LBM de CHU de Toulouse, Hôpitaux de Toulouse	Rendon M et al
Andorra/AND-251_220541273201_COV-GC/2022	EPI_ISL_11450495	2022-02-16	Laboratori d'anàlisis clíniques, Hospital Nostra Senyora de Meritxell	LBM de CHU de Toulouse, Hôpitaux de Toulouse	Rendon M et al
Andorra/AND-253_220121370701_COV-GC/2022	EPI_ISL_9458607	2022-01-05	Laboratori d'anàlisis clíniques, Hospital Nostra Senyora de Meritxell	LBM de CHU de Toulouse, Hôpitaux de Toulouse	Rendon M et al
Andorra/AND-253_220261269601_COV-GC/2022	EPI_ISL_10122614	2022-01-19	Laboratori d'anàlisis clíniques, Hospital Nostra Senyora de Meritxell	LBM de CHU de Toulouse, Hôpitaux de Toulouse	Rendon M et al
Andorra/AND-253_220261270801_COV-GC/2022	EPI_ISL_10122615	2022-01-19	Laboratori d'anàlisis clíniques, Hospital Nostra Senyora de Meritxell	LBM de CHU de Toulouse, Hôpitaux de Toulouse	Rendon M et al
Andorra/AND-253_220261272101_COV-GC/2022	EPI_ISL_10122616	2022-01-19	Laboratori d'anàlisis clíniques, Hospital Nostra Senyora de Meritxell	LBM de CHU de Toulouse, Hôpitaux de Toulouse	Rendon M et al
Andorra/AND-253_220331373101_COV-GC/2022	EPI_ISL_10122632	2022-01-27	Laboratori d'anàlisis clíniques, Hospital Nostra Senyora de Meritxell	LBM de CHU de Toulouse, Hôpitaux de Toulouse	Rendon M et al
Andorra/AND-253_220681341601/2022	EPI_ISL_12349796	2022-02-24	Laboratori d'anàlisis clíniques, Hospital Nostra Senyora de Meritxell	LBM de CHU de Toulouse, Hôpitaux de Toulouse	Rendon M et al
Andorra/AND-254_220331360701_COV-GC/2022	EPI_ISL_10122630	2022-01-31	Laboratori d'anàlisis clíniques, Hospital Nostra Senyora de Meritxell	LBM de CHU de Toulouse, Hôpitaux de Toulouse	Rendon M et al
Andorra/AND-254_220541273301_COV-GC/2022	EPI_ISL_11450492	2022-02-16	Laboratori d'anàlisis clíniques, Hospital Nostra Senyora de Meritxell	LBM de CHU de Toulouse, Hôpitaux de Toulouse	Rendon M et al
Andorra/AND-255_220821333001/2022	EPI_ISL_12349806	2022-03-15	Laboratori d'anàlisis clíniques, Hospital Nostra Senyora de Meritxell	LBM de CHU de Toulouse, Hôpitaux de Toulouse	Rendon M et al
Anguilla/127779/2022	EPI_ISL_11998897	2022-02-22	The Caribbean Public Health Agency	Carrington Lab, Department of Preclinical Sciences, Faculty of Medical Sciences, The University of the West Indies, St Augustine Campus	Nikita S. D. Sahadeo et al
Anguilla/127781/2022	EPI_ISL_11998892	2022-02-18	The Caribbean Public Health Agency	Carrington Lab, Department of Preclinical Sciences, Faculty of Medical Sciences, The University of the West Indies, St Augustine Campus	Nikita S. D. Sahadeo et al
Anguilla/127783/2022	EPI_ISL_11998890	2022-02-17	The Caribbean Public Health Agency	Carrington Lab, Department of Preclinical Sciences, Faculty of Medical Sciences, The University of the West Indies, St Augustine Campus	Nikita S. D. Sahadeo et al
Anguilla/127790/2022	EPI_ISL_11998887	2022-02-13	The Caribbean Public Health Agency	Carrington Lab, Department of Preclinical Sciences, Faculty of Medical Sciences, The University of the West Indies, St Augustine Campus	Nikita S. D. Sahadeo et al
Anguilla/127792/2022	EPI_ISL_11998888	2022-02-13	The Caribbean Public Health Agency	Carrington Lab, Department of Preclinical Sciences, Faculty of Medical Sciences, The University of the West Indies, St Augustine Campus	Nikita S. D. Sahadeo et al
Argentina/INEI115079/2021	EPI_ISL_8422327	2021-12-08	Servicio Virosis Respiratorias-Departamento Virología-INEI	Instituto Nacional Enfermedades Infecciosas C.G.Malbran	Baumeister E. et al
Argentina/INEI115080/2021	EPI_ISL_8422328	2021-12-08	Servicio Virosis Respiratorias-Departamento Virología-INEI	Instituto Nacional Enfermedades Infecciosas C.G.Malbran	Baumeister E. et al
Argentina/INEI115729/2021	EPI_ISL_10705348	2021-12-16	Servicio Virosis Respiratorias-Departamento Virología-INEI	Instituto Nacional Enfermedades Infecciosas C.G.Malbran	Baumeister E. et al
Argentina/INEI115824/2021	EPI_ISL_9189398	2021-12-10	Servicio Virosis Respiratorias-Departamento Virología-INEI	Instituto Nacional Enfermedades Infecciosas C.G.Malbran	Baumeister E. et al
Argentina/INEI115862/2021	EPI_ISL_9189302	2021-12-16	Servicio Virosis Respiratorias-Departamento Virología-INEI	Instituto Nacional Enfermedades Infecciosas C.G.Malbran	Baumeister E. et al
Argentina/INEI116104/2021	EPI_ISL_9189324	2021-12-16	Servicio Virosis Respiratorias-Departamento Virología-INEI	Instituto Nacional Enfermedades Infecciosas C.G.Malbran	Baumeister E. et al
Argentina/INEI116107/2021	EPI_ISL_9189325	2021-12-15	Servicio Virosis Respiratorias-Departamento Virología-INEI	Instituto Nacional Enfermedades Infecciosas C.G.Malbran	Baumeister E. et al
Argentina/INEI116138/2021	EPI_ISL_9189328	2021-12-15	Servicio Virosis Respiratorias-Departamento Virología-INEI	Instituto Nacional Enfermedades Infecciosas C.G.Malbran	Baumeister E. et al
Argentina/INEI116150/2021	EPI_ISL_9189329	2021-12-26	Servicio Virosis Respiratorias-Departamento Virología-INEI	Instituto Nacional Enfermedades Infecciosas C.G.Malbran	Baumeister E. et al
Argentina/INEI116155/2021	EPI_ISL_9189332	2021-12-23	Servicio Virosis Respiratorias-Departamento Virología-INEI	Instituto Nacional Enfermedades Infecciosas C.G.Malbran	Baumeister E. et al
Argentina/INEI116156/2021	EPI_ISL_9189333	2021-12-23	Servicio Virosis Respiratorias-Departamento Virología-INEI	Instituto Nacional Enfermedades Infecciosas C.G.Malbran	Baumeister E. et al
Argentina/INEI116168/2021	EPI_ISL_9189339	2021-12-23	Servicio Virosis Respiratorias-Departamento Virología-INEI	Instituto Nacional Enfermedades Infecciosas C.G.Malbran	Baumeister E. et al
Argentina/INEI116241/2021	EPI_ISL_9191889	2021-12-20	Servicio Virosis Respiratorias-Departamento Virología-INEI	Instituto Nacional Enfermedades Infecciosas C.G.Malbran	Baumeister E. et al
Argentina/INEI116243/2021	EPI_ISL_9191890	2021-12-20	Servicio Virosis Respiratorias-Departamento Virología-INEI	Instituto Nacional Enfermedades Infecciosas C.G.Malbran	Baumeister E. et al
Argentina/INEI116275/2021	EPI_ISL_9192096	2021-12-27	Servicio Virosis Respiratorias-Departamento Virología-INEI	Instituto Nacional Enfermedades Infecciosas C.G.Malbran	Baumeister E. et al
Argentina/INEI116332/2021	EPI_ISL_9191956	2021-12-18	Servicio Virosis Respiratorias-Departamento Virología-INEI	Instituto Nacional Enfermedades Infecciosas C.G.Malbran	Baumeister E. et al
Argentina/INEI116429/2021	EPI_ISL_9191709	2021-12-22	Servicio Virosis Respiratorias-Departamento Virología-INEI	Instituto Nacional Enfermedades Infecciosas C.G.Malbran	Baumeister E. et al
Argentina/INEI116452/2021	EPI_ISL_9192125	2021-12-27	Servicio Virosis Respiratorias-Departamento Virología-INEI	Instituto Nacional Enfermedades Infecciosas C.G.Malbran	Baumeister E. et al
Argentina/INEI116454/2021	EPI_ISL_10705400	2021-12-27	Servicio Virosis Respiratorias-Departamento Virología-INEI	Instituto Nacional Enfermedades Infecciosas C.G.Malbran	Baumeister E. et al
Argentina/INEI116588/2021	EPI_ISL_9191717	2021-12-26	Servicio Virosis Respiratorias-Departamento Virología-INEI	Instituto Nacional Enfermedades Infecciosas C.G.Malbran	Baumeister E. et al
Argentina/INEI116603/2021	EPI_ISL_9192260	2021-12-20	Servicio Virosis Respiratorias-Departamento Virología-INEI	Instituto Nacional Enfermedades Infecciosas C.G.Malbran	Baumeister E. et al
Argentina/INEI116618/2021	EPI_ISL_10705416	2021-12-22	Servicio Virosis Respiratorias-Departamento Virología-INEI	Instituto Nacional Enfermedades Infecciosas C.G.Malbran	Baumeister E. et al
Argentina/INEI116619/2021	EPI_ISL_10705417	2021-12-22	Servicio Virosis Respiratorias-Departamento Virología-INEI	Instituto Nacional Enfermedades Infecciosas C.G.Malbran	Baumeister E. et al
Argentina/INEI116622/2021	EPI_ISL_10705419	2021-12-22	Servicio Virosis Respiratorias-Departamento Virología-INEI	Instituto Nacional Enfermedades Infecciosas C.G.Malbran	Baumeister E. et al
Argentina/INEI116623/2021	EPI_ISL_10705420	2021-12-22	Servicio Virosis Respiratorias-Departamento Virología-INEI	Instituto Nacional Enfermedades Infecciosas C.G.Malbran	Baumeister E. et al
Argentina/INEI116632/2021	EPI_ISL_9191894	2021-12-20	Servicio Virosis Respiratorias-Departamento Virología-INEI	Instituto Nacional Enfermedades Infecciosas C.G.Malbran	Baumeister E. et al
Argentina/INEI116638/2021	EPI_ISL_9191895	2021-12-22	Servicio Virosis Respiratorias-Departamento Virología-INEI	Instituto Nacional Enfermedades Infecciosas C.G.Malbran	Baumeister E. et al
Argentina/INEI116641/2021	EPI_ISL_9191765	2021-12-21	Servicio Virosis Respiratorias-Departamento Virología-INEI	Instituto Nacional Enfermedades Infecciosas C.G.Malbran	Baumeister E. et al
Argentina/INEI116643/2021	EPI_ISL_9192248	2021-12-18	Servicio Virosis Respiratorias-Departamento Virología-INEI	Instituto Nacional Enfermedades Infecciosas C.G.Malbran	Baumeister E. et al
Argentina/INEI116653/2021	EPI_ISL_9191897	2021-12-21	Servicio Virosis Respiratorias-Departamento Virología-INEI	Instituto Nacional Enfermedades Infecciosas C.G.Malbran	Baumeister E. et al
Argentina/INEI116662/2021	EPI_ISL_9191902	2021-12-21	Servicio Virosis Respiratorias-Departamento Virología-INEI	Instituto Nacional Enfermedades Infecciosas C.G.Malbran	Baumeister E. et al
Argentina/INEI116674/2021	EPI_ISL_10705426	2021-12-17	Servicio Virosis Respiratorias-Departamento Virología-INEI	Instituto Nacional Enfermedades Infecciosas C.G.Malbran	Baumeister E. et al
Argentina/INEI116677/2021	EPI_ISL_10705427	2021-12-17	Servicio Virosis Respiratorias-Departamento Virología-INEI	Instituto Nacional Enfermedades Infecciosas C.G.Malbran	Baumeister E. et al
Argentina/INEI116678/2021	EPI_ISL_10705428	2021-12-17	Servicio Virosis Respiratorias-Departamento Virología-INEI	Instituto Nacional Enfermedades Infecciosas C.G.Malbran	Baumeister E. et al
Argentina/INEI116683/2021	EPI_ISL_10705431	2021-12-01	Servicio Virosis Respiratorias-Departamento Virología-INEI	Instituto Nacional Enfermedades Infecciosas C.G.Malbran	Baumeister E. et al
Argentina/INEI116688/2021	EPI_ISL_10705436	2021-12-20	Servicio Virosis Respiratorias-Departamento Virología-INEI	Instituto Nacional Enfermedades Infecciosas C.G.Malbran	Baumeister E. et al
Argentina/INEI116697/2021	EPI_ISL_10705443	2021-12-21	Servicio Virosis Respiratorias-Departamento Virología-INEI	Instituto Nacional Enfermedades Infecciosas C.G.Malbran	Baumeister E. et al
Argentina/INEI116699/2021	EPI_ISL_10705444	2021-12-21	Servicio Virosis Respiratorias-Departamento Virología-INEI	Instituto Nacional Enfermedades Infecciosas C.G.Malbran	Baumeister E. et al
Argentina/INEI116702/2021	EPI_ISL_10705446	2021-12-22	Servicio Virosis Respiratorias-Departamento Virología-INEI	Instituto Nacional Enfermedades Infecciosas C.G.Malbran	Baumeister E. et al
Argentina/INEI116703/2021	EPI_ISL_10705447	2021-12-22	Servicio Virosis Respiratorias-Departamento Virología-INEI	Instituto Nacional Enfermedades Infecciosas C.G.Malbran	Baumeister E. et al
Argentina/INEI116706/2021	EPI_ISL_10705449	2021-12-22	Servicio Virosis Respiratorias-Departamento Virología-INEI	Instituto Nacional Enfermedades Infecciosas C.G.Malbran	Baumeister E. et al
Argentina/INEI116707/2021	EPI_ISL_10705450	2021-12-22	Servicio Virosis Respiratorias-Departamento Virología-INEI	Instituto Nacional Enfermedades Infecciosas C.G.Malbran	Baumeister E. et al
Argentina/INEI116773/2021	EPI_ISL_9192135	2021-12-31	Servicio Virosis Respiratorias-Departamento Virología-INEI	Instituto Nacional Enfermedades Infecciosas C.G.Malbran	Baumeister E. et al
Argentina/INEI116801/2021	EPI_ISL_10705455	2021-12-20	Servicio Virosis Respiratorias-Departamento Virología-INEI	Instituto Nacional Enfermedades Infecciosas C.G.Malbran	Baumeister E. et al
Argentina/INEI116904/2022	EPI_ISL_9191864	2022-01-02	Servicio Virosis Respiratorias-Departamento Virología-INEI	Instituto Nacional Enfermedades Infecciosas C.G.Malbran	Baumeister E. et al
Argentina/INEI116922/2022	EPI_ISL_10705465	2022-01-01	Servicio Virosis Respiratorias-Departamento Virología-INEI	Instituto Nacional Enfermedades Infecciosas C.G.Malbran	Baumeister E. et al
Argentina/INEI116938/2021	EPI_ISL_9192144	2021-12-27	Servicio Virosis Respiratorias-Departamento Virología-INEI	Instituto Nacional Enfermedades Infecciosas C.G.Malbran	Baumeister E. et al
Argentina/INEI116945/2021	EPI_ISL_9191750	2021-12-25	Servicio Virosis Respiratorias-Departamento Virología-INEI	Instituto Nacional Enfermedades Infecciosas C.G.Malbran	Baumeister E. et al
Argentina/INEI117004/2021	EPI_ISL_9192063	2021-12-26	Servicio Virosis Respiratorias-Departamento Virología-INEI	Instituto Nacional Enfermedades Infecciosas C.G.Malbran	Baumeister E. et al
Argentina/INEI117017/2021	EPI_ISL_9191961	2021-12-21	Servicio Virosis Respiratorias-Departamento Virología-INEI	Instituto Nacional Enfermedades Infecciosas C.G.Malbran	Baumeister E. et al
Argentina/INEI117018/2022	EPI_ISL_9191834	2022-01-03	Servicio Virosis Respiratorias-Departamento Virología-INEI	Instituto Nacional Enfermedades Infecciosas C.G.Malbran	Baumeister E. et al
Argentina/INEI117023/2022	EPI_ISL_9192066	2022-01-03	Servicio Virosis Respiratorias-Departamento Virología-INEI	Instituto Nacional Enfermedades Infecciosas C.G.Malbran	Baumeister E. et al
Argentina/INEI117024/2021	EPI_ISL_9191642	2021-12-29	Servicio Virosis Respiratorias-Departamento Virología-INEI	Instituto Nacional Enfermedades Infecciosas C.G.Malbran	Baumeister E. et al
Argentina/INEI117063/2021	EPI_ISL_9191942	2021-12-25	Servicio Virosis Respiratorias-Departamento Virología-INEI	Instituto Nacional Enfermedades Infecciosas C.G.Malbran	Baumeister E. et al
Argentina/INEI117084/2021	EPI_ISL_9191788	2021-12-27	Servicio Virosis Respiratorias-Departamento Virología-INEI	Instituto Nacional Enfermedades Infecciosas C.G.Malbran	Baumeister E. et al
Argentina/INEI117105/2021	EPI_ISL_9191995	2021-12-24	Servicio Virosis Respiratorias-Departamento Virología-INEI	Instituto Nacional Enfermedades Infecciosas C.G.Malbran	Baumeister E. et al
Argentina/INEI117122/2021	EPI_ISL_10705477	2021-12-25	Servicio Virosis Respiratorias-Departamento Virología-INEI	Instituto Nacional Enfermedades Infecciosas C.G.Malbran	Baumeister E. et al
Argentina/INEI117125/2021	EPI_ISL_9192150	2021-12-29	Servicio Virosis Respiratorias-Departamento Virología-INEI	Instituto Nacional Enfermedades Infecciosas C.G.Malbran	Baumeister E. et al
Argentina/INEI117178/2022	EPI_ISL_9192070	2022-01-05	Servicio Virosis Respiratorias-Departamento Virología-INEI	Instituto Nacional Enfermedades Infecciosas C.G.Malbran	Baumeister E. et al
Argentina/INEI117196/2021	EPI_ISL_9191835	2021-12-28	Servicio Virosis Respiratorias-Departamento Virología-INEI	Instituto Nacional Enfermedades Infecciosas C.G.Malbran	Baumeister E. et al
Argentina/INEI117205/2021	EPI_ISL_9191919	2021-12-22	Servicio Virosis Respiratorias-Departamento Virología-INEI	Instituto Nacional Enfermedades Infecciosas C.G.Malbran	Baumeister E. et al
Argentina/INEI117209/2021	EPI_ISL_9191772	2021-12-24	Servicio Virosis Respiratorias-Departamento Virología-INEI	Instituto Nacional Enfermedades Infecciosas C.G.Malbran	Baumeister E. et al
Argentina/INEI117210/2021	EPI_ISL_9191921	2021-12-22	Servicio Virosis Respiratorias-Departamento Virología-INEI	Instituto Nacional Enfermedades Infecciosas C.G.Malbran	Baumeister E. et al
Argentina/INEI117221/2022	EPI_ISL_9191926	2022-01-02	Servicio Virosis Respiratorias-Departamento Virología-INEI	Instituto Nacional Enfermedades Infecciosas C.G.Malbran	Baumeister E. et al
Argentina/INEI117223/2021	EPI_ISL_9191791	2021-12-31	Servicio Virosis Respiratorias-Departamento Virología-INEI	Instituto Nacional Enfermedades Infecciosas C.G.Malbran	Baumeister E. et al
Argentina/INEI117224/2021	EPI_ISL_9192252	2021-12-26	Servicio Virosis Respiratorias-Departamento Virología-INEI	Instituto Nacional Enfermedades Infecciosas C.G.Malbran	Baumeister E. et al
Argentina/INEI117239/2021	EPI_ISL_9191854	2021-12-26	Servicio Virosis Respiratorias-Departamento Virología-INEI	Instituto Nacional Enfermedades Infecciosas C.G.Malbran	Baumeister E. et al
Argentina/INEI117285/2021	EPI_ISL_9192164	2021-12-30	Servicio Virosis Respiratorias-Departamento Virología-INEI	Instituto Nacional Enfermedades Infecciosas C.G.Malbran	Baumeister E. et al
Argentina/INEI117286/2021	EPI_ISL_9192165	2021-12-30	Servicio Virosis Respiratorias-Departamento Virología-INEI	Instituto Nacional Enfermedades Infecciosas C.G.Malbran	Baumeister E. et al
Argentina/INEI117410/2021	EPI_ISL_9191872	2021-12-28	Servicio Virosis Respiratorias-Departamento Virología-INEI	Instituto Nacional Enfermedades Infecciosas C.G.Malbran	Baumeister E. et al
Argentina/INEI117426/2021	EPI_ISL_9191884	2021-12-30	Servicio Virosis Respiratorias-Departamento Virología-INEI	Instituto Nacional Enfermedades Infecciosas C.G.Malbran	Baumeister E. et al
Argentina/INEI117428/2021	EPI_ISL_9191886	2021-12-28	Servicio Virosis Respiratorias-Departamento Virología-INEI	Instituto Nacional Enfermedades Infecciosas C.G.Malbran	Baumeister E. et al
Argentina/INEI117435/2022	EPI_ISL_10705486	2022-01-01	Servicio Virosis Respiratorias-Departamento Virología-INEI	Instituto Nacional Enfermedades Infecciosas C.G.Malbran	Baumeister E. et al
Argentina/INEI117442/2022	EPI_ISL_10705490	2022-01-03	Servicio Virosis Respiratorias-Departamento Virología-INEI	Instituto Nacional Enfermedades Infecciosas C.G.Malbran	Baumeister E. et al
Argentina/INEI117444/2021	EPI_ISL_10705491	2021-12-30	Servicio Virosis Respiratorias-Departamento Virología-INEI	Instituto Nacional Enfermedades Infecciosas C.G.Malbran	Baumeister E. et al
Argentina/INEI117447/2022	EPI_ISL_10705492	2022-01-11	Servicio Virosis Respiratorias-Departamento Virología-INEI	Instituto Nacional Enfermedades Infecciosas C.G.Malbran	Baumeister E. et al
Argentina/INEI117449/2022	EPI_ISL_10705493	2022-01-11	Servicio Virosis Respiratorias-Departamento Virología-INEI	Instituto Nacional Enfermedades Infecciosas C.G.Malbran	Baumeister E. et al
Argentina/INEI117463/2022	EPI_ISL_9192188	2022-01-08	Servicio Virosis Respiratorias-Departamento Virología-INEI	Instituto Nacional Enfermedades Infecciosas C.G.Malbran	Baumeister E. et al
Argentina/INEI117488/2022	EPI_ISL_9191857	2022-01-08	Servicio Virosis Respiratorias-Departamento Virología-INEI	Instituto Nacional Enfermedades Infecciosas C.G.Malbran	Baumeister E. et al
Argentina/INEI117513/2021	EPI_ISL_9192190	2021-12-03	Servicio Virosis Respiratorias-Departamento Virología-INEI	Instituto Nacional Enfermedades Infecciosas C.G.Malbran	Baumeister E. et al
Argentina/INEI117526/2022	EPI_ISL_9191849	2022-01-05	Servicio Virosis Respiratorias-Departamento Virología-INEI	Instituto Nacional Enfermedades Infecciosas C.G.Malbran	Baumeister E. et al
Argentina/INEI117527/2022	EPI_ISL_9192196	2022-01-05	Servicio Virosis Respiratorias-Departamento Virología-INEI	Instituto Nacional Enfermedades Infecciosas C.G.Malbran	Baumeister E. et al
Argentina/INEI117528/2022	EPI_ISL_9192197	2022-01-04	Servicio Virosis Respiratorias-Departamento Virología-INEI	Instituto Nacional Enfermedades Infecciosas C.G.Malbran	Baumeister E. et al
Argentina/INEI117531/2022	EPI_ISL_10705494	2022-01-09	Servicio Virosis Respiratorias-Departamento Virología-INEI	Instituto Nacional Enfermedades Infecciosas C.G.Malbran	Baumeister E. et al
Argentina/INEI117585/2022	EPI_ISL_9191930	2022-01-07	Servicio Virosis Respiratorias-Departamento Virología-INEI	Instituto Nacional Enfermedades Infecciosas C.G.Malbran	Baumeister E. et al
Argentina/INEI117620/2022	EPI_ISL_10705497	2022-01-05	Servicio Virosis Respiratorias-Departamento Virología-INEI	Instituto Nacional Enfermedades Infecciosas C.G.Malbran	Baumeister E. et al
Argentina/INEI117680/2022	EPI_ISL_9191701	2022-01-13	Servicio Virosis Respiratorias-Departamento Virología-INEI	Instituto Nacional Enfermedades Infecciosas C.G.Malbran	Baumeister E. et al
Argentina/INEI117691/2022	EPI_ISL_9191733	2022-01-05	Servicio Virosis Respiratorias-Departamento Virología-INEI	Instituto Nacional Enfermedades Infecciosas C.G.Malbran	Baumeister E. et al
Argentina/INEI117694/2022	EPI_ISL_9191786	2022-01-07	Servicio Virosis Respiratorias-Departamento Virología-INEI	Instituto Nacional Enfermedades Infecciosas C.G.Malbran	Baumeister E. et al
Argentina/INEI117695/2022	EPI_ISL_9191764	2022-01-07	Servicio Virosis Respiratorias-Departamento Virología-INEI	Instituto Nacional Enfermedades Infecciosas C.G.Malbran	Baumeister E. et al
Argentina/INEI117697/2022	EPI_ISL_9191648	2022-01-08	Servicio Virosis Respiratorias-Departamento Virología-INEI	Instituto Nacional Enfermedades Infecciosas C.G.Malbran	Baumeister E. et al
Argentina/INEI117706/2022	EPI_ISL_9191840	2022-01-11	Servicio Virosis Respiratorias-Departamento Virología-INEI	Instituto Nacional Enfermedades Infecciosas C.G.Malbran	Baumeister E. et al
Argentina/INEI117768/2021	EPI_ISL_10705499	2021-12-22	Servicio Virosis Respiratorias-Departamento Virología-INEI	Instituto Nacional Enfermedades Infecciosas C.G.Malbran	Baumeister E. et al
Argentina/INEI117771/2021	EPI_ISL_10705502	2021-12-22	Servicio Virosis Respiratorias-Departamento Virología-INEI	Instituto Nacional Enfermedades Infecciosas C.G.Malbran	Baumeister E. et al
Argentina/INEI117775/2022	EPI_ISL_10705505	2022-01-10	Servicio Virosis Respiratorias-Departamento Virología-INEI	Instituto Nacional Enfermedades Infecciosas C.G.Malbran	Baumeister E. et al
Argentina/INEI117777/2022	EPI_ISL_10705506	2022-01-10	Servicio Virosis Respiratorias-Departamento Virología-INEI	Instituto Nacional Enfermedades Infecciosas C.G.Malbran	Baumeister E. et al
Argentina/INEI117782/2022	EPI_ISL_10705511	2022-01-07	Servicio Virosis Respiratorias-Departamento Virología-INEI	Instituto Nacional Enfermedades Infecciosas C.G.Malbran	Baumeister E. et al
Argentina/INEI117785/2022	EPI_ISL_10705513	2022-01-07	Servicio Virosis Respiratorias-Departamento Virología-INEI	Instituto Nacional Enfermedades Infecciosas C.G.Malbran	Baumeister E. et al
Argentina/INEI117788/2022	EPI_ISL_10705515	2022-01-10	Servicio Virosis Respiratorias-Departamento Virología-INEI	Instituto Nacional Enfermedades Infecciosas C.G.Malbran	Baumeister E. et al
Argentina/INEI117795/2022	EPI_ISL_10705518	2022-01-08	Servicio Virosis Respiratorias-Departamento Virología-INEI	Instituto Nacional Enfermedades Infecciosas C.G.Malbran	Baumeister E. et al
Argentina/INEI117798/2022	EPI_ISL_10705519	2022-01-11	Servicio Virosis Respiratorias-Departamento Virología-INEI	Instituto Nacional Enfermedades Infecciosas C.G.Malbran	Baumeister E. et al
Argentina/INEI117804/2022	EPI_ISL_9191932	2022-01-03	Servicio Virosis Respiratorias-Departamento Virología-INEI	Instituto Nacional Enfermedades Infecciosas C.G.Malbran	Baumeister E. et al
Argentina/INEI117891/2021	EPI_ISL_9191649	2021-12-24	Servicio Virosis Respiratorias-Departamento Virología-INEI	Instituto Nacional Enfermedades Infecciosas C.G.Malbran	Baumeister E. et al
Argentina/INEI117895/2022	EPI_ISL_9191663	2022-01-05	Servicio Virosis Respiratorias-Departamento Virología-INEI	Instituto Nacional Enfermedades Infecciosas C.G.Malbran	Baumeister E. et al
Argentina/INEI117961/2022	EPI_ISL_9192094	2022-01-15	Servicio Virosis Respiratorias-Departamento Virología-INEI	Instituto Nacional Enfermedades Infecciosas C.G.Malbran	Baumeister E. et al
Argentina/INEI117989/2022	EPI_ISL_10705525	2022-01-07	Servicio Virosis Respiratorias-Departamento Virología-INEI	Instituto Nacional Enfermedades Infecciosas C.G.Malbran	Baumeister E. et al
Argentina/INEI118029/2022	EPI_ISL_9192275	2022-01-14	Servicio Virosis Respiratorias-Departamento Virología-INEI	Instituto Nacional Enfermedades Infecciosas C.G.Malbran	Baumeister E. et al
Argentina/INEI118106/2022	EPI_ISL_9261671	2022-01-10	Servicio Virosis Respiratorias-Departamento Virología-INEI	Instituto Nacional Enfermedades Infecciosas C.G.Malbran	Baumeister E. et al
Argentina/INEI118131/2022	EPI_ISL_9261680	2022-01-17	Servicio Virosis Respiratorias-Departamento Virología-INEI	Instituto Nacional Enfermedades Infecciosas C.G.Malbran	Baumeister E. et al
Argentina/INEI118141/2022	EPI_ISL_9261685	2022-01-13	Servicio Virosis Respiratorias-Departamento Virología-INEI	Instituto Nacional Enfermedades Infecciosas C.G.Malbran	Baumeister E. et al
Argentina/INEI118148/2022	EPI_ISL_9261687	2022-01-13	Servicio Virosis Respiratorias-Departamento Virología-INEI	Instituto Nacional Enfermedades Infecciosas C.G.Malbran	Baumeister E. et al
Argentina/INEI118155/2022	EPI_ISL_9261691	2022-01-13	Servicio Virosis Respiratorias-Departamento Virología-INEI	Instituto Nacional Enfermedades Infecciosas C.G.Malbran	Baumeister E. et al
Argentina/INEI118212/2022	EPI_ISL_9261709	2022-01-05	Servicio Virosis Respiratorias-Departamento Virología-INEI	Instituto Nacional Enfermedades Infecciosas C.G.Malbran	Baumeister E. et al
Argentina/INEI118215/2022	EPI_ISL_9261711	2022-01-11	Servicio Virosis Respiratorias-Departamento Virología-INEI	Instituto Nacional Enfermedades Infecciosas C.G.Malbran	Baumeister E. et al
Argentina/INEI118216/2022	EPI_ISL_9261712	2022-01-13	Servicio Virosis Respiratorias-Departamento Virología-INEI	Instituto Nacional Enfermedades Infecciosas C.G.Malbran	Baumeister E. et al
Argentina/INEI118219/2022	EPI_ISL_9261714	2022-01-17	Servicio Virosis Respiratorias-Departamento Virología-INEI	Instituto Nacional Enfermedades Infecciosas C.G.Malbran	Baumeister E. et al
Argentina/INEI118222/2022	EPI_ISL_9261717	2022-01-05	Servicio Virosis Respiratorias-Departamento Virología-INEI	Instituto Nacional Enfermedades Infecciosas C.G.Malbran	Baumeister E. et al
Argentina/INEI118240/2022	EPI_ISL_9261724	2022-01-11	Servicio Virosis Respiratorias-Departamento Virología-INEI	Instituto Nacional Enfermedades Infecciosas C.G.Malbran	Baumeister E. et al
Argentina/INEI118248/2022	EPI_ISL_9261727	2022-01-12	Servicio Virosis Respiratorias-Departamento Virología-INEI	Instituto Nacional Enfermedades Infecciosas C.G.Malbran	Baumeister E. et al
Argentina/INEI118283/2022	EPI_ISL_9861044	2022-01-10	Servicio Virosis Respiratorias-Departamento Virología-INEI	Instituto Nacional Enfermedades Infecciosas C.G.Malbran	Baumeister E. et al
Argentina/INEI118284/2022	EPI_ISL_9861045	2022-01-10	Servicio Virosis Respiratorias-Departamento Virología-INEI	Instituto Nacional Enfermedades Infecciosas C.G.Malbran	Baumeister E. et al
Argentina/INEI118289/2022	EPI_ISL_10705529	2022-01-10	Servicio Virosis Respiratorias-Departamento Virología-INEI	Instituto Nacional Enfermedades Infecciosas C.G.Malbran	Baumeister E. et al
Argentina/INEI118297/2022	EPI_ISL_9861053	2022-01-10	Servicio Virosis Respiratorias-Departamento Virología-INEI	Instituto Nacional Enfermedades Infecciosas C.G.Malbran	Baumeister E. et al
Argentina/INEI118298/2022	EPI_ISL_9861054	2022-01-10	Servicio Virosis Respiratorias-Departamento Virología-INEI	Instituto Nacional Enfermedades Infecciosas C.G.Malbran	Baumeister E. et al
Argentina/INEI118299/2022	EPI_ISL_9861055	2022-01-14	Servicio Virosis Respiratorias-Departamento Virología-INEI	Instituto Nacional Enfermedades Infecciosas C.G.Malbran	Baumeister E. et al
Argentina/INEI118300/2022	EPI_ISL_9861056	2022-01-14	Servicio Virosis Respiratorias-Departamento Virología-INEI	Instituto Nacional Enfermedades Infecciosas C.G.Malbran	Baumeister E. et al
Argentina/INEI118301/2022	EPI_ISL_9861057	2022-01-14	Servicio Virosis Respiratorias-Departamento Virología-INEI	Instituto Nacional Enfermedades Infecciosas C.G.Malbran	Baumeister E. et al
Argentina/INEI118304/2022	EPI_ISL_10705531	2022-01-14	Servicio Virosis Respiratorias-Departamento Virología-INEI	Instituto Nacional Enfermedades Infecciosas C.G.Malbran	Baumeister E. et al
Argentina/INEI118307/2022	EPI_ISL_9861059	2022-01-15	Servicio Virosis Respiratorias-Departamento Virología-INEI	Instituto Nacional Enfermedades Infecciosas C.G.Malbran	Baumeister E. et al
Argentina/INEI118331/2022	EPI_ISL_9571441	2022-01-19	Servicio Virosis Respiratorias-Departamento Virología-INEI	Instituto Nacional Enfermedades Infecciosas C.G.Malbran	Baumeister E. et al
Argentina/INEI118359/2022	EPI_ISL_9571454	2022-01-18	Servicio Virosis Respiratorias-Departamento Virología-INEI	Instituto Nacional Enfermedades Infecciosas C.G.Malbran	Baumeister E. et al
Argentina/INEI118388/2022	EPI_ISL_9571456	2022-01-21	Servicio Virosis Respiratorias-Departamento Virología-INEI	Instituto Nacional Enfermedades Infecciosas C.G.Malbran	Baumeister E. et al
Argentina/INEI118391/2022	EPI_ISL_9571459	2022-01-24	Servicio Virosis Respiratorias-Departamento Virología-INEI	Instituto Nacional Enfermedades Infecciosas C.G.Malbran	Baumeister E. et al
Argentina/INEI118404/2022	EPI_ISL_9571463	2022-01-20	Servicio Virosis Respiratorias-Departamento Virología-INEI	Instituto Nacional Enfermedades Infecciosas C.G.Malbran	Baumeister E. et al
Argentina/INEI118410/2022	EPI_ISL_9571465	2022-01-20	Servicio Virosis Respiratorias-Departamento Virología-INEI	Instituto Nacional Enfermedades Infecciosas C.G.Malbran	Baumeister E. et al
Argentina/INEI118430/2022	EPI_ISL_9571474	2022-01-21	Servicio Virosis Respiratorias-Departamento Virología-INEI	Instituto Nacional Enfermedades Infecciosas C.G.Malbran	Baumeister E. et al
Argentina/INEI118432/2022	EPI_ISL_9571476	2022-01-21	Servicio Virosis Respiratorias-Departamento Virología-INEI	Instituto Nacional Enfermedades Infecciosas C.G.Malbran	Baumeister E. et al
Argentina/INEI118447/2022	EPI_ISL_9571485	2022-01-21	Servicio Virosis Respiratorias-Departamento Virología-INEI	Instituto Nacional Enfermedades Infecciosas C.G.Malbran	Baumeister E. et al
Argentina/INEI118451/2022	EPI_ISL_9571488	2022-01-21	Servicio Virosis Respiratorias-Departamento Virología-INEI	Instituto Nacional Enfermedades Infecciosas C.G.Malbran	Baumeister E. et al
Argentina/INEI118485/2022	EPI_ISL_9571505	2022-01-24	Servicio Virosis Respiratorias-Departamento Virología-INEI	Instituto Nacional Enfermedades Infecciosas C.G.Malbran	Baumeister E. et al
Argentina/INEI118497/2022	EPI_ISL_9861067	2022-01-13	Servicio Virosis Respiratorias-Departamento Virología-INEI	Instituto Nacional Enfermedades Infecciosas C.G.Malbran	Baumeister E. et al
Argentina/INEI118505/2022	EPI_ISL_9861072	2022-01-17	Servicio Virosis Respiratorias-Departamento Virología-INEI	Instituto Nacional Enfermedades Infecciosas C.G.Malbran	Baumeister E. et al
Argentina/INEI118508/2022	EPI_ISL_9861074	2022-01-19	Servicio Virosis Respiratorias-Departamento Virología-INEI	Instituto Nacional Enfermedades Infecciosas C.G.Malbran	Baumeister E. et al
Argentina/INEI118524/2022	EPI_ISL_9861087	2022-01-09	Servicio Virosis Respiratorias-Departamento Virología-INEI	Instituto Nacional Enfermedades Infecciosas C.G.Malbran	Baumeister E. et al
Argentina/INEI118527/2022	EPI_ISL_9861090	2022-01-10	Servicio Virosis Respiratorias-Departamento Virología-INEI	Instituto Nacional Enfermedades Infecciosas C.G.Malbran	Baumeister E. et al
Argentina/INEI118538/2022	EPI_ISL_9861093	2022-01-12	Servicio Virosis Respiratorias-Departamento Virología-INEI	Instituto Nacional Enfermedades Infecciosas C.G.Malbran	Baumeister E. et al
Argentina/INEI118578/2022	EPI_ISL_9861102	2022-01-10	Servicio Virosis Respiratorias-Departamento Virología-INEI	Instituto Nacional Enfermedades Infecciosas C.G.Malbran	Baumeister E. et al
Argentina/INEI118580/2022	EPI_ISL_9861104	2022-01-11	Servicio Virosis Respiratorias-Departamento Virología-INEI	Instituto Nacional Enfermedades Infecciosas C.G.Malbran	Baumeister E. et al
Argentina/INEI118587/2022	EPI_ISL_9861109	2022-01-14	Servicio Virosis Respiratorias-Departamento Virología-INEI	Instituto Nacional Enfermedades Infecciosas C.G.Malbran	Baumeister E. et al
Argentina/INEI118589/2022	EPI_ISL_9861110	2022-01-17	Servicio Virosis Respiratorias-Departamento Virología-INEI	Instituto Nacional Enfermedades Infecciosas C.G.Malbran	Baumeister E. et al
Argentina/INEI118595/2022	EPI_ISL_9861113	2022-01-19	Servicio Virosis Respiratorias-Departamento Virología-INEI	Instituto Nacional Enfermedades Infecciosas C.G.Malbran	Baumeister E. et al
Argentina/INEI118600/2022	EPI_ISL_9861117	2022-01-19	Servicio Virosis Respiratorias-Departamento Virología-INEI	Instituto Nacional Enfermedades Infecciosas C.G.Malbran	Baumeister E. et al
Argentina/INEI118614/2022	EPI_ISL_9861123	2022-01-22	Servicio Virosis Respiratorias-Departamento Virología-INEI	Instituto Nacional Enfermedades Infecciosas C.G.Malbran	Baumeister E. et al
Argentina/INEI118644/2022	EPI_ISL_9861126	2022-01-24	Servicio Virosis Respiratorias-Departamento Virología-INEI	Instituto Nacional Enfermedades Infecciosas C.G.Malbran	Baumeister E. et al
Argentina/INEI118654/2022	EPI_ISL_9861130	2022-01-25	Servicio Virosis Respiratorias-Departamento Virología-INEI	Instituto Nacional Enfermedades Infecciosas C.G.Malbran	Baumeister E. et al
Argentina/INEI118659/2022	EPI_ISL_9861134	2022-01-25	Servicio Virosis Respiratorias-Departamento Virología-INEI	Instituto Nacional Enfermedades Infecciosas C.G.Malbran	Baumeister E. et al
Argentina/INEI118677/2022	EPI_ISL_9861144	2022-01-26	Servicio Virosis Respiratorias-Departamento Virología-INEI	Instituto Nacional Enfermedades Infecciosas C.G.Malbran	Baumeister E. et al
Argentina/INEI118682/2022	EPI_ISL_9861146	2022-01-26	Servicio Virosis Respiratorias-Departamento Virología-INEI	Instituto Nacional Enfermedades Infecciosas C.G.Malbran	Baumeister E. et al
Argentina/INEI118688/2022	EPI_ISL_9861149	2022-01-23	Servicio Virosis Respiratorias-Departamento Virología-INEI	Instituto Nacional Enfermedades Infecciosas C.G.Malbran	Baumeister E. et al
Argentina/INEI118691/2022	EPI_ISL_9861152	2022-01-24	Servicio Virosis Respiratorias-Departamento Virología-INEI	Instituto Nacional Enfermedades Infecciosas C.G.Malbran	Baumeister E. et al
Argentina/INEI118693/2022	EPI_ISL_9861154	2022-01-26	Servicio Virosis Respiratorias-Departamento Virología-INEI	Instituto Nacional Enfermedades Infecciosas C.G.Malbran	Baumeister E. et al
Argentina/INEI118695/2022	EPI_ISL_9861156	2022-01-04	Servicio Virosis Respiratorias-Departamento Virología-INEI	Instituto Nacional Enfermedades Infecciosas C.G.Malbran	Baumeister E. et al
Argentina/INEI118701/2022	EPI_ISL_9861160	2022-01-07	Servicio Virosis Respiratorias-Departamento Virología-INEI	Instituto Nacional Enfermedades Infecciosas C.G.Malbran	Baumeister E. et al
Argentina/INEI118721/2022	EPI_ISL_9861166	2022-01-14	Servicio Virosis Respiratorias-Departamento Virología-INEI	Instituto Nacional Enfermedades Infecciosas C.G.Malbran	Baumeister E. et al
Argentina/INEI118727/2022	EPI_ISL_9861170	2022-01-24	Servicio Virosis Respiratorias-Departamento Virología-INEI	Instituto Nacional Enfermedades Infecciosas C.G.Malbran	Baumeister E. et al
Argentina/INEI118733/2022	EPI_ISL_9861173	2022-01-18	Servicio Virosis Respiratorias-Departamento Virología-INEI	Instituto Nacional Enfermedades Infecciosas C.G.Malbran	Baumeister E. et al
Argentina/INEI118736/2022	EPI_ISL_9861176	2022-01-18	Servicio Virosis Respiratorias-Departamento Virología-INEI	Instituto Nacional Enfermedades Infecciosas C.G.Malbran	Baumeister E. et al
Argentina/INEI118745/2022	EPI_ISL_9861181	2022-01-07	Servicio Virosis Respiratorias-Departamento Virología-INEI	Instituto Nacional Enfermedades Infecciosas C.G.Malbran	Baumeister E. et al
Argentina/INEI118750/2022	EPI_ISL_9861184	2022-01-18	Servicio Virosis Respiratorias-Departamento Virología-INEI	Instituto Nacional Enfermedades Infecciosas C.G.Malbran	Baumeister E. et al
Argentina/INEI118753/2022	EPI_ISL_9861185	2022-01-19	Servicio Virosis Respiratorias-Departamento Virología-INEI	Instituto Nacional Enfermedades Infecciosas C.G.Malbran	Baumeister E. et al
Argentina/INEI118755/2022	EPI_ISL_9861187	2022-01-22	Servicio Virosis Respiratorias-Departamento Virología-INEI	Instituto Nacional Enfermedades Infecciosas C.G.Malbran	Baumeister E. et al
Argentina/INEI118763/2022	EPI_ISL_9861190	2022-01-27	Servicio Virosis Respiratorias-Departamento Virología-INEI	Instituto Nacional Enfermedades Infecciosas C.G.Malbran	Baumeister E. et al
Argentina/INEI118765/2022	EPI_ISL_9861192	2022-01-27	Servicio Virosis Respiratorias-Departamento Virología-INEI	Instituto Nacional Enfermedades Infecciosas C.G.Malbran	Baumeister E. et al
Argentina/INEI118787/2021	EPI_ISL_9861203	2021-12-27	Servicio Virosis Respiratorias-Departamento Virología-INEI	Instituto Nacional Enfermedades Infecciosas C.G.Malbran	Baumeister E. et al
Argentina/INEI118791/2022	EPI_ISL_9861204	2022-01-03	Servicio Virosis Respiratorias-Departamento Virología-INEI	Instituto Nacional Enfermedades Infecciosas C.G.Malbran	Baumeister E. et al
Argentina/INEI118797/2022	EPI_ISL_9861209	2022-01-17	Servicio Virosis Respiratorias-Departamento Virología-INEI	Instituto Nacional Enfermedades Infecciosas C.G.Malbran	Baumeister E. et al
Argentina/INEI118807/2022	EPI_ISL_9861213	2022-01-19	Servicio Virosis Respiratorias-Departamento Virología-INEI	Instituto Nacional Enfermedades Infecciosas C.G.Malbran	Baumeister E. et al
Argentina/INEI118811/2022	EPI_ISL_9861216	2022-01-20	Servicio Virosis Respiratorias-Departamento Virología-INEI	Instituto Nacional Enfermedades Infecciosas C.G.Malbran	Baumeister E. et al
Argentina/INEI118812/2022	EPI_ISL_9861217	2022-01-20	Servicio Virosis Respiratorias-Departamento Virología-INEI	Instituto Nacional Enfermedades Infecciosas C.G.Malbran	Baumeister E. et al
Argentina/INEI118813/2022	EPI_ISL_9861218	2022-01-21	Servicio Virosis Respiratorias-Departamento Virología-INEI	Instituto Nacional Enfermedades Infecciosas C.G.Malbran	Baumeister E. et al
Argentina/INEI118844/2022	EPI_ISL_9861223	2022-01-30	Servicio Virosis Respiratorias-Departamento Virología-INEI	Instituto Nacional Enfermedades Infecciosas C.G.Malbran	Baumeister E. et al
Argentina/INEI118847/2022	EPI_ISL_12484203	2022-01-26	Servicio Virosis Respiratorias-Departamento Virología-INEI	Instituto Nacional Enfermedades Infecciosas C.G.Malbran	Baumeister E. et al
Argentina/INEI118852/2022	EPI_ISL_12484206	2022-01-26	Servicio Virosis Respiratorias-Departamento Virología-INEI	Instituto Nacional Enfermedades Infecciosas C.G.Malbran	Baumeister E. et al
Argentina/INEI118853/2022	EPI_ISL_12484207	2022-01-25	Servicio Virosis Respiratorias-Departamento Virología-INEI	Instituto Nacional Enfermedades Infecciosas C.G.Malbran	Baumeister E. et al
Argentina/INEI118856/2022	EPI_ISL_12484209	2022-01-26	Servicio Virosis Respiratorias-Departamento Virología-INEI	Instituto Nacional Enfermedades Infecciosas C.G.Malbran	Baumeister E. et al
Argentina/INEI118857/2022	EPI_ISL_12484210	2022-01-27	Servicio Virosis Respiratorias-Departamento Virología-INEI	Instituto Nacional Enfermedades Infecciosas C.G.Malbran	Baumeister E. et al
Argentina/INEI118859/2022	EPI_ISL_12484211	2022-01-26	Servicio Virosis Respiratorias-Departamento Virología-INEI	Instituto Nacional Enfermedades Infecciosas C.G.Malbran	Baumeister E. et al
Argentina/INEI118860/2022	EPI_ISL_12484212	2022-01-26	Servicio Virosis Respiratorias-Departamento Virología-INEI	Instituto Nacional Enfermedades Infecciosas C.G.Malbran	Baumeister E. et al
Argentina/INEI118866/2022	EPI_ISL_9861225	2022-01-27	Servicio Virosis Respiratorias-Departamento Virología-INEI	Instituto Nacional Enfermedades Infecciosas C.G.Malbran	Baumeister E. et al
Argentina/INEI118873/2022	EPI_ISL_9861230	2022-01-12	Servicio Virosis Respiratorias-Departamento Virología-INEI	Instituto Nacional Enfermedades Infecciosas C.G.Malbran	Baumeister E. et al
Argentina/INEI118883/2022	EPI_ISL_9861235	2022-01-08	Servicio Virosis Respiratorias-Departamento Virología-INEI	Instituto Nacional Enfermedades Infecciosas C.G.Malbran	Baumeister E. et al
Argentina/INEI118885/2022	EPI_ISL_9861237	2022-01-08	Servicio Virosis Respiratorias-Departamento Virología-INEI	Instituto Nacional Enfermedades Infecciosas C.G.Malbran	Baumeister E. et al
Argentina/INEI118889/2022	EPI_ISL_9861238	2022-01-07	Servicio Virosis Respiratorias-Departamento Virología-INEI	Instituto Nacional Enfermedades Infecciosas C.G.Malbran	Baumeister E. et al
Argentina/INEI118900/2021	EPI_ISL_9861248	2021-12-30	Servicio Virosis Respiratorias-Departamento Virología-INEI	Instituto Nacional Enfermedades Infecciosas C.G.Malbran	Baumeister E. et al
Argentina/INEI118912/2022	EPI_ISL_9861259	2022-01-02	Servicio Virosis Respiratorias-Departamento Virología-INEI	Instituto Nacional Enfermedades Infecciosas C.G.Malbran	Baumeister E. et al
Argentina/INEI118920/2022	EPI_ISL_9861266	2022-01-04	Servicio Virosis Respiratorias-Departamento Virología-INEI	Instituto Nacional Enfermedades Infecciosas C.G.Malbran	Baumeister E. et al
Argentina/INEI118921/2021	EPI_ISL_9861267	2021-12-29	Servicio Virosis Respiratorias-Departamento Virología-INEI	Instituto Nacional Enfermedades Infecciosas C.G.Malbran	Baumeister E. et al
Argentina/INEI118926/2022	EPI_ISL_9861270	2022-01-16	Servicio Virosis Respiratorias-Departamento Virología-INEI	Instituto Nacional Enfermedades Infecciosas C.G.Malbran	Baumeister E. et al
Argentina/INEI118934/2022	EPI_ISL_9861275	2022-01-17	Servicio Virosis Respiratorias-Departamento Virología-INEI	Instituto Nacional Enfermedades Infecciosas C.G.Malbran	Baumeister E. et al
Argentina/INEI118954/2022	EPI_ISL_9861283	2022-01-31	Servicio Virosis Respiratorias-Departamento Virología-INEI	Instituto Nacional Enfermedades Infecciosas C.G.Malbran	Baumeister E. et al
Argentina/INEI118979/2022	EPI_ISL_9861289	2022-01-14	Servicio Virosis Respiratorias-Departamento Virología-INEI	Instituto Nacional Enfermedades Infecciosas C.G.Malbran	Baumeister E. et al
Argentina/INEI118982/2022	EPI_ISL_9861291	2022-01-18	Servicio Virosis Respiratorias-Departamento Virología-INEI	Instituto Nacional Enfermedades Infecciosas C.G.Malbran	Baumeister E. et al
Argentina/INEI118991/2022	EPI_ISL_9861300	2022-01-26	Servicio Virosis Respiratorias-Departamento Virología-INEI	Instituto Nacional Enfermedades Infecciosas C.G.Malbran	Baumeister E. et al
Argentina/INEI119003/2022	EPI_ISL_9861308	2022-01-14	Servicio Virosis Respiratorias-Departamento Virología-INEI	Instituto Nacional Enfermedades Infecciosas C.G.Malbran	Baumeister E. et al
Argentina/INEI119009/2022	EPI_ISL_9861313	2022-01-14	Servicio Virosis Respiratorias-Departamento Virología-INEI	Instituto Nacional Enfermedades Infecciosas C.G.Malbran	Baumeister E. et al
Argentina/INEI119017/2022	EPI_ISL_9861317	2022-01-16	Servicio Virosis Respiratorias-Departamento Virología-INEI	Instituto Nacional Enfermedades Infecciosas C.G.Malbran	Baumeister E. et al
Argentina/INEI119018/2022	EPI_ISL_9861318	2022-01-17	Servicio Virosis Respiratorias-Departamento Virología-INEI	Instituto Nacional Enfermedades Infecciosas C.G.Malbran	Baumeister E. et al
Argentina/INEI119020/2022	EPI_ISL_9861319	2022-01-24	Servicio Virosis Respiratorias-Departamento Virología-INEI	Instituto Nacional Enfermedades Infecciosas C.G.Malbran	Baumeister E. et al
Argentina/INEI119029/2022	EPI_ISL_9861324	2022-02-01	Servicio Virosis Respiratorias-Departamento Virología-INEI	Instituto Nacional Enfermedades Infecciosas C.G.Malbran	Baumeister E. et al
Argentina/INEI119052/2022	EPI_ISL_9861332	2022-01-26	Servicio Virosis Respiratorias-Departamento Virología-INEI	Instituto Nacional Enfermedades Infecciosas C.G.Malbran	Baumeister E. et al
Argentina/INEI119053/2022	EPI_ISL_9861333	2022-01-26	Servicio Virosis Respiratorias-Departamento Virología-INEI	Instituto Nacional Enfermedades Infecciosas C.G.Malbran	Baumeister E. et al
Argentina/INEI119056/2022	EPI_ISL_9861336	2022-01-27	Servicio Virosis Respiratorias-Departamento Virología-INEI	Instituto Nacional Enfermedades Infecciosas C.G.Malbran	Baumeister E. et al
Argentina/INEI119057/2022	EPI_ISL_9861337	2022-01-24	Servicio Virosis Respiratorias-Departamento Virología-INEI	Instituto Nacional Enfermedades Infecciosas C.G.Malbran	Baumeister E. et al
Argentina/INEI119058/2022	EPI_ISL_9861338	2022-01-24	Servicio Virosis Respiratorias-Departamento Virología-INEI	Instituto Nacional Enfermedades Infecciosas C.G.Malbran	Baumeister E. et al
Argentina/INEI119061/2022	EPI_ISL_10080858	2022-01-28	Servicio Virosis Respiratorias-Departamento Virología-INEI	Instituto Nacional Enfermedades Infecciosas C.G.Malbran	Baumeister E. et al
Argentina/INEI119064/2022	EPI_ISL_10080860	2022-01-28	Servicio Virosis Respiratorias-Departamento Virología-INEI	Instituto Nacional Enfermedades Infecciosas C.G.Malbran	Baumeister E. et al
Argentina/INEI119071/2022	EPI_ISL_10080862	2022-01-24	Servicio Virosis Respiratorias-Departamento Virología-INEI	Instituto Nacional Enfermedades Infecciosas C.G.Malbran	Baumeister E. et al
Argentina/INEI119078/2022	EPI_ISL_10080866	2022-01-28	Servicio Virosis Respiratorias-Departamento Virología-INEI	Instituto Nacional Enfermedades Infecciosas C.G.Malbran	Baumeister E. et al
Argentina/INEI119084/2022	EPI_ISL_10080869	2022-02-01	Servicio Virosis Respiratorias-Departamento Virología-INEI	Instituto Nacional Enfermedades Infecciosas C.G.Malbran	Baumeister E. et al
Argentina/INEI119085/2022	EPI_ISL_10080870	2022-02-01	Servicio Virosis Respiratorias-Departamento Virología-INEI	Instituto Nacional Enfermedades Infecciosas C.G.Malbran	Baumeister E. et al
Argentina/INEI119086/2022	EPI_ISL_10080871	2022-02-01	Servicio Virosis Respiratorias-Departamento Virología-INEI	Instituto Nacional Enfermedades Infecciosas C.G.Malbran	Baumeister E. et al
Argentina/INEI119087/2022	EPI_ISL_10080872	2022-01-17	Servicio Virosis Respiratorias-Departamento Virología-INEI	Instituto Nacional Enfermedades Infecciosas C.G.Malbran	Baumeister E. et al
Argentina/INEI119097/2022	EPI_ISL_10080878	2022-01-17	Servicio Virosis Respiratorias-Departamento Virología-INEI	Instituto Nacional Enfermedades Infecciosas C.G.Malbran	Baumeister E. et al
Argentina/INEI119114/2022	EPI_ISL_10080884	2022-02-02	Servicio Virosis Respiratorias-Departamento Virología-INEI	Instituto Nacional Enfermedades Infecciosas C.G.Malbran	Baumeister E. et al
Argentina/INEI119119/2022	EPI_ISL_10080887	2022-02-02	Servicio Virosis Respiratorias-Departamento Virología-INEI	Instituto Nacional Enfermedades Infecciosas C.G.Malbran	Baumeister E. et al
Argentina/INEI119122/2022	EPI_ISL_12484213	2022-01-19	Servicio Virosis Respiratorias-Departamento Virología-INEI	Instituto Nacional Enfermedades Infecciosas C.G.Malbran	Baumeister E. et al
Argentina/INEI119127/2022	EPI_ISL_10080890	2022-01-31	Servicio Virosis Respiratorias-Departamento Virología-INEI	Instituto Nacional Enfermedades Infecciosas C.G.Malbran	Baumeister E. et al
Argentina/INEI119129/2022	EPI_ISL_10080892	2022-01-31	Servicio Virosis Respiratorias-Departamento Virología-INEI	Instituto Nacional Enfermedades Infecciosas C.G.Malbran	Baumeister E. et al
Argentina/INEI119142/2022	EPI_ISL_10080897	2022-02-03	Servicio Virosis Respiratorias-Departamento Virología-INEI	Instituto Nacional Enfermedades Infecciosas C.G.Malbran	Baumeister E. et al
Argentina/INEI119144/2022	EPI_ISL_12484215	2022-01-11	Servicio Virosis Respiratorias-Departamento Virología-INEI	Instituto Nacional Enfermedades Infecciosas C.G.Malbran	Baumeister E. et al
Argentina/INEI119146/2022	EPI_ISL_10080899	2022-01-29	Servicio Virosis Respiratorias-Departamento Virología-INEI	Instituto Nacional Enfermedades Infecciosas C.G.Malbran	Baumeister E. et al
Argentina/INEI119154/2022	EPI_ISL_10080905	2022-01-16	Servicio Virosis Respiratorias-Departamento Virología-INEI	Instituto Nacional Enfermedades Infecciosas C.G.Malbran	Baumeister E. et al
Argentina/INEI119159/2022	EPI_ISL_10080908	2022-01-20	Servicio Virosis Respiratorias-Departamento Virología-INEI	Instituto Nacional Enfermedades Infecciosas C.G.Malbran	Baumeister E. et al
Argentina/INEI119172/2022	EPI_ISL_10080920	2022-01-19	Servicio Virosis Respiratorias-Departamento Virología-INEI	Instituto Nacional Enfermedades Infecciosas C.G.Malbran	Baumeister E. et al
Argentina/INEI119174/2022	EPI_ISL_10080922	2022-01-24	Servicio Virosis Respiratorias-Departamento Virología-INEI	Instituto Nacional Enfermedades Infecciosas C.G.Malbran	Baumeister E. et al
Argentina/INEI119175/2022	EPI_ISL_10080923	2022-01-26	Servicio Virosis Respiratorias-Departamento Virología-INEI	Instituto Nacional Enfermedades Infecciosas C.G.Malbran	Baumeister E. et al
Argentina/INEI119176/2022	EPI_ISL_10080924	2022-01-26	Servicio Virosis Respiratorias-Departamento Virología-INEI	Instituto Nacional Enfermedades Infecciosas C.G.Malbran	Baumeister E. et al
Argentina/INEI119179/2022	EPI_ISL_10080926	2022-01-03	Servicio Virosis Respiratorias-Departamento Virología-INEI	Instituto Nacional Enfermedades Infecciosas C.G.Malbran	Baumeister E. et al
Argentina/INEI119181/2022	EPI_ISL_10080928	2022-01-05	Servicio Virosis Respiratorias-Departamento Virología-INEI	Instituto Nacional Enfermedades Infecciosas C.G.Malbran	Baumeister E. et al
Argentina/INEI119182/2022	EPI_ISL_10080929	2022-01-04	Servicio Virosis Respiratorias-Departamento Virología-INEI	Instituto Nacional Enfermedades Infecciosas C.G.Malbran	Baumeister E. et al
Argentina/INEI119185/2022	EPI_ISL_10080932	2022-01-04	Servicio Virosis Respiratorias-Departamento Virología-INEI	Instituto Nacional Enfermedades Infecciosas C.G.Malbran	Baumeister E. et al
Argentina/INEI119186/2022	EPI_ISL_10080933	2022-01-06	Servicio Virosis Respiratorias-Departamento Virología-INEI	Instituto Nacional Enfermedades Infecciosas C.G.Malbran	Baumeister E. et al
Argentina/INEI119187/2022	EPI_ISL_10080934	2022-01-07	Servicio Virosis Respiratorias-Departamento Virología-INEI	Instituto Nacional Enfermedades Infecciosas C.G.Malbran	Baumeister E. et al
Argentina/INEI119188/2022	EPI_ISL_10080935	2022-01-10	Servicio Virosis Respiratorias-Departamento Virología-INEI	Instituto Nacional Enfermedades Infecciosas C.G.Malbran	Baumeister E. et al
Argentina/INEI119190/2022	EPI_ISL_10080937	2022-01-12	Servicio Virosis Respiratorias-Departamento Virología-INEI	Instituto Nacional Enfermedades Infecciosas C.G.Malbran	Baumeister E. et al
Argentina/INEI119198/2022	EPI_ISL_10080940	2022-01-18	Servicio Virosis Respiratorias-Departamento Virología-INEI	Instituto Nacional Enfermedades Infecciosas C.G.Malbran	Baumeister E. et al
Argentina/INEI119205/2022	EPI_ISL_10080945	2022-01-25	Servicio Virosis Respiratorias-Departamento Virología-INEI	Instituto Nacional Enfermedades Infecciosas C.G.Malbran	Baumeister E. et al
Argentina/INEI119214/2022	EPI_ISL_10080949	2022-02-04	Servicio Virosis Respiratorias-Departamento Virología-INEI	Instituto Nacional Enfermedades Infecciosas C.G.Malbran	Baumeister E. et al
Argentina/INEI119240/2022	EPI_ISL_10080960	2022-02-07	Servicio Virosis Respiratorias-Departamento Virología-INEI	Instituto Nacional Enfermedades Infecciosas C.G.Malbran	Baumeister E. et al
Argentina/INEI119244/2022	EPI_ISL_10080963	2022-02-07	Servicio Virosis Respiratorias-Departamento Virología-INEI	Instituto Nacional Enfermedades Infecciosas C.G.Malbran	Baumeister E. et al
Argentina/INEI119254/2022	EPI_ISL_10080964	2022-01-21	Servicio Virosis Respiratorias-Departamento Virología-INEI	Instituto Nacional Enfermedades Infecciosas C.G.Malbran	Baumeister E. et al
Argentina/INEI119262/2022	EPI_ISL_10320324	2022-02-08	Servicio Virosis Respiratorias-Departamento Virología-INEI	Instituto Nacional Enfermedades Infecciosas C.G.Malbran	Baumeister E. et al
Argentina/INEI119269/2022	EPI_ISL_10320327	2022-02-06	Servicio Virosis Respiratorias-Departamento Virología-INEI	Instituto Nacional Enfermedades Infecciosas C.G.Malbran	Baumeister E. et al
Argentina/INEI119271/2022	EPI_ISL_10320329	2022-02-01	Servicio Virosis Respiratorias-Departamento Virología-INEI	Instituto Nacional Enfermedades Infecciosas C.G.Malbran	Baumeister E. et al
Argentina/INEI119276/2022	EPI_ISL_10320330	2022-02-04	Servicio Virosis Respiratorias-Departamento Virología-INEI	Instituto Nacional Enfermedades Infecciosas C.G.Malbran	Baumeister E. et al
Argentina/INEI119298/2022	EPI_ISL_10320333	2022-01-31	Servicio Virosis Respiratorias-Departamento Virología-INEI	Instituto Nacional Enfermedades Infecciosas C.G.Malbran	Baumeister E. et al
Argentina/INEI119299/2022	EPI_ISL_10320334	2022-02-01	Servicio Virosis Respiratorias-Departamento Virología-INEI	Instituto Nacional Enfermedades Infecciosas C.G.Malbran	Baumeister E. et al
Argentina/INEI119305/2022	EPI_ISL_10320336	2022-01-31	Servicio Virosis Respiratorias-Departamento Virología-INEI	Instituto Nacional Enfermedades Infecciosas C.G.Malbran	Baumeister E. et al
Argentina/INEI119308/2022	EPI_ISL_10320338	2022-01-31	Servicio Virosis Respiratorias-Departamento Virología-INEI	Instituto Nacional Enfermedades Infecciosas C.G.Malbran	Baumeister E. et al
Argentina/INEI119316/2022	EPI_ISL_10320345	2022-01-31	Servicio Virosis Respiratorias-Departamento Virología-INEI	Instituto Nacional Enfermedades Infecciosas C.G.Malbran	Baumeister E. et al
Argentina/INEI119320/2022	EPI_ISL_10320347	2022-01-31	Servicio Virosis Respiratorias-Departamento Virología-INEI	Instituto Nacional Enfermedades Infecciosas C.G.Malbran	Baumeister E. et al
Argentina/INEI119321/2022	EPI_ISL_10320348	2022-01-31	Servicio Virosis Respiratorias-Departamento Virología-INEI	Instituto Nacional Enfermedades Infecciosas C.G.Malbran	Baumeister E. et al
Argentina/INEI119322/2022	EPI_ISL_10320349	2022-01-31	Servicio Virosis Respiratorias-Departamento Virología-INEI	Instituto Nacional Enfermedades Infecciosas C.G.Malbran	Baumeister E. et al
Argentina/INEI119338/2022	EPI_ISL_10320352	2022-02-04	Servicio Virosis Respiratorias-Departamento Virología-INEI	Instituto Nacional Enfermedades Infecciosas C.G.Malbran	Baumeister E. et al
Argentina/INEI119351/2022	EPI_ISL_10705536	2022-02-04	Servicio Virosis Respiratorias-Departamento Virología-INEI	Instituto Nacional Enfermedades Infecciosas C.G.Malbran	Baumeister E. et al
Argentina/INEI119353/2022	EPI_ISL_10705538	2022-02-02	Servicio Virosis Respiratorias-Departamento Virología-INEI	Instituto Nacional Enfermedades Infecciosas C.G.Malbran	Baumeister E. et al
Argentina/INEI119356/2022	EPI_ISL_10705541	2022-02-09	Servicio Virosis Respiratorias-Departamento Virología-INEI	Instituto Nacional Enfermedades Infecciosas C.G.Malbran	Baumeister E. et al
Argentina/INEI119369/2022	EPI_ISL_10705546	2022-01-09	Servicio Virosis Respiratorias-Departamento Virología-INEI	Instituto Nacional Enfermedades Infecciosas C.G.Malbran	Baumeister E. et al
Argentina/INEI119374/2022	EPI_ISL_12484219	2022-02-03	Servicio Virosis Respiratorias-Departamento Virología-INEI	Instituto Nacional Enfermedades Infecciosas C.G.Malbran	Baumeister E. et al
Argentina/INEI119375/2022	EPI_ISL_12484220	2022-02-04	Servicio Virosis Respiratorias-Departamento Virología-INEI	Instituto Nacional Enfermedades Infecciosas C.G.Malbran	Baumeister E. et al
Argentina/INEI119379/2022	EPI_ISL_12484222	2022-02-03	Servicio Virosis Respiratorias-Departamento Virología-INEI	Instituto Nacional Enfermedades Infecciosas C.G.Malbran	Baumeister E. et al
Argentina/INEI119380/2022	EPI_ISL_12484223	2022-02-03	Servicio Virosis Respiratorias-Departamento Virología-INEI	Instituto Nacional Enfermedades Infecciosas C.G.Malbran	Baumeister E. et al
Argentina/INEI119381/2022	EPI_ISL_12484224	2022-02-02	Servicio Virosis Respiratorias-Departamento Virología-INEI	Instituto Nacional Enfermedades Infecciosas C.G.Malbran	Baumeister E. et al
Argentina/INEI119394/2022	EPI_ISL_10320360	2022-02-01	Servicio Virosis Respiratorias-Departamento Virología-INEI	Instituto Nacional Enfermedades Infecciosas C.G.Malbran	Baumeister E. et al
Argentina/INEI119402/2022	EPI_ISL_10705550	2022-02-11	Servicio Virosis Respiratorias-Departamento Virología-INEI	Instituto Nacional Enfermedades Infecciosas C.G.Malbran	Baumeister E. et al
Argentina/INEI119403/2022	EPI_ISL_10705551	2022-02-01	Servicio Virosis Respiratorias-Departamento Virología-INEI	Instituto Nacional Enfermedades Infecciosas C.G.Malbran	Baumeister E. et al
Argentina/INEI119413/2022	EPI_ISL_10705557	2022-02-13	Servicio Virosis Respiratorias-Departamento Virología-INEI	Instituto Nacional Enfermedades Infecciosas C.G.Malbran	Baumeister E. et al
Argentina/INEI119414/2022	EPI_ISL_10705558	2022-02-13	Servicio Virosis Respiratorias-Departamento Virología-INEI	Instituto Nacional Enfermedades Infecciosas C.G.Malbran	Baumeister E. et al
Argentina/INEI119416/2022	EPI_ISL_10705559	2022-02-13	Servicio Virosis Respiratorias-Departamento Virología-INEI	Instituto Nacional Enfermedades Infecciosas C.G.Malbran	Baumeister E. et al
Argentina/INEI119421/2022	EPI_ISL_10705560	2022-02-05	Servicio Virosis Respiratorias-Departamento Virología-INEI	Instituto Nacional Enfermedades Infecciosas C.G.Malbran	Baumeister E. et al
Argentina/INEI119445/2022	EPI_ISL_10705563	2022-01-26	Servicio Virosis Respiratorias-Departamento Virología-INEI	Instituto Nacional Enfermedades Infecciosas C.G.Malbran	Baumeister E. et al
Argentina/INEI119447/2022	EPI_ISL_10705564	2022-01-26	Servicio Virosis Respiratorias-Departamento Virología-INEI	Instituto Nacional Enfermedades Infecciosas C.G.Malbran	Baumeister E. et al
Argentina/INEI119448/2022	EPI_ISL_10705565	2022-01-26	Servicio Virosis Respiratorias-Departamento Virología-INEI	Instituto Nacional Enfermedades Infecciosas C.G.Malbran	Baumeister E. et al
Argentina/INEI119449/2022	EPI_ISL_10705566	2022-01-26	Servicio Virosis Respiratorias-Departamento Virología-INEI	Instituto Nacional Enfermedades Infecciosas C.G.Malbran	Baumeister E. et al
Argentina/INEI119450/2022	EPI_ISL_10705567	2022-01-26	Servicio Virosis Respiratorias-Departamento Virología-INEI	Instituto Nacional Enfermedades Infecciosas C.G.Malbran	Baumeister E. et al
Argentina/INEI119451/2022	EPI_ISL_10705568	2022-01-26	Servicio Virosis Respiratorias-Departamento Virología-INEI	Instituto Nacional Enfermedades Infecciosas C.G.Malbran	Baumeister E. et al
Argentina/INEI119452/2022	EPI_ISL_10705569	2022-01-26	Servicio Virosis Respiratorias-Departamento Virología-INEI	Instituto Nacional Enfermedades Infecciosas C.G.Malbran	Baumeister E. et al
Argentina/INEI119454/2022	EPI_ISL_10705571	2022-01-26	Servicio Virosis Respiratorias-Departamento Virología-INEI	Instituto Nacional Enfermedades Infecciosas C.G.Malbran	Baumeister E. et al
Argentina/INEI119455/2022	EPI_ISL_10705572	2022-01-26	Servicio Virosis Respiratorias-Departamento Virología-INEI	Instituto Nacional Enfermedades Infecciosas C.G.Malbran	Baumeister E. et al
Argentina/INEI119457/2022	EPI_ISL_10705574	2022-01-27	Servicio Virosis Respiratorias-Departamento Virología-INEI	Instituto Nacional Enfermedades Infecciosas C.G.Malbran	Baumeister E. et al
Argentina/INEI119458/2022	EPI_ISL_10705575	2022-01-27	Servicio Virosis Respiratorias-Departamento Virología-INEI	Instituto Nacional Enfermedades Infecciosas C.G.Malbran	Baumeister E. et al
Argentina/INEI119462/2022	EPI_ISL_10705578	2022-01-27	Servicio Virosis Respiratorias-Departamento Virología-INEI	Instituto Nacional Enfermedades Infecciosas C.G.Malbran	Baumeister E. et al
Argentina/INEI119465/2022	EPI_ISL_10705581	2022-01-27	Servicio Virosis Respiratorias-Departamento Virología-INEI	Instituto Nacional Enfermedades Infecciosas C.G.Malbran	Baumeister E. et al
Argentina/INEI119467/2022	EPI_ISL_10705582	2022-01-27	Servicio Virosis Respiratorias-Departamento Virología-INEI	Instituto Nacional Enfermedades Infecciosas C.G.Malbran	Baumeister E. et al
Argentina/INEI119470/2022	EPI_ISL_10705585	2022-01-28	Servicio Virosis Respiratorias-Departamento Virología-INEI	Instituto Nacional Enfermedades Infecciosas C.G.Malbran	Baumeister E. et al
Argentina/INEI119471/2022	EPI_ISL_10705586	2022-01-28	Servicio Virosis Respiratorias-Departamento Virología-INEI	Instituto Nacional Enfermedades Infecciosas C.G.Malbran	Baumeister E. et al
Argentina/INEI119472/2022	EPI_ISL_10705587	2022-01-28	Servicio Virosis Respiratorias-Departamento Virología-INEI	Instituto Nacional Enfermedades Infecciosas C.G.Malbran	Baumeister E. et al
Argentina/INEI119473/2022	EPI_ISL_10705588	2022-01-28	Servicio Virosis Respiratorias-Departamento Virología-INEI	Instituto Nacional Enfermedades Infecciosas C.G.Malbran	Baumeister E. et al
Argentina/INEI119475/2022	EPI_ISL_10705589	2022-01-28	Servicio Virosis Respiratorias-Departamento Virología-INEI	Instituto Nacional Enfermedades Infecciosas C.G.Malbran	Baumeister E. et al
Argentina/INEI119477/2022	EPI_ISL_10705590	2022-01-31	Servicio Virosis Respiratorias-Departamento Virología-INEI	Instituto Nacional Enfermedades Infecciosas C.G.Malbran	Baumeister E. et al
Argentina/INEI119480/2022	EPI_ISL_10705593	2022-01-31	Servicio Virosis Respiratorias-Departamento Virología-INEI	Instituto Nacional Enfermedades Infecciosas C.G.Malbran	Baumeister E. et al
Argentina/INEI119481/2022	EPI_ISL_10705594	2022-02-03	Servicio Virosis Respiratorias-Departamento Virología-INEI	Instituto Nacional Enfermedades Infecciosas C.G.Malbran	Baumeister E. et al
Argentina/INEI119482/2022	EPI_ISL_10705595	2022-02-07	Servicio Virosis Respiratorias-Departamento Virología-INEI	Instituto Nacional Enfermedades Infecciosas C.G.Malbran	Baumeister E. et al
Argentina/INEI119483/2022	EPI_ISL_10705596	2022-02-02	Servicio Virosis Respiratorias-Departamento Virología-INEI	Instituto Nacional Enfermedades Infecciosas C.G.Malbran	Baumeister E. et al
Argentina/INEI119488/2022	EPI_ISL_10705597	2022-02-01	Servicio Virosis Respiratorias-Departamento Virología-INEI	Instituto Nacional Enfermedades Infecciosas C.G.Malbran	Baumeister E. et al
Argentina/INEI119493/2022	EPI_ISL_10705599	2022-02-07	Servicio Virosis Respiratorias-Departamento Virología-INEI	Instituto Nacional Enfermedades Infecciosas C.G.Malbran	Baumeister E. et al
Argentina/INEI119494/2022	EPI_ISL_10799346	2022-02-06	Servicio Virosis Respiratorias-Departamento Virología-INEI	Instituto Nacional Enfermedades Infecciosas C.G.Malbran	Baumeister E. et al
Argentina/INEI119501/2022	EPI_ISL_10705602	2022-02-08	Servicio Virosis Respiratorias-Departamento Virología-INEI	Instituto Nacional Enfermedades Infecciosas C.G.Malbran	Baumeister E. et al
Argentina/INEI119513/2022	EPI_ISL_10799348	2022-02-15	Servicio Virosis Respiratorias-Departamento Virología-INEI	Instituto Nacional Enfermedades Infecciosas C.G.Malbran	Baumeister E. et al
Argentina/INEI119518/2022	EPI_ISL_10705604	2022-02-10	Servicio Virosis Respiratorias-Departamento Virología-INEI	Instituto Nacional Enfermedades Infecciosas C.G.Malbran	Baumeister E. et al
Argentina/INEI119519/2022	EPI_ISL_10705605	2022-02-10	Servicio Virosis Respiratorias-Departamento Virología-INEI	Instituto Nacional Enfermedades Infecciosas C.G.Malbran	Baumeister E. et al
Argentina/INEI119520/2022	EPI_ISL_10705606	2022-02-10	Servicio Virosis Respiratorias-Departamento Virología-INEI	Instituto Nacional Enfermedades Infecciosas C.G.Malbran	Baumeister E. et al
Argentina/INEI119521/2022	EPI_ISL_10705607	2022-02-07	Servicio Virosis Respiratorias-Departamento Virología-INEI	Instituto Nacional Enfermedades Infecciosas C.G.Malbran	Baumeister E. et al
Argentina/INEI119522/2022	EPI_ISL_10705608	2022-02-07	Servicio Virosis Respiratorias-Departamento Virología-INEI	Instituto Nacional Enfermedades Infecciosas C.G.Malbran	Baumeister E. et al
Argentina/INEI119523/2022	EPI_ISL_10705609	2022-02-10	Servicio Virosis Respiratorias-Departamento Virología-INEI	Instituto Nacional Enfermedades Infecciosas C.G.Malbran	Baumeister E. et al
Argentina/INEI119524/2022	EPI_ISL_10705610	2022-02-10	Servicio Virosis Respiratorias-Departamento Virología-INEI	Instituto Nacional Enfermedades Infecciosas C.G.Malbran	Baumeister E. et al
Argentina/INEI119527/2022	EPI_ISL_10705612	2022-01-31	Servicio Virosis Respiratorias-Departamento Virología-INEI	Instituto Nacional Enfermedades Infecciosas C.G.Malbran	Baumeister E. et al
Argentina/INEI119530/2022	EPI_ISL_10705615	2022-01-24	Servicio Virosis Respiratorias-Departamento Virología-INEI	Instituto Nacional Enfermedades Infecciosas C.G.Malbran	Baumeister E. et al
Argentina/INEI119535/2022	EPI_ISL_10705620	2022-01-25	Servicio Virosis Respiratorias-Departamento Virología-INEI	Instituto Nacional Enfermedades Infecciosas C.G.Malbran	Baumeister E. et al
Argentina/INEI119536/2022	EPI_ISL_10705621	2022-01-27	Servicio Virosis Respiratorias-Departamento Virología-INEI	Instituto Nacional Enfermedades Infecciosas C.G.Malbran	Baumeister E. et al
Argentina/INEI119542/2022	EPI_ISL_10705624	2022-01-31	Servicio Virosis Respiratorias-Departamento Virología-INEI	Instituto Nacional Enfermedades Infecciosas C.G.Malbran	Baumeister E. et al
Argentina/INEI119558/2022	EPI_ISL_10799350	2022-02-08	Servicio Virosis Respiratorias-Departamento Virología-INEI	Instituto Nacional Enfermedades Infecciosas C.G.Malbran	Baumeister E. et al
Argentina/INEI119562/2022	EPI_ISL_10799352	2022-02-13	Servicio Virosis Respiratorias-Departamento Virología-INEI	Instituto Nacional Enfermedades Infecciosas C.G.Malbran	Baumeister E. et al
Argentina/INEI119571/2022	EPI_ISL_10799358	2022-02-09	Servicio Virosis Respiratorias-Departamento Virología-INEI	Instituto Nacional Enfermedades Infecciosas C.G.Malbran	Baumeister E. et al
Argentina/INEI119574/2022	EPI_ISL_10799361	2022-02-09	Servicio Virosis Respiratorias-Departamento Virología-INEI	Instituto Nacional Enfermedades Infecciosas C.G.Malbran	Baumeister E. et al
Argentina/INEI119577/2022	EPI_ISL_10799364	2022-02-02	Servicio Virosis Respiratorias-Departamento Virología-INEI	Instituto Nacional Enfermedades Infecciosas C.G.Malbran	Baumeister E. et al
Argentina/INEI119784/2022	EPI_ISL_10799366	2022-01-16	Servicio Virosis Respiratorias-Departamento Virología-INEI	Instituto Nacional Enfermedades Infecciosas C.G.Malbran	Baumeister E. et al
Argentina/INEI119786/2022	EPI_ISL_10799368	2022-01-26	Servicio Virosis Respiratorias-Departamento Virología-INEI	Instituto Nacional Enfermedades Infecciosas C.G.Malbran	Baumeister E. et al
Argentina/INEI119792/2022	EPI_ISL_10799375	2022-01-04	Servicio Virosis Respiratorias-Departamento Virología-INEI	Instituto Nacional Enfermedades Infecciosas C.G.Malbran	Baumeister E. et al
Argentina/INEI119797/2022	EPI_ISL_10799378	2022-01-19	Servicio Virosis Respiratorias-Departamento Virología-INEI	Instituto Nacional Enfermedades Infecciosas C.G.Malbran	Baumeister E. et al
Argentina/INEI119807/2022	EPI_ISL_10799385	2022-02-17	Servicio Virosis Respiratorias-Departamento Virología-INEI	Instituto Nacional Enfermedades Infecciosas C.G.Malbran	Baumeister E. et al
Argentina/INEI119811/2022	EPI_ISL_10799388	2022-02-05	Servicio Virosis Respiratorias-Departamento Virología-INEI	Instituto Nacional Enfermedades Infecciosas C.G.Malbran	Baumeister E. et al
Argentina/INEI119815/2022	EPI_ISL_10799389	2022-02-08	Servicio Virosis Respiratorias-Departamento Virología-INEI	Instituto Nacional Enfermedades Infecciosas C.G.Malbran	Baumeister E. et al
Argentina/INEI119816/2022	EPI_ISL_12484227	2022-02-05	Servicio Virosis Respiratorias-Departamento Virología-INEI	Instituto Nacional Enfermedades Infecciosas C.G.Malbran	Baumeister E. et al
Argentina/INEI119819/2022	EPI_ISL_10799390	2022-02-10	Servicio Virosis Respiratorias-Departamento Virología-INEI	Instituto Nacional Enfermedades Infecciosas C.G.Malbran	Baumeister E. et al
Argentina/INEI119823/2022	EPI_ISL_10799393	2022-02-07	Servicio Virosis Respiratorias-Departamento Virología-INEI	Instituto Nacional Enfermedades Infecciosas C.G.Malbran	Baumeister E. et al
Argentina/INEI119827/2022	EPI_ISL_10799395	2022-02-09	Servicio Virosis Respiratorias-Departamento Virología-INEI	Instituto Nacional Enfermedades Infecciosas C.G.Malbran	Baumeister E. et al
Argentina/INEI119829/2022	EPI_ISL_10799397	2022-02-08	Servicio Virosis Respiratorias-Departamento Virología-INEI	Instituto Nacional Enfermedades Infecciosas C.G.Malbran	Baumeister E. et al
Argentina/INEI119836/2022	EPI_ISL_10799404	2022-02-18	Servicio Virosis Respiratorias-Departamento Virología-INEI	Instituto Nacional Enfermedades Infecciosas C.G.Malbran	Baumeister E. et al
Argentina/INEI119839/2022	EPI_ISL_10799406	2022-02-21	Servicio Virosis Respiratorias-Departamento Virología-INEI	Instituto Nacional Enfermedades Infecciosas C.G.Malbran	Baumeister E. et al
Argentina/INEI119842/2022	EPI_ISL_10799408	2022-02-20	Servicio Virosis Respiratorias-Departamento Virología-INEI	Instituto Nacional Enfermedades Infecciosas C.G.Malbran	Baumeister E. et al
Argentina/INEI119847/2022	EPI_ISL_10799411	2022-02-15	Servicio Virosis Respiratorias-Departamento Virología-INEI	Instituto Nacional Enfermedades Infecciosas C.G.Malbran	Baumeister E. et al
Argentina/INEI119853/2021	EPI_ISL_11083364	2021-12-31	Servicio Virosis Respiratorias-Departamento Virología-INEI	Instituto Nacional Enfermedades Infecciosas C.G.Malbran	Baumeister E. et al
Argentina/INEI119875/2021	EPI_ISL_11083369	2021-12-26	Servicio Virosis Respiratorias-Departamento Virología-INEI	Instituto Nacional Enfermedades Infecciosas C.G.Malbran	Baumeister E. et al
Argentina/INEI119878/2021	EPI_ISL_11083370	2021-12-28	Servicio Virosis Respiratorias-Departamento Virología-INEI	Instituto Nacional Enfermedades Infecciosas C.G.Malbran	Baumeister E. et al
Argentina/INEI119880/2022	EPI_ISL_11083372	2022-01-13	Servicio Virosis Respiratorias-Departamento Virología-INEI	Instituto Nacional Enfermedades Infecciosas C.G.Malbran	Baumeister E. et al
Argentina/INEI119881/2022	EPI_ISL_11083373	2022-01-31	Servicio Virosis Respiratorias-Departamento Virología-INEI	Instituto Nacional Enfermedades Infecciosas C.G.Malbran	Baumeister E. et al
Argentina/INEI119889/2022	EPI_ISL_11083374	2022-02-18	Servicio Virosis Respiratorias-Departamento Virología-INEI	Instituto Nacional Enfermedades Infecciosas C.G.Malbran	Baumeister E. et al
Argentina/INEI119890/2022	EPI_ISL_11083375	2022-02-16	Servicio Virosis Respiratorias-Departamento Virología-INEI	Instituto Nacional Enfermedades Infecciosas C.G.Malbran	Baumeister E. et al
Argentina/INEI119891/2022	EPI_ISL_11083376	2022-02-20	Servicio Virosis Respiratorias-Departamento Virología-INEI	Instituto Nacional Enfermedades Infecciosas C.G.Malbran	Baumeister E. et al
Argentina/INEI119895/2022	EPI_ISL_11083378	2022-02-14	Servicio Virosis Respiratorias-Departamento Virología-INEI	Instituto Nacional Enfermedades Infecciosas C.G.Malbran	Baumeister E. et al
Argentina/INEI119896/2022	EPI_ISL_11083379	2022-02-14	Servicio Virosis Respiratorias-Departamento Virología-INEI	Instituto Nacional Enfermedades Infecciosas C.G.Malbran	Baumeister E. et al
Argentina/INEI119897/2022	EPI_ISL_11083380	2022-02-15	Servicio Virosis Respiratorias-Departamento Virología-INEI	Instituto Nacional Enfermedades Infecciosas C.G.Malbran	Baumeister E. et al
Argentina/INEI119898/2022	EPI_ISL_11083381	2022-02-15	Servicio Virosis Respiratorias-Departamento Virología-INEI	Instituto Nacional Enfermedades Infecciosas C.G.Malbran	Baumeister E. et al
Argentina/INEI119900/2022	EPI_ISL_11083383	2022-02-17	Servicio Virosis Respiratorias-Departamento Virología-INEI	Instituto Nacional Enfermedades Infecciosas C.G.Malbran	Baumeister E. et al
Argentina/INEI119904/2022	EPI_ISL_11083386	2022-02-17	Servicio Virosis Respiratorias-Departamento Virología-INEI	Instituto Nacional Enfermedades Infecciosas C.G.Malbran	Baumeister E. et al
Argentina/INEI119912/2022	EPI_ISL_10799421	2022-02-14	Servicio Virosis Respiratorias-Departamento Virología-INEI	Instituto Nacional Enfermedades Infecciosas C.G.Malbran	Baumeister E. et al
Argentina/INEI119913/2022	EPI_ISL_10799422	2022-02-15	Servicio Virosis Respiratorias-Departamento Virología-INEI	Instituto Nacional Enfermedades Infecciosas C.G.Malbran	Baumeister E. et al
Argentina/INEI119914/2022	EPI_ISL_10799423	2022-02-16	Servicio Virosis Respiratorias-Departamento Virología-INEI	Instituto Nacional Enfermedades Infecciosas C.G.Malbran	Baumeister E. et al
Argentina/INEI119922/2022	EPI_ISL_11083389	2022-02-09	Servicio Virosis Respiratorias-Departamento Virología-INEI	Instituto Nacional Enfermedades Infecciosas C.G.Malbran	Baumeister E. et al
Argentina/INEI119925/2022	EPI_ISL_11083391	2022-02-09	Servicio Virosis Respiratorias-Departamento Virología-INEI	Instituto Nacional Enfermedades Infecciosas C.G.Malbran	Baumeister E. et al
Argentina/INEI119927/2022	EPI_ISL_11083392	2022-02-10	Servicio Virosis Respiratorias-Departamento Virología-INEI	Instituto Nacional Enfermedades Infecciosas C.G.Malbran	Baumeister E. et al
Argentina/INEI119928/2022	EPI_ISL_11083393	2022-02-13	Servicio Virosis Respiratorias-Departamento Virología-INEI	Instituto Nacional Enfermedades Infecciosas C.G.Malbran	Baumeister E. et al
Argentina/INEI119929/2022	EPI_ISL_11083394	2022-02-13	Servicio Virosis Respiratorias-Departamento Virología-INEI	Instituto Nacional Enfermedades Infecciosas C.G.Malbran	Baumeister E. et al
Argentina/INEI119930/2022	EPI_ISL_11083395	2022-02-20	Servicio Virosis Respiratorias-Departamento Virología-INEI	Instituto Nacional Enfermedades Infecciosas C.G.Malbran	Baumeister E. et al
Argentina/INEI119931/2022	EPI_ISL_11083396	2022-02-09	Servicio Virosis Respiratorias-Departamento Virología-INEI	Instituto Nacional Enfermedades Infecciosas C.G.Malbran	Baumeister E. et al
Argentina/INEI119932/2022	EPI_ISL_11083397	2022-02-16	Servicio Virosis Respiratorias-Departamento Virología-INEI	Instituto Nacional Enfermedades Infecciosas C.G.Malbran	Baumeister E. et al
Argentina/INEI119933/2022	EPI_ISL_11083398	2022-02-16	Servicio Virosis Respiratorias-Departamento Virología-INEI	Instituto Nacional Enfermedades Infecciosas C.G.Malbran	Baumeister E. et al
Argentina/INEI119935/2022	EPI_ISL_11083400	2022-02-16	Servicio Virosis Respiratorias-Departamento Virología-INEI	Instituto Nacional Enfermedades Infecciosas C.G.Malbran	Baumeister E. et al
Argentina/INEI119936/2022	EPI_ISL_11083401	2022-02-16	Servicio Virosis Respiratorias-Departamento Virología-INEI	Instituto Nacional Enfermedades Infecciosas C.G.Malbran	Baumeister E. et al
Argentina/INEI119937/2022	EPI_ISL_11083402	2022-02-16	Servicio Virosis Respiratorias-Departamento Virología-INEI	Instituto Nacional Enfermedades Infecciosas C.G.Malbran	Baumeister E. et al
Argentina/INEI119938/2022	EPI_ISL_11083403	2022-02-16	Servicio Virosis Respiratorias-Departamento Virología-INEI	Instituto Nacional Enfermedades Infecciosas C.G.Malbran	Baumeister E. et al
Argentina/INEI119939/2022	EPI_ISL_11083404	2022-02-16	Servicio Virosis Respiratorias-Departamento Virología-INEI	Instituto Nacional Enfermedades Infecciosas C.G.Malbran	Baumeister E. et al
Argentina/INEI119940/2022	EPI_ISL_11083406	2022-02-16	Servicio Virosis Respiratorias-Departamento Virología-INEI	Instituto Nacional Enfermedades Infecciosas C.G.Malbran	Baumeister E. et al
Argentina/INEI119941/2022	EPI_ISL_11083407	2022-02-16	Servicio Virosis Respiratorias-Departamento Virología-INEI	Instituto Nacional Enfermedades Infecciosas C.G.Malbran	Baumeister E. et al
Argentina/INEI119942/2022	EPI_ISL_11083408	2022-02-16	Servicio Virosis Respiratorias-Departamento Virología-INEI	Instituto Nacional Enfermedades Infecciosas C.G.Malbran	Baumeister E. et al
Argentina/INEI119943/2022	EPI_ISL_11083409	2022-02-18	Servicio Virosis Respiratorias-Departamento Virología-INEI	Instituto Nacional Enfermedades Infecciosas C.G.Malbran	Baumeister E. et al
Argentina/INEI119944/2022	EPI_ISL_11083410	2022-02-19	Servicio Virosis Respiratorias-Departamento Virología-INEI	Instituto Nacional Enfermedades Infecciosas C.G.Malbran	Baumeister E. et al
Argentina/INEI119945/2022	EPI_ISL_11083411	2022-02-19	Servicio Virosis Respiratorias-Departamento Virología-INEI	Instituto Nacional Enfermedades Infecciosas C.G.Malbran	Baumeister E. et al
Argentina/INEI119948/2022	EPI_ISL_11083414	2022-02-19	Servicio Virosis Respiratorias-Departamento Virología-INEI	Instituto Nacional Enfermedades Infecciosas C.G.Malbran	Baumeister E. et al
Argentina/INEI119949/2022	EPI_ISL_11083415	2022-02-20	Servicio Virosis Respiratorias-Departamento Virología-INEI	Instituto Nacional Enfermedades Infecciosas C.G.Malbran	Baumeister E. et al
Argentina/INEI119950/2022	EPI_ISL_11083416	2022-02-20	Servicio Virosis Respiratorias-Departamento Virología-INEI	Instituto Nacional Enfermedades Infecciosas C.G.Malbran	Baumeister E. et al
Argentina/INEI119951/2022	EPI_ISL_11083417	2022-02-20	Servicio Virosis Respiratorias-Departamento Virología-INEI	Instituto Nacional Enfermedades Infecciosas C.G.Malbran	Baumeister E. et al
Argentina/INEI119952/2022	EPI_ISL_11083418	2022-02-21	Servicio Virosis Respiratorias-Departamento Virología-INEI	Instituto Nacional Enfermedades Infecciosas C.G.Malbran	Baumeister E. et al
Argentina/INEI119953/2022	EPI_ISL_11083419	2022-02-21	Servicio Virosis Respiratorias-Departamento Virología-INEI	Instituto Nacional Enfermedades Infecciosas C.G.Malbran	Baumeister E. et al
Argentina/INEI119954/2022	EPI_ISL_11083420	2022-02-21	Servicio Virosis Respiratorias-Departamento Virología-INEI	Instituto Nacional Enfermedades Infecciosas C.G.Malbran	Baumeister E. et al
Argentina/INEI119955/2022	EPI_ISL_11083421	2022-02-22	Servicio Virosis Respiratorias-Departamento Virología-INEI	Instituto Nacional Enfermedades Infecciosas C.G.Malbran	Baumeister E. et al
Argentina/INEI119957/2022	EPI_ISL_11083422	2022-02-22	Servicio Virosis Respiratorias-Departamento Virología-INEI	Instituto Nacional Enfermedades Infecciosas C.G.Malbran	Baumeister E. et al
Argentina/INEI119958/2022	EPI_ISL_11083423	2022-02-21	Servicio Virosis Respiratorias-Departamento Virología-INEI	Instituto Nacional Enfermedades Infecciosas C.G.Malbran	Baumeister E. et al
Argentina/INEI119959/2022	EPI_ISL_11083424	2022-02-23	Servicio Virosis Respiratorias-Departamento Virología-INEI	Instituto Nacional Enfermedades Infecciosas C.G.Malbran	Baumeister E. et al
Argentina/INEI119960/2022	EPI_ISL_11083425	2022-02-23	Servicio Virosis Respiratorias-Departamento Virología-INEI	Instituto Nacional Enfermedades Infecciosas C.G.Malbran	Baumeister E. et al
Argentina/INEI119961/2022	EPI_ISL_11083426	2022-03-01	Servicio Virosis Respiratorias-Departamento Virología-INEI	Instituto Nacional Enfermedades Infecciosas C.G.Malbran	Baumeister E. et al
Argentina/INEI119962/2022	EPI_ISL_11083427	2022-02-10	Servicio Virosis Respiratorias-Departamento Virología-INEI	Instituto Nacional Enfermedades Infecciosas C.G.Malbran	Baumeister E. et al
Argentina/INEI119964/2022	EPI_ISL_11083429	2022-02-15	Servicio Virosis Respiratorias-Departamento Virología-INEI	Instituto Nacional Enfermedades Infecciosas C.G.Malbran	Baumeister E. et al
Argentina/INEI119972/2022	EPI_ISL_11083435	2022-02-28	Servicio Virosis Respiratorias-Departamento Virología-INEI	Instituto Nacional Enfermedades Infecciosas C.G.Malbran	Baumeister E. et al
Argentina/INEI119974/2022	EPI_ISL_11083437	2022-02-23	Servicio Virosis Respiratorias-Departamento Virología-INEI	Instituto Nacional Enfermedades Infecciosas C.G.Malbran	Baumeister E. et al
Argentina/INEI119975/2022	EPI_ISL_11083438	2022-02-17	Servicio Virosis Respiratorias-Departamento Virología-INEI	Instituto Nacional Enfermedades Infecciosas C.G.Malbran	Baumeister E. et al
Argentina/INEI119977/2022	EPI_ISL_11083440	2022-02-21	Servicio Virosis Respiratorias-Departamento Virología-INEI	Instituto Nacional Enfermedades Infecciosas C.G.Malbran	Baumeister E. et al
Argentina/INEI119978/2022	EPI_ISL_11083441	2022-02-22	Servicio Virosis Respiratorias-Departamento Virología-INEI	Instituto Nacional Enfermedades Infecciosas C.G.Malbran	Baumeister E. et al
Argentina/INEI119979/2022	EPI_ISL_11083442	2022-02-23	Servicio Virosis Respiratorias-Departamento Virología-INEI	Instituto Nacional Enfermedades Infecciosas C.G.Malbran	Baumeister E. et al
Argentina/INEI119988/2022	EPI_ISL_11083446	2022-02-24	Servicio Virosis Respiratorias-Departamento Virología-INEI	Instituto Nacional Enfermedades Infecciosas C.G.Malbran	Baumeister E. et al
Argentina/INEI119992/2022	EPI_ISL_11083450	2022-02-13	Servicio Virosis Respiratorias-Departamento Virología-INEI	Instituto Nacional Enfermedades Infecciosas C.G.Malbran	Baumeister E. et al
Argentina/INEI119996/2022	EPI_ISL_11083453	2022-02-24	Servicio Virosis Respiratorias-Departamento Virología-INEI	Instituto Nacional Enfermedades Infecciosas C.G.Malbran	Baumeister E. et al
Argentina/INEI119997/2022	EPI_ISL_11083454	2022-02-25	Servicio Virosis Respiratorias-Departamento Virología-INEI	Instituto Nacional Enfermedades Infecciosas C.G.Malbran	Baumeister E. et al
Argentina/INEI120004/2022	EPI_ISL_11083460	2022-03-03	Servicio Virosis Respiratorias-Departamento Virología-INEI	Instituto Nacional Enfermedades Infecciosas C.G.Malbran	Baumeister E. et al
Argentina/INEI120005/2022	EPI_ISL_11083461	2022-02-19	Servicio Virosis Respiratorias-Departamento Virología-INEI	Instituto Nacional Enfermedades Infecciosas C.G.Malbran	Baumeister E. et al
Argentina/INEI120007/2022	EPI_ISL_11083462	2022-02-26	Servicio Virosis Respiratorias-Departamento Virología-INEI	Instituto Nacional Enfermedades Infecciosas C.G.Malbran	Baumeister E. et al
Argentina/INEI120008/2022	EPI_ISL_11083463	2022-02-26	Servicio Virosis Respiratorias-Departamento Virología-INEI	Instituto Nacional Enfermedades Infecciosas C.G.Malbran	Baumeister E. et al
Argentina/INEI120019/2022	EPI_ISL_11083464	2022-02-25	Servicio Virosis Respiratorias-Departamento Virología-INEI	Instituto Nacional Enfermedades Infecciosas C.G.Malbran	Baumeister E. et al
Argentina/INEI120020/2022	EPI_ISL_11083465	2022-02-14	Servicio Virosis Respiratorias-Departamento Virología-INEI	Instituto Nacional Enfermedades Infecciosas C.G.Malbran	Baumeister E. et al
Argentina/INEI120021/2022	EPI_ISL_11083466	2022-03-03	Servicio Virosis Respiratorias-Departamento Virología-INEI	Instituto Nacional Enfermedades Infecciosas C.G.Malbran	Baumeister E. et al
Argentina/INEI120059/2022	EPI_ISL_12484231	2022-03-03	Servicio Virosis Respiratorias-Departamento Virología-INEI	Instituto Nacional Enfermedades Infecciosas C.G.Malbran	Baumeister E. et al
Argentina/INEI120063/2022	EPI_ISL_12484234	2022-03-04	Servicio Virosis Respiratorias-Departamento Virología-INEI	Instituto Nacional Enfermedades Infecciosas C.G.Malbran	Baumeister E. et al
Argentina/INEI120067/2022	EPI_ISL_12484235	2022-02-28	Servicio Virosis Respiratorias-Departamento Virología-INEI	Instituto Nacional Enfermedades Infecciosas C.G.Malbran	Baumeister E. et al
Argentina/INEI120069/2022	EPI_ISL_12484236	2022-03-04	Servicio Virosis Respiratorias-Departamento Virología-INEI	Instituto Nacional Enfermedades Infecciosas C.G.Malbran	Baumeister E. et al
Argentina/INEI120070/2022	EPI_ISL_12484237	2022-03-04	Servicio Virosis Respiratorias-Departamento Virología-INEI	Instituto Nacional Enfermedades Infecciosas C.G.Malbran	Baumeister E. et al
Argentina/INEI120071/2022	EPI_ISL_12484238	2022-03-05	Servicio Virosis Respiratorias-Departamento Virología-INEI	Instituto Nacional Enfermedades Infecciosas C.G.Malbran	Baumeister E. et al
Argentina/INEI120082/2022	EPI_ISL_12484240	2022-03-02	Servicio Virosis Respiratorias-Departamento Virología-INEI	Instituto Nacional Enfermedades Infecciosas C.G.Malbran	Baumeister E. et al
Argentina/INEI120083/2022	EPI_ISL_12484241	2022-03-03	Servicio Virosis Respiratorias-Departamento Virología-INEI	Instituto Nacional Enfermedades Infecciosas C.G.Malbran	Baumeister E. et al
Argentina/INEI120085/2022	EPI_ISL_12484242	2022-03-03	Servicio Virosis Respiratorias-Departamento Virología-INEI	Instituto Nacional Enfermedades Infecciosas C.G.Malbran	Baumeister E. et al
Argentina/INEI120087/2022	EPI_ISL_12484243	2022-03-04	Servicio Virosis Respiratorias-Departamento Virología-INEI	Instituto Nacional Enfermedades Infecciosas C.G.Malbran	Baumeister E. et al
Argentina/INEI120088/2022	EPI_ISL_12484244	2022-03-04	Servicio Virosis Respiratorias-Departamento Virología-INEI	Instituto Nacional Enfermedades Infecciosas C.G.Malbran	Baumeister E. et al
Argentina/INEI120090/2022	EPI_ISL_12484245	2022-03-04	Servicio Virosis Respiratorias-Departamento Virología-INEI	Instituto Nacional Enfermedades Infecciosas C.G.Malbran	Baumeister E. et al
Argentina/INEI120091/2022	EPI_ISL_12484246	2022-03-05	Servicio Virosis Respiratorias-Departamento Virología-INEI	Instituto Nacional Enfermedades Infecciosas C.G.Malbran	Baumeister E. et al
Argentina/INEI120095/2022	EPI_ISL_12484249	2022-03-07	Servicio Virosis Respiratorias-Departamento Virología-INEI	Instituto Nacional Enfermedades Infecciosas C.G.Malbran	Baumeister E. et al
Argentina/INEI120096/2022	EPI_ISL_12484250	2022-03-07	Servicio Virosis Respiratorias-Departamento Virología-INEI	Instituto Nacional Enfermedades Infecciosas C.G.Malbran	Baumeister E. et al
Argentina/INEI120099/2022	EPI_ISL_12484251	2022-03-07	Servicio Virosis Respiratorias-Departamento Virología-INEI	Instituto Nacional Enfermedades Infecciosas C.G.Malbran	Baumeister E. et al
Argentina/INEI120100/2022	EPI_ISL_12484252	2022-03-07	Servicio Virosis Respiratorias-Departamento Virología-INEI	Instituto Nacional Enfermedades Infecciosas C.G.Malbran	Baumeister E. et al
Argentina/INEI120101/2022	EPI_ISL_12484253	2022-03-07	Servicio Virosis Respiratorias-Departamento Virología-INEI	Instituto Nacional Enfermedades Infecciosas C.G.Malbran	Baumeister E. et al
Argentina/INEI120102/2022	EPI_ISL_12484254	2022-03-07	Servicio Virosis Respiratorias-Departamento Virología-INEI	Instituto Nacional Enfermedades Infecciosas C.G.Malbran	Baumeister E. et al
Argentina/INEI120103/2022	EPI_ISL_12484255	2022-03-07	Servicio Virosis Respiratorias-Departamento Virología-INEI	Instituto Nacional Enfermedades Infecciosas C.G.Malbran	Baumeister E. et al
Argentina/INEI120104/2022	EPI_ISL_12484256	2022-03-07	Servicio Virosis Respiratorias-Departamento Virología-INEI	Instituto Nacional Enfermedades Infecciosas C.G.Malbran	Baumeister E. et al
Argentina/INEI120105/2022	EPI_ISL_12484257	2022-03-08	Servicio Virosis Respiratorias-Departamento Virología-INEI	Instituto Nacional Enfermedades Infecciosas C.G.Malbran	Baumeister E. et al
Argentina/INEI120106/2022	EPI_ISL_12484258	2022-03-09	Servicio Virosis Respiratorias-Departamento Virología-INEI	Instituto Nacional Enfermedades Infecciosas C.G.Malbran	Baumeister E. et al
Argentina/INEI120107/2022	EPI_ISL_12484259	2022-03-11	Servicio Virosis Respiratorias-Departamento Virología-INEI	Instituto Nacional Enfermedades Infecciosas C.G.Malbran	Baumeister E. et al
Argentina/INEI120111/2022	EPI_ISL_12484262	2022-03-13	Servicio Virosis Respiratorias-Departamento Virología-INEI	Instituto Nacional Enfermedades Infecciosas C.G.Malbran	Baumeister E. et al
Argentina/INEI120113/2022	EPI_ISL_12484264	2022-03-14	Servicio Virosis Respiratorias-Departamento Virología-INEI	Instituto Nacional Enfermedades Infecciosas C.G.Malbran	Baumeister E. et al
Argentina/INEI120115/2022	EPI_ISL_12484265	2022-03-14	Servicio Virosis Respiratorias-Departamento Virología-INEI	Instituto Nacional Enfermedades Infecciosas C.G.Malbran	Baumeister E. et al
Argentina/INEI120116/2022	EPI_ISL_12484266	2022-03-14	Servicio Virosis Respiratorias-Departamento Virología-INEI	Instituto Nacional Enfermedades Infecciosas C.G.Malbran	Baumeister E. et al
Argentina/INEI120138/2022	EPI_ISL_12484276	2022-02-06	Servicio Virosis Respiratorias-Departamento Virología-INEI	Instituto Nacional Enfermedades Infecciosas C.G.Malbran	Baumeister E. et al
Argentina/INEI120141/2022	EPI_ISL_12484277	2022-02-16	Servicio Virosis Respiratorias-Departamento Virología-INEI	Instituto Nacional Enfermedades Infecciosas C.G.Malbran	Baumeister E. et al
Argentina/INEI120148/2022	EPI_ISL_12484282	2022-02-15	Servicio Virosis Respiratorias-Departamento Virología-INEI	Instituto Nacional Enfermedades Infecciosas C.G.Malbran	Baumeister E. et al
Argentina/INEI120152/2022	EPI_ISL_12484285	2022-02-15	Servicio Virosis Respiratorias-Departamento Virología-INEI	Instituto Nacional Enfermedades Infecciosas C.G.Malbran	Baumeister E. et al
Argentina/INEI120156/2022	EPI_ISL_12484288	2022-02-21	Servicio Virosis Respiratorias-Departamento Virología-INEI	Instituto Nacional Enfermedades Infecciosas C.G.Malbran	Baumeister E. et al
Argentina/INEI120160/2022	EPI_ISL_12484292	2022-02-22	Servicio Virosis Respiratorias-Departamento Virología-INEI	Instituto Nacional Enfermedades Infecciosas C.G.Malbran	Baumeister E. et al
Argentina/INEI120162/2022	EPI_ISL_12484294	2022-03-02	Servicio Virosis Respiratorias-Departamento Virología-INEI	Instituto Nacional Enfermedades Infecciosas C.G.Malbran	Baumeister E. et al
Argentina/INEI120165/2022	EPI_ISL_12484297	2022-03-18	Servicio Virosis Respiratorias-Departamento Virología-INEI	Instituto Nacional Enfermedades Infecciosas C.G.Malbran	Baumeister E. et al
Argentina/INEI120166/2022	EPI_ISL_12484298	2022-03-17	Servicio Virosis Respiratorias-Departamento Virología-INEI	Instituto Nacional Enfermedades Infecciosas C.G.Malbran	Baumeister E. et al
Argentina/INEI120167/2022	EPI_ISL_12484299	2022-03-14	Servicio Virosis Respiratorias-Departamento Virología-INEI	Instituto Nacional Enfermedades Infecciosas C.G.Malbran	Baumeister E. et al
Argentina/INEI120170/2022	EPI_ISL_12484301	2022-03-16	Servicio Virosis Respiratorias-Departamento Virología-INEI	Instituto Nacional Enfermedades Infecciosas C.G.Malbran	Baumeister E. et al
Argentina/INEI120174/2022	EPI_ISL_12484304	2022-03-02	Servicio Virosis Respiratorias-Departamento Virología-INEI	Instituto Nacional Enfermedades Infecciosas C.G.Malbran	Baumeister E. et al
Argentina/INEI120175/2022	EPI_ISL_12484305	2022-03-03	Servicio Virosis Respiratorias-Departamento Virología-INEI	Instituto Nacional Enfermedades Infecciosas C.G.Malbran	Baumeister E. et al
Argentina/INEI120176/2022	EPI_ISL_12484306	2022-03-03	Servicio Virosis Respiratorias-Departamento Virología-INEI	Instituto Nacional Enfermedades Infecciosas C.G.Malbran	Baumeister E. et al
Argentina/INEI120177/2022	EPI_ISL_12484307	2022-02-03	Servicio Virosis Respiratorias-Departamento Virología-INEI	Instituto Nacional Enfermedades Infecciosas C.G.Malbran	Baumeister E. et al
Argentina/INEI120179/2022	EPI_ISL_12484308	2022-03-10	Servicio Virosis Respiratorias-Departamento Virología-INEI	Instituto Nacional Enfermedades Infecciosas C.G.Malbran	Baumeister E. et al
Argentina/INEI120185/2022	EPI_ISL_12484309	2022-03-07	Servicio Virosis Respiratorias-Departamento Virología-INEI	Instituto Nacional Enfermedades Infecciosas C.G.Malbran	Baumeister E. et al
Argentina/INEI120186/2022	EPI_ISL_12484310	2022-03-14	Servicio Virosis Respiratorias-Departamento Virología-INEI	Instituto Nacional Enfermedades Infecciosas C.G.Malbran	Baumeister E. et al
Argentina/INEI120189/2022	EPI_ISL_12484313	2022-03-11	Servicio Virosis Respiratorias-Departamento Virología-INEI	Instituto Nacional Enfermedades Infecciosas C.G.Malbran	Baumeister E. et al
Argentina/INEI120191/2022	EPI_ISL_12484315	2022-03-14	Servicio Virosis Respiratorias-Departamento Virología-INEI	Instituto Nacional Enfermedades Infecciosas C.G.Malbran	Baumeister E. et al
Argentina/INEI120208/2022	EPI_ISL_12484316	2022-03-08	Servicio Virosis Respiratorias-Departamento Virología-INEI	Instituto Nacional Enfermedades Infecciosas C.G.Malbran	Baumeister E. et al
Argentina/INEI120210/2022	EPI_ISL_12484318	2022-03-09	Servicio Virosis Respiratorias-Departamento Virología-INEI	Instituto Nacional Enfermedades Infecciosas C.G.Malbran	Baumeister E. et al
Argentina/INEI120211/2022	EPI_ISL_12484319	2022-03-09	Servicio Virosis Respiratorias-Departamento Virología-INEI	Instituto Nacional Enfermedades Infecciosas C.G.Malbran	Baumeister E. et al
Argentina/INEI120234/2022	EPI_ISL_12484321	2022-03-14	Servicio Virosis Respiratorias-Departamento Virología-INEI	Instituto Nacional Enfermedades Infecciosas C.G.Malbran	Baumeister E. et al
Argentina/INEI120237/2022	EPI_ISL_12484322	2022-03-16	Servicio Virosis Respiratorias-Departamento Virología-INEI	Instituto Nacional Enfermedades Infecciosas C.G.Malbran	Baumeister E. et al
Argentina/INEI120238/2022	EPI_ISL_12484323	2022-03-20	Servicio Virosis Respiratorias-Departamento Virología-INEI	Instituto Nacional Enfermedades Infecciosas C.G.Malbran	Baumeister E. et al
Argentina/INEI120241/2022	EPI_ISL_12484324	2022-03-21	Servicio Virosis Respiratorias-Departamento Virología-INEI	Instituto Nacional Enfermedades Infecciosas C.G.Malbran	Baumeister E. et al
Argentina/INEI120242/2022	EPI_ISL_12484325	2022-03-21	Servicio Virosis Respiratorias-Departamento Virología-INEI	Instituto Nacional Enfermedades Infecciosas C.G.Malbran	Baumeister E. et al
Argentina/INEI120248/2022	EPI_ISL_12484328	2022-04-04	Servicio Virosis Respiratorias-Departamento Virología-INEI	Instituto Nacional Enfermedades Infecciosas C.G.Malbran	Baumeister E. et al
Argentina/INEI120257/2022	EPI_ISL_12484329	2022-04-06	Servicio Virosis Respiratorias-Departamento Virología-INEI	Instituto Nacional Enfermedades Infecciosas C.G.Malbran	Baumeister E. et al
Argentina/INEI120266/2022	EPI_ISL_12484333	2022-03-27	Servicio Virosis Respiratorias-Departamento Virología-INEI	Instituto Nacional Enfermedades Infecciosas C.G.Malbran	Baumeister E. et al
Argentina/INEI120284/2022	EPI_ISL_12374581	2022-03-30	Servicio Virosis Respiratorias-Departamento Virología-INEI	Instituto Nacional Enfermedades Infecciosas C.G.Malbran	Baumeister E. et al
Argentina/INEI120304/2022	EPI_ISL_12484338	2022-04-16	Servicio Virosis Respiratorias-Departamento Virología-INEI	Instituto Nacional Enfermedades Infecciosas C.G.Malbran	Baumeister E. et al
Argentina/PAIS-A1255/2021	EPI_ISL_8203667	2021-12-18	Laboratorio de Biología molecular del Hospital General de Agudos Dr. Carlos G. Durand	Área de Secuenciación del Laboratorio de Virología del Hospital de Niños Dr. Ricardo Gutierrez on behalf of 'Proyecto Argentino Interinstitucional de genomica de SARS-CoV-2' (PAIS Consortium)	Clara Theaux et al
Argentina/PAIS-A1260/2021	EPI_ISL_12420877	2021-12-22	Laboratorio de Biología Molecular Bolívar (LABBO)	Área de Secuenciación del Laboratorio de Virología del Hospital de Niños Dr. Ricardo Gutierrez on behalf of 'Proyecto Argentino Interinstitucional de genomica de SARS-CoV-2' (PAIS Consortium)	María Estela Jofré et al
Argentina/PAIS-A1261/2021	EPI_ISL_12420878	2021-12-23	Laboratorio de Biología Molecular Bolívar (LABBO)	Área de Secuenciación del Laboratorio de Virología del Hospital de Niños Dr. Ricardo Gutierrez on behalf of 'Proyecto Argentino Interinstitucional de genomica de SARS-CoV-2' (PAIS Consortium)	María Estela Jofré et al
Argentina/PAIS-A1263/2021	EPI_ISL_12420879	2021-12-22	Hospital "Ramón Santamarina"	Área de Secuenciación del Laboratorio de Virología del Hospital de Niños Dr. Ricardo Gutierrez on behalf of 'Proyecto Argentino Interinstitucional de genomica de SARS-CoV-2' (PAIS Consortium)	Acuña et al
Argentina/PAIS-A1267/2021	EPI_ISL_12420880	2021-12-23	Laboratorio de Biología Molecular UFU y Epidemiología Hospital Pedro de Elizalde	Área de Secuenciación del Laboratorio de Virología del Hospital de Niños Dr. Ricardo Gutierrez on behalf of 'Proyecto Argentino Interinstitucional de genomica de SARS-CoV-2' (PAIS Consortium)	Javier Indart et al
Argentina/PAIS-A1272/2021	EPI_ISL_12420882	2021-12-27	Laboratorio de salud pública, Facultad de Ciencias Exactas, Universidad Nacional de La Plata	Área de Secuenciación del Laboratorio de Virología del Hospital de Niños Dr. Ricardo Gutierrez on behalf of 'Proyecto Argentino Interinstitucional de genomica de SARS-CoV-2' (PAIS Consortium)	Rosana Isabel Toro et al
Argentina/PAIS-A1273/2021	EPI_ISL_12422390	2021-12-27	Hospital General de Agudos Dr. Cosme Argerich	Área de Secuenciación del Laboratorio de Virología del Hospital de Niños Dr. Ricardo Gutierrez on behalf of 'Proyecto Argentino Interinstitucional de genomica de SARS-CoV-2' (PAIS Consortium)	Marcia Pozzati et al
Argentina/PAIS-A1277/2022	EPI_ISL_12420884	2022-01-01	Plataforma de Servicios Biotecnólogicos: UTTIPP/PSB , Universidad Nacional de Quilmes.	Área de Secuenciación del Laboratorio de Virología del Hospital de Niños Dr. Ricardo Gutierrez on behalf of 'Proyecto Argentino Interinstitucional de genomica de SARS-CoV-2' (PAIS Consortium)	Hernán Farina et al
Argentina/PAIS-A1278/2022	EPI_ISL_12420885	2022-01-04	Laboratorio de Biología molecular del Hospital General de Agudos Dr. Carlos G. Durand	Área de Secuenciación del Laboratorio de Virología del Hospital de Niños Dr. Ricardo Gutierrez on behalf of 'Proyecto Argentino Interinstitucional de genomica de SARS-CoV-2' (PAIS Consortium)	Clara Theaux et al
Argentina/PAIS-A1279/2022	EPI_ISL_12422380	2022-01-05	Laboratorio del Hospital Interzonal General de Agudos “Evita”	Área de Secuenciación del Laboratorio de Virología del Hospital de Niños Dr. Ricardo Gutierrez on behalf of 'Proyecto Argentino Interinstitucional de genomica de SARS-CoV-2' (PAIS Consortium)	Isabel Desimone et al
Argentina/PAIS-A1288/2022	EPI_ISL_12422395	2022-01-20	Laboratorio de Virologia del Hospital de Niños Dr Ricardo Gutierrez	Área de Secuenciación del Laboratorio de Virología del Hospital de Niños Dr. Ricardo Gutierrez on behalf of 'Proyecto Argentino Interinstitucional de genomica de SARS-CoV-2' (PAIS Consortium)	Alicia Mistchenko et al
Argentina/PAIS-A1292/2022	EPI_ISL_12420887	2022-01-20	Laboratorio de Biología Molecular UFU y Epidemiología Hospital Pedro de Elizalde	Área de Secuenciación del Laboratorio de Virología del Hospital de Niños Dr. Ricardo Gutierrez on behalf of 'Proyecto Argentino Interinstitucional de genomica de SARS-CoV-2' (PAIS Consortium)	Javier Indart et al
Argentina/PAIS-A1295/2022	EPI_ISL_12420889	2022-01-17	Laboratorio de salud pública, Facultad de Ciencias Exactas, Universidad Nacional de La Plata	Área de Secuenciación del Laboratorio de Virología del Hospital de Niños Dr. Ricardo Gutierrez on behalf of 'Proyecto Argentino Interinstitucional de genomica de SARS-CoV-2' (PAIS Consortium)	Rosana Isabel Toro et al
Argentina/PAIS-A1297/2022	EPI_ISL_12422399	2022-01-24	Hospital "Ramón Santamarina"	Área de Secuenciación del Laboratorio de Virología del Hospital de Niños Dr. Ricardo Gutierrez on behalf of 'Proyecto Argentino Interinstitucional de genomica de SARS-CoV-2' (PAIS Consortium)	Acuña et al
Argentina/PAIS-A1299/2022	EPI_ISL_12422401	2022-01-24	Laboratorio de salud pública, Facultad de Ciencias Exactas, Universidad Nacional de La Plata	Área de Secuenciación del Laboratorio de Virología del Hospital de Niños Dr. Ricardo Gutierrez on behalf of 'Proyecto Argentino Interinstitucional de genomica de SARS-CoV-2' (PAIS Consortium)	Rosana Isabel Toro et al
Argentina/PAIS-A1300/2022	EPI_ISL_12422402	2022-01-19	Laboratorio del Hospital Interzonal General de Agudos “Evita”	Área de Secuenciación del Laboratorio de Virología del Hospital de Niños Dr. Ricardo Gutierrez on behalf of 'Proyecto Argentino Interinstitucional de genomica de SARS-CoV-2' (PAIS Consortium)	Isabel Desimone et al
Argentina/PAIS-A1303/2022	EPI_ISL_12420891	2022-01-26	Laboratorio de salud pública, Facultad de Ciencias Exactas, Universidad Nacional de La Plata	Área de Secuenciación del Laboratorio de Virología del Hospital de Niños Dr. Ricardo Gutierrez on behalf of 'Proyecto Argentino Interinstitucional de genomica de SARS-CoV-2' (PAIS Consortium)	Rosana Isabel Toro et al
Argentina/PAIS-A1306/2022	EPI_ISL_12422381	2022-01-27	Laboratorio del Hospital Interzonal General de Agudos “Evita”	Área de Secuenciación del Laboratorio de Virología del Hospital de Niños Dr. Ricardo Gutierrez on behalf of 'Proyecto Argentino Interinstitucional de genomica de SARS-CoV-2' (PAIS Consortium)	Isabel Desimone et al
Argentina/PAIS-A1308/2022	EPI_ISL_12422405	2022-01-26	Hospital Alemán	Área de Secuenciación del Laboratorio de Virología del Hospital de Niños Dr. Ricardo Gutierrez on behalf of 'Proyecto Argentino Interinstitucional de genomica de SARS-CoV-2' (PAIS Consortium)	Eugenia Ibañez et al
Argentina/PAIS-A1310/2022	EPI_ISL_12420893	2022-01-24	Hospital Alemán	Área de Secuenciación del Laboratorio de Virología del Hospital de Niños Dr. Ricardo Gutierrez on behalf of 'Proyecto Argentino Interinstitucional de genomica de SARS-CoV-2' (PAIS Consortium)	Eugenia Ibañez et al
Argentina/PAIS-A1313/2022	EPI_ISL_12420895	2022-02-01	Laboratorio de Virologia del Hospital de Niños Dr Ricardo Gutierrez	Área de Secuenciación del Laboratorio de Virología del Hospital de Niños Dr. Ricardo Gutierrez on behalf of 'Proyecto Argentino Interinstitucional de genomica de SARS-CoV-2' (PAIS Consortium)	Alicia Mistchenko et al
Argentina/PAIS-A1316/2022	EPI_ISL_12422408	2022-02-01	Hospital General de Agudos Dr. Cosme Argerich	Área de Secuenciación del Laboratorio de Virología del Hospital de Niños Dr. Ricardo Gutierrez on behalf of 'Proyecto Argentino Interinstitucional de genomica de SARS-CoV-2' (PAIS Consortium)	Marcia Pozzati et al
Argentina/PAIS-A1320/2022	EPI_ISL_12422382	2022-01-25	Hospital General de Agudos Dr. Cosme Argerich	Área de Secuenciación del Laboratorio de Virología del Hospital de Niños Dr. Ricardo Gutierrez on behalf of 'Proyecto Argentino Interinstitucional de genomica de SARS-CoV-2' (PAIS Consortium)	Marcia Pozzati et al
Argentina/PAIS-A1324/2021	EPI_ISL_12422412	2021-12-22	Laboratorio de Biología molecular del Hospital General de Agudos Dr. Carlos G. Durand	Área de Secuenciación del Laboratorio de Virología del Hospital de Niños Dr. Ricardo Gutierrez on behalf of 'Proyecto Argentino Interinstitucional de genomica de SARS-CoV-2' (PAIS Consortium)	Clara Theaux et al
Argentina/PAIS-A1326/2022	EPI_ISL_12420898	2022-02-06	Hospital Alemán	Área de Secuenciación del Laboratorio de Virología del Hospital de Niños Dr. Ricardo Gutierrez on behalf of 'Proyecto Argentino Interinstitucional de genomica de SARS-CoV-2' (PAIS Consortium)	Eugenia Ibañez et al
Argentina/PAIS-A1328/2022	EPI_ISL_12422414	2022-02-10	Hospital Alemán	Área de Secuenciación del Laboratorio de Virología del Hospital de Niños Dr. Ricardo Gutierrez on behalf of 'Proyecto Argentino Interinstitucional de genomica de SARS-CoV-2' (PAIS Consortium)	Eugenia Ibañez et al
Argentina/PAIS-A1334/2022	EPI_ISL_12420900	2022-02-10	Laboratorio del Hospital Interzonal General de Agudos “Evita”	Área de Secuenciación del Laboratorio de Virología del Hospital de Niños Dr. Ricardo Gutierrez on behalf of 'Proyecto Argentino Interinstitucional de genomica de SARS-CoV-2' (PAIS Consortium)	Isabel Desimone et al
Argentina/PAIS-A1338/2022	EPI_ISL_12422416	2022-02-18	Instituto Nacional de Epidemiología "Dr. Jara"	Área de Secuenciación del Laboratorio de Virología del Hospital de Niños Dr. Ricardo Gutierrez on behalf of 'Proyecto Argentino Interinstitucional de genomica de SARS-CoV-2' (PAIS Consortium)	Irene Pagano et al
Argentina/PAIS-A1344/2022	EPI_ISL_12420904	2022-02-19	Laboratorio de Virologia del Hospital de Niños Dr Ricardo Gutierrez	Área de Secuenciación del Laboratorio de Virología del Hospital de Niños Dr. Ricardo Gutierrez on behalf of 'Proyecto Argentino Interinstitucional de genomica de SARS-CoV-2' (PAIS Consortium)	Alicia Mistchenko et al
Argentina/PAIS-A1345/2022	EPI_ISL_12422418	2022-02-11	Laboratorio de Virologia del Hospital de Niños Dr Ricardo Gutierrez	Área de Secuenciación del Laboratorio de Virología del Hospital de Niños Dr. Ricardo Gutierrez on behalf of 'Proyecto Argentino Interinstitucional de genomica de SARS-CoV-2' (PAIS Consortium)	Alicia Mistchenko et al
Argentina/PAIS-A1350/2022	EPI_ISL_12422422	2022-03-04	Laboratorio de Virologia del Hospital de Niños Dr Ricardo Gutierrez	Área de Secuenciación del Laboratorio de Virología del Hospital de Niños Dr. Ricardo Gutierrez on behalf of 'Proyecto Argentino Interinstitucional de genomica de SARS-CoV-2' (PAIS Consortium)	Alicia Mistchenko et al
Argentina/PAIS-A1351/2022	EPI_ISL_12420905	2022-03-07	Hospital Alemán	Área de Secuenciación del Laboratorio de Virología del Hospital de Niños Dr. Ricardo Gutierrez on behalf of 'Proyecto Argentino Interinstitucional de genomica de SARS-CoV-2' (PAIS Consortium)	Eugenia Ibañez et al
Argentina/PAIS-E0623/2021	EPI_ISL_7734615	2021-12-09	Laboratorio CIBIC (Rosario)	Grupo de Genómica y Bioinformática del Instituto de Investigación de la Cadena Láctea CONICET-INTA on behalf of 'Proyecto Argentino Interinstitucional de genomica de SARS-CoV-2' (PAIS Consortium)	Eberhardt et al
Argentina/PAIS-E0639/2021	EPI_ISL_7877461	2021-12-12	Laboratorio CIBIC (Rosario)	Grupo de Genómica y Bioinformática del Instituto de Investigación de la Cadena Láctea CONICET-INTA on behalf of 'Proyecto Argentino Interinstitucional de genomica de SARS-CoV-2' (PAIS Consortium)	Eberhardt et al
Argentina/PAIS-E0655/2021	EPI_ISL_8146450	2021-12-15	Laboratorio Central de la Ciudad de Santa Fe	Grupo de Genómica y Bioinformática del Instituto de Investigación de la Cadena Láctea CONICET-INTA on behalf of 'Proyecto Argentino Interinstitucional de genomica de SARS-CoV-2' (PAIS Consortium)	Eberhardt et al
Argentina/PAIS-E0696/2021	EPI_ISL_8938133	2021-12-31	Hospital Jaime Ferre - SAMCO Rafaela	Grupo de Genómica y Bioinformática del Instituto de Investigación de la Cadena Láctea CONICET-INTA on behalf of 'Proyecto Argentino Interinstitucional de genomica de SARS-CoV-2' (PAIS Consortium)	Eberhardt et al
Argentina/PAIS-E0704/2022	EPI_ISL_8938141	2022-01-07	Laboratorio Central de la Ciudad de Santa Fe	Grupo de Genómica y Bioinformática del Instituto de Investigación de la Cadena Láctea CONICET-INTA on behalf of 'Proyecto Argentino Interinstitucional de genomica de SARS-CoV-2' (PAIS Consortium)	Eberhardt et al
Argentina/PAIS-E0705/2022	EPI_ISL_8938142	2022-01-08	Laboratorio Central de la Ciudad de Santa Fe	Grupo de Genómica y Bioinformática del Instituto de Investigación de la Cadena Láctea CONICET-INTA on behalf of 'Proyecto Argentino Interinstitucional de genomica de SARS-CoV-2' (PAIS Consortium)	Eberhardt et al
Argentina/PAIS-E0714/2022	EPI_ISL_8938151	2022-01-10	Laboratorio Central de la Ciudad de Santa Fe	Grupo de Genómica y Bioinformática del Instituto de Investigación de la Cadena Láctea CONICET-INTA on behalf of 'Proyecto Argentino Interinstitucional de genomica de SARS-CoV-2' (PAIS Consortium)	Eberhardt et al
Argentina/PAIS-E0715/2022	EPI_ISL_8938152	2022-01-08	Laboratorio Central de la Ciudad de Santa Fe	Grupo de Genómica y Bioinformática del Instituto de Investigación de la Cadena Láctea CONICET-INTA on behalf of 'Proyecto Argentino Interinstitucional de genomica de SARS-CoV-2' (PAIS Consortium)	Eberhardt et al
Argentina/PAIS-E0726/2021	EPI_ISL_10637270	2021-12-31	Laboratorio Central de la Ciudad de Santa Fe	Grupo de Genómica y Bioinformática del Instituto de Investigación de la Cadena Láctea CONICET-INTA on behalf of 'Proyecto Argentino Interinstitucional de genomica de SARS-CoV-2' (PAIS Consortium)	Eberhardt et al
Argentina/PAIS-E0727/2022	EPI_ISL_10637271	2022-01-02	Laboratorio Central de la Ciudad de Santa Fe	Grupo de Genómica y Bioinformática del Instituto de Investigación de la Cadena Láctea CONICET-INTA on behalf of 'Proyecto Argentino Interinstitucional de genomica de SARS-CoV-2' (PAIS Consortium)	Eberhardt et al
Argentina/PAIS-E0728/2022	EPI_ISL_10637272	2022-01-02	Laboratorio Central de la Ciudad de Santa Fe	Grupo de Genómica y Bioinformática del Instituto de Investigación de la Cadena Láctea CONICET-INTA on behalf of 'Proyecto Argentino Interinstitucional de genomica de SARS-CoV-2' (PAIS Consortium)	Eberhardt et al
Argentina/PAIS-E0731/2022	EPI_ISL_10637275	2022-01-03	Laboratorio Central de la Ciudad de Santa Fe	Grupo de Genómica y Bioinformática del Instituto de Investigación de la Cadena Láctea CONICET-INTA on behalf of 'Proyecto Argentino Interinstitucional de genomica de SARS-CoV-2' (PAIS Consortium)	Eberhardt et al
Argentina/PAIS-E0732/2022	EPI_ISL_10637276	2022-01-03	Laboratorio Central de la Ciudad de Santa Fe	Grupo de Genómica y Bioinformática del Instituto de Investigación de la Cadena Láctea CONICET-INTA on behalf of 'Proyecto Argentino Interinstitucional de genomica de SARS-CoV-2' (PAIS Consortium)	Eberhardt et al
Argentina/PAIS-E0741/2022	EPI_ISL_10637284	2022-01-05	Laboratorio Central de la Ciudad de Santa Fe	Grupo de Genómica y Bioinformática del Instituto de Investigación de la Cadena Láctea CONICET-INTA on behalf of 'Proyecto Argentino Interinstitucional de genomica de SARS-CoV-2' (PAIS Consortium)	Eberhardt et al
Argentina/PAIS-E0743/2022	EPI_ISL_10637286	2022-01-05	Laboratorio Central de la Ciudad de Santa Fe	Grupo de Genómica y Bioinformática del Instituto de Investigación de la Cadena Láctea CONICET-INTA on behalf of 'Proyecto Argentino Interinstitucional de genomica de SARS-CoV-2' (PAIS Consortium)	Eberhardt et al
Argentina/PAIS-E0746/2022	EPI_ISL_10637289	2022-01-07	Laboratorio Central de la Ciudad de Santa Fe	Grupo de Genómica y Bioinformática del Instituto de Investigación de la Cadena Láctea CONICET-INTA on behalf of 'Proyecto Argentino Interinstitucional de genomica de SARS-CoV-2' (PAIS Consortium)	Eberhardt et al
Argentina/PAIS-E0749/2022	EPI_ISL_10637292	2022-01-07	Laboratorio Central de la Ciudad de Santa Fe	Grupo de Genómica y Bioinformática del Instituto de Investigación de la Cadena Láctea CONICET-INTA on behalf of 'Proyecto Argentino Interinstitucional de genomica de SARS-CoV-2' (PAIS Consortium)	Eberhardt et al
Argentina/PAIS-E0752/2022	EPI_ISL_10637295	2022-01-07	Laboratorio Central de la Ciudad de Santa Fe	Grupo de Genómica y Bioinformática del Instituto de Investigación de la Cadena Láctea CONICET-INTA on behalf of 'Proyecto Argentino Interinstitucional de genomica de SARS-CoV-2' (PAIS Consortium)	Eberhardt et al
Argentina/PAIS-E0754/2022	EPI_ISL_10637297	2022-01-07	Laboratorio Central de la Ciudad de Santa Fe	Grupo de Genómica y Bioinformática del Instituto de Investigación de la Cadena Láctea CONICET-INTA on behalf of 'Proyecto Argentino Interinstitucional de genomica de SARS-CoV-2' (PAIS Consortium)	Eberhardt et al
Argentina/PAIS-E0756/2022	EPI_ISL_10637299	2022-01-07	Laboratorio Central de la Ciudad de Santa Fe	Grupo de Genómica y Bioinformática del Instituto de Investigación de la Cadena Láctea CONICET-INTA on behalf of 'Proyecto Argentino Interinstitucional de genomica de SARS-CoV-2' (PAIS Consortium)	Eberhardt et al
Argentina/PAIS-E0759/2022	EPI_ISL_10637301	2022-01-24	Hospital Jaime Ferre - SAMCO Rafaela	Grupo de Genómica y Bioinformática del Instituto de Investigación de la Cadena Láctea CONICET-INTA on behalf of 'Proyecto Argentino Interinstitucional de genomica de SARS-CoV-2' (PAIS Consortium)	Eberhardt et al
Argentina/PAIS-E0764/2022	EPI_ISL_10829184	2022-01-21	Hospital Jaime Ferre - SAMCO Rafaela	Grupo de Genómica y Bioinformática del Instituto de Investigación de la Cadena Láctea CONICET-INTA on behalf of 'Proyecto Argentino Interinstitucional de genomica de SARS-CoV-2' (PAIS Consortium)	Eberhardt et al
Argentina/PAIS-E0765/2022	EPI_ISL_10637306	2022-01-20	Hospital Jaime Ferre - SAMCO Rafaela	Grupo de Genómica y Bioinformática del Instituto de Investigación de la Cadena Láctea CONICET-INTA on behalf of 'Proyecto Argentino Interinstitucional de genomica de SARS-CoV-2' (PAIS Consortium)	Eberhardt et al
Argentina/PAIS-E0774/2022	EPI_ISL_10637315	2022-01-06	Laboratorio de Alta Complejidad (LACMI), Instituto de Genética Humana (IGeHM), Parque de la Salud de la provincia de Misiones, Universidad Nacional de Misiones (UNaM)	Grupo de Genómica y Bioinformática del Instituto de Investigación de la Cadena Láctea CONICET-INTA on behalf of 'Proyecto Argentino Interinstitucional de genomica de SARS-CoV-2' (PAIS Consortium)	Eberhardt et al
Argentina/PAIS-E0788/2022	EPI_ISL_10637329	2022-01-24	Laboratorio Central de la Ciudad de Santa Fe	Grupo de Genómica y Bioinformática del Instituto de Investigación de la Cadena Láctea CONICET-INTA on behalf of 'Proyecto Argentino Interinstitucional de genomica de SARS-CoV-2' (PAIS Consortium)	Eberhardt et al
Argentina/PAIS-E0791/2022	EPI_ISL_10637332	2022-01-24	Laboratorio Central de la Ciudad de Santa Fe	Grupo de Genómica y Bioinformática del Instituto de Investigación de la Cadena Láctea CONICET-INTA on behalf of 'Proyecto Argentino Interinstitucional de genomica de SARS-CoV-2' (PAIS Consortium)	Eberhardt et al
Argentina/PAIS-E0792/2022	EPI_ISL_10637333	2022-01-24	Laboratorio Central de la Ciudad de Santa Fe	Grupo de Genómica y Bioinformática del Instituto de Investigación de la Cadena Láctea CONICET-INTA on behalf of 'Proyecto Argentino Interinstitucional de genomica de SARS-CoV-2' (PAIS Consortium)	Eberhardt et al
Argentina/PAIS-E0795/2022	EPI_ISL_10637336	2022-01-24	Laboratorio Central de la Ciudad de Santa Fe	Grupo de Genómica y Bioinformática del Instituto de Investigación de la Cadena Láctea CONICET-INTA on behalf of 'Proyecto Argentino Interinstitucional de genomica de SARS-CoV-2' (PAIS Consortium)	Eberhardt et al
Argentina/PAIS-E0796/2022	EPI_ISL_10637337	2022-01-24	Laboratorio Central de la Ciudad de Santa Fe	Grupo de Genómica y Bioinformática del Instituto de Investigación de la Cadena Láctea CONICET-INTA on behalf of 'Proyecto Argentino Interinstitucional de genomica de SARS-CoV-2' (PAIS Consortium)	Eberhardt et al
Argentina/PAIS-E0797/2022	EPI_ISL_10637338	2022-01-24	Laboratorio Central de la Ciudad de Santa Fe	Grupo de Genómica y Bioinformática del Instituto de Investigación de la Cadena Láctea CONICET-INTA on behalf of 'Proyecto Argentino Interinstitucional de genomica de SARS-CoV-2' (PAIS Consortium)	Eberhardt et al
Argentina/PAIS-E0800/2022	EPI_ISL_10637341	2022-01-24	Laboratorio Central de la Ciudad de Santa Fe	Grupo de Genómica y Bioinformática del Instituto de Investigación de la Cadena Láctea CONICET-INTA on behalf of 'Proyecto Argentino Interinstitucional de genomica de SARS-CoV-2' (PAIS Consortium)	Eberhardt et al
Argentina/PAIS-E0801/2022	EPI_ISL_10637342	2022-01-23	Laboratorio Central de la Ciudad de Santa Fe	Grupo de Genómica y Bioinformática del Instituto de Investigación de la Cadena Láctea CONICET-INTA on behalf of 'Proyecto Argentino Interinstitucional de genomica de SARS-CoV-2' (PAIS Consortium)	Eberhardt et al
Argentina/PAIS-E0805/2022	EPI_ISL_10637346	2022-01-25	Laboratorio Central de la Ciudad de Santa Fe	Grupo de Genómica y Bioinformática del Instituto de Investigación de la Cadena Láctea CONICET-INTA on behalf of 'Proyecto Argentino Interinstitucional de genomica de SARS-CoV-2' (PAIS Consortium)	Eberhardt et al
Argentina/PAIS-E0806/2022	EPI_ISL_10637347	2022-01-24	Laboratorio Central de la Ciudad de Santa Fe	Grupo de Genómica y Bioinformática del Instituto de Investigación de la Cadena Láctea CONICET-INTA on behalf of 'Proyecto Argentino Interinstitucional de genomica de SARS-CoV-2' (PAIS Consortium)	Eberhardt et al
Argentina/PAIS-E0808/2022	EPI_ISL_10637349	2022-01-24	Laboratorio Central de la Ciudad de Santa Fe	Grupo de Genómica y Bioinformática del Instituto de Investigación de la Cadena Láctea CONICET-INTA on behalf of 'Proyecto Argentino Interinstitucional de genomica de SARS-CoV-2' (PAIS Consortium)	Eberhardt et al
Argentina/PAIS-E0809/2022	EPI_ISL_10637350	2022-01-24	Laboratorio Central de la Ciudad de Santa Fe	Grupo de Genómica y Bioinformática del Instituto de Investigación de la Cadena Láctea CONICET-INTA on behalf of 'Proyecto Argentino Interinstitucional de genomica de SARS-CoV-2' (PAIS Consortium)	Eberhardt et al
Argentina/PAIS-E0810/2022	EPI_ISL_10637351	2022-01-24	Laboratorio Central de la Ciudad de Santa Fe	Grupo de Genómica y Bioinformática del Instituto de Investigación de la Cadena Láctea CONICET-INTA on behalf of 'Proyecto Argentino Interinstitucional de genomica de SARS-CoV-2' (PAIS Consortium)	Eberhardt et al
Argentina/PAIS-E0826/2022	EPI_ISL_10637365	2022-01-08	Laboratorio de Alta Complejidad (LACMI), Instituto de Genética Humana (IGeHM), Parque de la Salud de la provincia de Misiones, Universidad Nacional de Misiones (UNaM)	Grupo de Genómica y Bioinformática del Instituto de Investigación de la Cadena Láctea CONICET-INTA on behalf of 'Proyecto Argentino Interinstitucional de genomica de SARS-CoV-2' (PAIS Consortium)	Eberhardt et al
Argentina/PAIS-E0828/2022	EPI_ISL_10637367	2022-01-10	Laboratorio de Alta Complejidad (LACMI), Instituto de Genética Humana (IGeHM), Parque de la Salud de la provincia de Misiones, Universidad Nacional de Misiones (UNaM)	Grupo de Genómica y Bioinformática del Instituto de Investigación de la Cadena Láctea CONICET-INTA on behalf of 'Proyecto Argentino Interinstitucional de genomica de SARS-CoV-2' (PAIS Consortium)	Eberhardt et al
Argentina/PAIS-E0836/2022	EPI_ISL_10637375	2022-01-14	Laboratorio de Alta Complejidad (LACMI), Instituto de Genética Humana (IGeHM), Parque de la Salud de la provincia de Misiones, Universidad Nacional de Misiones (UNaM)	Grupo de Genómica y Bioinformática del Instituto de Investigación de la Cadena Láctea CONICET-INTA on behalf of 'Proyecto Argentino Interinstitucional de genomica de SARS-CoV-2' (PAIS Consortium)	Eberhardt et al
Argentina/PAIS-E0848/2022	EPI_ISL_10637385	2022-01-21	Laboratorio de Alta Complejidad (LACMI), Instituto de Genética Humana (IGeHM), Parque de la Salud de la provincia de Misiones, Universidad Nacional de Misiones (UNaM)	Grupo de Genómica y Bioinformática del Instituto de Investigación de la Cadena Láctea CONICET-INTA on behalf of 'Proyecto Argentino Interinstitucional de genomica de SARS-CoV-2' (PAIS Consortium)	Eberhardt et al
Argentina/PAIS-E0852/2022	EPI_ISL_10637387	2022-01-24	Laboratorio de Alta Complejidad (LACMI), Instituto de Genética Humana (IGeHM), Parque de la Salud de la provincia de Misiones, Universidad Nacional de Misiones (UNaM)	Grupo de Genómica y Bioinformática del Instituto de Investigación de la Cadena Láctea CONICET-INTA on behalf of 'Proyecto Argentino Interinstitucional de genomica de SARS-CoV-2' (PAIS Consortium)	Eberhardt et al
Argentina/PAIS-E0854/2022	EPI_ISL_10637388	2022-01-27	Laboratorio de Alta Complejidad (LACMI), Instituto de Genética Humana (IGeHM), Parque de la Salud de la provincia de Misiones, Universidad Nacional de Misiones (UNaM)	Grupo de Genómica y Bioinformática del Instituto de Investigación de la Cadena Láctea CONICET-INTA on behalf of 'Proyecto Argentino Interinstitucional de genomica de SARS-CoV-2' (PAIS Consortium)	Eberhardt et al
Argentina/PAIS-E0879/2021	EPI_ISL_10637409	2021-12-28	Laboratorio de Alta Complejidad (LACMI), Instituto de Genética Humana (IGeHM), Parque de la Salud de la provincia de Misiones, Universidad Nacional de Misiones (UNaM)	Grupo de Genómica y Bioinformática del Instituto de Investigación de la Cadena Láctea CONICET-INTA on behalf of 'Proyecto Argentino Interinstitucional de genomica de SARS-CoV-2' (PAIS Consortium)	Eberhardt et al
Argentina/PAIS-E0882/2022	EPI_ISL_11386711	2022-01-28	Laboratorio Central de la Ciudad de Santa Fe	Grupo de Genómica y Bioinformática del Instituto de Investigación de la Cadena Láctea CONICET-INTA on behalf of 'Proyecto Argentino Interinstitucional de genomica de SARS-CoV-2' (PAIS Consortium)	Eberhardt et al
Argentina/PAIS-E0883/2022	EPI_ISL_11386712	2022-01-29	Laboratorio Central de la Ciudad de Santa Fe	Grupo de Genómica y Bioinformática del Instituto de Investigación de la Cadena Láctea CONICET-INTA on behalf of 'Proyecto Argentino Interinstitucional de genomica de SARS-CoV-2' (PAIS Consortium)	Eberhardt et al
Argentina/PAIS-E0884/2022	EPI_ISL_11386713	2022-01-29	Laboratorio Central de la Ciudad de Santa Fe	Grupo de Genómica y Bioinformática del Instituto de Investigación de la Cadena Láctea CONICET-INTA on behalf of 'Proyecto Argentino Interinstitucional de genomica de SARS-CoV-2' (PAIS Consortium)	Eberhardt et al
Argentina/PAIS-E0890/2022	EPI_ISL_11386717	2022-02-03	Laboratorio Central de la Ciudad de Santa Fe	Grupo de Genómica y Bioinformática del Instituto de Investigación de la Cadena Láctea CONICET-INTA on behalf of 'Proyecto Argentino Interinstitucional de genomica de SARS-CoV-2' (PAIS Consortium)	Eberhardt et al
Argentina/PAIS-E0891/2022	EPI_ISL_11386718	2022-02-03	Laboratorio Central de la Ciudad de Santa Fe	Grupo de Genómica y Bioinformática del Instituto de Investigación de la Cadena Láctea CONICET-INTA on behalf of 'Proyecto Argentino Interinstitucional de genomica de SARS-CoV-2' (PAIS Consortium)	Eberhardt et al
Argentina/PAIS-E0892/2022	EPI_ISL_11386719	2022-02-03	Laboratorio Central de la Ciudad de Santa Fe	Grupo de Genómica y Bioinformática del Instituto de Investigación de la Cadena Láctea CONICET-INTA on behalf of 'Proyecto Argentino Interinstitucional de genomica de SARS-CoV-2' (PAIS Consortium)	Eberhardt et al
Argentina/PAIS-E0893/2022	EPI_ISL_11386720	2022-02-03	Laboratorio Central de la Ciudad de Santa Fe	Grupo de Genómica y Bioinformática del Instituto de Investigación de la Cadena Láctea CONICET-INTA on behalf of 'Proyecto Argentino Interinstitucional de genomica de SARS-CoV-2' (PAIS Consortium)	Eberhardt et al
Argentina/PAIS-E0894/2022	EPI_ISL_11386721	2022-02-03	Laboratorio Central de la Ciudad de Santa Fe	Grupo de Genómica y Bioinformática del Instituto de Investigación de la Cadena Láctea CONICET-INTA on behalf of 'Proyecto Argentino Interinstitucional de genomica de SARS-CoV-2' (PAIS Consortium)	Eberhardt et al
Argentina/PAIS-E0896/2022	EPI_ISL_11386722	2022-02-04	Laboratorio Central de la Ciudad de Santa Fe	Grupo de Genómica y Bioinformática del Instituto de Investigación de la Cadena Láctea CONICET-INTA on behalf of 'Proyecto Argentino Interinstitucional de genomica de SARS-CoV-2' (PAIS Consortium)	Eberhardt et al
Argentina/PAIS-E0897/2022	EPI_ISL_11386723	2022-02-04	Laboratorio Central de la Ciudad de Santa Fe	Grupo de Genómica y Bioinformática del Instituto de Investigación de la Cadena Láctea CONICET-INTA on behalf of 'Proyecto Argentino Interinstitucional de genomica de SARS-CoV-2' (PAIS Consortium)	Eberhardt et al
Argentina/PAIS-E0898/2022	EPI_ISL_11386724	2022-02-04	Laboratorio Central de la Ciudad de Santa Fe	Grupo de Genómica y Bioinformática del Instituto de Investigación de la Cadena Láctea CONICET-INTA on behalf of 'Proyecto Argentino Interinstitucional de genomica de SARS-CoV-2' (PAIS Consortium)	Eberhardt et al
Argentina/PAIS-E0899/2022	EPI_ISL_11386725	2022-02-04	Laboratorio Central de la Ciudad de Santa Fe	Grupo de Genómica y Bioinformática del Instituto de Investigación de la Cadena Láctea CONICET-INTA on behalf of 'Proyecto Argentino Interinstitucional de genomica de SARS-CoV-2' (PAIS Consortium)	Eberhardt et al
Argentina/PAIS-E0906/2022	EPI_ISL_11386731	2022-01-25	Laboratorio Central de la Ciudad de Santa Fe	Grupo de Genómica y Bioinformática del Instituto de Investigación de la Cadena Láctea CONICET-INTA on behalf of 'Proyecto Argentino Interinstitucional de genomica de SARS-CoV-2' (PAIS Consortium)	Eberhardt et al
Argentina/PAIS-E0908/2022	EPI_ISL_11386733	2022-01-25	Laboratorio Central de la Ciudad de Santa Fe	Grupo de Genómica y Bioinformática del Instituto de Investigación de la Cadena Láctea CONICET-INTA on behalf of 'Proyecto Argentino Interinstitucional de genomica de SARS-CoV-2' (PAIS Consortium)	Eberhardt et al
Argentina/PAIS-E0910/2022	EPI_ISL_11386735	2022-01-25	Laboratorio Central de la Ciudad de Santa Fe	Grupo de Genómica y Bioinformática del Instituto de Investigación de la Cadena Láctea CONICET-INTA on behalf of 'Proyecto Argentino Interinstitucional de genomica de SARS-CoV-2' (PAIS Consortium)	Eberhardt et al
Argentina/PAIS-E0911/2022	EPI_ISL_11386736	2022-01-25	Laboratorio Central de la Ciudad de Santa Fe	Grupo de Genómica y Bioinformática del Instituto de Investigación de la Cadena Láctea CONICET-INTA on behalf of 'Proyecto Argentino Interinstitucional de genomica de SARS-CoV-2' (PAIS Consortium)	Eberhardt et al
Argentina/PAIS-E0912/2022	EPI_ISL_11386737	2022-01-26	Laboratorio Central de la Ciudad de Santa Fe	Grupo de Genómica y Bioinformática del Instituto de Investigación de la Cadena Láctea CONICET-INTA on behalf of 'Proyecto Argentino Interinstitucional de genomica de SARS-CoV-2' (PAIS Consortium)	Eberhardt et al
Argentina/PAIS-E0913/2022	EPI_ISL_11386738	2022-01-26	Laboratorio Central de la Ciudad de Santa Fe	Grupo de Genómica y Bioinformática del Instituto de Investigación de la Cadena Láctea CONICET-INTA on behalf of 'Proyecto Argentino Interinstitucional de genomica de SARS-CoV-2' (PAIS Consortium)	Eberhardt et al
Argentina/PAIS-E0914/2022	EPI_ISL_11386739	2022-01-25	Laboratorio Central de la Ciudad de Santa Fe	Grupo de Genómica y Bioinformática del Instituto de Investigación de la Cadena Láctea CONICET-INTA on behalf of 'Proyecto Argentino Interinstitucional de genomica de SARS-CoV-2' (PAIS Consortium)	Eberhardt et al
Argentina/PAIS-E0916/2022	EPI_ISL_11386741	2022-01-26	Laboratorio Central de la Ciudad de Santa Fe	Grupo de Genómica y Bioinformática del Instituto de Investigación de la Cadena Láctea CONICET-INTA on behalf of 'Proyecto Argentino Interinstitucional de genomica de SARS-CoV-2' (PAIS Consortium)	Eberhardt et al
Argentina/PAIS-E0917/2022	EPI_ISL_11386742	2022-01-26	Laboratorio Central de la Ciudad de Santa Fe	Grupo de Genómica y Bioinformática del Instituto de Investigación de la Cadena Láctea CONICET-INTA on behalf of 'Proyecto Argentino Interinstitucional de genomica de SARS-CoV-2' (PAIS Consortium)	Eberhardt et al
Argentina/PAIS-E0918/2022	EPI_ISL_11386743	2022-01-26	Laboratorio Central de la Ciudad de Santa Fe	Grupo de Genómica y Bioinformática del Instituto de Investigación de la Cadena Láctea CONICET-INTA on behalf of 'Proyecto Argentino Interinstitucional de genomica de SARS-CoV-2' (PAIS Consortium)	Eberhardt et al
Argentina/PAIS-E0921/2022	EPI_ISL_11386746	2022-01-25	Laboratorio Central de la Ciudad de Santa Fe	Grupo de Genómica y Bioinformática del Instituto de Investigación de la Cadena Láctea CONICET-INTA on behalf of 'Proyecto Argentino Interinstitucional de genomica de SARS-CoV-2' (PAIS Consortium)	Eberhardt et al
Argentina/PAIS-E0923/2022	EPI_ISL_11386749	2022-01-28	Laboratorio Central de la Ciudad de Santa Fe	Grupo de Genómica y Bioinformática del Instituto de Investigación de la Cadena Láctea CONICET-INTA on behalf of 'Proyecto Argentino Interinstitucional de genomica de SARS-CoV-2' (PAIS Consortium)	Eberhardt et al
Argentina/PAIS-E0924/2022	EPI_ISL_11386751	2022-01-28	Laboratorio Central de la Ciudad de Santa Fe	Grupo de Genómica y Bioinformática del Instituto de Investigación de la Cadena Láctea CONICET-INTA on behalf of 'Proyecto Argentino Interinstitucional de genomica de SARS-CoV-2' (PAIS Consortium)	Eberhardt et al
Argentina/PAIS-E0925/2022	EPI_ISL_11386752	2022-01-28	Laboratorio Central de la Ciudad de Santa Fe	Grupo de Genómica y Bioinformática del Instituto de Investigación de la Cadena Láctea CONICET-INTA on behalf of 'Proyecto Argentino Interinstitucional de genomica de SARS-CoV-2' (PAIS Consortium)	Eberhardt et al
Argentina/PAIS-E0927/2022	EPI_ISL_11386754	2022-01-28	Laboratorio Central de la Ciudad de Santa Fe	Grupo de Genómica y Bioinformática del Instituto de Investigación de la Cadena Láctea CONICET-INTA on behalf of 'Proyecto Argentino Interinstitucional de genomica de SARS-CoV-2' (PAIS Consortium)	Eberhardt et al
Argentina/PAIS-E0928/2022	EPI_ISL_11386755	2022-01-28	Laboratorio Central de la Ciudad de Santa Fe	Grupo de Genómica y Bioinformática del Instituto de Investigación de la Cadena Láctea CONICET-INTA on behalf of 'Proyecto Argentino Interinstitucional de genomica de SARS-CoV-2' (PAIS Consortium)	Eberhardt et al
Argentina/PAIS-E0931/2022	EPI_ISL_11386758	2022-01-10	Laboratorio CIBIC (Rosario)	Grupo de Genómica y Bioinformática del Instituto de Investigación de la Cadena Láctea CONICET-INTA on behalf of 'Proyecto Argentino Interinstitucional de genomica de SARS-CoV-2' (PAIS Consortium)	Eberhardt et al
Argentina/PAIS-E0932/2022	EPI_ISL_11386759	2022-01-13	Laboratorio CIBIC (Rosario)	Grupo de Genómica y Bioinformática del Instituto de Investigación de la Cadena Láctea CONICET-INTA on behalf of 'Proyecto Argentino Interinstitucional de genomica de SARS-CoV-2' (PAIS Consortium)	Eberhardt et al
Argentina/PAIS-E0933/2022	EPI_ISL_11386760	2022-01-17	Laboratorio CIBIC (Rosario)	Grupo de Genómica y Bioinformática del Instituto de Investigación de la Cadena Láctea CONICET-INTA on behalf of 'Proyecto Argentino Interinstitucional de genomica de SARS-CoV-2' (PAIS Consortium)	Eberhardt et al
Argentina/PAIS-E0936/2022	EPI_ISL_11386763	2022-01-25	Laboratorio CIBIC (Rosario)	Grupo de Genómica y Bioinformática del Instituto de Investigación de la Cadena Láctea CONICET-INTA on behalf of 'Proyecto Argentino Interinstitucional de genomica de SARS-CoV-2' (PAIS Consortium)	Eberhardt et al
Argentina/PAIS-E0938/2022	EPI_ISL_11386764	2022-02-05	Laboratorio CIBIC (Rosario)	Grupo de Genómica y Bioinformática del Instituto de Investigación de la Cadena Láctea CONICET-INTA on behalf of 'Proyecto Argentino Interinstitucional de genomica de SARS-CoV-2' (PAIS Consortium)	Eberhardt et al
Argentina/PAIS-E0939/2022	EPI_ISL_11386765	2022-02-08	Laboratorio CIBIC (Rosario)	Grupo de Genómica y Bioinformática del Instituto de Investigación de la Cadena Láctea CONICET-INTA on behalf of 'Proyecto Argentino Interinstitucional de genomica de SARS-CoV-2' (PAIS Consortium)	Eberhardt et al
Argentina/PAIS-E0940/2022	EPI_ISL_11386766	2022-02-08	Laboratorio CIBIC (Rosario)	Grupo de Genómica y Bioinformática del Instituto de Investigación de la Cadena Láctea CONICET-INTA on behalf of 'Proyecto Argentino Interinstitucional de genomica de SARS-CoV-2' (PAIS Consortium)	Eberhardt et al
Argentina/PAIS-E0942/2022	EPI_ISL_11386768	2022-02-14	Laboratorio CIBIC (Rosario)	Grupo de Genómica y Bioinformática del Instituto de Investigación de la Cadena Láctea CONICET-INTA on behalf of 'Proyecto Argentino Interinstitucional de genomica de SARS-CoV-2' (PAIS Consortium)	Eberhardt et al
Argentina/PAIS-E0944/2022	EPI_ISL_11386770	2022-02-22	Laboratorio CIBIC (Rosario)	Grupo de Genómica y Bioinformática del Instituto de Investigación de la Cadena Láctea CONICET-INTA on behalf of 'Proyecto Argentino Interinstitucional de genomica de SARS-CoV-2' (PAIS Consortium)	Eberhardt et al
Argentina/PAIS-E0946/2022	EPI_ISL_11386772	2022-02-23	Laboratorio Central de la Ciudad de Santa Fe	Grupo de Genómica y Bioinformática del Instituto de Investigación de la Cadena Láctea CONICET-INTA on behalf of 'Proyecto Argentino Interinstitucional de genomica de SARS-CoV-2' (PAIS Consortium)	Eberhardt et al
Argentina/PAIS-E0947/2022	EPI_ISL_11386773	2022-02-23	Laboratorio Central de la Ciudad de Santa Fe	Grupo de Genómica y Bioinformática del Instituto de Investigación de la Cadena Láctea CONICET-INTA on behalf of 'Proyecto Argentino Interinstitucional de genomica de SARS-CoV-2' (PAIS Consortium)	Eberhardt et al
Argentina/PAIS-E0949/2022	EPI_ISL_11386775	2022-02-24	Laboratorio Central de la Ciudad de Santa Fe	Grupo de Genómica y Bioinformática del Instituto de Investigación de la Cadena Láctea CONICET-INTA on behalf of 'Proyecto Argentino Interinstitucional de genomica de SARS-CoV-2' (PAIS Consortium)	Eberhardt et al
Argentina/PAIS-E0950/2022	EPI_ISL_11386776	2022-02-25	Laboratorio Central de la Ciudad de Santa Fe	Grupo de Genómica y Bioinformática del Instituto de Investigación de la Cadena Láctea CONICET-INTA on behalf of 'Proyecto Argentino Interinstitucional de genomica de SARS-CoV-2' (PAIS Consortium)	Eberhardt et al
Argentina/PAIS-E0952/2022	EPI_ISL_11386777	2022-02-25	Laboratorio Central de la Ciudad de Santa Fe	Grupo de Genómica y Bioinformática del Instituto de Investigación de la Cadena Láctea CONICET-INTA on behalf of 'Proyecto Argentino Interinstitucional de genomica de SARS-CoV-2' (PAIS Consortium)	Eberhardt et al
Argentina/PAIS-E0953/2022	EPI_ISL_11386778	2022-02-26	Laboratorio Central de la Ciudad de Santa Fe	Grupo de Genómica y Bioinformática del Instituto de Investigación de la Cadena Láctea CONICET-INTA on behalf of 'Proyecto Argentino Interinstitucional de genomica de SARS-CoV-2' (PAIS Consortium)	Eberhardt et al
Argentina/PAIS-E0954/2022	EPI_ISL_11386779	2022-03-01	Laboratorio Central de la Ciudad de Santa Fe	Grupo de Genómica y Bioinformática del Instituto de Investigación de la Cadena Láctea CONICET-INTA on behalf of 'Proyecto Argentino Interinstitucional de genomica de SARS-CoV-2' (PAIS Consortium)	Eberhardt et al
Argentina/PAIS-E0957/2022	EPI_ISL_11386782	2022-03-04	Laboratorio Central de la Ciudad de Santa Fe	Grupo de Genómica y Bioinformática del Instituto de Investigación de la Cadena Láctea CONICET-INTA on behalf of 'Proyecto Argentino Interinstitucional de genomica de SARS-CoV-2' (PAIS Consortium)	Eberhardt et al
Argentina/PAIS-E0958/2022	EPI_ISL_11386783	2022-03-04	Laboratorio Central de la Ciudad de Santa Fe	Grupo de Genómica y Bioinformática del Instituto de Investigación de la Cadena Láctea CONICET-INTA on behalf of 'Proyecto Argentino Interinstitucional de genomica de SARS-CoV-2' (PAIS Consortium)	Eberhardt et al
Argentina/PAIS-E0959/2022	EPI_ISL_11386785	2022-03-05	Laboratorio Central de la Ciudad de Santa Fe	Grupo de Genómica y Bioinformática del Instituto de Investigación de la Cadena Láctea CONICET-INTA on behalf of 'Proyecto Argentino Interinstitucional de genomica de SARS-CoV-2' (PAIS Consortium)	Eberhardt et al
Argentina/PAIS-E0961/2022	EPI_ISL_11386788	2022-03-07	Laboratorio Central de la Ciudad de Santa Fe	Grupo de Genómica y Bioinformática del Instituto de Investigación de la Cadena Láctea CONICET-INTA on behalf of 'Proyecto Argentino Interinstitucional de genomica de SARS-CoV-2' (PAIS Consortium)	Eberhardt et al
Argentina/PAIS-E0963/2022	EPI_ISL_11386790	2022-03-08	Laboratorio Central de la Ciudad de Santa Fe	Grupo de Genómica y Bioinformática del Instituto de Investigación de la Cadena Láctea CONICET-INTA on behalf of 'Proyecto Argentino Interinstitucional de genomica de SARS-CoV-2' (PAIS Consortium)	Eberhardt et al
Argentina/PAIS-E0964/2022	EPI_ISL_11386791	2022-02-04	Hospital Jaime Ferre - SAMCO Rafaela	Grupo de Genómica y Bioinformática del Instituto de Investigación de la Cadena Láctea CONICET-INTA on behalf of 'Proyecto Argentino Interinstitucional de genomica de SARS-CoV-2' (PAIS Consortium)	Eberhardt et al
Argentina/PAIS-E0965/2022	EPI_ISL_11386792	2022-02-07	Hospital Jaime Ferre - SAMCO Rafaela	Grupo de Genómica y Bioinformática del Instituto de Investigación de la Cadena Láctea CONICET-INTA on behalf of 'Proyecto Argentino Interinstitucional de genomica de SARS-CoV-2' (PAIS Consortium)	Eberhardt et al
Argentina/PAIS-E0966/2022	EPI_ISL_11386793	2022-02-08	Hospital Jaime Ferre - SAMCO Rafaela	Grupo de Genómica y Bioinformática del Instituto de Investigación de la Cadena Láctea CONICET-INTA on behalf of 'Proyecto Argentino Interinstitucional de genomica de SARS-CoV-2' (PAIS Consortium)	Eberhardt et al
Argentina/PAIS-E0967/2022	EPI_ISL_11386794	2022-02-16	Hospital Jaime Ferre - SAMCO Rafaela	Grupo de Genómica y Bioinformática del Instituto de Investigación de la Cadena Láctea CONICET-INTA on behalf of 'Proyecto Argentino Interinstitucional de genomica de SARS-CoV-2' (PAIS Consortium)	Eberhardt et al
Argentina/PAIS-E0970/2022	EPI_ISL_11386797	2022-02-19	Hospital Jaime Ferre - SAMCO Rafaela	Grupo de Genómica y Bioinformática del Instituto de Investigación de la Cadena Láctea CONICET-INTA on behalf of 'Proyecto Argentino Interinstitucional de genomica de SARS-CoV-2' (PAIS Consortium)	Eberhardt et al
Argentina/PAIS-E0971/2022	EPI_ISL_11386798	2022-02-21	Hospital Jaime Ferre - SAMCO Rafaela	Grupo de Genómica y Bioinformática del Instituto de Investigación de la Cadena Láctea CONICET-INTA on behalf of 'Proyecto Argentino Interinstitucional de genomica de SARS-CoV-2' (PAIS Consortium)	Eberhardt et al
Argentina/PAIS-E0972/2022	EPI_ISL_11386799	2022-02-22	Hospital Jaime Ferre - SAMCO Rafaela	Grupo de Genómica y Bioinformática del Instituto de Investigación de la Cadena Láctea CONICET-INTA on behalf of 'Proyecto Argentino Interinstitucional de genomica de SARS-CoV-2' (PAIS Consortium)	Eberhardt et al
Argentina/PAIS-E0973/2022	EPI_ISL_11386800	2022-02-23	Hospital Jaime Ferre - SAMCO Rafaela	Grupo de Genómica y Bioinformática del Instituto de Investigación de la Cadena Láctea CONICET-INTA on behalf of 'Proyecto Argentino Interinstitucional de genomica de SARS-CoV-2' (PAIS Consortium)	Eberhardt et al
Argentina/PAIS-E0974/2022	EPI_ISL_11386801	2022-02-26	Hospital Jaime Ferre - SAMCO Rafaela	Grupo de Genómica y Bioinformática del Instituto de Investigación de la Cadena Láctea CONICET-INTA on behalf of 'Proyecto Argentino Interinstitucional de genomica de SARS-CoV-2' (PAIS Consortium)	Eberhardt et al
Argentina/PAIS-E0975/2022	EPI_ISL_11386802	2022-02-28	Hospital Jaime Ferre - SAMCO Rafaela	Grupo de Genómica y Bioinformática del Instituto de Investigación de la Cadena Láctea CONICET-INTA on behalf of 'Proyecto Argentino Interinstitucional de genomica de SARS-CoV-2' (PAIS Consortium)	Eberhardt et al
Argentina/PAIS-E0977/2022	EPI_ISL_12030878	2022-03-21	Laboratorio Central de la Ciudad de Santa Fe	Grupo de Genómica y Bioinformática del Instituto de Investigación de la Cadena Láctea CONICET-INTA on behalf of 'Proyecto Argentino Interinstitucional de genomica de SARS-CoV-2' (PAIS Consortium)	Eberhardt et al
Argentina/PAIS-E0978/2022	EPI_ISL_12030879	2022-03-21	Laboratorio Central de la Ciudad de Santa Fe	Grupo de Genómica y Bioinformática del Instituto de Investigación de la Cadena Láctea CONICET-INTA on behalf of 'Proyecto Argentino Interinstitucional de genomica de SARS-CoV-2' (PAIS Consortium)	Eberhardt et al
Argentina/PAIS-E0979/2022	EPI_ISL_12030880	2022-03-22	Laboratorio Central de la Ciudad de Santa Fe	Grupo de Genómica y Bioinformática del Instituto de Investigación de la Cadena Láctea CONICET-INTA on behalf of 'Proyecto Argentino Interinstitucional de genomica de SARS-CoV-2' (PAIS Consortium)	Eberhardt et al
Argentina/PAIS-E0981/2022	EPI_ISL_12030882	2022-03-23	Laboratorio Central de la Ciudad de Santa Fe	Grupo de Genómica y Bioinformática del Instituto de Investigación de la Cadena Láctea CONICET-INTA on behalf of 'Proyecto Argentino Interinstitucional de genomica de SARS-CoV-2' (PAIS Consortium)	Eberhardt et al
Argentina/PAIS-E0982/2022	EPI_ISL_12030883	2022-03-24	Laboratorio Central de la Ciudad de Santa Fe	Grupo de Genómica y Bioinformática del Instituto de Investigación de la Cadena Láctea CONICET-INTA on behalf of 'Proyecto Argentino Interinstitucional de genomica de SARS-CoV-2' (PAIS Consortium)	Eberhardt et al
Argentina/PAIS-E0983/2022	EPI_ISL_12030884	2022-02-11	Laboratorio Central de la Ciudad de Santa Fe	Grupo de Genómica y Bioinformática del Instituto de Investigación de la Cadena Láctea CONICET-INTA on behalf of 'Proyecto Argentino Interinstitucional de genomica de SARS-CoV-2' (PAIS Consortium)	Eberhardt et al
Argentina/PAIS-E0984/2022	EPI_ISL_12030885	2022-02-12	Laboratorio Central de la Ciudad de Santa Fe	Grupo de Genómica y Bioinformática del Instituto de Investigación de la Cadena Láctea CONICET-INTA on behalf of 'Proyecto Argentino Interinstitucional de genomica de SARS-CoV-2' (PAIS Consortium)	Eberhardt et al
Argentina/PAIS-E0985/2022	EPI_ISL_12030886	2022-02-12	Laboratorio Central de la Ciudad de Santa Fe	Grupo de Genómica y Bioinformática del Instituto de Investigación de la Cadena Láctea CONICET-INTA on behalf of 'Proyecto Argentino Interinstitucional de genomica de SARS-CoV-2' (PAIS Consortium)	Eberhardt et al
Argentina/PAIS-E0987/2022	EPI_ISL_12030887	2022-02-15	Laboratorio Central de la Ciudad de Santa Fe	Grupo de Genómica y Bioinformática del Instituto de Investigación de la Cadena Láctea CONICET-INTA on behalf of 'Proyecto Argentino Interinstitucional de genomica de SARS-CoV-2' (PAIS Consortium)	Eberhardt et al
Argentina/PAIS-E0991/2022	EPI_ISL_12030890	2022-02-19	Laboratorio Central de la Ciudad de Santa Fe	Grupo de Genómica y Bioinformática del Instituto de Investigación de la Cadena Láctea CONICET-INTA on behalf of 'Proyecto Argentino Interinstitucional de genomica de SARS-CoV-2' (PAIS Consortium)	Eberhardt et al
Argentina/PAIS-E0993/2022	EPI_ISL_12030892	2022-02-19	Laboratorio Central de la Ciudad de Santa Fe	Grupo de Genómica y Bioinformática del Instituto de Investigación de la Cadena Láctea CONICET-INTA on behalf of 'Proyecto Argentino Interinstitucional de genomica de SARS-CoV-2' (PAIS Consortium)	Eberhardt et al
Argentina/PAIS-E0994/2022	EPI_ISL_12030893	2022-02-21	Laboratorio Central de la Ciudad de Santa Fe	Grupo de Genómica y Bioinformática del Instituto de Investigación de la Cadena Láctea CONICET-INTA on behalf of 'Proyecto Argentino Interinstitucional de genomica de SARS-CoV-2' (PAIS Consortium)	Eberhardt et al
Argentina/PAIS-E0995/2022	EPI_ISL_12030894	2022-02-21	Laboratorio Central de la Ciudad de Santa Fe	Grupo de Genómica y Bioinformática del Instituto de Investigación de la Cadena Láctea CONICET-INTA on behalf of 'Proyecto Argentino Interinstitucional de genomica de SARS-CoV-2' (PAIS Consortium)	Eberhardt et al
Argentina/PAIS-E0996/2022	EPI_ISL_12030895	2022-02-21	Laboratorio Central de la Ciudad de Santa Fe	Grupo de Genómica y Bioinformática del Instituto de Investigación de la Cadena Láctea CONICET-INTA on behalf of 'Proyecto Argentino Interinstitucional de genomica de SARS-CoV-2' (PAIS Consortium)	Eberhardt et al
Argentina/PAIS-E0997/2022	EPI_ISL_12030896	2022-02-21	Laboratorio Central de la Ciudad de Santa Fe	Grupo de Genómica y Bioinformática del Instituto de Investigación de la Cadena Láctea CONICET-INTA on behalf of 'Proyecto Argentino Interinstitucional de genomica de SARS-CoV-2' (PAIS Consortium)	Eberhardt et al
Argentina/PAIS-E0998/2022	EPI_ISL_12030897	2022-02-23	Laboratorio Central de la Ciudad de Santa Fe	Grupo de Genómica y Bioinformática del Instituto de Investigación de la Cadena Láctea CONICET-INTA on behalf of 'Proyecto Argentino Interinstitucional de genomica de SARS-CoV-2' (PAIS Consortium)	Eberhardt et al
Argentina/PAIS-E0999/2022	EPI_ISL_12030898	2022-03-03	Hospital Jaime Ferre - SAMCO Rafaela	Grupo de Genómica y Bioinformática del Instituto de Investigación de la Cadena Láctea CONICET-INTA on behalf of 'Proyecto Argentino Interinstitucional de genomica de SARS-CoV-2' (PAIS Consortium)	Eberhardt et al
Argentina/PAIS-E1000/2022	EPI_ISL_12030899	2022-03-05	Hospital Jaime Ferre - SAMCO Rafaela	Grupo de Genómica y Bioinformática del Instituto de Investigación de la Cadena Láctea CONICET-INTA on behalf of 'Proyecto Argentino Interinstitucional de genomica de SARS-CoV-2' (PAIS Consortium)	Eberhardt et al
Argentina/PAIS-E1001/2022	EPI_ISL_12030900	2022-03-08	Hospital Jaime Ferre - SAMCO Rafaela	Grupo de Genómica y Bioinformática del Instituto de Investigación de la Cadena Láctea CONICET-INTA on behalf of 'Proyecto Argentino Interinstitucional de genomica de SARS-CoV-2' (PAIS Consortium)	Eberhardt et al
Argentina/PAIS-E1002/2022	EPI_ISL_12030901	2022-03-11	Hospital Jaime Ferre - SAMCO Rafaela	Grupo de Genómica y Bioinformática del Instituto de Investigación de la Cadena Láctea CONICET-INTA on behalf of 'Proyecto Argentino Interinstitucional de genomica de SARS-CoV-2' (PAIS Consortium)	Eberhardt et al
Argentina/PAIS-E1003/2022	EPI_ISL_12030902	2022-03-15	Hospital Jaime Ferre - SAMCO Rafaela	Grupo de Genómica y Bioinformática del Instituto de Investigación de la Cadena Láctea CONICET-INTA on behalf of 'Proyecto Argentino Interinstitucional de genomica de SARS-CoV-2' (PAIS Consortium)	Eberhardt et al
Argentina/PAIS-E1004/2022	EPI_ISL_12030904	2022-03-16	Hospital Jaime Ferre - SAMCO Rafaela	Grupo de Genómica y Bioinformática del Instituto de Investigación de la Cadena Láctea CONICET-INTA on behalf of 'Proyecto Argentino Interinstitucional de genomica de SARS-CoV-2' (PAIS Consortium)	Eberhardt et al
Argentina/PAIS-E1005/2022	EPI_ISL_12030905	2022-03-22	Hospital Jaime Ferre - SAMCO Rafaela	Grupo de Genómica y Bioinformática del Instituto de Investigación de la Cadena Láctea CONICET-INTA on behalf of 'Proyecto Argentino Interinstitucional de genomica de SARS-CoV-2' (PAIS Consortium)	Eberhardt et al
Argentina/PAIS-E1006/2022	EPI_ISL_12030906	2022-03-26	Hospital Jaime Ferre - SAMCO Rafaela	Grupo de Genómica y Bioinformática del Instituto de Investigación de la Cadena Láctea CONICET-INTA on behalf of 'Proyecto Argentino Interinstitucional de genomica de SARS-CoV-2' (PAIS Consortium)	Eberhardt et al
Argentina/PAIS-E1008/2022	EPI_ISL_12030908	2022-03-04	Laboratorio Central de la Ciudad de Santa Fe	Grupo de Genómica y Bioinformática del Instituto de Investigación de la Cadena Láctea CONICET-INTA on behalf of 'Proyecto Argentino Interinstitucional de genomica de SARS-CoV-2' (PAIS Consortium)	Eberhardt et al
Argentina/PAIS-E1009/2022	EPI_ISL_12030909	2022-03-05	Laboratorio Central de la Ciudad de Santa Fe	Grupo de Genómica y Bioinformática del Instituto de Investigación de la Cadena Láctea CONICET-INTA on behalf of 'Proyecto Argentino Interinstitucional de genomica de SARS-CoV-2' (PAIS Consortium)	Eberhardt et al
Argentina/PAIS-E1010/2022	EPI_ISL_12030910	2022-03-08	Laboratorio Central de la Ciudad de Santa Fe	Grupo de Genómica y Bioinformática del Instituto de Investigación de la Cadena Láctea CONICET-INTA on behalf of 'Proyecto Argentino Interinstitucional de genomica de SARS-CoV-2' (PAIS Consortium)	Eberhardt et al
Argentina/PAIS-E1011/2022	EPI_ISL_12030911	2022-03-10	Laboratorio Central de la Ciudad de Santa Fe	Grupo de Genómica y Bioinformática del Instituto de Investigación de la Cadena Láctea CONICET-INTA on behalf of 'Proyecto Argentino Interinstitucional de genomica de SARS-CoV-2' (PAIS Consortium)	Eberhardt et al
Argentina/PAIS-E1012/2022	EPI_ISL_12030912	2022-03-11	Laboratorio Central de la Ciudad de Santa Fe	Grupo de Genómica y Bioinformática del Instituto de Investigación de la Cadena Láctea CONICET-INTA on behalf of 'Proyecto Argentino Interinstitucional de genomica de SARS-CoV-2' (PAIS Consortium)	Eberhardt et al
Argentina/PAIS-E1013/2022	EPI_ISL_12030913	2022-03-12	Laboratorio Central de la Ciudad de Santa Fe	Grupo de Genómica y Bioinformática del Instituto de Investigación de la Cadena Láctea CONICET-INTA on behalf of 'Proyecto Argentino Interinstitucional de genomica de SARS-CoV-2' (PAIS Consortium)	Eberhardt et al
Argentina/PAIS-E1014/2022	EPI_ISL_12030914	2022-03-13	Laboratorio Central de la Ciudad de Santa Fe	Grupo de Genómica y Bioinformática del Instituto de Investigación de la Cadena Láctea CONICET-INTA on behalf of 'Proyecto Argentino Interinstitucional de genomica de SARS-CoV-2' (PAIS Consortium)	Eberhardt et al
Argentina/PAIS-E1015/2022	EPI_ISL_12030915	2022-03-14	Laboratorio Central de la Ciudad de Santa Fe	Grupo de Genómica y Bioinformática del Instituto de Investigación de la Cadena Láctea CONICET-INTA on behalf of 'Proyecto Argentino Interinstitucional de genomica de SARS-CoV-2' (PAIS Consortium)	Eberhardt et al
Argentina/PAIS-E1017/2022	EPI_ISL_12030917	2022-03-15	Laboratorio Central de la Ciudad de Santa Fe	Grupo de Genómica y Bioinformática del Instituto de Investigación de la Cadena Láctea CONICET-INTA on behalf of 'Proyecto Argentino Interinstitucional de genomica de SARS-CoV-2' (PAIS Consortium)	Eberhardt et al
Argentina/PAIS-E1018/2022	EPI_ISL_12030918	2022-03-15	Laboratorio Central de la Ciudad de Santa Fe	Grupo de Genómica y Bioinformática del Instituto de Investigación de la Cadena Láctea CONICET-INTA on behalf of 'Proyecto Argentino Interinstitucional de genomica de SARS-CoV-2' (PAIS Consortium)	Eberhardt et al
Argentina/PAIS-E1019/2022	EPI_ISL_12030919	2022-03-15	Laboratorio Central de la Ciudad de Santa Fe	Grupo de Genómica y Bioinformática del Instituto de Investigación de la Cadena Láctea CONICET-INTA on behalf of 'Proyecto Argentino Interinstitucional de genomica de SARS-CoV-2' (PAIS Consortium)	Eberhardt et al
Argentina/PAIS-E1021/2022	EPI_ISL_12030920	2022-03-16	Laboratorio Central de la Ciudad de Santa Fe	Grupo de Genómica y Bioinformática del Instituto de Investigación de la Cadena Láctea CONICET-INTA on behalf of 'Proyecto Argentino Interinstitucional de genomica de SARS-CoV-2' (PAIS Consortium)	Eberhardt et al
Argentina/PAIS-E1022/2022	EPI_ISL_12030921	2022-03-18	Laboratorio Central de la Ciudad de Santa Fe	Grupo de Genómica y Bioinformática del Instituto de Investigación de la Cadena Láctea CONICET-INTA on behalf of 'Proyecto Argentino Interinstitucional de genomica de SARS-CoV-2' (PAIS Consortium)	Eberhardt et al
Argentina/PAIS-F0525/2022	EPI_ISL_12770952	2022-01-18	Laboratorio Central Mg. Luis Alfredo Pianciola	Laboratorio Central Mg. Luis Alfredo Pianciola on behalf of 'Proyecto Argentino Interinstitucional de genomica de SARS-CoV-2' (PAIS Consortium) and INEI-ANLIS 'Dr. Carlos G. Malbran'	L Pianciola et al
Argentina/PAIS-F0533/2022	EPI_ISL_12770958	2022-01-19	Laboratorio Central Mg. Luis Alfredo Pianciola	Laboratorio Central Mg. Luis Alfredo Pianciola on behalf of 'Proyecto Argentino Interinstitucional de genomica de SARS-CoV-2' (PAIS Consortium) and INEI-ANLIS 'Dr. Carlos G. Malbran'	L Pianciola et al
Argentina/PAIS-F0539/2022	EPI_ISL_12770962	2022-01-20	Laboratorio Central Mg. Luis Alfredo Pianciola	Laboratorio Central Mg. Luis Alfredo Pianciola on behalf of 'Proyecto Argentino Interinstitucional de genomica de SARS-CoV-2' (PAIS Consortium) and INEI-ANLIS 'Dr. Carlos G. Malbran'	L Pianciola et al
Argentina/PAIS-F0541/2022	EPI_ISL_12770964	2022-01-19	Laboratorio Central Mg. Luis Alfredo Pianciola	Laboratorio Central Mg. Luis Alfredo Pianciola on behalf of 'Proyecto Argentino Interinstitucional de genomica de SARS-CoV-2' (PAIS Consortium) and INEI-ANLIS 'Dr. Carlos G. Malbran'	L Pianciola et al
Argentina/PAIS-F0544/2022	EPI_ISL_12770967	2022-01-22	Laboratorio Central Mg. Luis Alfredo Pianciola	Laboratorio Central Mg. Luis Alfredo Pianciola on behalf of 'Proyecto Argentino Interinstitucional de genomica de SARS-CoV-2' (PAIS Consortium) and INEI-ANLIS 'Dr. Carlos G. Malbran'	L Pianciola et al
Argentina/PAIS-F0546/2022	EPI_ISL_12770969	2022-01-22	Laboratorio Central Mg. Luis Alfredo Pianciola	Laboratorio Central Mg. Luis Alfredo Pianciola on behalf of 'Proyecto Argentino Interinstitucional de genomica de SARS-CoV-2' (PAIS Consortium) and INEI-ANLIS 'Dr. Carlos G. Malbran'	L Pianciola et al
Argentina/PAIS-F0547/2022	EPI_ISL_12770970	2022-01-24	Laboratorio Central Mg. Luis Alfredo Pianciola	Laboratorio Central Mg. Luis Alfredo Pianciola on behalf of 'Proyecto Argentino Interinstitucional de genomica de SARS-CoV-2' (PAIS Consortium) and INEI-ANLIS 'Dr. Carlos G. Malbran'	L Pianciola et al
Argentina/PAIS-F0565/2022	EPI_ISL_12770984	2022-01-30	Laboratorio Central Mg. Luis Alfredo Pianciola	Laboratorio Central Mg. Luis Alfredo Pianciola on behalf of 'Proyecto Argentino Interinstitucional de genomica de SARS-CoV-2' (PAIS Consortium) and INEI-ANLIS 'Dr. Carlos G. Malbran'	L Pianciola et al
Argentina/PAIS-F0572/2022	EPI_ISL_12770989	2022-02-02	Laboratorio Central Mg. Luis Alfredo Pianciola	Laboratorio Central Mg. Luis Alfredo Pianciola on behalf of 'Proyecto Argentino Interinstitucional de genomica de SARS-CoV-2' (PAIS Consortium) and INEI-ANLIS 'Dr. Carlos G. Malbran'	L Pianciola et al
Argentina/PAIS-F0581/2022	EPI_ISL_12770995	2022-02-05	Laboratorio Central Mg. Luis Alfredo Pianciola	Laboratorio Central Mg. Luis Alfredo Pianciola on behalf of 'Proyecto Argentino Interinstitucional de genomica de SARS-CoV-2' (PAIS Consortium) and INEI-ANLIS 'Dr. Carlos G. Malbran'	L Pianciola et al
Argentina/PAIS-F0593/2022	EPI_ISL_12771006	2022-02-13	Laboratorio Central Mg. Luis Alfredo Pianciola	Laboratorio Central Mg. Luis Alfredo Pianciola on behalf of 'Proyecto Argentino Interinstitucional de genomica de SARS-CoV-2' (PAIS Consortium) and INEI-ANLIS 'Dr. Carlos G. Malbran'	L Pianciola et al
Argentina/PAIS-F0594/2022	EPI_ISL_12771007	2022-02-16	Laboratorio Central Mg. Luis Alfredo Pianciola	Laboratorio Central Mg. Luis Alfredo Pianciola on behalf of 'Proyecto Argentino Interinstitucional de genomica de SARS-CoV-2' (PAIS Consortium) and INEI-ANLIS 'Dr. Carlos G. Malbran'	L Pianciola et al
Argentina/PAIS-F0598/2022	EPI_ISL_12771011	2022-02-19	Laboratorio Central Mg. Luis Alfredo Pianciola	Laboratorio Central Mg. Luis Alfredo Pianciola on behalf of 'Proyecto Argentino Interinstitucional de genomica de SARS-CoV-2' (PAIS Consortium) and INEI-ANLIS 'Dr. Carlos G. Malbran'	L Pianciola et al
Argentina/PAIS-F0599/2022	EPI_ISL_12771012	2022-02-20	Laboratorio Central Mg. Luis Alfredo Pianciola	Laboratorio Central Mg. Luis Alfredo Pianciola on behalf of 'Proyecto Argentino Interinstitucional de genomica de SARS-CoV-2' (PAIS Consortium) and INEI-ANLIS 'Dr. Carlos G. Malbran'	L Pianciola et al
Argentina/PAIS-F0601/2022	EPI_ISL_12771014	2022-02-23	Laboratorio Central Mg. Luis Alfredo Pianciola	Laboratorio Central Mg. Luis Alfredo Pianciola on behalf of 'Proyecto Argentino Interinstitucional de genomica de SARS-CoV-2' (PAIS Consortium) and INEI-ANLIS 'Dr. Carlos G. Malbran'	L Pianciola et al
Argentina/PAIS-F0602/2022	EPI_ISL_12771015	2022-02-25	Laboratorio Central Mg. Luis Alfredo Pianciola	Laboratorio Central Mg. Luis Alfredo Pianciola on behalf of 'Proyecto Argentino Interinstitucional de genomica de SARS-CoV-2' (PAIS Consortium) and INEI-ANLIS 'Dr. Carlos G. Malbran'	L Pianciola et al
Argentina/PAIS-F0606/2022	EPI_ISL_12771019	2022-03-07	Laboratorio Central Mg. Luis Alfredo Pianciola	Laboratorio Central Mg. Luis Alfredo Pianciola on behalf of 'Proyecto Argentino Interinstitucional de genomica de SARS-CoV-2' (PAIS Consortium) and INEI-ANLIS 'Dr. Carlos G. Malbran'	L Pianciola et al
Argentina/PAIS-F0612/2022	EPI_ISL_12771024	2022-03-29	Laboratorio Central Mg. Luis Alfredo Pianciola	Laboratorio Central Mg. Luis Alfredo Pianciola on behalf of 'Proyecto Argentino Interinstitucional de genomica de SARS-CoV-2' (PAIS Consortium) and INEI-ANLIS 'Dr. Carlos G. Malbran'	L Pianciola et al
Argentina/PAIS-F0613/2022	EPI_ISL_12771025	2022-03-30	Laboratorio Central Mg. Luis Alfredo Pianciola	Laboratorio Central Mg. Luis Alfredo Pianciola on behalf of 'Proyecto Argentino Interinstitucional de genomica de SARS-CoV-2' (PAIS Consortium) and INEI-ANLIS 'Dr. Carlos G. Malbran'	L Pianciola et al
Argentina/PAIS-G0588/2021	EPI_ISL_8207542	2021-12-11	Laboratorio Central, Ministerio de Salud Córdoba	Fundacion para el Progreso de la Medicina and Instituto de Patologia Vegetal (IPAVE-CIAP-INTA) on behalf of 'Proyecto Argentino Interinstitucional de genomica de SARS-CoV-2' (PAIS Consortium)	Zeballos et al
Argentina/PAIS-G0611/2021	EPI_ISL_8207563	2021-12-13	Laboratorio Central, Ministerio de Salud Córdoba	Fundacion para el Progreso de la Medicina and Instituto de Patologia Vegetal (IPAVE-CIAP-INTA) on behalf of 'Proyecto Argentino Interinstitucional de genomica de SARS-CoV-2' (PAIS Consortium)	Zeballos et al
Argentina/PAIS-G0628/2021	EPI_ISL_8207578	2021-12-13	Laboratorio Central, Ministerio de Salud Córdoba	Fundacion para el Progreso de la Medicina and Instituto de Patologia Vegetal (IPAVE-CIAP-INTA) on behalf of 'Proyecto Argentino Interinstitucional de genomica de SARS-CoV-2' (PAIS Consortium)	Zeballos et al
Argentina/PAIS-G0630/2021	EPI_ISL_8207580	2021-12-13	Laboratorio Central, Ministerio de Salud Córdoba	Fundacion para el Progreso de la Medicina and Instituto de Patologia Vegetal (IPAVE-CIAP-INTA) on behalf of 'Proyecto Argentino Interinstitucional de genomica de SARS-CoV-2' (PAIS Consortium)	Zeballos et al
Argentina/PAIS-G0632/2021	EPI_ISL_8207582	2021-12-13	Laboratorio Central, Ministerio de Salud Córdoba	Fundacion para el Progreso de la Medicina and Instituto de Patologia Vegetal (IPAVE-CIAP-INTA) on behalf of 'Proyecto Argentino Interinstitucional de genomica de SARS-CoV-2' (PAIS Consortium)	Zeballos et al
Argentina/PAIS-G0656/2021	EPI_ISL_8207601	2021-12-13	Laboratorio Central, Ministerio de Salud Córdoba	Fundacion para el Progreso de la Medicina and Instituto de Patologia Vegetal (IPAVE-CIAP-INTA) on behalf of 'Proyecto Argentino Interinstitucional de genomica de SARS-CoV-2' (PAIS Consortium)	Zeballos et al
Argentina/PAIS-G0660/2021	EPI_ISL_8207605	2021-12-13	Laboratorio Central, Ministerio de Salud Córdoba	Fundacion para el Progreso de la Medicina and Instituto de Patologia Vegetal (IPAVE-CIAP-INTA) on behalf of 'Proyecto Argentino Interinstitucional de genomica de SARS-CoV-2' (PAIS Consortium)	Zeballos et al
Argentina/PAIS-G0661/2021	EPI_ISL_8207606	2021-12-13	Laboratorio Central, Ministerio de Salud Córdoba	Fundacion para el Progreso de la Medicina and Instituto de Patologia Vegetal (IPAVE-CIAP-INTA) on behalf of 'Proyecto Argentino Interinstitucional de genomica de SARS-CoV-2' (PAIS Consortium)	Zeballos et al
Argentina/PAIS-G0668/2021	EPI_ISL_8207613	2021-12-13	Laboratorio Central, Ministerio de Salud Córdoba	Fundacion para el Progreso de la Medicina and Instituto de Patologia Vegetal (IPAVE-CIAP-INTA) on behalf of 'Proyecto Argentino Interinstitucional de genomica de SARS-CoV-2' (PAIS Consortium)	Zeballos et al
Argentina/PAIS-G0706/2021	EPI_ISL_8938301	2021-12-27	Laboratorio Central, Ministerio de Salud Córdoba	Fundacion para el Progreso de la Medicina and Instituto de Patologia Vegetal (IPAVE-CIAP-INTA) on behalf of 'Proyecto Argentino Interinstitucional de genomica de SARS-CoV-2' (PAIS Consortium)	Zeballos et al
Argentina/PAIS-G0721/2021	EPI_ISL_8938310	2021-12-27	Laboratorio Central, Ministerio de Salud Córdoba	Fundacion para el Progreso de la Medicina and Instituto de Patologia Vegetal (IPAVE-CIAP-INTA) on behalf of 'Proyecto Argentino Interinstitucional de genomica de SARS-CoV-2' (PAIS Consortium)	Zeballos et al
Argentina/PAIS-G0764/2021	EPI_ISL_8938339	2021-12-20	Laboratorio Central, Ministerio de Salud Córdoba	Fundacion para el Progreso de la Medicina and Instituto de Patologia Vegetal (IPAVE-CIAP-INTA) on behalf of 'Proyecto Argentino Interinstitucional de genomica de SARS-CoV-2' (PAIS Consortium)	Zeballos et al
Argentina/PAIS-G0770/2021	EPI_ISL_8938341	2021-12-16	Laboratorio Central, Ministerio de Salud Córdoba	Fundacion para el Progreso de la Medicina and Instituto de Patologia Vegetal (IPAVE-CIAP-INTA) on behalf of 'Proyecto Argentino Interinstitucional de genomica de SARS-CoV-2' (PAIS Consortium)	Zeballos et al
Argentina/PAIS-G0779/2022	EPI_ISL_9507691	2022-01-06	Laboratorio Central de Salud Pública de la Provincia de Jujuy	Instituto de Patologia Vegetal (CIAP-INTA) on behalf of 'Proyecto Argentino Interinstitucional de genomica de SARS-CoV-2' (PAIS Consortium)	Fernández et al
Argentina/PAIS-G0781/2022	EPI_ISL_9507681	2022-01-07	Laboratorio Central de Salud Pública de la Provincia de Jujuy	Instituto de Patologia Vegetal (CIAP-INTA) on behalf of 'Proyecto Argentino Interinstitucional de genomica de SARS-CoV-2' (PAIS Consortium)	Fernández et al
Argentina/PAIS-G0808/2022	EPI_ISL_10252631	2022-01-24	Laboratorio Central, Ministerio de Salud Córdoba	Fundacion para el Progreso de la Medicina and Instituto de Patologia Vegetal (IPAVE-CIAP-INTA) on behalf of 'Proyecto Argentino Interinstitucional de genomica de SARS-CoV-2' (PAIS Consortium)	Zeballos et al
Argentina/PAIS-G0815/2022	EPI_ISL_10252639	2022-01-24	Laboratorio Central, Ministerio de Salud Córdoba	Fundacion para el Progreso de la Medicina and Instituto de Patologia Vegetal (IPAVE-CIAP-INTA) on behalf of 'Proyecto Argentino Interinstitucional de genomica de SARS-CoV-2' (PAIS Consortium)	Zeballos et al
Argentina/PAIS-G0817/2022	EPI_ISL_10252641	2022-01-24	Laboratorio Central, Ministerio de Salud Córdoba	Fundacion para el Progreso de la Medicina and Instituto de Patologia Vegetal (IPAVE-CIAP-INTA) on behalf of 'Proyecto Argentino Interinstitucional de genomica de SARS-CoV-2' (PAIS Consortium)	Zeballos et al
Argentina/PAIS-G0818/2022	EPI_ISL_10252642	2022-01-24	Laboratorio Central, Ministerio de Salud Córdoba	Fundacion para el Progreso de la Medicina and Instituto de Patologia Vegetal (IPAVE-CIAP-INTA) on behalf of 'Proyecto Argentino Interinstitucional de genomica de SARS-CoV-2' (PAIS Consortium)	Zeballos et al
Argentina/PAIS-G0821/2022	EPI_ISL_10252645	2022-01-24	Laboratorio Central, Ministerio de Salud Córdoba	Fundacion para el Progreso de la Medicina and Instituto de Patologia Vegetal (IPAVE-CIAP-INTA) on behalf of 'Proyecto Argentino Interinstitucional de genomica de SARS-CoV-2' (PAIS Consortium)	Zeballos et al
Argentina/PAIS-G0825/2022	EPI_ISL_10252649	2022-01-25	Laboratorio Central, Ministerio de Salud Córdoba	Fundacion para el Progreso de la Medicina and Instituto de Patologia Vegetal (IPAVE-CIAP-INTA) on behalf of 'Proyecto Argentino Interinstitucional de genomica de SARS-CoV-2' (PAIS Consortium)	Zeballos et al
Argentina/PAIS-G0829/2022	EPI_ISL_10252653	2022-01-25	Laboratorio Central, Ministerio de Salud Córdoba	Fundacion para el Progreso de la Medicina and Instituto de Patologia Vegetal (IPAVE-CIAP-INTA) on behalf of 'Proyecto Argentino Interinstitucional de genomica de SARS-CoV-2' (PAIS Consortium)	Zeballos et al
Argentina/PAIS-G0833/2022	EPI_ISL_10252657	2022-01-26	Laboratorio Central, Ministerio de Salud Córdoba	Fundacion para el Progreso de la Medicina and Instituto de Patologia Vegetal (IPAVE-CIAP-INTA) on behalf of 'Proyecto Argentino Interinstitucional de genomica de SARS-CoV-2' (PAIS Consortium)	Zeballos et al
Argentina/PAIS-G0846/2022	EPI_ISL_10252670	2022-01-27	Laboratorio Central, Ministerio de Salud Córdoba	Fundacion para el Progreso de la Medicina and Instituto de Patologia Vegetal (IPAVE-CIAP-INTA) on behalf of 'Proyecto Argentino Interinstitucional de genomica de SARS-CoV-2' (PAIS Consortium)	Zeballos et al
Argentina/PAIS-G0851/2022	EPI_ISL_10252675	2022-01-28	Laboratorio Central, Ministerio de Salud Córdoba	Fundacion para el Progreso de la Medicina and Instituto de Patologia Vegetal (IPAVE-CIAP-INTA) on behalf of 'Proyecto Argentino Interinstitucional de genomica de SARS-CoV-2' (PAIS Consortium)	Zeballos et al
Argentina/PAIS-G0852/2022	EPI_ISL_10252676	2022-01-28	Laboratorio Central, Ministerio de Salud Córdoba	Fundacion para el Progreso de la Medicina and Instituto de Patologia Vegetal (IPAVE-CIAP-INTA) on behalf of 'Proyecto Argentino Interinstitucional de genomica de SARS-CoV-2' (PAIS Consortium)	Zeballos et al
Argentina/PAIS-G0853/2022	EPI_ISL_10252677	2022-01-28	Laboratorio Central, Ministerio de Salud Córdoba	Fundacion para el Progreso de la Medicina and Instituto de Patologia Vegetal (IPAVE-CIAP-INTA) on behalf of 'Proyecto Argentino Interinstitucional de genomica de SARS-CoV-2' (PAIS Consortium)	Zeballos et al
Argentina/PAIS-G0854/2022	EPI_ISL_10252678	2022-01-28	Laboratorio Central, Ministerio de Salud Córdoba	Fundacion para el Progreso de la Medicina and Instituto de Patologia Vegetal (IPAVE-CIAP-INTA) on behalf of 'Proyecto Argentino Interinstitucional de genomica de SARS-CoV-2' (PAIS Consortium)	Zeballos et al
Argentina/PAIS-G0864/2022	EPI_ISL_10252687	2022-01-31	Laboratorio Central, Ministerio de Salud Córdoba	Fundacion para el Progreso de la Medicina and Instituto de Patologia Vegetal (IPAVE-CIAP-INTA) on behalf of 'Proyecto Argentino Interinstitucional de genomica de SARS-CoV-2' (PAIS Consortium)	Zeballos et al
Argentina/PAIS-G0867/2022	EPI_ISL_10252690	2022-01-31	Laboratorio Central, Ministerio de Salud Córdoba	Fundacion para el Progreso de la Medicina and Instituto de Patologia Vegetal (IPAVE-CIAP-INTA) on behalf of 'Proyecto Argentino Interinstitucional de genomica de SARS-CoV-2' (PAIS Consortium)	Zeballos et al
Argentina/PAIS-G0871/2022	EPI_ISL_10252694	2022-02-01	Laboratorio Central, Ministerio de Salud Córdoba	Fundacion para el Progreso de la Medicina and Instituto de Patologia Vegetal (IPAVE-CIAP-INTA) on behalf of 'Proyecto Argentino Interinstitucional de genomica de SARS-CoV-2' (PAIS Consortium)	Zeballos et al
Argentina/PAIS-G0872/2022	EPI_ISL_10252695	2022-02-01	Laboratorio Central, Ministerio de Salud Córdoba	Fundacion para el Progreso de la Medicina and Instituto de Patologia Vegetal (IPAVE-CIAP-INTA) on behalf of 'Proyecto Argentino Interinstitucional de genomica de SARS-CoV-2' (PAIS Consortium)	Zeballos et al
Argentina/PAIS-G0877/2022	EPI_ISL_10252700	2022-02-02	Laboratorio Central, Ministerio de Salud Córdoba	Fundacion para el Progreso de la Medicina and Instituto de Patologia Vegetal (IPAVE-CIAP-INTA) on behalf of 'Proyecto Argentino Interinstitucional de genomica de SARS-CoV-2' (PAIS Consortium)	Zeballos et al
Argentina/PAIS-G0879/2022	EPI_ISL_10252702	2022-02-02	Laboratorio Central, Ministerio de Salud Córdoba	Fundacion para el Progreso de la Medicina and Instituto de Patologia Vegetal (IPAVE-CIAP-INTA) on behalf of 'Proyecto Argentino Interinstitucional de genomica de SARS-CoV-2' (PAIS Consortium)	Zeballos et al
Argentina/PAIS-G0881/2022	EPI_ISL_10252704	2022-02-02	Laboratorio Central, Ministerio de Salud Córdoba	Fundacion para el Progreso de la Medicina and Instituto de Patologia Vegetal (IPAVE-CIAP-INTA) on behalf of 'Proyecto Argentino Interinstitucional de genomica de SARS-CoV-2' (PAIS Consortium)	Zeballos et al
Argentina/PAIS-G0883/2022	EPI_ISL_10252706	2022-02-02	Laboratorio Central, Ministerio de Salud Córdoba	Fundacion para el Progreso de la Medicina and Instituto de Patologia Vegetal (IPAVE-CIAP-INTA) on behalf of 'Proyecto Argentino Interinstitucional de genomica de SARS-CoV-2' (PAIS Consortium)	Zeballos et al
Argentina/PAIS-G0884/2022	EPI_ISL_10252707	2022-02-03	Laboratorio Central, Ministerio de Salud Córdoba	Fundacion para el Progreso de la Medicina and Instituto de Patologia Vegetal (IPAVE-CIAP-INTA) on behalf of 'Proyecto Argentino Interinstitucional de genomica de SARS-CoV-2' (PAIS Consortium)	Zeballos et al
Argentina/PAIS-G0903/2022	EPI_ISL_11809308	2022-02-08	Laboratorio Central, Ministerio de Salud Córdoba	Fundacion para el Progreso de la Medicina and Instituto de Patologia Vegetal (IPAVE-CIAP-INTA) on behalf of 'Proyecto Argentino Interinstitucional de genomica de SARS-CoV-2' (PAIS Consortium)	Zeballos et al
Argentina/PAIS-G0904/2022	EPI_ISL_11809309	2022-02-08	Laboratorio Central, Ministerio de Salud Córdoba	Fundacion para el Progreso de la Medicina and Instituto de Patologia Vegetal (IPAVE-CIAP-INTA) on behalf of 'Proyecto Argentino Interinstitucional de genomica de SARS-CoV-2' (PAIS Consortium)	Zeballos et al
Argentina/PAIS-G0907/2022	EPI_ISL_11809312	2022-02-08	Laboratorio Central, Ministerio de Salud Córdoba	Fundacion para el Progreso de la Medicina and Instituto de Patologia Vegetal (IPAVE-CIAP-INTA) on behalf of 'Proyecto Argentino Interinstitucional de genomica de SARS-CoV-2' (PAIS Consortium)	Zeballos et al
Argentina/PAIS-G0908/2022	EPI_ISL_11809313	2022-02-08	Laboratorio Central, Ministerio de Salud Córdoba	Fundacion para el Progreso de la Medicina and Instituto de Patologia Vegetal (IPAVE-CIAP-INTA) on behalf of 'Proyecto Argentino Interinstitucional de genomica de SARS-CoV-2' (PAIS Consortium)	Zeballos et al
Argentina/PAIS-G0910/2022	EPI_ISL_11809315	2022-02-08	Laboratorio Central, Ministerio de Salud Córdoba	Fundacion para el Progreso de la Medicina and Instituto de Patologia Vegetal (IPAVE-CIAP-INTA) on behalf of 'Proyecto Argentino Interinstitucional de genomica de SARS-CoV-2' (PAIS Consortium)	Zeballos et al
Argentina/PAIS-G0913/2022	EPI_ISL_11809318	2022-02-09	Laboratorio Central, Ministerio de Salud Córdoba	Fundacion para el Progreso de la Medicina and Instituto de Patologia Vegetal (IPAVE-CIAP-INTA) on behalf of 'Proyecto Argentino Interinstitucional de genomica de SARS-CoV-2' (PAIS Consortium)	Zeballos et al
Argentina/PAIS-G0917/2022	EPI_ISL_11809322	2022-02-10	Laboratorio Central, Ministerio de Salud Córdoba	Fundacion para el Progreso de la Medicina and Instituto de Patologia Vegetal (IPAVE-CIAP-INTA) on behalf of 'Proyecto Argentino Interinstitucional de genomica de SARS-CoV-2' (PAIS Consortium)	Zeballos et al
Argentina/PAIS-G0918/2022	EPI_ISL_11809323	2022-02-10	Laboratorio Central, Ministerio de Salud Córdoba	Fundacion para el Progreso de la Medicina and Instituto de Patologia Vegetal (IPAVE-CIAP-INTA) on behalf of 'Proyecto Argentino Interinstitucional de genomica de SARS-CoV-2' (PAIS Consortium)	Zeballos et al
Argentina/PAIS-G0921/2022	EPI_ISL_11809326	2022-02-11	Laboratorio Central, Ministerio de Salud Córdoba	Fundacion para el Progreso de la Medicina and Instituto de Patologia Vegetal (IPAVE-CIAP-INTA) on behalf of 'Proyecto Argentino Interinstitucional de genomica de SARS-CoV-2' (PAIS Consortium)	Zeballos et al
Argentina/PAIS-G0923/2022	EPI_ISL_11809328	2022-02-11	Laboratorio Central, Ministerio de Salud Córdoba	Fundacion para el Progreso de la Medicina and Instituto de Patologia Vegetal (IPAVE-CIAP-INTA) on behalf of 'Proyecto Argentino Interinstitucional de genomica de SARS-CoV-2' (PAIS Consortium)	Zeballos et al
Argentina/PAIS-G0925/2022	EPI_ISL_11809330	2022-02-11	Laboratorio Central, Ministerio de Salud Córdoba	Fundacion para el Progreso de la Medicina and Instituto de Patologia Vegetal (IPAVE-CIAP-INTA) on behalf of 'Proyecto Argentino Interinstitucional de genomica de SARS-CoV-2' (PAIS Consortium)	Zeballos et al
Argentina/PAIS-G0926/2022	EPI_ISL_11809331	2022-02-11	Laboratorio Central, Ministerio de Salud Córdoba	Fundacion para el Progreso de la Medicina and Instituto de Patologia Vegetal (IPAVE-CIAP-INTA) on behalf of 'Proyecto Argentino Interinstitucional de genomica de SARS-CoV-2' (PAIS Consortium)	Zeballos et al
Argentina/PAIS-G0927/2022	EPI_ISL_11809332	2022-02-12	Laboratorio Central, Ministerio de Salud Córdoba	Fundacion para el Progreso de la Medicina and Instituto de Patologia Vegetal (IPAVE-CIAP-INTA) on behalf of 'Proyecto Argentino Interinstitucional de genomica de SARS-CoV-2' (PAIS Consortium)	Zeballos et al
Argentina/PAIS-G0933/2022	EPI_ISL_11809338	2022-02-16	Laboratorio Central, Ministerio de Salud Córdoba	Fundacion para el Progreso de la Medicina and Instituto de Patologia Vegetal (IPAVE-CIAP-INTA) on behalf of 'Proyecto Argentino Interinstitucional de genomica de SARS-CoV-2' (PAIS Consortium)	Zeballos et al
Argentina/PAIS-G0934/2022	EPI_ISL_11809339	2022-02-16	Laboratorio Central, Ministerio de Salud Córdoba	Fundacion para el Progreso de la Medicina and Instituto de Patologia Vegetal (IPAVE-CIAP-INTA) on behalf of 'Proyecto Argentino Interinstitucional de genomica de SARS-CoV-2' (PAIS Consortium)	Zeballos et al
Argentina/PAIS-G0944/2022	EPI_ISL_11809348	2022-02-21	Laboratorio Central, Ministerio de Salud Córdoba	Fundacion para el Progreso de la Medicina and Instituto de Patologia Vegetal (IPAVE-CIAP-INTA) on behalf of 'Proyecto Argentino Interinstitucional de genomica de SARS-CoV-2' (PAIS Consortium)	Zeballos et al
Argentina/PAIS-G0945/2022	EPI_ISL_11809349	2022-02-21	Laboratorio Central, Ministerio de Salud Córdoba	Fundacion para el Progreso de la Medicina and Instituto de Patologia Vegetal (IPAVE-CIAP-INTA) on behalf of 'Proyecto Argentino Interinstitucional de genomica de SARS-CoV-2' (PAIS Consortium)	Zeballos et al
Argentina/PAIS-G0954/2022	EPI_ISL_11809358	2022-02-24	Laboratorio Central, Ministerio de Salud Córdoba	Fundacion para el Progreso de la Medicina and Instituto de Patologia Vegetal (IPAVE-CIAP-INTA) on behalf of 'Proyecto Argentino Interinstitucional de genomica de SARS-CoV-2' (PAIS Consortium)	Zeballos et al
Argentina/PAIS-G0955/2022	EPI_ISL_11809359	2022-02-24	Laboratorio Central, Ministerio de Salud Córdoba	Fundacion para el Progreso de la Medicina and Instituto de Patologia Vegetal (IPAVE-CIAP-INTA) on behalf of 'Proyecto Argentino Interinstitucional de genomica de SARS-CoV-2' (PAIS Consortium)	Zeballos et al
Argentina/PAIS-G0956/2022	EPI_ISL_11809360	2022-02-25	Laboratorio Central, Ministerio de Salud Córdoba	Fundacion para el Progreso de la Medicina and Instituto de Patologia Vegetal (IPAVE-CIAP-INTA) on behalf of 'Proyecto Argentino Interinstitucional de genomica de SARS-CoV-2' (PAIS Consortium)	Zeballos et al
Argentina/PAIS-G0960/2022	EPI_ISL_11809364	2022-02-26	Laboratorio Central, Ministerio de Salud Córdoba	Fundacion para el Progreso de la Medicina and Instituto de Patologia Vegetal (IPAVE-CIAP-INTA) on behalf of 'Proyecto Argentino Interinstitucional de genomica de SARS-CoV-2' (PAIS Consortium)	Zeballos et al
Argentina/PAIS-G0967/2022	EPI_ISL_11809370	2022-03-02	Laboratorio Central, Ministerio de Salud Córdoba	Fundacion para el Progreso de la Medicina and Instituto de Patologia Vegetal (IPAVE-CIAP-INTA) on behalf of 'Proyecto Argentino Interinstitucional de genomica de SARS-CoV-2' (PAIS Consortium)	Zeballos et al
Argentina/PAIS-G0972/2022	EPI_ISL_11809375	2022-03-04	Laboratorio Central, Ministerio de Salud Córdoba	Fundacion para el Progreso de la Medicina and Instituto de Patologia Vegetal (IPAVE-CIAP-INTA) on behalf of 'Proyecto Argentino Interinstitucional de genomica de SARS-CoV-2' (PAIS Consortium)	Zeballos et al
Argentina/PAIS-G0974/2022	EPI_ISL_11809377	2022-03-07	Laboratorio Central, Ministerio de Salud Córdoba	Fundacion para el Progreso de la Medicina and Instituto de Patologia Vegetal (IPAVE-CIAP-INTA) on behalf of 'Proyecto Argentino Interinstitucional de genomica de SARS-CoV-2' (PAIS Consortium)	Zeballos et al
Argentina/PAIS-G0983/2022	EPI_ISL_11809384	2022-03-15	Laboratorio Central, Ministerio de Salud Córdoba	Fundacion para el Progreso de la Medicina and Instituto de Patologia Vegetal (IPAVE-CIAP-INTA) on behalf of 'Proyecto Argentino Interinstitucional de genomica de SARS-CoV-2' (PAIS Consortium)	Zeballos et al
Argentina/PAIS-J00143/2021	EPI_ISL_8177268	2021-12-23	Laboratorio Central de Salud Publica	Laboratorio de Biología Molecular, Instituto de Medicina Regional on behalf of 'Proyecto Argentino Interinstitucional de genomica de SARS-CoV-2' (PAIS Consortium)	Verónica Gómez et al
Argentina/PAIS-J00159/2022	EPI_ISL_10411882	2022-01-18	Hosp. 4 de Junio Dr. Ramón Carrillo	Laboratorio de Biología Molecular, Instituto de Medicina Regional on behalf of 'Proyecto Argentino Interinstitucional de genomica de SARS-CoV-2' (PAIS Consortium)	Andrea Carolina Piedrabuena et al
Argentina/PAIS-J00166/2022	EPI_ISL_10411888	2022-02-14	Laboratorio Central de Salud Publica	Laboratorio de Biología Molecular, Instituto de Medicina Regional on behalf of 'Proyecto Argentino Interinstitucional de genomica de SARS-CoV-2' (PAIS Consortium)	Verónica Gómez et al
Argentina/PAIS-J00175/2022	EPI_ISL_11271224	2022-02-13	Servicio de Inmunología del Hospital Julio Perrando	Laboratorio de Biología Molecular, Instituto de Medicina Regional on behalf of 'Proyecto Argentino Interinstitucional de genomica de SARS-CoV-2' (PAIS Consortium)	María Delia Foussal et al
Argentina/PAIS-J00178/2022	EPI_ISL_11271227	2022-01-08	Laboratorio de Medicina Genómica	Laboratorio de Biología Molecular, Instituto de Medicina Regional on behalf of 'Proyecto Argentino Interinstitucional de genomica de SARS-CoV-2' (PAIS Consortium)	Florencia Ferrini et al
Argentina/PAIS-J00180/2022	EPI_ISL_11271229	2022-02-24	Laboratorio Central de Salud Publica	Laboratorio de Biología Molecular, Instituto de Medicina Regional on behalf of 'Proyecto Argentino Interinstitucional de genomica de SARS-CoV-2' (PAIS Consortium)	Verónica Gómez et al
Argentina/PAIS-J00181/2022	EPI_ISL_11271230	2022-02-24	Laboratorio Central de Salud Publica	Laboratorio de Biología Molecular, Instituto de Medicina Regional on behalf of 'Proyecto Argentino Interinstitucional de genomica de SARS-CoV-2' (PAIS Consortium)	Verónica Gómez et al
Argentina/PAIS-J00182/2022	EPI_ISL_11271231	2022-02-24	Laboratorio Central de Salud Publica	Laboratorio de Biología Molecular, Instituto de Medicina Regional on behalf of 'Proyecto Argentino Interinstitucional de genomica de SARS-CoV-2' (PAIS Consortium)	Verónica Gómez et al
Argentina/PAIS-J00183/2022	EPI_ISL_11271232	2022-03-07	Hosp. Pediatrico Dr. Avelino Castelán	Laboratorio de Biología Molecular, Instituto de Medicina Regional on behalf of 'Proyecto Argentino Interinstitucional de genomica de SARS-CoV-2' (PAIS Consortium)	María Andrea Gili et al
Argentina/PAIS-J00187/2022	EPI_ISL_12329717	2022-01-26	Laboratorio de Medicina Genómica	Laboratorio de Biología Molecular, Instituto de Medicina Regional on behalf of 'Proyecto Argentino Interinstitucional de genomica de SARS-CoV-2' (PAIS Consortium)	Florencia Ferrini et al
Argentina/PAIS-J00189/2022	EPI_ISL_12329718	2022-01-26	Laboratorio de Medicina Genómica	Laboratorio de Biología Molecular, Instituto de Medicina Regional on behalf of 'Proyecto Argentino Interinstitucional de genomica de SARS-CoV-2' (PAIS Consortium)	Florencia Ferrini et al
Argentina/PAIS-J00192/2022	EPI_ISL_12329721	2022-02-14	Hosp. 4 de Junio Dr. Ramón Carrillo	Laboratorio de Biología Molecular, Instituto de Medicina Regional on behalf of 'Proyecto Argentino Interinstitucional de genomica de SARS-CoV-2' (PAIS Consortium)	Andrea Carolina Piedrabuena et al
Argentina/PAIS-J00193/2022	EPI_ISL_12329722	2022-02-15	Hosp. 4 de Junio Dr. Ramón Carrillo	Laboratorio de Biología Molecular, Instituto de Medicina Regional on behalf of 'Proyecto Argentino Interinstitucional de genomica de SARS-CoV-2' (PAIS Consortium)	Andrea Carolina Piedrabuena et al
Argentina/PAIS-J00194/2022	EPI_ISL_12329723	2022-02-21	Hosp. 4 de Junio Dr. Ramón Carrillo	Laboratorio de Biología Molecular, Instituto de Medicina Regional on behalf of 'Proyecto Argentino Interinstitucional de genomica de SARS-CoV-2' (PAIS Consortium)	Andrea Carolina Piedrabuena et al
Argentina/PAIS-J00202/2022	EPI_ISL_12906836	2022-01-26	Laboratorio de Medicina Genómica	Laboratorio de Biología Molecular, Instituto de Medicina Regional on behalf of 'Proyecto Argentino Interinstitucional de genomica de SARS-CoV-2' (PAIS Consortium)	Florencia Ferrini et al
Argentina/PAIS-J00205/2022	EPI_ISL_12906838	2022-01-28	Laboratorio de Medicina Genómica	Laboratorio de Biología Molecular, Instituto de Medicina Regional on behalf of 'Proyecto Argentino Interinstitucional de genomica de SARS-CoV-2' (PAIS Consortium)	Florencia Ferrini et al
Armenia/IMB16-15/2022	EPI_ISL_9018812	2022-01-05	National Center of Disease Control and Prevention of the Republic of Armenia, Davidyants Laboratories, Yerevan, Armenia	Institute of Molecular Biology NAS RA, Republic of Armenia, Department of Bioengineering, BioinformaticsInstitute and Molecular Biology IBMPh RAU, Republic of Armenia	Arsen Arakelyan et al
Aruba/AW-RIVM-77673/2021	EPI_ISL_8586720	2021-12-17	Dutch COVID-19 response team	National Institute for Public Health and the Environment (RIVM)	Adam Meijer et al
Aruba/AW-RIVM-82593/2022	EPI_ISL_9184718	2022-01-08	Dutch COVID-19 response team	National Institute for Public Health and the Environment (RIVM)	Adam Meijer et al
Aruba/AW-RIVM-82601/2022	EPI_ISL_9184726	2022-01-08	Dutch COVID-19 response team	National Institute for Public Health and the Environment (RIVM)	Adam Meijer et al
Aruba/AW-RIVM-88570/2022	EPI_ISL_10696282	2022-02-13	Dutch COVID-19 response team	National Institute for Public Health and the Environment (RIVM)	Adam Meijer et al
Aruba/AW-RIVM-88571/2022	EPI_ISL_10696283	2022-02-13	Dutch COVID-19 response team	National Institute for Public Health and the Environment (RIVM)	Adam Meijer et al
Aruba/AW-RIVM-88573/2022	EPI_ISL_10696285	2022-02-18	Dutch COVID-19 response team	National Institute for Public Health and the Environment (RIVM)	Adam Meijer et al
Aruba/AW-RIVM-88575/2022	EPI_ISL_10696287	2022-02-18	Dutch COVID-19 response team	National Institute for Public Health and the Environment (RIVM)	Adam Meijer et al
Aruba/AW-RIVM-94721/2022	EPI_ISL_11839879	2022-03-21	Dutch COVID-19 response team	National Institute for Public Health and the Environment (RIVM)	Adam Meijer et al
Aruba/AW-RIVM-97420/2022	EPI_ISL_12550424	2022-03-29	Dutch COVID-19 response team	National Institute for Public Health and the Environment (RIVM)	Adam Meijer et al
Australia/ACT2006/2021	EPI_ISL_7016910	2021-12-02	ACT Pathology	Schwessinger Lab	Austin Bird et al
Australia/ACT2010/2021	EPI_ISL_7569944	2021-12-05	ACT Pathology	Schwessinger Lab	Austin Bird et al
Australia/ACT2024/2021	EPI_ISL_7569961	2021-12-05	ACT Pathology	Schwessinger Lab	Austin Bird et al
Australia/ACT2056/2021	EPI_ISL_7569985	2021-12-10	ACT Pathology	Schwessinger Lab	Austin Bird et al
Australia/ACT2596/2022	EPI_ISL_8768422	2022-01-02	ACT Pathology	Schwessinger Lab	Austin Bird et al
Australia/ACT2599/2022	EPI_ISL_8768425	2022-01-02	ACT Pathology	Schwessinger Lab	Austin Bird et al
Australia/ACT2655/2022	EPI_ISL_10009938	2022-01-04	ACT Pathology	Schwessinger Lab	Austin Bird et al
Australia/ACT2666/2022	EPI_ISL_10009945	2022-01-04	ACT Pathology	Schwessinger Lab	Austin Bird et al
Australia/ACT2758/2022	EPI_ISL_8768525	2022-01-11	ACT Pathology	Schwessinger Lab	Austin Bird et al
Australia/ACT2766/2022	EPI_ISL_8768533	2022-01-13	ACT Pathology	Schwessinger Lab	Austin Bird et al
Australia/ACT2801/2022	EPI_ISL_11686011	2022-01-15	ACT Pathology	Schwessinger Lab, Research School of Biology, College of Science	Austin Bird et al
Australia/ACT2816/2022	EPI_ISL_10009964	2022-01-15	ACT Pathology	Schwessinger Lab	Austin Bird et al
Australia/ACT2841/2022	EPI_ISL_10009985	2022-01-15	ACT Pathology	Schwessinger Lab	Austin Bird et al
Australia/ACT2844/2022	EPI_ISL_10009988	2022-01-15	ACT Pathology	Schwessinger Lab	Austin Bird et al
Australia/ACT2858/2022	EPI_ISL_10009999	2022-01-15	ACT Pathology	Schwessinger Lab	Austin Bird et al
Australia/ACT2872/2022	EPI_ISL_10010013	2022-01-15	ACT Pathology	Schwessinger Lab	Austin Bird et al
Australia/ACT2873/2022	EPI_ISL_10010014	2022-01-15	ACT Pathology	Schwessinger Lab	Austin Bird et al
Australia/ACT2891/2022	EPI_ISL_10010029	2022-01-16	ACT Pathology	Schwessinger Lab	Austin Bird et al
Australia/ACT2911/2022	EPI_ISL_10010048	2022-01-18	ACT Pathology	Schwessinger Lab	Austin Bird et al
Australia/ACT2930/2022	EPI_ISL_10010065	2022-01-18	ACT Pathology	Schwessinger Lab	Austin Bird et al
Australia/ACT3101/2022	EPI_ISL_10010218	2022-01-25	ACT Pathology	Schwessinger Lab	Austin Bird et al
Australia/ACT3207/2022	EPI_ISL_11686024	2022-01-30	ACT Pathology	Schwessinger Lab, Research School of Biology, College of Science	Austin Bird et al
Australia/ACT3251/2022	EPI_ISL_10010329	2022-02-01	ACT Pathology	Schwessinger Lab	Austin Bird et al
Australia/ACT3254/2022	EPI_ISL_10010332	2022-02-01	ACT Pathology	Schwessinger Lab	Austin Bird et al
Australia/ACT3257/2022	EPI_ISL_10010335	2022-02-01	ACT Pathology	Schwessinger Lab	Austin Bird et al
Australia/ACT3275/2022	EPI_ISL_11686027	2022-02-01	ACT Pathology	Schwessinger Lab, Research School of Biology, College of Science	Austin Bird et al
Australia/ACT3281/2022	EPI_ISL_10010358	2022-02-01	ACT Pathology	Schwessinger Lab	Austin Bird et al
Australia/ACT3334/2022	EPI_ISL_10010400	2022-02-06	ACT Pathology	Schwessinger Lab	Austin Bird et al
Australia/ACT3389/2022	EPI_ISL_10010446	2022-02-06	ACT Pathology	Schwessinger Lab	Austin Bird et al
Australia/ACT3442/2022	EPI_ISL_10010495	2022-02-08	ACT Pathology	Schwessinger Lab	Austin Bird et al
Australia/ACT3472/2022	EPI_ISL_10010521	2022-02-08	ACT Pathology	Schwessinger Lab	Austin Bird et al
Australia/ACT3483/2022	EPI_ISL_11656980	2022-02-15	ACT Pathology	Schwessinger Lab	Austin Bird et al
Australia/ACT3522/2022	EPI_ISL_11657416	2022-02-10	ACT Pathology	Schwessinger Lab	Austin Bird et al
Australia/ACT3529/2022	EPI_ISL_11656995	2022-02-13	ACT Pathology	Schwessinger Lab	Austin Bird et al
Australia/ACT3555/2022	EPI_ISL_11657010	2022-02-13	ACT Pathology	Schwessinger Lab	Austin Bird et al
Australia/ACT3570/2022	EPI_ISL_11657013	2022-02-13	ACT Pathology	Schwessinger Lab	Austin Bird et al
Australia/ACT3573/2022	EPI_ISL_11657016	2022-02-13	ACT Pathology	Schwessinger Lab	Austin Bird et al
Australia/ACT3579/2022	EPI_ISL_11657020	2022-02-13	ACT Pathology	Schwessinger Lab	Austin Bird et al
Australia/ACT3596/2022	EPI_ISL_11686049	2022-02-15	ACT Pathology	Schwessinger Lab, Research School of Biology, College of Science	Austin Bird et al
Australia/ACT3606/2022	EPI_ISL_11657030	2022-02-15	ACT Pathology	Schwessinger Lab	Austin Bird et al
Australia/ACT3620/2022	EPI_ISL_11657040	2022-02-15	ACT Pathology	Schwessinger Lab	Austin Bird et al
Australia/ACT3622/2022	EPI_ISL_11686054	2022-02-15	ACT Pathology	Schwessinger Lab, Research School of Biology, College of Science	Austin Bird et al
Australia/ACT3627/2022	EPI_ISL_11657045	2022-02-15	ACT Pathology	Schwessinger Lab	Austin Bird et al
Australia/ACT3629/2022	EPI_ISL_11657047	2022-02-15	ACT Pathology	Schwessinger Lab	Austin Bird et al
Australia/ACT3636/2022	EPI_ISL_11657048	2022-02-15	ACT Pathology	Schwessinger Lab	Austin Bird et al
Australia/ACT3648/2022	EPI_ISL_11657054	2022-02-17	ACT Pathology	Schwessinger Lab	Austin Bird et al
Australia/ACT3674/2022	EPI_ISL_11657071	2022-02-17	ACT Pathology	Schwessinger Lab	Austin Bird et al
Australia/ACT3679/2022	EPI_ISL_11657535	2022-02-17	ACT Pathology	Schwessinger Lab	Austin Bird et al
Australia/ACT3687/2022	EPI_ISL_11657076	2022-02-20	ACT Pathology	Schwessinger Lab	Austin Bird et al
Australia/ACT3692/2022	EPI_ISL_11657441	2022-02-20	ACT Pathology	Schwessinger Lab	Austin Bird et al
Australia/ACT3701/2022	EPI_ISL_11657332	2022-02-20	ACT Pathology	Schwessinger Lab	Austin Bird et al
Australia/ACT3714/2022	EPI_ISL_11657084	2022-02-20	ACT Pathology	Schwessinger Lab	Austin Bird et al
Australia/ACT3728/2022	EPI_ISL_11686059	2022-02-20	ACT Pathology	Schwessinger Lab, Research School of Biology, College of Science	Austin Bird et al
Australia/ACT3743/2022	EPI_ISL_11657096	2022-02-20	ACT Pathology	Schwessinger Lab	Austin Bird et al
Australia/ACT3748/2022	EPI_ISL_11686060	2022-02-20	ACT Pathology	Schwessinger Lab, Research School of Biology, College of Science	Austin Bird et al
Australia/ACT3750/2022	EPI_ISL_11657097	2022-02-20	ACT Pathology	Schwessinger Lab	Austin Bird et al
Australia/ACT3760/2022	EPI_ISL_11657099	2022-02-20	Capital Pathology	Schwessinger Lab	Austin Bird et al
Australia/ACT3769/2022	EPI_ISL_11657105	2022-02-20	Capital Pathology	Schwessinger Lab	Austin Bird et al
Australia/ACT3772/2022	EPI_ISL_11657106	2022-02-20	Capital Pathology	Schwessinger Lab	Austin Bird et al
Australia/ACT3785/2022	EPI_ISL_11657113	2022-02-20	Capital Pathology	Schwessinger Lab	Austin Bird et al
Australia/ACT3793/2022	EPI_ISL_11686062	2022-02-22	ACT Pathology	Schwessinger Lab, Research School of Biology, College of Science	Austin Bird et al
Australia/ACT3801/2022	EPI_ISL_11657119	2022-02-22	ACT Pathology	Schwessinger Lab	Austin Bird et al
Australia/ACT3817/2022	EPI_ISL_11657130	2022-02-22	ACT Pathology	Schwessinger Lab	Austin Bird et al
Australia/ACT3818/2022	EPI_ISL_11686063	2022-02-22	ACT Pathology	Schwessinger Lab, Research School of Biology, College of Science	Austin Bird et al
Australia/ACT3820/2022	EPI_ISL_11657131	2022-02-22	ACT Pathology	Schwessinger Lab	Austin Bird et al
Australia/ACT3825/2022	EPI_ISL_11657133	2022-02-22	ACT Pathology	Schwessinger Lab	Austin Bird et al
Australia/ACT3837/2022	EPI_ISL_11657138	2022-02-24	ACT Pathology	Schwessinger Lab	Austin Bird et al
Australia/ACT3854/2022	EPI_ISL_11657146	2022-02-24	ACT Pathology	Schwessinger Lab	Austin Bird et al
Australia/ACT3875/2022	EPI_ISL_11657152	2022-02-24	ACT Pathology	Schwessinger Lab	Austin Bird et al
Australia/ACT3877/2022	EPI_ISL_11657153	2022-02-24	ACT Pathology	Schwessinger Lab	Austin Bird et al
Australia/ACT3878/2022	EPI_ISL_11657154	2022-02-24	ACT Pathology	Schwessinger Lab	Austin Bird et al
Australia/ACT3890/2022	EPI_ISL_11657158	2022-02-24	Capital Pathology	Schwessinger Lab	Austin Bird et al
Australia/ACT3891/2022	EPI_ISL_11657159	2022-02-24	Capital Pathology	Schwessinger Lab	Austin Bird et al
Australia/ACT3937/2022	EPI_ISL_11657175	2022-02-27	ACT Pathology	Schwessinger Lab	Austin Bird et al
Australia/ACT3945/2022	EPI_ISL_11657178	2022-02-27	ACT Pathology	Schwessinger Lab	Austin Bird et al
Australia/ACT3950/2022	EPI_ISL_11686069	2022-02-27	ACT Pathology	Schwessinger Lab, Research School of Biology, College of Science	Austin Bird et al
Australia/ACT3955/2022	EPI_ISL_11686070	2022-02-27	ACT Pathology	Schwessinger Lab, Research School of Biology, College of Science	Austin Bird et al
Australia/ACT3969/2022	EPI_ISL_11657188	2022-02-27	ACT Pathology	Schwessinger Lab	Austin Bird et al
Australia/ACT3976/2022	EPI_ISL_11686076	2022-03-01	ACT Pathology	Schwessinger Lab, Research School of Biology, College of Science	Austin Bird et al
Australia/ACT3991/2022	EPI_ISL_11657193	2022-03-01	ACT Pathology	Schwessinger Lab	Austin Bird et al
Australia/ACT3996/2022	EPI_ISL_11657196	2022-03-01	ACT Pathology	Schwessinger Lab	Austin Bird et al
Australia/ACT4019/2022	EPI_ISL_11686079	2022-03-01	ACT Pathology	Schwessinger Lab, Research School of Biology, College of Science	Austin Bird et al
Australia/ACT4023/2022	EPI_ISL_11657208	2022-03-01	ACT Pathology	Schwessinger Lab	Austin Bird et al
Australia/ACT4033/2022	EPI_ISL_11657212	2022-03-01	ACT Pathology	Schwessinger Lab	Austin Bird et al
Australia/ACT4042/2022	EPI_ISL_11686080	2022-03-03	ACT Pathology	Schwessinger Lab, Research School of Biology, College of Science	Austin Bird et al
Australia/ACT4074/2022	EPI_ISL_11656683	2022-03-03	ACT Pathology	Schwessinger Lab	Austin Bird et al
Australia/ACT4087/2022	EPI_ISL_11657232	2022-03-06	ACT Pathology	Schwessinger Lab	Austin Bird et al
Australia/ACT4109/2022	EPI_ISL_11657238	2022-03-06	ACT Pathology	Schwessinger Lab	Austin Bird et al
Australia/ACT4146/2022	EPI_ISL_11657253	2022-03-06	ACT Pathology	Schwessinger Lab	Austin Bird et al
Australia/ACT4155/2022	EPI_ISL_11657256	2022-03-06	ACT Pathology	Schwessinger Lab	Austin Bird et al
Australia/ACT4158/2022	EPI_ISL_11686087	2022-03-06	ACT Pathology	Schwessinger Lab, Research School of Biology, College of Science	Austin Bird et al
Australia/ACT4159/2022	EPI_ISL_11657257	2022-03-06	Capital Pathology	Schwessinger Lab	Austin Bird et al
Australia/ACT4164/2022	EPI_ISL_11657472	2022-03-06	Capital Pathology	Schwessinger Lab	Austin Bird et al
Australia/ACT4167/2022	EPI_ISL_11657261	2022-03-06	Capital Pathology	Schwessinger Lab	Austin Bird et al
Australia/ACT4171/2022	EPI_ISL_11657263	2022-03-06	Capital Pathology	Schwessinger Lab	Austin Bird et al
Australia/ACT4178/2022	EPI_ISL_11657266	2022-03-06	Capital Pathology	Schwessinger Lab	Austin Bird et al
Australia/ACT4181/2022	EPI_ISL_11657267	2022-03-06	Capital Pathology	Schwessinger Lab	Austin Bird et al
Australia/ACT4191/2022	EPI_ISL_11657269	2022-03-06	Capital Pathology	Schwessinger Lab	Austin Bird et al
Australia/ACT4197/2022	EPI_ISL_11657274	2022-03-08	ACT Pathology	Schwessinger Lab	Austin Bird et al
Australia/ACT4231/2022	EPI_ISL_11657309	2022-03-08	ACT Pathology	Schwessinger Lab	Austin Bird et al
Australia/ACT4240/2022	EPI_ISL_11686088	2022-03-10	ACT Pathology	Schwessinger Lab, Research School of Biology, College of Science	Austin Bird et al
Australia/ACT4258/2022	EPI_ISL_11686092	2022-03-10	ACT Pathology	Schwessinger Lab, Research School of Biology, College of Science	Austin Bird et al
Australia/ACT4271/2022	EPI_ISL_11657285	2022-03-10	ACT Pathology	Schwessinger Lab	Austin Bird et al
Australia/ACT4274/2022	EPI_ISL_11657286	2022-03-10	ACT Pathology	Schwessinger Lab	Austin Bird et al
Australia/ACT4302/2022	EPI_ISL_11657512	2022-03-10	ACT Pathology	Schwessinger Lab	Austin Bird et al
Australia/ACT4320/2022	EPI_ISL_11657293	2022-03-13	ACT Pathology	Schwessinger Lab	Austin Bird et al
Australia/ACT4332/2022	EPI_ISL_11686099	2022-03-13	ACT Pathology	Schwessinger Lab, Research School of Biology, College of Science	Austin Bird et al
Australia/ACT4348/2022	EPI_ISL_11657298	2022-03-13	ACT Pathology	Schwessinger Lab	Austin Bird et al
Australia/ACT4405/2022	EPI_ISL_11686104	2022-03-15	ACT Pathology	Schwessinger Lab, Research School of Biology, College of Science	Austin Bird et al
Australia/ACT4559/2022	EPI_ISL_12433996	2022-03-22	ACT Pathology	Schwessinger Lab	Austin Bird et al
Australia/ACT4663/2022	EPI_ISL_12434073	2022-03-24	ACT Pathology	Schwessinger Lab	Austin Bird et al
Australia/ACT4697/2022	EPI_ISL_12434103	2022-03-27	ACT Pathology	Schwessinger Lab	Austin Bird et al
Australia/ACT4699/2022	EPI_ISL_12434104	2022-03-27	ACT Pathology	Schwessinger Lab	Austin Bird et al
Australia/ACT4767/2022	EPI_ISL_12434160	2022-03-29	ACT Pathology	Schwessinger Lab	Austin Bird et al
Australia/ACT4891/2022	EPI_ISL_12434262	2022-04-03	ACT Pathology	Schwessinger Lab	Austin Bird et al
Australia/ACT4903/2022	EPI_ISL_12434274	2022-04-03	Capital Pathology	Schwessinger Lab	Austin Bird et al
Australia/ACT4905/2022	EPI_ISL_12434275	2022-04-03	Capital Pathology	Schwessinger Lab	Austin Bird et al
Australia/ACT4908/2022	EPI_ISL_12434277	2022-04-03	Capital Pathology	Schwessinger Lab	Austin Bird et al
Australia/ACT4909/2022	EPI_ISL_12434278	2022-04-03	Capital Pathology	Schwessinger Lab	Austin Bird et al
Australia/ACT5017/2022	EPI_ISL_12434354	2022-04-10	ACT Pathology	Schwessinger Lab	Austin Bird et al
Australia/ACT5018/2022	EPI_ISL_12434355	2022-04-10	ACT Pathology	Schwessinger Lab	Austin Bird et al
Australia/ACT5019/2022	EPI_ISL_12434356	2022-04-10	ACT Pathology	Schwessinger Lab	Austin Bird et al
Australia/ACT5082/2022	EPI_ISL_12434400	2022-04-12	ACT Pathology	Schwessinger Lab	Austin Bird et al
Australia/ACT5096/2022	EPI_ISL_12434407	2022-04-12	ACT Pathology	Schwessinger Lab	Austin Bird et al
Australia/ACT5122/2022	EPI_ISL_12434427	2022-04-12	ACT Pathology	Schwessinger Lab	Austin Bird et al
Australia/ACT5123/2022	EPI_ISL_12434428	2022-04-12	ACT Pathology	Schwessinger Lab	Austin Bird et al
Australia/ACT5125/2022	EPI_ISL_12434430	2022-04-12	ACT Pathology	Schwessinger Lab	Austin Bird et al
Australia/ACT5180/2022	EPI_ISL_12434477	2022-04-17	ACT Pathology	Schwessinger Lab	Austin Bird et al
Australia/ACT5193/2022	EPI_ISL_12434486	2022-04-17	ACT Pathology	Schwessinger Lab	Austin Bird et al
Australia/NSW-ICPMR-14639/2021	EPI_ISL_6956014	2021-11-27	Pathology West - NSW Health Pathology	NSW Health Pathology - Institute of Clinical Pathology and Medical Research; Westmead Hospital; University of Sydney	Arnott A. et al
Australia/NSW-ICPMR-15554/2021	EPI_ISL_7265083	2021-11-30	Pathology North - Royal North Shore Hospital - NSW Health Pathology	NSW Health Pathology - Institute of Clinical Pathology and Medical Research; Westmead Hospital; University of Sydney	Arnott A. et al
Australia/NSW-ICPMR-15555/2021	EPI_ISL_7265084	2021-11-28	Pathology North - Royal North Shore Hospital - NSW Health Pathology	NSW Health Pathology - Institute of Clinical Pathology and Medical Research; Westmead Hospital; University of Sydney	Arnott A. et al
Australia/NSW-ICPMR-15702/2021	EPI_ISL_7265233	2021-12-01	St Vincent's Pathology (SydPath)	NSW Health Pathology - Institute of Clinical Pathology and Medical Research; Westmead Hospital; University of Sydney	Arnott A. et al
Australia/NSW-ICPMR-15705/2021	EPI_ISL_7265236	2021-12-02	Histopath	NSW Health Pathology - Institute of Clinical Pathology and Medical Research; Westmead Hospital; University of Sydney	Arnott A. et al
Australia/NSW-ICPMR-15706/2021	EPI_ISL_7265237	2021-12-02	Histopath	NSW Health Pathology - Institute of Clinical Pathology and Medical Research; Westmead Hospital; University of Sydney	Arnott A. et al
Australia/NSW-ICPMR-16917/2021	EPI_ISL_7748285	2021-12-07	Histopath	NSW Health Pathology - Institute of Clinical Pathology and Medical Research; Westmead Hospital; University of Sydney	Arnott A. et al
Australia/NSW-ICPMR-16978/2021	EPI_ISL_7748347	2021-12-08	Australian Clinical Labs (formerly Healthscope Pathology)	NSW Health Pathology - Institute of Clinical Pathology and Medical Research; Westmead Hospital; University of Sydney	Arnott A. et al
Australia/NSW-ICPMR-16991/2021	EPI_ISL_7748360	2021-12-07	Douglass Hanly Moir Pathology	NSW Health Pathology - Institute of Clinical Pathology and Medical Research; Westmead Hospital; University of Sydney	Arnott A. et al
Australia/NSW-ICPMR-17052/2021	EPI_ISL_7748451	2021-12-09	Laverty Pathology	NSW Health Pathology - Institute of Clinical Pathology and Medical Research; Westmead Hospital; University of Sydney	Arnott A. et al
Australia/NSW-ICPMR-18993/2022	EPI_ISL_8900908	2022-01-04	Pathology West - NSW Health Pathology	NSW Health Pathology - Institute of Clinical Pathology and Medical Research; Westmead Hospital; University of Sydney	Arnott A. et al
Australia/NSW-ICPMR-19049/2022	EPI_ISL_8900964	2022-01-07	Pathology West - NSW Health Pathology	NSW Health Pathology - Institute of Clinical Pathology and Medical Research; Westmead Hospital; University of Sydney	Arnott A. et al
Australia/NSW-ICPMR-19080/2022	EPI_ISL_8900995	2022-01-03	Pathology North - Royal North Shore Hospital - NSW Health Pathology	NSW Health Pathology - Institute of Clinical Pathology and Medical Research; Westmead Hospital; University of Sydney	Arnott A. et al
Australia/NSW-ICPMR-19104/2022	EPI_ISL_8901019	2022-01-06	Pathology West - NSW Health Pathology	NSW Health Pathology - Institute of Clinical Pathology and Medical Research; Westmead Hospital; University of Sydney	Arnott A. et al
Australia/NSW-ICPMR-19307/2021	EPI_ISL_8901222	2021-12-30	Pathology West - NSW Health Pathology	NSW Health Pathology - Institute of Clinical Pathology and Medical Research; Westmead Hospital; University of Sydney	Arnott A. et al
Australia/NSW-ICPMR-19363/2021	EPI_ISL_8901278	2021-12-30	Pathology West - NSW Health Pathology	NSW Health Pathology - Institute of Clinical Pathology and Medical Research; Westmead Hospital; University of Sydney	Arnott A. et al
Australia/NSW-ICPMR-19433/2021	EPI_ISL_8901348	2021-12-30	Pathology West - NSW Health Pathology	NSW Health Pathology - Institute of Clinical Pathology and Medical Research; Westmead Hospital; University of Sydney	Arnott A. et al
Australia/NSW-ICPMR-19460/2022	EPI_ISL_8901375	2022-01-01	Pathology West - NSW Health Pathology	NSW Health Pathology - Institute of Clinical Pathology and Medical Research; Westmead Hospital; University of Sydney	Arnott A. et al
Australia/NSW-ICPMR-19490/2022	EPI_ISL_8901405	2022-01-02	Pathology West - NSW Health Pathology	NSW Health Pathology - Institute of Clinical Pathology and Medical Research; Westmead Hospital; University of Sydney	Arnott A. et al
Australia/NSW-ICPMR-19508/2022	EPI_ISL_8901423	2022-01-15	Pathology West - NSW Health Pathology	NSW Health Pathology - Institute of Clinical Pathology and Medical Research; Westmead Hospital; University of Sydney	Arnott A. et al
Australia/NSW-ICPMR-19600/2022	EPI_ISL_9362986	2022-01-18	Pathology West - NSW Health Pathology	NSW Health Pathology - Institute of Clinical Pathology and Medical Research; Westmead Hospital; University of Sydney	Arnott A. et al
Australia/NSW-ICPMR-19606/2022	EPI_ISL_9363046	2022-01-17	Pathology West - NSW Health Pathology	NSW Health Pathology - Institute of Clinical Pathology and Medical Research; Westmead Hospital; University of Sydney	Arnott A. et al
Australia/NSW-ICPMR-19607/2022	EPI_ISL_9363235	2022-01-18	Pathology West - NSW Health Pathology	NSW Health Pathology - Institute of Clinical Pathology and Medical Research; Westmead Hospital; University of Sydney	Arnott A. et al
Australia/NSW-ICPMR-19621/2022	EPI_ISL_9362946	2022-01-04	Pathology West - NSW Health Pathology	NSW Health Pathology - Institute of Clinical Pathology and Medical Research; Westmead Hospital; University of Sydney	Arnott A. et al
Australia/NSW-ICPMR-19677/2022	EPI_ISL_9362981	2022-01-17	Pathology West - NSW Health Pathology	NSW Health Pathology - Institute of Clinical Pathology and Medical Research; Westmead Hospital; University of Sydney	Arnott A. et al
Australia/NSW-ICPMR-19753/2022	EPI_ISL_9362924	2022-01-18	Laverty Pathology	NSW Health Pathology - Institute of Clinical Pathology and Medical Research; Westmead Hospital; University of Sydney	Arnott A. et al
Australia/NSW-ICPMR-19768/2022	EPI_ISL_9363101	2022-01-21	Pathology West - NSW Health Pathology	NSW Health Pathology - Institute of Clinical Pathology and Medical Research; Westmead Hospital; University of Sydney	Arnott A. et al
Australia/NSW-ICPMR-19788/2022	EPI_ISL_9363009	2022-01-20	Pathology West - NSW Health Pathology	NSW Health Pathology - Institute of Clinical Pathology and Medical Research; Westmead Hospital; University of Sydney	Arnott A. et al
Australia/NSW-ICPMR-19803/2022	EPI_ISL_9362951	2022-01-05	Pathology West - NSW Health Pathology	NSW Health Pathology - Institute of Clinical Pathology and Medical Research; Westmead Hospital; University of Sydney	Arnott A. et al
Australia/NSW-ICPMR-19822/2022	EPI_ISL_9363028	2022-01-23	Pathology West - NSW Health Pathology	NSW Health Pathology - Institute of Clinical Pathology and Medical Research; Westmead Hospital; University of Sydney	Arnott A. et al
Australia/NSW-ICPMR-19833/2022	EPI_ISL_9363202	2022-01-14	Pathology West - NSW Health Pathology	NSW Health Pathology - Institute of Clinical Pathology and Medical Research; Westmead Hospital; University of Sydney	Arnott A. et al
Australia/NSW-ICPMR-19850/2022	EPI_ISL_9363134	2022-01-20	Pathology West - NSW Health Pathology	NSW Health Pathology - Institute of Clinical Pathology and Medical Research; Westmead Hospital; University of Sydney	Arnott A. et al
Australia/NSW-ICPMR-19884/2022	EPI_ISL_9362949	2022-01-04	Pathology West - NSW Health Pathology	NSW Health Pathology - Institute of Clinical Pathology and Medical Research; Westmead Hospital; University of Sydney	Arnott A. et al
Australia/NSW-ICPMR-19902/2022	EPI_ISL_9363197	2022-01-20	Pathology North - Royal North Shore Hospital - NSW Health Pathology	NSW Health Pathology - Institute of Clinical Pathology and Medical Research; Westmead Hospital; University of Sydney	Arnott A. et al
Australia/NSW-ICPMR-19918/2022	EPI_ISL_9499278	2022-01-11	Pathology West - NSW Health Pathology	NSW Health Pathology - Institute of Clinical Pathology and Medical Research; Westmead Hospital; University of Sydney	Arnott A. et al
Australia/NSW-ICPMR-19925/2022	EPI_ISL_9499228	2022-01-17	Pathology West - NSW Health Pathology	NSW Health Pathology - Institute of Clinical Pathology and Medical Research; Westmead Hospital; University of Sydney	Arnott A. et al
Australia/NSW-ICPMR-19958/2022	EPI_ISL_9499292	2022-01-30	Pathology West - NSW Health Pathology	NSW Health Pathology - Institute of Clinical Pathology and Medical Research; Westmead Hospital; University of Sydney	Arnott A. et al
Australia/NSW-ICPMR-19983/2022	EPI_ISL_9499244	2022-01-28	Pathology West - NSW Health Pathology	NSW Health Pathology - Institute of Clinical Pathology and Medical Research; Westmead Hospital; University of Sydney	Arnott A. et al
Australia/NSW-ICPMR-20020/2022	EPI_ISL_9499207	2022-01-22	Pathology West - NSW Health Pathology	NSW Health Pathology - Institute of Clinical Pathology and Medical Research; Westmead Hospital; University of Sydney	Arnott A. et al
Australia/NSW-ICPMR-20022/2022	EPI_ISL_9499328	2022-01-22	Pathology West - NSW Health Pathology	NSW Health Pathology - Institute of Clinical Pathology and Medical Research; Westmead Hospital; University of Sydney	Arnott A. et al
Australia/NSW-ICPMR-20026/2022	EPI_ISL_9499331	2022-01-27	Pathology West - NSW Health Pathology	NSW Health Pathology - Institute of Clinical Pathology and Medical Research; Westmead Hospital; University of Sydney	Arnott A. et al
Australia/NSW-ICPMR-20037/2022	EPI_ISL_9499337	2022-01-15	Pathology West - NSW Health Pathology	NSW Health Pathology - Institute of Clinical Pathology and Medical Research; Westmead Hospital; University of Sydney	Arnott A. et al
Australia/NSW-ICPMR-20052/2022	EPI_ISL_9499351	2022-01-29	Pathology West - NSW Health Pathology	NSW Health Pathology - Institute of Clinical Pathology and Medical Research; Westmead Hospital; University of Sydney	Arnott A. et al
Australia/NSW-ICPMR-20104/2022	EPI_ISL_9820925	2022-01-29	Pathology West - NSW Health Pathology	NSW Health Pathology - Institute of Clinical Pathology and Medical Research; Westmead Hospital; University of Sydney	Arnott A. et al
Australia/NSW-ICPMR-20105/2022	EPI_ISL_9820927	2022-01-29	Pathology West - NSW Health Pathology	NSW Health Pathology - Institute of Clinical Pathology and Medical Research; Westmead Hospital; University of Sydney	Arnott A. et al
Australia/NSW-ICPMR-20145/2022	EPI_ISL_9820968	2022-02-01	Pathology West - NSW Health Pathology	NSW Health Pathology - Institute of Clinical Pathology and Medical Research; Westmead Hospital; University of Sydney	Arnott A. et al
Australia/NSW-ICPMR-20161/2022	EPI_ISL_9820984	2022-02-01	Pathology West - NSW Health Pathology	NSW Health Pathology - Institute of Clinical Pathology and Medical Research; Westmead Hospital; University of Sydney	Arnott A. et al
Australia/NSW-ICPMR-20168/2022	EPI_ISL_9820992	2022-01-31	Pathology West - NSW Health Pathology	NSW Health Pathology - Institute of Clinical Pathology and Medical Research; Westmead Hospital; University of Sydney	Arnott A. et al
Australia/NSW-ICPMR-20174/2022	EPI_ISL_9820998	2022-01-31	Pathology West - NSW Health Pathology	NSW Health Pathology - Institute of Clinical Pathology and Medical Research; Westmead Hospital; University of Sydney	Arnott A. et al
Australia/NSW-ICPMR-20175/2022	EPI_ISL_9820999	2022-01-31	Pathology West - NSW Health Pathology	NSW Health Pathology - Institute of Clinical Pathology and Medical Research; Westmead Hospital; University of Sydney	Arnott A. et al
Australia/NSW-ICPMR-20180/2022	EPI_ISL_9821004	2022-01-31	Pathology West - NSW Health Pathology	NSW Health Pathology - Institute of Clinical Pathology and Medical Research; Westmead Hospital; University of Sydney	Arnott A. et al
Australia/NSW-ICPMR-20210/2022	EPI_ISL_9821035	2022-02-03	Pathology West - NSW Health Pathology	NSW Health Pathology - Institute of Clinical Pathology and Medical Research; Westmead Hospital; University of Sydney	Arnott A. et al
Australia/NSW-ICPMR-20234/2022	EPI_ISL_9821060	2022-02-01	Pathology West - NSW Health Pathology	NSW Health Pathology - Institute of Clinical Pathology and Medical Research; Westmead Hospital; University of Sydney	Arnott A. et al
Australia/NSW-ICPMR-20236/2022	EPI_ISL_9821062	2022-02-01	Pathology West - NSW Health Pathology	NSW Health Pathology - Institute of Clinical Pathology and Medical Research; Westmead Hospital; University of Sydney	Arnott A. et al
Australia/NSW-ICPMR-20296/2022	EPI_ISL_9821124	2022-02-01	Pathology West - NSW Health Pathology	NSW Health Pathology - Institute of Clinical Pathology and Medical Research; Westmead Hospital; University of Sydney	Arnott A. et al
Australia/NSW-ICPMR-20306/2022	EPI_ISL_9821134	2022-02-01	Pathology West - NSW Health Pathology	NSW Health Pathology - Institute of Clinical Pathology and Medical Research; Westmead Hospital; University of Sydney	Arnott A. et al
Australia/NSW-ICPMR-20408/2022	EPI_ISL_9821239	2022-02-06	Pathology West - NSW Health Pathology	NSW Health Pathology - Institute of Clinical Pathology and Medical Research; Westmead Hospital; University of Sydney	Arnott A. et al
Australia/NSW-ICPMR-20424/2022	EPI_ISL_10116633	2022-01-13	Australian Clinical Labs (formerly Healthscope Pathology)	Institute Of Clinical Pathology And Medical Research (ICPMR)	Arnott A. et al
Australia/NSW-ICPMR-20504/2022	EPI_ISL_10116713	2022-01-24	Pathology West - NSW Health Pathology	Institute Of Clinical Pathology And Medical Research (ICPMR)	Arnott A. et al
Australia/NSW-ICPMR-20506/2022	EPI_ISL_10116715	2022-01-24	Pathology West - NSW Health Pathology	Institute Of Clinical Pathology And Medical Research (ICPMR)	Arnott A. et al
Australia/NSW-ICPMR-20523/2022	EPI_ISL_10116732	2022-01-02	Laverty Pathology	Institute Of Clinical Pathology And Medical Research (ICPMR)	Arnott A. et al
Australia/NSW-ICPMR-20537/2022	EPI_ISL_10116746	2022-01-27	Pathology West - NSW Health Pathology	Institute Of Clinical Pathology And Medical Research (ICPMR)	Arnott A. et al
Australia/NSW-ICPMR-20702/2022	EPI_ISL_10116911	2022-02-10	Pathology West - NSW Health Pathology	Institute Of Clinical Pathology And Medical Research (ICPMR)	Arnott A. et al
Australia/NSW-ICPMR-20714/2022	EPI_ISL_10116923	2022-02-11	Pathology West - NSW Health Pathology	Institute Of Clinical Pathology And Medical Research (ICPMR)	Arnott A. et al
Australia/NSW-ICPMR-20726/2022	EPI_ISL_10116935	2022-02-12	Pathology West - NSW Health Pathology	Institute Of Clinical Pathology And Medical Research (ICPMR)	Arnott A. et al
Australia/NSW-ICPMR-20732/2022	EPI_ISL_10116941	2022-02-11	Pathology West - NSW Health Pathology	Institute Of Clinical Pathology And Medical Research (ICPMR)	Arnott A. et al
Australia/NSW-ICPMR-20757/2022	EPI_ISL_10116966	2022-02-13	Pathology West - NSW Health Pathology	Institute Of Clinical Pathology And Medical Research (ICPMR)	Arnott A. et al
Australia/NSW-ICPMR-20761/2022	EPI_ISL_10116970	2022-02-13	Pathology West - NSW Health Pathology	Institute Of Clinical Pathology And Medical Research (ICPMR)	Arnott A. et al
Australia/NSW-ICPMR-20810/2021	EPI_ISL_10432921	2021-12-07	Histopath	NSW Health Pathology - Institute of Clinical Pathology and Medical Research; Westmead Hospital; University of Sydney	Arnott A. et al
Australia/NSW-ICPMR-20857/2022	EPI_ISL_10432968	2022-02-13	Australian Clinical Labs (formerly Healthscope Pathology)	NSW Health Pathology - Institute of Clinical Pathology and Medical Research; Westmead Hospital; University of Sydney	Arnott A. et al
Australia/NSW-ICPMR-20939/2022	EPI_ISL_10433050	2022-02-15	Pathology West - NSW Health Pathology	NSW Health Pathology - Institute of Clinical Pathology and Medical Research; Westmead Hospital; University of Sydney	Arnott A. et al
Australia/NSW-ICPMR-20953/2022	EPI_ISL_10433064	2022-02-16	Pathology West - NSW Health Pathology	NSW Health Pathology - Institute of Clinical Pathology and Medical Research; Westmead Hospital; University of Sydney	Arnott A. et al
Australia/NSW-ICPMR-20967/2022	EPI_ISL_10433078	2022-02-13	4Cyte Pathology	NSW Health Pathology - Institute of Clinical Pathology and Medical Research; Westmead Hospital; University of Sydney	Arnott A. et al
Australia/NSW-ICPMR-20998/2022	EPI_ISL_10433109	2022-02-16	Pathology West - NSW Health Pathology	NSW Health Pathology - Institute of Clinical Pathology and Medical Research; Westmead Hospital; University of Sydney	Arnott A. et al
Australia/NSW-ICPMR-20999/2022	EPI_ISL_10433110	2022-02-17	Pathology West - NSW Health Pathology	NSW Health Pathology - Institute of Clinical Pathology and Medical Research; Westmead Hospital; University of Sydney	Arnott A. et al
Australia/NSW-ICPMR-21019/2022	EPI_ISL_10433130	2022-02-15	Australian Clinical Labs (formerly Healthscope Pathology)	NSW Health Pathology - Institute of Clinical Pathology and Medical Research; Westmead Hospital; University of Sydney	Arnott A. et al
Australia/NSW-ICPMR-21021/2022	EPI_ISL_10433132	2022-02-13	Histopath	NSW Health Pathology - Institute of Clinical Pathology and Medical Research; Westmead Hospital; University of Sydney	Arnott A. et al
Australia/NSW-ICPMR-21023/2022	EPI_ISL_10433134	2022-02-13	Histopath	NSW Health Pathology - Institute of Clinical Pathology and Medical Research; Westmead Hospital; University of Sydney	Arnott A. et al
Australia/NSW-ICPMR-21067/2022	EPI_ISL_10433178	2022-02-16	4Cyte Pathology	NSW Health Pathology - Institute of Clinical Pathology and Medical Research; Westmead Hospital; University of Sydney	Arnott A. et al
Australia/NSW-ICPMR-21069/2022	EPI_ISL_10433180	2022-02-15	Histopath	NSW Health Pathology - Institute of Clinical Pathology and Medical Research; Westmead Hospital; University of Sydney	Arnott A. et al
Australia/NSW-ICPMR-21129/2022	EPI_ISL_10433240	2022-02-19	Pathology West - NSW Health Pathology	NSW Health Pathology - Institute of Clinical Pathology and Medical Research; Westmead Hospital; University of Sydney	Arnott A. et al
Australia/NSW-ICPMR-21135/2022	EPI_ISL_10433246	2022-02-17	Histopath	NSW Health Pathology - Institute of Clinical Pathology and Medical Research; Westmead Hospital; University of Sydney	Arnott A. et al
Australia/NSW-ICPMR-21136/2022	EPI_ISL_10433247	2022-02-17	Histopath	NSW Health Pathology - Institute of Clinical Pathology and Medical Research; Westmead Hospital; University of Sydney	Arnott A. et al
Australia/NSW-ICPMR-21140/2022	EPI_ISL_10433251	2022-02-17	Histopath	NSW Health Pathology - Institute of Clinical Pathology and Medical Research; Westmead Hospital; University of Sydney	Arnott A. et al
Australia/NSW-ICPMR-21143/2022	EPI_ISL_10433254	2022-02-17	Histopath	NSW Health Pathology - Institute of Clinical Pathology and Medical Research; Westmead Hospital; University of Sydney	Arnott A. et al
Australia/NSW-ICPMR-21152/2022	EPI_ISL_10433263	2022-02-21	Pathology West - NSW Health Pathology	NSW Health Pathology - Institute of Clinical Pathology and Medical Research; Westmead Hospital; University of Sydney	Arnott A. et al
Australia/NSW-ICPMR-21161/2022	EPI_ISL_10433272	2022-02-18	4Cyte Pathology	NSW Health Pathology - Institute of Clinical Pathology and Medical Research; Westmead Hospital; University of Sydney	Arnott A. et al
Australia/NSW-ICPMR-21174/2022	EPI_ISL_10433285	2022-02-15	St Vincent's Pathology (SydPath)	NSW Health Pathology - Institute of Clinical Pathology and Medical Research; Westmead Hospital; University of Sydney	Arnott A. et al
Australia/NSW-ICPMR-21179/2022	EPI_ISL_10433290	2022-02-21	Pathology West - NSW Health Pathology	NSW Health Pathology - Institute of Clinical Pathology and Medical Research; Westmead Hospital; University of Sydney	Arnott A. et al
Australia/NSW-ICPMR-21181/2022	EPI_ISL_10433292	2022-02-21	Pathology West - NSW Health Pathology	NSW Health Pathology - Institute of Clinical Pathology and Medical Research; Westmead Hospital; University of Sydney	Arnott A. et al
Australia/NSW-ICPMR-21187/2022	EPI_ISL_10433298	2022-02-21	Pathology West - NSW Health Pathology	NSW Health Pathology - Institute of Clinical Pathology and Medical Research; Westmead Hospital; University of Sydney	Arnott A. et al
Australia/NSW-ICPMR-21217/2022	EPI_ISL_10433328	2022-02-19	Douglass Hanly Moir Pathology	NSW Health Pathology - Institute of Clinical Pathology and Medical Research; Westmead Hospital; University of Sydney	Arnott A. et al
Australia/NSW-ICPMR-21232/2022	EPI_ISL_10433343	2022-02-18	Pathology North - Hunter - NSW Health Pathology	NSW Health Pathology - Institute of Clinical Pathology and Medical Research; Westmead Hospital; University of Sydney	Arnott A. et al
Australia/NSW-ICPMR-21240/2022	EPI_ISL_10433351	2022-02-20	Laverty Pathology	NSW Health Pathology - Institute of Clinical Pathology and Medical Research; Westmead Hospital; University of Sydney	Arnott A. et al
Australia/NSW-ICPMR-21293/2022	EPI_ISL_10672729	2022-02-19	4Cyte Pathology	NSW Health Pathology - Institute of Clinical Pathology and Medical Research; Westmead Hospital; University of Sydney	Arnott A. et al
Australia/NSW-ICPMR-21322/2022	EPI_ISL_10672803	2022-02-22	Histopath	NSW Health Pathology - Institute of Clinical Pathology and Medical Research; Westmead Hospital; University of Sydney	Arnott A. et al
Australia/NSW-ICPMR-21323/2022	EPI_ISL_10672684	2022-02-21	Histopath	NSW Health Pathology - Institute of Clinical Pathology and Medical Research; Westmead Hospital; University of Sydney	Arnott A. et al
Australia/NSW-ICPMR-21328/2022	EPI_ISL_10672685	2022-02-21	Histopath	NSW Health Pathology - Institute of Clinical Pathology and Medical Research; Westmead Hospital; University of Sydney	Arnott A. et al
Australia/NSW-ICPMR-21330/2022	EPI_ISL_10672686	2022-02-21	Histopath	NSW Health Pathology - Institute of Clinical Pathology and Medical Research; Westmead Hospital; University of Sydney	Arnott A. et al
Australia/NSW-ICPMR-21360/2022	EPI_ISL_10672769	2022-02-21	Laverty Pathology	NSW Health Pathology - Institute of Clinical Pathology and Medical Research; Westmead Hospital; University of Sydney	Arnott A. et al
Australia/NSW-ICPMR-21373/2022	EPI_ISL_10672814	2022-02-21	St Vincent's Pathology (SydPath)	NSW Health Pathology - Institute of Clinical Pathology and Medical Research; Westmead Hospital; University of Sydney	Arnott A. et al
Australia/NSW-ICPMR-21379/2022	EPI_ISL_10672779	2022-02-25	Pathology West - NSW Health Pathology	NSW Health Pathology - Institute of Clinical Pathology and Medical Research; Westmead Hospital; University of Sydney	Arnott A. et al
Australia/NSW-ICPMR-21380/2022	EPI_ISL_10672708	2022-02-25	Pathology West - NSW Health Pathology	NSW Health Pathology - Institute of Clinical Pathology and Medical Research; Westmead Hospital; University of Sydney	Arnott A. et al
Australia/NSW-ICPMR-21463/2022	EPI_ISL_10730230	2022-02-27	Pathology West - NSW Health Pathology	NSW Health Pathology - Institute of Clinical Pathology and Medical Research; Westmead Hospital; University of Sydney	Arnott A. et al
Australia/NSW-ICPMR-21468/2022	EPI_ISL_10730233	2022-02-28	Pathology West - NSW Health Pathology	NSW Health Pathology - Institute of Clinical Pathology and Medical Research; Westmead Hospital; University of Sydney	Arnott A. et al
Australia/NSW-ICPMR-21512/2022	EPI_ISL_10730405	2022-02-24	Laverty Pathology	NSW Health Pathology - Institute of Clinical Pathology and Medical Research; Westmead Hospital; University of Sydney	Arnott A. et al
Australia/NSW-ICPMR-21520/2022	EPI_ISL_10730415	2022-02-23	Sydney South West Pathology Service (SSWPS) - Liverpool Hospital - NSW Health Pathology	NSW Health Pathology - Institute of Clinical Pathology and Medical Research; Westmead Hospital; University of Sydney	Arnott A. et al
Australia/NSW-ICPMR-21571/2022	EPI_ISL_10730268	2022-01-11	Sydney South West Pathology Service (SSWPS) - Concord Repatriation General Hospital - NSW Health Pathology	NSW Health Pathology - Institute of Clinical Pathology and Medical Research; Westmead Hospital; University of Sydney	Arnott A. et al
Australia/NSW-ICPMR-21628/2022	EPI_ISL_10730313	2022-02-27	Southern. IML Pathology	NSW Health Pathology - Institute of Clinical Pathology and Medical Research; Westmead Hospital; University of Sydney	Arnott A. et al
Australia/NSW-ICPMR-21630/2022	EPI_ISL_10730334	2022-02-27	Histopath	NSW Health Pathology - Institute of Clinical Pathology and Medical Research; Westmead Hospital; University of Sydney	Arnott A. et al
Australia/NSW-ICPMR-21654/2022	EPI_ISL_10730270	2022-03-01	Histopath	NSW Health Pathology - Institute of Clinical Pathology and Medical Research; Westmead Hospital; University of Sydney	Arnott A. et al
Australia/NSW-ICPMR-21657/2022	EPI_ISL_10730332	2022-03-03	Pathology West - NSW Health Pathology	NSW Health Pathology - Institute of Clinical Pathology and Medical Research; Westmead Hospital; University of Sydney	Arnott A. et al
Australia/NSW-ICPMR-21674/2022	EPI_ISL_10848540	2022-03-04	Pathology West - NSW Health Pathology	NSW Health Pathology - Institute of Clinical Pathology and Medical Research; Westmead Hospital; University of Sydney	Arnott A. et al
Australia/NSW-ICPMR-21696/2022	EPI_ISL_10848564	2022-02-28	4Cyte Pathology	NSW Health Pathology - Institute of Clinical Pathology and Medical Research; Westmead Hospital; University of Sydney	Arnott A. et al
Australia/NSW-ICPMR-21702/2022	EPI_ISL_10848570	2022-03-01	4Cyte Pathology	NSW Health Pathology - Institute of Clinical Pathology and Medical Research; Westmead Hospital; University of Sydney	Arnott A. et al
Australia/NSW-ICPMR-21723/2022	EPI_ISL_10848591	2022-02-26	Medlab Pathology	NSW Health Pathology - Institute of Clinical Pathology and Medical Research; Westmead Hospital; University of Sydney	Arnott A. et al
Australia/NSW-ICPMR-21749/2022	EPI_ISL_10848618	2022-03-01	Australian Clinical Labs (formerly Healthscope Pathology)	NSW Health Pathology - Institute of Clinical Pathology and Medical Research; Westmead Hospital; University of Sydney	Arnott A. et al
Australia/NSW-ICPMR-21791/2022	EPI_ISL_10848662	2022-03-03	Douglass Hanly Moir Pathology	NSW Health Pathology - Institute of Clinical Pathology and Medical Research; Westmead Hospital; University of Sydney	Arnott A. et al
Australia/NSW-ICPMR-21814/2022	EPI_ISL_10999475	2022-03-07	Pathology West - NSW Health Pathology	NSW Health Pathology - Institute of Clinical Pathology and Medical Research, Westmead Hospital	Arnott A. et al
Australia/NSW-ICPMR-21825/2022	EPI_ISL_10999487	2022-03-05	Histopath Diagnostic Specialists	NSW Health Pathology - Institute of Clinical Pathology and Medical Research, Westmead Hospital	Arnott A. et al
Australia/NSW-ICPMR-21898/2022	EPI_ISL_10999560	2022-03-07	Australian Clinical Labs (formerly Healthscope Pathology)	NSW Health Pathology - Institute of Clinical Pathology and Medical Research, Westmead Hospital	Arnott A. et al
Australia/NSW-ICPMR-21953/2022	EPI_ISL_10982399	2022-03-10	Pathology West - NSW Health Pathology	NSW Health Pathology - Institute of Clinical Pathology and Medical Research (ICPMR), Westmead Hospital	Arnott A. et al
Australia/NSW-ICPMR-21974/2022	EPI_ISL_10982420	2022-03-06	Sydney South West Pathology Service (SSWPS) - Concord Repatriation General Hospital - NSW Health Pathology	NSW Health Pathology - Institute of Clinical Pathology and Medical Research (ICPMR), Westmead Hospital	Arnott A. et al
Australia/NSW-ICPMR-21980/2022	EPI_ISL_10982426	2022-03-07	Sydney South West Pathology Service (SSWPS) - Concord Repatriation General Hospital - NSW Health Pathology	NSW Health Pathology - Institute of Clinical Pathology and Medical Research (ICPMR), Westmead Hospital	Arnott A. et al
Australia/NSW-ICPMR-22027/2022	EPI_ISL_10982473	2022-03-10	Pathology West - NSW Health Pathology	NSW Health Pathology - Institute of Clinical Pathology and Medical Research (ICPMR), Westmead Hospital	Arnott A. et al
Australia/NSW-ICPMR-22028/2022	EPI_ISL_10982474	2022-03-10	Pathology West - NSW Health Pathology	NSW Health Pathology - Institute of Clinical Pathology and Medical Research (ICPMR), Westmead Hospital	Arnott A. et al
Australia/NSW-ICPMR-22095/2022	EPI_ISL_11041330	2022-03-04	Laverty Pathology	NSW Health Pathology - Institute of Clinical Pathology and Medical Research; Westmead Hospital; University of Sydney	Arnott A. et al
Australia/NSW-ICPMR-22147/2022	EPI_ISL_11041339	2022-03-10	Laverty Pathology	NSW Health Pathology - Institute of Clinical Pathology and Medical Research; Westmead Hospital; University of Sydney	Arnott A. et al
Australia/NSW-ICPMR-22174/2022	EPI_ISL_11170451	2022-03-09	Histopath	NSW Health Pathology - Institute of Clinical Pathology and Medical Research; Westmead Hospital; University of Sydney	Arnott A. et al
Australia/NSW-ICPMR-22183/2022	EPI_ISL_11170460	2022-03-11	Histopath	NSW Health Pathology - Institute of Clinical Pathology and Medical Research; Westmead Hospital; University of Sydney	Arnott A. et al
Australia/NSW-ICPMR-22206/2022	EPI_ISL_11170483	2022-02-12	Pathology North - Hunter - NSW Health Pathology	NSW Health Pathology - Institute of Clinical Pathology and Medical Research; Westmead Hospital; University of Sydney	Arnott A. et al
Australia/NSW-ICPMR-22216/2022	EPI_ISL_11170493	2022-03-11	Histopath	NSW Health Pathology - Institute of Clinical Pathology and Medical Research; Westmead Hospital; University of Sydney	Arnott A. et al
Australia/NSW-ICPMR-22273/2022	EPI_ISL_11525027	2022-03-08	4Cyte Pathology	NSW Health Pathology - Institute of Clinical Pathology and Medical Research; Westmead Hospital; University of Sydney	Arnott A. et al
Australia/NSW-ICPMR-22286/2022	EPI_ISL_11524831	2022-03-12	Histopath	NSW Health Pathology - Institute of Clinical Pathology and Medical Research; Westmead Hospital; University of Sydney	Arnott A. et al
Australia/NSW-ICPMR-22297/2022	EPI_ISL_11524832	2022-03-11	Southern. IML Pathology	NSW Health Pathology - Institute of Clinical Pathology and Medical Research; Westmead Hospital; University of Sydney	Arnott A. et al
Australia/NSW-ICPMR-22309/2022	EPI_ISL_11524835	2022-03-16	Pathology West - NSW Health Pathology	NSW Health Pathology - Institute of Clinical Pathology and Medical Research; Westmead Hospital; University of Sydney	Arnott A. et al
Australia/NSW-ICPMR-22345/2022	EPI_ISL_11525107	2022-03-12	St Vincent's Pathology (SydPath)	NSW Health Pathology - Institute of Clinical Pathology and Medical Research; Westmead Hospital; University of Sydney	Arnott A. et al
Australia/NSW-ICPMR-22349/2022	EPI_ISL_11524844	2022-03-16	Pathology West - NSW Health Pathology	NSW Health Pathology - Institute of Clinical Pathology and Medical Research; Westmead Hospital; University of Sydney	Arnott A. et al
Australia/NSW-ICPMR-22399/2022	EPI_ISL_11524944	2022-03-14	Histopath	NSW Health Pathology - Institute of Clinical Pathology and Medical Research; Westmead Hospital; University of Sydney	Arnott A. et al
Australia/NSW-ICPMR-22402/2022	EPI_ISL_11524851	2022-03-14	Histopath	NSW Health Pathology - Institute of Clinical Pathology and Medical Research; Westmead Hospital; University of Sydney	Arnott A. et al
Australia/NSW-ICPMR-22479/2022	EPI_ISL_11524861	2022-03-19	Pathology West - NSW Health Pathology	NSW Health Pathology - Institute of Clinical Pathology and Medical Research; Westmead Hospital; University of Sydney	Arnott A. et al
Australia/NSW-ICPMR-22480/2022	EPI_ISL_11524862	2022-03-19	Pathology West - NSW Health Pathology	NSW Health Pathology - Institute of Clinical Pathology and Medical Research; Westmead Hospital; University of Sydney	Arnott A. et al
Australia/NSW-ICPMR-22520/2022	EPI_ISL_11524868	2022-03-16	Australian Clinical Labs (formerly Healthscope Pathology)	NSW Health Pathology - Institute of Clinical Pathology and Medical Research; Westmead Hospital; University of Sydney	Arnott A. et al
Australia/NSW-ICPMR-22530/2022	EPI_ISL_11525059	2022-03-16	Histopath	NSW Health Pathology - Institute of Clinical Pathology and Medical Research; Westmead Hospital; University of Sydney	Arnott A. et al
Australia/NSW-ICPMR-22531/2022	EPI_ISL_11524870	2022-03-16	Histopath	NSW Health Pathology - Institute of Clinical Pathology and Medical Research; Westmead Hospital; University of Sydney	Arnott A. et al
Australia/NSW-ICPMR-22536/2022	EPI_ISL_11524871	2022-03-16	Histopath	NSW Health Pathology - Institute of Clinical Pathology and Medical Research; Westmead Hospital; University of Sydney	Arnott A. et al
Australia/NSW-ICPMR-22556/2022	EPI_ISL_11525146	2022-03-20	Pathology West - NSW Health Pathology	NSW Health Pathology - Institute of Clinical Pathology and Medical Research; Westmead Hospital; University of Sydney	Arnott A. et al
Australia/NSW-ICPMR-22582/2022	EPI_ISL_11651851	2022-03-13	4Cyte Pathology	NSW Health Pathology - Institute of Clinical Pathology and Medical Research; Westmead Hospital; University of Sydney	Arnott A. et al
Australia/NSW-ICPMR-22588/2022	EPI_ISL_11651857	2022-03-15	4Cyte Pathology	NSW Health Pathology - Institute of Clinical Pathology and Medical Research; Westmead Hospital; University of Sydney	Arnott A. et al
Australia/NSW-ICPMR-22591/2022	EPI_ISL_11651860	2022-03-16	4Cyte Pathology	NSW Health Pathology - Institute of Clinical Pathology and Medical Research; Westmead Hospital; University of Sydney	Arnott A. et al
Australia/NSW-ICPMR-22603/2022	EPI_ISL_11651873	2022-03-15	Douglass Hanly Moir Pathology	NSW Health Pathology - Institute of Clinical Pathology and Medical Research; Westmead Hospital; University of Sydney	Arnott A. et al
Australia/NSW-ICPMR-22608/2022	EPI_ISL_11651879	2022-03-17	Douglass Hanly Moir Pathology	NSW Health Pathology - Institute of Clinical Pathology and Medical Research; Westmead Hospital; University of Sydney	Arnott A. et al
Australia/NSW-ICPMR-22617/2022	EPI_ISL_11651888	2022-03-21	Pathology West - NSW Health Pathology	NSW Health Pathology - Institute of Clinical Pathology and Medical Research; Westmead Hospital; University of Sydney	Arnott A. et al
Australia/NSW-ICPMR-22646/2022	EPI_ISL_11651918	2022-03-17	Laverty Pathology	NSW Health Pathology - Institute of Clinical Pathology and Medical Research; Westmead Hospital; University of Sydney	Arnott A. et al
Australia/NSW-ICPMR-22655/2022	EPI_ISL_11651928	2022-03-13	4Cyte Pathology	NSW Health Pathology - Institute of Clinical Pathology and Medical Research; Westmead Hospital; University of Sydney	Arnott A. et al
Australia/NSW-ICPMR-22656/2022	EPI_ISL_11651929	2022-03-21	Pathology West - NSW Health Pathology	NSW Health Pathology - Institute of Clinical Pathology and Medical Research; Westmead Hospital; University of Sydney	Arnott A. et al
Australia/NSW-ICPMR-22687/2022	EPI_ISL_11651960	2022-03-19	4Cyte Pathology	NSW Health Pathology - Institute of Clinical Pathology and Medical Research; Westmead Hospital; University of Sydney	Arnott A. et al
Australia/NSW-ICPMR-22701/2022	EPI_ISL_11651975	2022-03-18	Laverty Pathology	NSW Health Pathology - Institute of Clinical Pathology and Medical Research; Westmead Hospital; University of Sydney	Arnott A. et al
Australia/NSW-ICPMR-22726/2022	EPI_ISL_11652001	2022-03-23	Pathology West - NSW Health Pathology	NSW Health Pathology - Institute of Clinical Pathology and Medical Research; Westmead Hospital; University of Sydney	Arnott A. et al
Australia/NSW-ICPMR-22748/2022	EPI_ISL_11652025	2022-03-21	Pathology West - NSW Health Pathology	NSW Health Pathology - Institute of Clinical Pathology and Medical Research; Westmead Hospital; University of Sydney	Arnott A. et al
Australia/NSW-ICPMR-22754/2022	EPI_ISL_11652031	2022-03-21	Pathology West - NSW Health Pathology	NSW Health Pathology - Institute of Clinical Pathology and Medical Research; Westmead Hospital; University of Sydney	Arnott A. et al
Australia/NSW-ICPMR-22875/2022	EPI_ISL_11652157	2022-03-22	Australian Clinical Labs (formerly Healthscope Pathology)	NSW Health Pathology - Institute of Clinical Pathology and Medical Research; Westmead Hospital; University of Sydney	Arnott A. et al
Australia/NSW-ICPMR-22927/2022	EPI_ISL_11652211	2022-03-25	Pathology West - NSW Health Pathology	NSW Health Pathology - Institute of Clinical Pathology and Medical Research; Westmead Hospital; University of Sydney	Arnott A. et al
Australia/NSW-ICPMR-22971/2022	EPI_ISL_11652258	2022-03-26	Pathology West - NSW Health Pathology	NSW Health Pathology - Institute of Clinical Pathology and Medical Research; Westmead Hospital; University of Sydney	Arnott A. et al
Australia/NSW-ICPMR-22973/2022	EPI_ISL_11652260	2022-03-27	Pathology West - NSW Health Pathology	NSW Health Pathology - Institute of Clinical Pathology and Medical Research; Westmead Hospital; University of Sydney	Arnott A. et al
Australia/NSW-ICPMR-22997/2022	EPI_ISL_11652284	2022-03-28	Pathology West - NSW Health Pathology	NSW Health Pathology - Institute of Clinical Pathology and Medical Research; Westmead Hospital; University of Sydney	Arnott A. et al
Australia/NSW-ICPMR-23016/2022	EPI_ISL_11652304	2022-03-24	4Cyte Pathology	NSW Health Pathology - Institute of Clinical Pathology and Medical Research; Westmead Hospital; University of Sydney	Arnott A. et al
Australia/NSW-ICPMR-23032/2022	EPI_ISL_11652321	2022-03-25	Histopath	NSW Health Pathology - Institute of Clinical Pathology and Medical Research; Westmead Hospital; University of Sydney	Arnott A. et al
Australia/NSW-ICPMR-23168/2022	EPI_ISL_12032697	2022-03-26	Pathology West - NSW Health Pathology	NSW Health Pathology - Institute Of Clinical Pathology And Medical Research (ICPMR), Westmead Hospital	Arnott A. et al
Australia/NSW-ICPMR-23273/2022	EPI_ISL_12032802	2022-03-28	Laverty Pathology	NSW Health Pathology - Institute Of Clinical Pathology And Medical Research (ICPMR), Westmead Hospital	Arnott A. et al
Australia/NSW-ICPMR-23304/2022	EPI_ISL_12032833	2022-04-01	Pathology West - NSW Health Pathology	NSW Health Pathology - Institute Of Clinical Pathology And Medical Research (ICPMR), Westmead Hospital	Arnott A. et al
Australia/NSW-ICPMR-23459/2022	EPI_ISL_12032988	2022-04-04	Pathology West - NSW Health Pathology	NSW Health Pathology - Institute Of Clinical Pathology And Medical Research (ICPMR), Westmead Hospital	Arnott A. et al
Australia/NSW-ICPMR-23464/2022	EPI_ISL_12032993	2022-04-04	Pathology West - NSW Health Pathology	NSW Health Pathology - Institute Of Clinical Pathology And Medical Research (ICPMR), Westmead Hospital	Arnott A. et al
Australia/NSW-ICPMR-23485/2022	EPI_ISL_12033014	2022-03-30	4Cyte Pathology	NSW Health Pathology - Institute Of Clinical Pathology And Medical Research (ICPMR), Westmead Hospital	Arnott A. et al
Australia/NSW-ICPMR-23486/2022	EPI_ISL_12033015	2022-03-31	4Cyte Pathology	NSW Health Pathology - Institute Of Clinical Pathology And Medical Research (ICPMR), Westmead Hospital	Arnott A. et al
Australia/NSW-ICPMR-23611/2022	EPI_ISL_12033140	2022-04-06	Pathology West - NSW Health Pathology	NSW Health Pathology - Institute Of Clinical Pathology And Medical Research (ICPMR), Westmead Hospital	Arnott A. et al
Australia/NSW-ICPMR-23688/2022	EPI_ISL_12033217	2022-04-07	Pathology West - NSW Health Pathology	NSW Health Pathology - Institute Of Clinical Pathology And Medical Research (ICPMR), Westmead Hospital	Arnott A. et al
Australia/NSW-ICPMR-23892/2022	EPI_ISL_12226875	2022-04-09	Pathology West - NSW Health Pathology	NSW Health Pathology - Institute of Clinical Pathology and Medical Research; Westmead Hospital; University of Sydney	Arnott A. et al
Australia/NSW-ICPMR-23990/2022	EPI_ISL_12226744	2022-04-07	Histopath	NSW Health Pathology - Institute of Clinical Pathology and Medical Research; Westmead Hospital; University of Sydney	Arnott A. et al
Australia/NSW-ICPMR-23993/2022	EPI_ISL_12226746	2022-04-07	Histopath	NSW Health Pathology - Institute of Clinical Pathology and Medical Research; Westmead Hospital; University of Sydney	Arnott A. et al
Australia/NSW-ICPMR-23995/2022	EPI_ISL_12226748	2022-04-07	Histopath	NSW Health Pathology - Institute of Clinical Pathology and Medical Research; Westmead Hospital; University of Sydney	Arnott A. et al
Australia/NSW-ICPMR-23997/2022	EPI_ISL_12226749	2022-04-08	Histopath	NSW Health Pathology - Institute of Clinical Pathology and Medical Research; Westmead Hospital; University of Sydney	Arnott A. et al
Australia/NSW-ICPMR-23998/2022	EPI_ISL_12226750	2022-04-09	Histopath	NSW Health Pathology - Institute of Clinical Pathology and Medical Research; Westmead Hospital; University of Sydney	Arnott A. et al
Australia/NSW-ICPMR-24000/2022	EPI_ISL_12226751	2022-04-09	Histopath	NSW Health Pathology - Institute of Clinical Pathology and Medical Research; Westmead Hospital; University of Sydney	Arnott A. et al
Australia/NSW-ICPMR-24001/2022	EPI_ISL_12226914	2022-04-09	Histopath	NSW Health Pathology - Institute of Clinical Pathology and Medical Research; Westmead Hospital; University of Sydney	Arnott A. et al
Australia/NSW-ICPMR-24056/2022	EPI_ISL_12226752	2022-04-11	Douglass Hanly Moir Pathology	NSW Health Pathology - Institute of Clinical Pathology and Medical Research; Westmead Hospital; University of Sydney	Arnott A. et al
Australia/NSW-ICPMR-24061/2022	EPI_ISL_12226753	2022-04-12	Douglass Hanly Moir Pathology	NSW Health Pathology - Institute of Clinical Pathology and Medical Research; Westmead Hospital; University of Sydney	Arnott A. et al
Australia/NSW-ICPMR-24129/2022	EPI_ISL_12405783	2022-04-16	Histopath	NSW Health Pathology - Institute of Clinical Pathology and Medical Research; Westmead Hospital; University of Sydney	Arnott A. et al
Australia/NSW-ICPMR-24196/2022	EPI_ISL_12405850	2022-04-13	4Cyte Pathology	NSW Health Pathology - Institute of Clinical Pathology and Medical Research; Westmead Hospital; University of Sydney	Arnott A. et al
Australia/NSW-ICPMR-24414/2022	EPI_ISL_12406068	2022-04-06	Laverty Pathology	NSW Health Pathology - Institute of Clinical Pathology and Medical Research; Westmead Hospital; University of Sydney	Arnott A. et al
Australia/NSW-ICPMR-24480/2022	EPI_ISL_12557236	2022-04-11	Pathology West - NSW Health Pathology	NSW Health Pathology - Institute of Clinical Pathology and Medical Research; Westmead Hospital; University of Sydney	Arnott A. et al
Australia/NSW-ICPMR-24552/2022	EPI_ISL_12557193	2022-04-14	Pathology West - NSW Health Pathology	NSW Health Pathology - Institute of Clinical Pathology and Medical Research; Westmead Hospital; University of Sydney	Arnott A. et al
Australia/NSW-ICPMR-24638/2022	EPI_ISL_12557591	2022-04-23	Histopath	NSW Health Pathology - Institute of Clinical Pathology and Medical Research; Westmead Hospital; University of Sydney	Arnott A. et al
Australia/NSW-ICPMR-24673/2022	EPI_ISL_12557251	2022-04-24	Pathology West - NSW Health Pathology	NSW Health Pathology - Institute of Clinical Pathology and Medical Research; Westmead Hospital; University of Sydney	Arnott A. et al
Australia/NSW-ICPMR-24875/2022	EPI_ISL_12605009	2022-04-23	Histopath	NSW Health Pathology - Institute of Clinical Pathology and Medical Research; Westmead Hospital; University of Sydney	Arnott A. et al
Australia/NSW-ICPMR-24876/2022	EPI_ISL_12605010	2022-04-24	Histopath	NSW Health Pathology - Institute of Clinical Pathology and Medical Research; Westmead Hospital; University of Sydney	Arnott A. et al
Australia/NSW-ICPMR-24989/2022	EPI_ISL_12679184	2022-03-07	Pathology West - NSW Health Pathology	NSW Health Pathology - Institute of Clinical Pathology and Medical Research; Westmead Hospital; University of Sydney	Arnott A. et al
Australia/NSW-ICPMR-24990/2022	EPI_ISL_12679185	2022-03-08	Douglass Hanly Moir Pathology	NSW Health Pathology - Institute of Clinical Pathology and Medical Research; Westmead Hospital; University of Sydney	Arnott A. et al
Australia/NSW-ICPMR-24991/2022	EPI_ISL_12679214	2022-03-09	Douglass Hanly Moir Pathology	NSW Health Pathology - Institute of Clinical Pathology and Medical Research; Westmead Hospital; University of Sydney	Arnott A. et al
Australia/NSW-ICPMR-25025/2022	EPI_ISL_12678871	2022-04-28	Histopath	NSW Health Pathology - Institute of Clinical Pathology and Medical Research; Westmead Hospital; University of Sydney	Arnott A. et al
Australia/NSW-ICPMR-25094/2022	EPI_ISL_12678872	2022-04-29	St Vincent's Pathology (SydPath)	NSW Health Pathology - Institute of Clinical Pathology and Medical Research; Westmead Hospital; University of Sydney	Arnott A. et al
Australia/NSW-ICPMR-25437/2022	EPI_ISL_12808438	2022-04-06	Douglass Hanly Moir Pathology	NSW Health Pathology - Institute of Clinical Pathology and Medical Research; Westmead Hospital; University of Sydney	Arnott A. et al
Australia/NSW-RPAH-2052/2021	EPI_ISL_7162071	2021-12-03	New South Wales Health Pathology Royal Prince Alfred Hospital	Microbiology RPAH	Foster et al
Australia/NSW-RPAH-2053/2021	EPI_ISL_7162072	2021-12-03	New South Wales Health Pathology Royal Prince Alfred Hospital	Microbiology RPAH	Foster et al
Australia/NSW-RPAH-2056/2021	EPI_ISL_7379517	2021-12-07	New South Wales Health Pathology Royal Prince Alfred Hospital	Microbiology RPAH	Foster et al
Australia/NSW-RPAH-2060/2021	EPI_ISL_7457538	2021-12-08	New South Wales Health Pathology Royal Prince Alfred Hospital	Microbiology RPAH	Foster et al
Australia/NSW-RPAH-2064/2021	EPI_ISL_7503745	2021-12-09	New South Wales Health Pathology Royal Prince Alfred Hospital	Microbiology RPAH	Foster et al
Australia/NSW-RPAH-2073/2021	EPI_ISL_7622409	2021-12-12	New South Wales Health Pathology Royal Prince Alfred Hospital	Microbiology RPAH	Foster et al
Australia/NSW-RPAH-2095/2021	EPI_ISL_7748245	2021-12-15	New South Wales Health Pathology Royal Prince Alfred Hospital	Microbiology RPAH	Foster et al
Australia/NSW-RPAH-2177/2021	EPI_ISL_8600340	2021-12-28	New South Wales Health Pathology Royal Prince Alfred Hospital	Microbiology RPAH	Foster et al
Australia/NSW-RPAH-2197/2022	EPI_ISL_8600369	2022-01-06	New South Wales Health Pathology Royal Prince Alfred Hospital	Microbiology RPAH	Foster et al
Australia/NSW-RPAH-2467/2022	EPI_ISL_9672723	2022-01-19	New South Wales Health Pathology, Royal Prince Alfred Hospital Laboratory	Microbiology, Royal Prince Alfred Hospital	Foster et al
Australia/NSW-RPAH-2479/2022	EPI_ISL_9771148	2022-01-18	New South Wales Health Pathology, Royal Prince Alfred Hospital	Microbiology, Royal Prince Alfred Hospital	Foster et al
Australia/NSW-RPAH-2587/2022	EPI_ISL_10430133	2022-02-20	New South Wales Health Pathology Royal Prince Alfred Hospital	Microbiology RPAH	Foster et al
Australia/NSW-RPAH-2621/2022	EPI_ISL_10724590	2022-02-27	New South Wales Health Pathology Royal Prince Alfred Hospital	Microbiology RPAH	Foster et al
Australia/NSW-RPAH-2630/2022	EPI_ISL_10842363	2022-03-01	New South Wales Health Pathology, Royal Prince Alfred Hospital	Microbiology, Royal Prince Alfred Hospital	Foster et al
Australia/NSW-RPAH-2727/2022	EPI_ISL_11147964	2022-03-09	New South Wales Health Pathology Royal Prince Alfred Hospital	Microbiology RPAH	Foster et al
Australia/NSW-RPAH-2748/2022	EPI_ISL_11504196	2022-03-18	New South Wales Health Pathology Royal Prince Alfred Hospital	Microbiology RPAH	Foster et al
Australia/NSW-RPAH-2861/2022	EPI_ISL_12004061	2022-04-05	New South Wales Health Pathology Royal Prince Alfred Hospital	Microbiology RPAH	Foster et al
Australia/NSW-RPAH-3009/2022	EPI_ISL_12701708	2022-05-02	New South Wales Health Pathology, Royal Prince Alfred Hospital	Microbiology, Royal Prince Alfred Hospital	Foster et al
Australia/NSW-SAVID-10351/2022	EPI_ISL_11499388	2022-02-06	Area of Virology, Serology and Virology Division (SAViD), New South Wales Health Pathology Randwick	Virology Research Laboratory; Area of Virology, Serology and Virology Division (SAViD), New South Wales Health Pathology Randwick	Foster et al
Australia/NSW-SAVID-10358/2022	EPI_ISL_10981511	2022-02-07	Area of Virology, Serology and Virology Division (SAViD), New South Wales Health Pathology Randwick, Prince of Wales Hospital,	Virology Research Laboratory; Area of Virology, Serology and Virology Division (SAViD), New South Wales Health Pathology Randwick	Foster et al
Australia/NSW-SAVID-10372/2022	EPI_ISL_10981513	2022-02-12	Area of Virology, Serology and Virology Division (SAViD), New South Wales Health Pathology Randwick, Prince of Wales Hospital,	Virology Research Laboratory; Area of Virology, Serology and Virology Division (SAViD), New South Wales Health Pathology Randwick	Foster et al
Australia/NSW-SAVID-10388/2022	EPI_ISL_10981529	2022-01-11	Area of Virology, Serology and Virology Division (SAViD), New South Wales Health Pathology Randwick, Prince of Wales Hospital,	Virology Research Laboratory; Area of Virology, Serology and Virology Division (SAViD), New South Wales Health Pathology Randwick	Foster et al
Australia/NSW-SAVID-10404/2022	EPI_ISL_10981545	2022-01-14	Area of Virology, Serology and Virology Division (SAViD), New South Wales Health Pathology Randwick	Virology Research Laboratory; Area of Virology, Serology and Virology Division (SAViD), New South Wales Health Pathology Randwick	Foster et al
Australia/NSW-SAVID-10426/2022	EPI_ISL_11499361	2022-02-15	Area of Virology, Serology and Virology Division (SAViD), New South Wales Health Pathology Randwick	Virology Research Laboratory; Area of Virology, Serology and Virology Division (SAViD), New South Wales Health Pathology Randwick	Foster et al
Australia/NSW-SAVID-10441/2022	EPI_ISL_10981553	2022-02-08	Area of Virology, Serology and Virology Division (SAViD), New South Wales Health Pathology Randwick, Prince of Wales Hospital,	Virology Research Laboratory; Area of Virology, Serology and Virology Division (SAViD), New South Wales Health Pathology Randwick	Foster et al
Australia/NSW-SAVID-10555/2022	EPI_ISL_10981599	2022-03-01	Area of Virology, Serology and Virology Division (SAViD), New South Wales Health Pathology Randwick	Virology Research Laboratory; Area of Virology, Serology and Virology Division (SAViD), New South Wales Health Pathology Randwick	Foster et al
Australia/NSW-SAVID-10592/2022	EPI_ISL_11907663	2022-02-11	Area of Virology, Serology and Virology Division (SAViD), New South Wales Health Pathology Randwick	Virology Research Laboratory; Area of Virology, Serology and Virology Division (SAViD), New South Wales Health Pathology Randwick	Foster et al
Australia/NSW-SAVID-10683/2022	EPI_ISL_12546571	2022-03-09	Area of Virology, Serology and Virology Division (SAViD), New South Wales Health Pathology Randwick	Virology Research Laboratory; Area of Virology, Serology and Virology Division (SAViD), New South Wales Health Pathology Randwick	Foster et al
Australia/NSW-SAVID-10698/2022	EPI_ISL_11765537	2022-03-11	Area of Virology, Serology and Virology Division (SAViD), New South Wales Health Pathology Randwick, Prince of Wales Hospital	Virology Research Laboratory; Area of Virology, Serology and Virology Division (SAViD), New South Wales Health Pathology Randwick, Prince of Wales Hospital	Foster et al
Australia/NSW-SAVID-10706/2022	EPI_ISL_11765553	2022-03-18	Area of Virology, Serology and Virology Division (SAViD), New South Wales Health Pathology Randwick, Prince of Wales Hospital	Virology Research Laboratory; Area of Virology, Serology and Virology Division (SAViD), New South Wales Health Pathology Randwick, Prince of Wales Hospital	Foster et al
Australia/NSW-SAVID-10715/2022	EPI_ISL_11765478	2022-03-17	Area of Virology, Serology and Virology Division (SAViD), New South Wales Health Pathology Randwick, Prince of Wales Hospital	Virology Research Laboratory; Area of Virology, Serology and Virology Division (SAViD), New South Wales Health Pathology Randwick, Prince of Wales Hospital	Foster et al
Australia/NSW-SAVID-10722/2022	EPI_ISL_11765488	2022-03-13	Area of Virology, Serology and Virology Division (SAViD), New South Wales Health Pathology Randwick, Prince of Wales Hospital	Virology Research Laboratory; Area of Virology, Serology and Virology Division (SAViD), New South Wales Health Pathology Randwick, Prince of Wales Hospital	Foster et al
Australia/NSW-SAVID-10726/2022	EPI_ISL_11765490	2022-03-18	Area of Virology, Serology and Virology Division (SAViD), New South Wales Health Pathology Randwick, Prince of Wales Hospital	Virology Research Laboratory; Area of Virology, Serology and Virology Division (SAViD), New South Wales Health Pathology Randwick, Prince of Wales Hospital	Foster et al
Australia/NSW-SAVID-10751/2022	EPI_ISL_11765491	2022-03-10	Area of Virology, Serology and Virology Division (SAViD), New South Wales Health Pathology Randwick, Prince of Wales Hospital	Virology Research Laboratory; Area of Virology, Serology and Virology Division (SAViD), New South Wales Health Pathology Randwick, Prince of Wales Hospital	Foster et al
Australia/NSW-SAVID-10768/2022	EPI_ISL_11765498	2022-03-13	Area of Virology, Serology and Virology Division (SAViD), New South Wales Health Pathology Randwick, Prince of Wales Hospital	Virology Research Laboratory; Area of Virology, Serology and Virology Division (SAViD), New South Wales Health Pathology Randwick, Prince of Wales Hospital	Foster et al
Australia/NSW-SAVID-10778/2022	EPI_ISL_11765499	2022-03-16	Area of Virology, Serology and Virology Division (SAViD), New South Wales Health Pathology Randwick, Prince of Wales Hospital	Virology Research Laboratory; Area of Virology, Serology and Virology Division (SAViD), New South Wales Health Pathology Randwick, Prince of Wales Hospital	Foster et al
Australia/NSW-SAVID-10790/2022	EPI_ISL_11765530	2022-03-11	Area of Virology, Serology and Virology Division (SAViD), New South Wales Health Pathology Randwick, Prince of Wales Hospital	Virology Research Laboratory; Area of Virology, Serology and Virology Division (SAViD), New South Wales Health Pathology Randwick, Prince of Wales Hospital	Foster et al
Australia/NSW-SAVID-10891/2022	EPI_ISL_12206209	2022-01-05	Area of Virology, Serology and Virology Division (SAViD), New South Wales Health Pathology Randwick	Virology Research Laboratory; Area of Virology, Serology and Virology Division (SAViD), New South Wales Health Pathology Randwick	Foster et al
Australia/NSW-SAVID-10908/2022	EPI_ISL_12206207	2022-01-05	Area of Virology, Serology and Virology Division (SAViD), New South Wales Health Pathology Randwick	Virology Research Laboratory; Area of Virology, Serology and Virology Division (SAViD), New South Wales Health Pathology Randwick	Foster et al
Australia/NSW-SAVID-10911/2022	EPI_ISL_12206149	2022-01-06	Area of Virology, Serology and Virology Division (SAViD), New South Wales Health Pathology Randwick	Virology Research Laboratory; Area of Virology, Serology and Virology Division (SAViD), New South Wales Health Pathology Randwick	Foster et al
Australia/NSW-SAVID-10918/2022	EPI_ISL_12206206	2022-01-07	Area of Virology, Serology and Virology Division (SAViD), New South Wales Health Pathology Randwick	Virology Research Laboratory; Area of Virology, Serology and Virology Division (SAViD), New South Wales Health Pathology Randwick	Foster et al
Australia/NSW-SAVID-10937/2022	EPI_ISL_12206145	2022-01-05	Area of Virology, Serology and Virology Division (SAViD), New South Wales Health Pathology Randwick	Virology Research Laboratory; Area of Virology, Serology and Virology Division (SAViD), New South Wales Health Pathology Randwick	Foster et al
Australia/NSW-SAVID-10960/2022	EPI_ISL_12206175	2022-03-27	Area of Virology, Serology and Virology Division (SAViD), New South Wales Health Pathology Randwick	Virology Research Laboratory; Area of Virology, Serology and Virology Division (SAViD), New South Wales Health Pathology Randwick	Foster et al
Australia/NSW-SAVID-10977/2022	EPI_ISL_12206154	2022-03-27	Area of Virology, Serology and Virology Division (SAViD), New South Wales Health Pathology Randwick	Virology Research Laboratory; Area of Virology, Serology and Virology Division (SAViD), New South Wales Health Pathology Randwick	Foster et al
Australia/NSW-SAVID-10994/2022	EPI_ISL_11799663	2022-03-24	Area of Virology, Serology and Virology Division (SAViD), New South Wales Health Pathology Randwick, Prince of Wales Hospital	Virology Research Laboratory; Area of Virology, Serology and Virology Division (SAViD), New South Wales Health Pathology Randwick, Prince of Wales Hospital	Foster et al
Australia/NSW-SAVID-11038/2022	EPI_ISL_11799707	2022-03-21	Area of Virology, Serology and Virology Division (SAViD), New South Wales Health Pathology Randwick, Prince of Wales Hospital	Virology Research Laboratory; Area of Virology, Serology and Virology Division (SAViD), New South Wales Health Pathology Randwick, Prince of Wales Hospital	Foster et al
Australia/NSW-SAVID-11162/2022	EPI_ISL_11866586	2022-01-11	Area of Virology, Serology and Virology Division (SAViD), New South Wales Health Pathology Randwick, Prince of Wales Hospital	Virology Research Laboratory; Area of Virology, Serology and Virology Division (SAViD), New South Wales Health Pathology Randwick, Prince of Wales Hospital	Foster et al
Australia/NSW-SAVID-11233/2022	EPI_ISL_12206051	2022-04-08	Area of Virology, Serology and Virology Division (SAViD), New South Wales Health Pathology Randwick	Virology Research Laboratory; Area of Virology, Serology and Virology Division (SAViD), New South Wales Health Pathology Randwick	Foster et al
Australia/NSW-SAVID-11240/2022	EPI_ISL_12206058	2022-04-07	Area of Virology, Serology and Virology Division (SAViD), New South Wales Health Pathology Randwick, Prince of Wales Hospital	Virology Research Laboratory; Area of Virology, Serology and Virology Division (SAViD), New South Wales Health Pathology Randwick, Prince of Wales Hospital	Foster et al
Australia/NSW-SAVID-11242/2022	EPI_ISL_12206060	2022-04-06	Area of Virology, Serology and Virology Division (SAViD), New South Wales Health Pathology Randwick	Virology Research Laboratory; Area of Virology, Serology and Virology Division (SAViD), New South Wales Health Pathology Randwick	Foster et al
Australia/NSW-SAVID-11584/2022	EPI_ISL_12546555	2022-03-06	Area of Virology, Serology and Virology Division (SAViD), New South Wales Health Pathology Randwick	Virology Research Laboratory; Area of Virology, Serology and Virology Division (SAViD), New South Wales Health Pathology Randwick	Foster et al
Australia/NSW-SAVID-11647/2022	EPI_ISL_12666445	2022-04-11	Area of Virology, Serology and Virology Division (SAViD), New South Wales Health Pathology Randwick	Virology Research Laboratory; Area of Virology, Serology and Virology Division (SAViD), New South Wales Health Pathology Randwick	Foster et al
Australia/NSW-SAVID-11887/2022	EPI_ISL_12666587	2022-03-26	Area of Virology, Serology and Virology Division (SAViD), New South Wales Health Pathology Randwick	Virology Research Laboratory; Area of Virology, Serology and Virology Division (SAViD), New South Wales Health Pathology Randwick	Foster et al
Australia/NSW-SAVID-7158/2021	EPI_ISL_7011321	2021-12-01	Area of Virology, Serology and Virology Division (SAViD), New South Wales Health Pathology Randwick	Virology Research Laboratory; Area of Virology, Serology and Virology Division (SAViD), New South Wales Health Pathology Randwick	Foster et al
Australia/NSW-SAVID-7900/2021	EPI_ISL_9003910	2021-12-22	Area of Virology, Serology and Virology Division (SAViD), New South Wales Health Pathology Randwick	Virology Research Laboratory; Area of Virology, Serology and Virology Division (SAViD), New South Wales Health Pathology Randwick	Foster et al
Australia/NSW-SAVID-9357/2022	EPI_ISL_9769689	2022-01-10	Area of Virology, Serology and Virology Division (SAViD), New South Wales Health Pathology Randwick	Virology Research Laboratory; Area of Virology, Serology and Virology Division (SAViD), New South Wales Health Pathology Randwick	Foster et al
Australia/NSW-SAVID-9359/2022	EPI_ISL_9769710	2022-01-06	Area of Virology, Serology and Virology Division (SAViD), New South Wales Health Pathology Randwick	Virology Research Laboratory; Area of Virology, Serology and Virology Division (SAViD), New South Wales Health Pathology Randwick	Foster et al
Australia/NSW-SAVID-9561/2022	EPI_ISL_9769806	2022-01-28	Area of Virology, Serology and Virology Division (SAViD), New South Wales Health Pathology Randwick	Virology Research Laboratory; Area of Virology, Serology and Virology Division (SAViD), New South Wales Health Pathology Randwick	Foster et al
Australia/NT-RDH-57/2021	EPI_ISL_10093182	2021-11-26	Territory Pathology	Territory Pathology	Dimitrios Menouhos et al
Australia/QLD0x00C3AC/2022	EPI_ISL_10261517	2022-01-18	Pathology Queensland and Forensic Scientific Services	PHV-FSS	Chenwei Wang on behalf of Q-PHIRE Genomics et al
Australia/QLD0x00C415/2022	EPI_ISL_10263022	2022-02-02	Pathology Queensland and Forensic Scientific Services	PHV-FSS	Chenwei Wang on behalf of Q-PHIRE Genomics et al
Australia/QLD0x00C416/2022	EPI_ISL_10263018	2022-02-01	Pathology Queensland and Forensic Scientific Services	PHV-FSS	Chenwei Wang on behalf of Q-PHIRE Genomics et al
Australia/QLD0x00C418/2022	EPI_ISL_10263020	2022-01-30	Pathology Queensland and Forensic Scientific Services	PHV-FSS	Chenwei Wang on behalf of Q-PHIRE Genomics et al
Australia/QLD0x00C419/2022	EPI_ISL_10263015	2022-01-31	Pathology Queensland and Forensic Scientific Services	PHV-FSS	Chenwei Wang on behalf of Q-PHIRE Genomics et al
Australia/QLD0x00C41A/2022	EPI_ISL_10263013	2022-02-01	Pathology Queensland and Forensic Scientific Services	PHV-FSS	Chenwei Wang on behalf of Q-PHIRE Genomics et al
Australia/QLD0x00C41B/2022	EPI_ISL_10263021	2022-02-02	Pathology Queensland and Forensic Scientific Services	PHV-FSS	Chenwei Wang on behalf of Q-PHIRE Genomics et al
Australia/QLD0x00C41C/2022	EPI_ISL_10263016	2022-01-31	Pathology Queensland and Forensic Scientific Services	PHV-FSS	Chenwei Wang on behalf of Q-PHIRE Genomics et al
Australia/QLD0x00C41E/2022	EPI_ISL_10261837	2022-02-01	Pathology Queensland and Forensic Scientific Services	PHV-FSS	Chenwei Wang on behalf of Q-PHIRE Genomics et al
Australia/QLD0x00C433/2022	EPI_ISL_10263667	2022-01-04	Pathology Queensland and Forensic Scientific Services	PHV-FSS	Chenwei Wang on behalf of Q-PHIRE Genomics et al
Australia/QLD0x00C484/2022	EPI_ISL_10261626	2022-01-24	Sullivan Nicolaides Pathology	PHV-FSS	Chenwei Wang on behalf of Q-PHIRE Genomics et al
Australia/QLD0x00C48B/2022	EPI_ISL_10263701	2022-01-20	Sullivan Nicolaides Pathology	PHV-FSS	Chenwei Wang on behalf of Q-PHIRE Genomics et al
Australia/QLD0x00C495/2022	EPI_ISL_10262258	2022-01-20	Sullivan Nicolaides Pathology	PHV-FSS	Chenwei Wang on behalf of Q-PHIRE Genomics et al
Australia/QLD0x00C592/2022	EPI_ISL_10305530	2022-01-28	PHV-FSS	PHV-FSS	Chenwei Wang on behalf of Q-PHIRE Genomics et al
Australia/QLD0x00C5AE/2022	EPI_ISL_10305601	2022-01-04	PHV-FSS	PHV-FSS	Chenwei Wang on behalf of Q-PHIRE Genomics et al
Australia/QLD0x00C5B0/2022	EPI_ISL_10305737	2022-01-03	PHV-FSS	PHV-FSS	Chenwei Wang on behalf of Q-PHIRE Genomics et al
Australia/QLD0x00C5C8/2022	EPI_ISL_10305628	2022-01-04	PHV-FSS	PHV-FSS	Chenwei Wang on behalf of Q-PHIRE Genomics et al
Australia/QLD0x00C5D7/2022	EPI_ISL_10305521	2022-01-04	PHV-FSS	PHV-FSS	Chenwei Wang on behalf of Q-PHIRE Genomics et al
Australia/QLD0x00C5E7/2022	EPI_ISL_10305658	2022-01-09	PHV-FSS	PHV-FSS	Chenwei Wang on behalf of Q-PHIRE Genomics et al
Australia/QLD0x00C5F1/2022	EPI_ISL_10305668	2022-01-09	PHV-FSS	PHV-FSS	Chenwei Wang on behalf of Q-PHIRE Genomics et al
Australia/QLD0x00C5F6/2022	EPI_ISL_10305672	2022-01-04	PHV-FSS	PHV-FSS	Chenwei Wang on behalf of Q-PHIRE Genomics et al
Australia/QLD0x00C667/2022	EPI_ISL_10305349	2022-02-01	Pathology Queensland and Forensic Scientific Services	PHV-FSS	Chenwei Wang on behalf of Q-PHIRE Genomics et al
Australia/QLD0x00C689/2022	EPI_ISL_10305430	2022-01-28	PHV-FSS	PHV-FSS	Chenwei Wang on behalf of Q-PHIRE Genomics et al
Australia/QLD0x00C6B9/2022	EPI_ISL_10305695	2022-01-18	Pathology Queensland and Forensic Scientific Services	PHV-FSS	Chenwei Wang on behalf of Q-PHIRE Genomics et al
Australia/QLD0x00C71B/2022	EPI_ISL_10305519	2022-01-28	Queensland Medical Laboratories	PHV-FSS	Chenwei Wang on behalf of Q-PHIRE Genomics et al
Australia/QLD0x00C757/2022	EPI_ISL_10974646	2022-01-30	Pathology Queensland and Forensic Scientific Services	PHV-FSS	Chenwei Wang on behalf of Q-PHIRE Genomics et al
Australia/QLD0x00C79C/2022	EPI_ISL_10974655	2022-02-03	Pathology Queensland and Forensic Scientific Services	PHV-FSS	Chenwei Wang on behalf of Q-PHIRE Genomics et al
Australia/QLD0x00C7F6/2022	EPI_ISL_10973896	2022-01-29	Sullivan Nicolaides Pathology	PHV-FSS	Chenwei Wang on behalf of Q-PHIRE Genomics et al
Australia/QLD0x00C802/2022	EPI_ISL_10973700	2022-01-21	Sullivan Nicolaides Pathology	PHV-FSS	Chenwei Wang on behalf of Q-PHIRE Genomics et al
Australia/QLD0x00C82E/2022	EPI_ISL_10974543	2022-01-31	Pathology Queensland and Forensic Scientific Services	PHV-FSS	Chenwei Wang on behalf of Q-PHIRE Genomics et al
Australia/QLD0x00C852/2022	EPI_ISL_10973519	2022-01-05	Pathology Queensland and Forensic Scientific Services	PHV-FSS	Chenwei Wang on behalf of Q-PHIRE Genomics et al
Australia/QLD0x00C891/2022	EPI_ISL_10973620	2022-02-03	Pathology Queensland and Forensic Scientific Services	PHV-FSS	Chenwei Wang on behalf of Q-PHIRE Genomics et al
Australia/QLD0x00C8B2/2022	EPI_ISL_10975826	2022-02-04	Pathology Queensland and Forensic Scientific Services	PHV-FSS	Chenwei Wang on behalf of Q-PHIRE Genomics et al
Australia/QLD0x00C8B6/2022	EPI_ISL_10973627	2022-02-03	Pathology Queensland and Forensic Scientific Services	PHV-FSS	Chenwei Wang on behalf of Q-PHIRE Genomics et al
Australia/QLD0x00C8C6/2022	EPI_ISL_10975594	2022-02-03	Pathology Queensland and Forensic Scientific Services	PHV-FSS	Chenwei Wang on behalf of Q-PHIRE Genomics et al
Australia/QLD0x00C8D9/2022	EPI_ISL_10974733	2022-02-03	Pathology Queensland and Forensic Scientific Services	PHV-FSS	Chenwei Wang on behalf of Q-PHIRE Genomics et al
Australia/QLD0x00C8EC/2022	EPI_ISL_10973645	2022-02-06	Pathology Queensland and Forensic Scientific Services	PHV-FSS	Chenwei Wang on behalf of Q-PHIRE Genomics et al
Australia/QLD0x00C8EE/2022	EPI_ISL_10974869	2022-01-31	Pathology Queensland and Forensic Scientific Services	PHV-FSS	Chenwei Wang on behalf of Q-PHIRE Genomics et al
Australia/QLD0x00C933/2022	EPI_ISL_10974238	2022-02-04	Pathology Queensland and Forensic Scientific Services	PHV-FSS	Chenwei Wang on behalf of Q-PHIRE Genomics et al
Australia/QLD0x00C936/2022	EPI_ISL_10975221	2022-02-15	Pathology Queensland and Forensic Scientific Services	PHV-FSS	Chenwei Wang on behalf of Q-PHIRE Genomics et al
Australia/QLD0x00C93A/2022	EPI_ISL_10975756	2022-02-06	Pathology Queensland and Forensic Scientific Services	PHV-FSS	Chenwei Wang on behalf of Q-PHIRE Genomics et al
Australia/QLD0x00C94A/2022	EPI_ISL_10974713	2022-02-06	Pathology Queensland and Forensic Scientific Services	PHV-FSS	Chenwei Wang on behalf of Q-PHIRE Genomics et al
Australia/QLD0x00C97E/2022	EPI_ISL_10974435	2022-02-18	Pathology Queensland and Forensic Scientific Services	PHV-FSS	Chenwei Wang on behalf of Q-PHIRE Genomics et al
Australia/QLD0x00C984/2022	EPI_ISL_10974895	2022-02-05	Pathology Queensland and Forensic Scientific Services	PHV-FSS	Chenwei Wang on behalf of Q-PHIRE Genomics et al
Australia/QLD0x00C990/2022	EPI_ISL_10975490	2022-02-05	Pathology Queensland and Forensic Scientific Services	PHV-FSS	Chenwei Wang on behalf of Q-PHIRE Genomics et al
Australia/QLD0x00C9A9/2022	EPI_ISL_10973852	2022-02-06	Pathology Queensland and Forensic Scientific Services	PHV-FSS	Chenwei Wang on behalf of Q-PHIRE Genomics et al
Australia/QLD0x00C9B7/2022	EPI_ISL_10973977	2022-02-07	Pathology Queensland and Forensic Scientific Services	PHV-FSS	Chenwei Wang on behalf of Q-PHIRE Genomics et al
Australia/QLD0x00C9DB/2022	EPI_ISL_10975522	2022-02-07	Pathology Queensland and Forensic Scientific Services	PHV-FSS	Chenwei Wang on behalf of Q-PHIRE Genomics et al
Australia/QLD0x00C9E6/2022	EPI_ISL_10974945	2022-02-07	Pathology Queensland and Forensic Scientific Services	PHV-FSS	Chenwei Wang on behalf of Q-PHIRE Genomics et al
Australia/QLD0x00C9EC/2022	EPI_ISL_10973904	2022-02-02	Pathology Queensland and Forensic Scientific Services	PHV-FSS	Chenwei Wang on behalf of Q-PHIRE Genomics et al
Australia/QLD0x00CA55/2022	EPI_ISL_10974944	2022-02-07	Pathology Queensland and Forensic Scientific Services	PHV-FSS	Chenwei Wang on behalf of Q-PHIRE Genomics et al
Australia/QLD0x00CA5A/2022	EPI_ISL_10974741	2022-02-05	Pathology Queensland and Forensic Scientific Services	PHV-FSS	Chenwei Wang on behalf of Q-PHIRE Genomics et al
Australia/QLD0x00CA5D/2022	EPI_ISL_10975345	2022-02-06	Pathology Queensland and Forensic Scientific Services	PHV-FSS	Chenwei Wang on behalf of Q-PHIRE Genomics et al
Australia/QLD0x00CAB1/2022	EPI_ISL_10974775	2022-02-07	Pathology Queensland and Forensic Scientific Services	PHV-FSS	Chenwei Wang on behalf of Q-PHIRE Genomics et al
Australia/QLD0x00CB22/2022	EPI_ISL_10975776	2022-02-09	Pathology Queensland and Forensic Scientific Services	PHV-FSS	Chenwei Wang on behalf of Q-PHIRE Genomics et al
Australia/QLD0x00CB35/2022	EPI_ISL_10973984	2022-02-10	Pathology Queensland and Forensic Scientific Services	PHV-FSS	Chenwei Wang on behalf of Q-PHIRE Genomics et al
Australia/QLD0x00CB3F/2022	EPI_ISL_10973659	2022-02-09	Pathology Queensland and Forensic Scientific Services	PHV-FSS	Chenwei Wang on behalf of Q-PHIRE Genomics et al
Australia/QLD0x00CBE9/2022	EPI_ISL_10973921	2022-02-08	Pathology Queensland and Forensic Scientific Services	PHV-FSS	Chenwei Wang on behalf of Q-PHIRE Genomics et al
Australia/QLD0x00CBEF/2022	EPI_ISL_10975177	2022-02-06	Pathology Queensland and Forensic Scientific Services	PHV-FSS	Chenwei Wang on behalf of Q-PHIRE Genomics et al
Australia/QLD0x00CBFF/2022	EPI_ISL_10974670	2022-02-07	Pathology Queensland and Forensic Scientific Services	PHV-FSS	Chenwei Wang on behalf of Q-PHIRE Genomics et al
Australia/QLD0x00CC02/2022	EPI_ISL_10975372	2022-02-08	Pathology Queensland and Forensic Scientific Services	PHV-FSS	Chenwei Wang on behalf of Q-PHIRE Genomics et al
Australia/QLD0x00CC1F/2022	EPI_ISL_10974980	2022-02-08	Pathology Queensland and Forensic Scientific Services	PHV-FSS	Chenwei Wang on behalf of Q-PHIRE Genomics et al
Australia/QLD0x00CC94/2022	EPI_ISL_10975057	2022-02-10	Pathology Queensland and Forensic Scientific Services	PHV-FSS	Chenwei Wang on behalf of Q-PHIRE Genomics et al
Australia/QLD0x00CC9E/2022	EPI_ISL_10974810	2022-02-09	Pathology Queensland and Forensic Scientific Services	PHV-FSS	Chenwei Wang on behalf of Q-PHIRE Genomics et al
Australia/QLD0x00CCB5/2022	EPI_ISL_10975059	2022-02-10	Pathology Queensland and Forensic Scientific Services	PHV-FSS	Chenwei Wang on behalf of Q-PHIRE Genomics et al
Australia/QLD0x00CCC6/2022	EPI_ISL_10975043	2022-02-09	Pathology Queensland and Forensic Scientific Services	PHV-FSS	Chenwei Wang on behalf of Q-PHIRE Genomics et al
Australia/QLD0x00CD22/2022	EPI_ISL_10973490	2022-02-11	Pathology Queensland and Forensic Scientific Services	PHV-FSS	Chenwei Wang on behalf of Q-PHIRE Genomics et al
Australia/QLD0x00CD33/2022	EPI_ISL_10973672	2022-02-10	Pathology Queensland and Forensic Scientific Services	PHV-FSS	Chenwei Wang on behalf of Q-PHIRE Genomics et al
Australia/QLD0x00CD6D/2022	EPI_ISL_10975152	2022-02-09	Pathology Queensland and Forensic Scientific Services	PHV-FSS	Chenwei Wang on behalf of Q-PHIRE Genomics et al
Australia/QLD0x00CD6E/2022	EPI_ISL_10975696	2022-02-11	Pathology Queensland and Forensic Scientific Services	PHV-FSS	Chenwei Wang on behalf of Q-PHIRE Genomics et al
Australia/QLD0x00CD7E/2022	EPI_ISL_10975335	2022-02-11	Pathology Queensland and Forensic Scientific Services	PHV-FSS	Chenwei Wang on behalf of Q-PHIRE Genomics et al
Australia/QLD0x00CD86/2022	EPI_ISL_10974317	2022-02-11	Pathology Queensland and Forensic Scientific Services	PHV-FSS	Chenwei Wang on behalf of Q-PHIRE Genomics et al
Australia/QLD0x00CD8A/2022	EPI_ISL_10975437	2022-02-09	Pathology Queensland and Forensic Scientific Services	PHV-FSS	Chenwei Wang on behalf of Q-PHIRE Genomics et al
Australia/QLD0x00CD92/2022	EPI_ISL_10974025	2022-02-10	Pathology Queensland and Forensic Scientific Services	PHV-FSS	Chenwei Wang on behalf of Q-PHIRE Genomics et al
Australia/QLD0x00CD9F/2022	EPI_ISL_10974249	2022-02-07	Pathology Queensland and Forensic Scientific Services	PHV-FSS	Chenwei Wang on behalf of Q-PHIRE Genomics et al
Australia/QLD0x00CDA1/2022	EPI_ISL_10974330	2022-02-13	Pathology Queensland and Forensic Scientific Services	PHV-FSS	Chenwei Wang on behalf of Q-PHIRE Genomics et al
Australia/QLD0x00CE7A/2022	EPI_ISL_10974495	2022-03-01	Pathology Queensland and Forensic Scientific Services	PHV-FSS	Chenwei Wang on behalf of Q-PHIRE Genomics et al
Australia/QLD0x00CEB9/2022	EPI_ISL_10973682	2022-02-10	Pathology Queensland and Forensic Scientific Services	PHV-FSS	Chenwei Wang on behalf of Q-PHIRE Genomics et al
Australia/QLD0x00CEDE/2022	EPI_ISL_10974377	2022-02-14	Pathology Queensland and Forensic Scientific Services	PHV-FSS	Chenwei Wang on behalf of Q-PHIRE Genomics et al
Australia/QLD0x00CF31/2022	EPI_ISL_10975839	2022-02-14	Pathology Queensland and Forensic Scientific Services	PHV-FSS	Chenwei Wang on behalf of Q-PHIRE Genomics et al
Australia/QLD0x00CFFE/2022	EPI_ISL_10974422	2022-02-17	Pathology Queensland and Forensic Scientific Services	PHV-FSS	Chenwei Wang on behalf of Q-PHIRE Genomics et al
Australia/QLD0x00D014/2022	EPI_ISL_10974463	2022-02-22	Pathology Queensland and Forensic Scientific Services	PHV-FSS	Chenwei Wang on behalf of Q-PHIRE Genomics et al
Australia/QLD0x00D016/2022	EPI_ISL_10974458	2022-02-21	Pathology Queensland and Forensic Scientific Services	PHV-FSS	Chenwei Wang on behalf of Q-PHIRE Genomics et al
Australia/QLD0x00D01D/2022	EPI_ISL_10974467	2022-02-23	Pathology Queensland and Forensic Scientific Services	PHV-FSS	Chenwei Wang on behalf of Q-PHIRE Genomics et al
Australia/QLD0x00D021/2022	EPI_ISL_10975794	2022-02-22	Pathology Queensland and Forensic Scientific Services	PHV-FSS	Chenwei Wang on behalf of Q-PHIRE Genomics et al
Australia/QLD0x00D022/2022	EPI_ISL_10974512	2022-02-21	Pathology Queensland and Forensic Scientific Services	PHV-FSS	Chenwei Wang on behalf of Q-PHIRE Genomics et al
Australia/QLD0x00D024/2022	EPI_ISL_10974460	2022-02-21	Pathology Queensland and Forensic Scientific Services	PHV-FSS	Chenwei Wang on behalf of Q-PHIRE Genomics et al
Australia/QLD0x00D02F/2022	EPI_ISL_10974203	2022-02-25	Pathology Queensland and Forensic Scientific Services	PHV-FSS	Chenwei Wang on behalf of Q-PHIRE Genomics et al
Australia/QLD0x00D03B/2022	EPI_ISL_10974492	2022-02-25	Pathology Queensland and Forensic Scientific Services	PHV-FSS	Chenwei Wang on behalf of Q-PHIRE Genomics et al
Australia/QLD0x00D04D/2022	EPI_ISL_10975800	2022-02-25	Pathology Queensland and Forensic Scientific Services	PHV-FSS	Chenwei Wang on behalf of Q-PHIRE Genomics et al
Australia/QLD0x00D051/2022	EPI_ISL_10975625	2022-02-15	Pathology Queensland and Forensic Scientific Services	PHV-FSS	Chenwei Wang on behalf of Q-PHIRE Genomics et al
Australia/QLD0x00D057/2022	EPI_ISL_10974488	2022-02-25	Pathology Queensland and Forensic Scientific Services	PHV-FSS	Chenwei Wang on behalf of Q-PHIRE Genomics et al
Australia/QLD0x00D06F/2022	EPI_ISL_10975408	2022-02-19	Pathology Queensland and Forensic Scientific Services	PHV-FSS	Chenwei Wang on behalf of Q-PHIRE Genomics et al
Australia/QLD0x00D087/2022	EPI_ISL_10975813	2022-02-24	Pathology Queensland and Forensic Scientific Services	PHV-FSS	Chenwei Wang on behalf of Q-PHIRE Genomics et al
Australia/QLD0x00D08E/2022	EPI_ISL_10975572	2022-02-24	Pathology Queensland and Forensic Scientific Services	PHV-FSS	Chenwei Wang on behalf of Q-PHIRE Genomics et al
Australia/QLD0x00D0B0/2022	EPI_ISL_10975548	2022-02-18	Pathology Queensland and Forensic Scientific Services	PHV-FSS	Chenwei Wang on behalf of Q-PHIRE Genomics et al
Australia/QLD0x00D0B2/2022	EPI_ISL_10973945	2022-02-19	Pathology Queensland and Forensic Scientific Services	PHV-FSS	Chenwei Wang on behalf of Q-PHIRE Genomics et al
Australia/QLD0x00D0B9/2022	EPI_ISL_10973499	2022-02-19	Pathology Queensland and Forensic Scientific Services	PHV-FSS	Chenwei Wang on behalf of Q-PHIRE Genomics et al
Australia/QLD0x00D0C7/2022	EPI_ISL_10974835	2022-02-19	Pathology Queensland and Forensic Scientific Services	PHV-FSS	Chenwei Wang on behalf of Q-PHIRE Genomics et al
Australia/QLD0x00D0CB/2022	EPI_ISL_10973963	2022-02-07	Mater Pathology	PHV-FSS	Chenwei Wang on behalf of Q-PHIRE Genomics et al
Australia/QLD0x00D0CF/2022	EPI_ISL_10975798	2022-02-21	Pathology Queensland and Forensic Scientific Services	PHV-FSS	Chenwei Wang on behalf of Q-PHIRE Genomics et al
Australia/QLD0x00D0D6/2022	EPI_ISL_10975326	2022-02-07	Mater Pathology	PHV-FSS	Chenwei Wang on behalf of Q-PHIRE Genomics et al
Australia/QLD0x00D0DC/2022	EPI_ISL_10975829	2022-02-19	Pathology Queensland and Forensic Scientific Services	PHV-FSS	Chenwei Wang on behalf of Q-PHIRE Genomics et al
Australia/QLD0x00D0EA/2022	EPI_ISL_10975378	2022-02-20	Pathology Queensland and Forensic Scientific Services	PHV-FSS	Chenwei Wang on behalf of Q-PHIRE Genomics et al
Australia/QLD0x00D14C/2022	EPI_ISL_10973993	2022-02-17	Pathology Queensland and Forensic Scientific Services	PHV-FSS	Chenwei Wang on behalf of Q-PHIRE Genomics et al
Australia/QLD0x00D160/2022	EPI_ISL_11157231	2022-03-10	Pathology Queensland and Forensic Scientific Services	PHV-FSS	Chenwei Wang on behalf of Q-PHIRE Genomics et al
Australia/QLD0x00D161/2022	EPI_ISL_11157232	2022-03-11	Pathology Queensland and Forensic Scientific Services	PHV-FSS	Chenwei Wang on behalf of Q-PHIRE Genomics et al
Australia/QLD0x00D16F/2022	EPI_ISL_11157184	2022-02-21	Pathology Queensland and Forensic Scientific Services	PHV-FSS	Chenwei Wang on behalf of Q-PHIRE Genomics et al
Australia/QLD0x00D173/2022	EPI_ISL_11157190	2022-02-23	Pathology Queensland and Forensic Scientific Services	PHV-FSS	Chenwei Wang on behalf of Q-PHIRE Genomics et al
Australia/QLD0x00D17F/2022	EPI_ISL_11157213	2022-02-24	Pathology Queensland and Forensic Scientific Services	PHV-FSS	Chenwei Wang on behalf of Q-PHIRE Genomics et al
Australia/QLD0x00D183/2022	EPI_ISL_11157225	2022-02-17	Pathology Queensland and Forensic Scientific Services	PHV-FSS	Chenwei Wang on behalf of Q-PHIRE Genomics et al
Australia/QLD0x00D197/2022	EPI_ISL_11157209	2022-02-17	Pathology Queensland and Forensic Scientific Services	PHV-FSS	Chenwei Wang on behalf of Q-PHIRE Genomics et al
Australia/QLD0x00D219/2022	EPI_ISL_11332379	2022-02-24	Pathology Queensland and Forensic Scientific Services	Public Health Virology - Forensic and Scientific Services	Chenwei Wang on behalf of Q-PHIRE Genomics et al
Australia/QLD0x00D21E/2022	EPI_ISL_11332329	2022-02-24	Pathology Queensland and Forensic Scientific Services	Public Health Virology - Forensic and Scientific Services	Chenwei Wang on behalf of Q-PHIRE Genomics et al
Australia/QLD0x00D2A4/2022	EPI_ISL_11332185	2022-02-28	Pathology Queensland and Forensic Scientific Services	Public Health Virology - Forensic and Scientific Services	Chenwei Wang on behalf of Q-PHIRE Genomics et al
Australia/QLD0x00D2B2/2022	EPI_ISL_11332215	2022-03-02	Pathology Queensland and Forensic Scientific Services	Public Health Virology - Forensic and Scientific Services	Chenwei Wang on behalf of Q-PHIRE Genomics et al
Australia/QLD0x00D2EF/2022	EPI_ISL_11332114	2022-03-04	Pathology Queensland and Forensic Scientific Services	Public Health Virology - Forensic and Scientific Services	Chenwei Wang on behalf of Q-PHIRE Genomics et al
Australia/QLD0x00D3B5/2022	EPI_ISL_11332178	2022-03-03	Sullivan Nicolaides Pathology	Public Health Virology - Forensic and Scientific Services	Chenwei Wang on behalf of Q-PHIRE Genomics et al
Australia/QLD0x00D3D4/2022	EPI_ISL_11332242	2022-03-02	Sullivan Nicolaides Pathology	Public Health Virology - Forensic and Scientific Services	Chenwei Wang on behalf of Q-PHIRE Genomics et al
Australia/QLD0x00D3E8/2022	EPI_ISL_11332044	2022-03-02	Sullivan Nicolaides Pathology	Public Health Virology - Forensic and Scientific Services	Chenwei Wang on behalf of Q-PHIRE Genomics et al
Australia/QLD0x00D3EC/2022	EPI_ISL_11332063	2022-03-01	Sullivan Nicolaides Pathology	Public Health Virology - Forensic and Scientific Services	Chenwei Wang on behalf of Q-PHIRE Genomics et al
Australia/QLD0x00D403/2022	EPI_ISL_11332430	2022-03-07	Genomics for Life	Public Health Virology - Forensic and Scientific Services	Chenwei Wang on behalf of Q-PHIRE Genomics et al
Australia/QLD0x00D456/2022	EPI_ISL_11331994	2022-03-11	Sullivan Nicolaides Pathology	Public Health Virology - Forensic and Scientific Services	Chenwei Wang on behalf of Q-PHIRE Genomics et al
Australia/QLD0x00D45B/2022	EPI_ISL_11331935	2022-03-12	Sullivan Nicolaides Pathology	Public Health Virology - Forensic and Scientific Services	Chenwei Wang on behalf of Q-PHIRE Genomics et al
Australia/QLD0x00D46F/2022	EPI_ISL_11331991	2022-03-10	Sullivan Nicolaides Pathology	Public Health Virology - Forensic and Scientific Services	Chenwei Wang on behalf of Q-PHIRE Genomics et al
Australia/QLD0x00D47A/2022	EPI_ISL_11331952	2022-03-08	Sullivan Nicolaides Pathology	Public Health Virology - Forensic and Scientific Services	Chenwei Wang on behalf of Q-PHIRE Genomics et al
Australia/QLD0x00D47B/2022	EPI_ISL_11331954	2022-03-08	Sullivan Nicolaides Pathology	Public Health Virology - Forensic and Scientific Services	Chenwei Wang on behalf of Q-PHIRE Genomics et al
Australia/QLD0x00D484/2022	EPI_ISL_11331978	2022-03-06	Queensland Medical Laboratories	Public Health Virology - Forensic and Scientific Services	Chenwei Wang on behalf of Q-PHIRE Genomics et al
Australia/QLD0x00D4A9/2022	EPI_ISL_11332272	2022-03-01	Genomics for Life	Public Health Virology - Forensic and Scientific Services	Chenwei Wang on behalf of Q-PHIRE Genomics et al
Australia/QLD0x00D4CB/2022	EPI_ISL_11332303	2022-03-04	Sullivan Nicolaides Pathology	Public Health Virology - Forensic and Scientific Services	Chenwei Wang on behalf of Q-PHIRE Genomics et al
Australia/QLD0x00D4ED/2022	EPI_ISL_11332321	2022-03-07	Sullivan Nicolaides Pathology	Public Health Virology - Forensic and Scientific Services	Chenwei Wang on behalf of Q-PHIRE Genomics et al
Australia/QLD0x00D523/2022	EPI_ISL_11383879	2022-02-06	Sullivan Nicolaides Pathology	Public Health Virology - Forensic and Scientific Services	Chenwei Wang on behalf of Q-PHIRE Genomics et al
Australia/QLD0x00D565/2022	EPI_ISL_11383940	2022-03-21	Pathology Queensland and Forensic Scientific Services	Public Health Virology - Forensic and Scientific Services	Chenwei Wang on behalf of Q-PHIRE Genomics et al
Australia/QLD0x00D572/2022	EPI_ISL_11384017	2022-03-10	Queensland Medical Laboratories	Public Health Virology - Forensic and Scientific Services	Chenwei Wang on behalf of Q-PHIRE Genomics et al
Australia/QLD0x00D60A/2022	EPI_ISL_11383959	2022-03-09	Queensland Medical Laboratories	Public Health Virology - Forensic and Scientific Services	Chenwei Wang on behalf of Q-PHIRE Genomics et al
Australia/QLD0x00D617/2022	EPI_ISL_11383987	2022-03-09	Sullivan Nicolaides Pathology	Public Health Virology - Forensic and Scientific Services	Chenwei Wang on behalf of Q-PHIRE Genomics et al
Australia/QLD0x00D661/2022	EPI_ISL_11521988	2022-03-13	Genomics for Life	Public Health Virology - Forensic and Scientific Services	Patricia Wolf on behalf of Q-PHIRE Genomics et al
Australia/QLD0x00D688/2022	EPI_ISL_11522024	2022-03-14	Pathology Queensland: Forensic and Scientific Services	Public Health Virology - Forensic and Scientific Services	Patricia Wolf on behalf of Q-PHIRE Genomics et al
Australia/QLD0x00D6CB/2022	EPI_ISL_11522025	2022-03-14	Pathology Queensland: Forensic and Scientific Services	Public Health Virology - Forensic and Scientific Services	Patricia Wolf on behalf of Q-PHIRE Genomics et al
Australia/QLD0x00D6F9/2022	EPI_ISL_11522147	2022-03-02	Genomics for Life	Public Health Virology - Forensic and Scientific Services	Patricia Wolf on behalf of Q-PHIRE Genomics et al
Australia/QLD0x00D712/2022	EPI_ISL_11522151	2022-03-02	Genomics for Life	Public Health Virology - Forensic and Scientific Services	Patricia Wolf on behalf of Q-PHIRE Genomics et al
Australia/QLD0x00D718/2022	EPI_ISL_11522082	2022-03-02	Genomics for Life	Public Health Virology - Forensic and Scientific Services	Patricia Wolf on behalf of Q-PHIRE Genomics et al
Australia/QLD0x00D746/2022	EPI_ISL_11632883	2022-03-07	Pathology Queensland and Forensic Scientific Services	PHV-FSS	Mitchell Sullivan on behalf of Q-PHIRE Genomics et al
Australia/QLD0x00D757/2022	EPI_ISL_11632860	2022-03-13	Pathology Queensland and Forensic Scientific Services	PHV-FSS	Mitchell Sullivan on behalf of Q-PHIRE Genomics et al
Australia/QLD0x00D76A/2022	EPI_ISL_11632846	2022-03-14	Pathology Queensland and Forensic Scientific Services	PHV-FSS	Mitchell Sullivan on behalf of Q-PHIRE Genomics et al
Australia/QLD0x00D76E/2022	EPI_ISL_11632853	2022-03-14	Pathology Queensland and Forensic Scientific Services	PHV-FSS	Mitchell Sullivan on behalf of Q-PHIRE Genomics et al
Australia/QLD0x00D774/2022	EPI_ISL_11632869	2022-03-14	Pathology Queensland and Forensic Scientific Services	PHV-FSS	Mitchell Sullivan on behalf of Q-PHIRE Genomics et al
Australia/QLD0x00D776/2022	EPI_ISL_11632871	2022-03-14	Pathology Queensland and Forensic Scientific Services	PHV-FSS	Mitchell Sullivan on behalf of Q-PHIRE Genomics et al
Australia/QLD0x00D779/2022	EPI_ISL_11632878	2022-03-14	Pathology Queensland and Forensic Scientific Services	PHV-FSS	Mitchell Sullivan on behalf of Q-PHIRE Genomics et al
Australia/QLD0x00D77F/2022	EPI_ISL_11632825	2022-03-16	Pathology Queensland and Forensic Scientific Services	PHV-FSS	Mitchell Sullivan on behalf of Q-PHIRE Genomics et al
Australia/QLD0x00D790/2022	EPI_ISL_11632806	2022-02-28	Pathology Queensland and Forensic Scientific Services	PHV-FSS	Mitchell Sullivan on behalf of Q-PHIRE Genomics et al
Australia/QLD0x00D7A3/2022	EPI_ISL_11632808	2022-03-02	Pathology Queensland and Forensic Scientific Services	PHV-FSS	Mitchell Sullivan on behalf of Q-PHIRE Genomics et al
Australia/QLD0x00D7A8/2022	EPI_ISL_11632818	2022-03-02	Pathology Queensland and Forensic Scientific Services	PHV-FSS	Mitchell Sullivan on behalf of Q-PHIRE Genomics et al
Australia/QLD0x00D808/2022	EPI_ISL_11632728	2022-03-02	Pathology Queensland and Forensic Scientific Services	PHV-FSS	Mitchell Sullivan on behalf of Q-PHIRE Genomics et al
Australia/QLD0x00D864/2022	EPI_ISL_11632913	2022-03-05	Pathology Queensland and Forensic Scientific Services	PHV-FSS	Mitchell Sullivan on behalf of Q-PHIRE Genomics et al
Australia/QLD0x00D86A/2022	EPI_ISL_11632935	2022-03-07	Pathology Queensland and Forensic Scientific Services	PHV-FSS	Mitchell Sullivan on behalf of Q-PHIRE Genomics et al
Australia/QLD0x00D883/2022	EPI_ISL_11632932	2022-03-01	Pathology Queensland and Forensic Scientific Services	PHV-FSS	Mitchell Sullivan on behalf of Q-PHIRE Genomics et al
Australia/QLD0x00D89B/2022	EPI_ISL_11632655	2022-03-02	Pathology Queensland and Forensic Scientific Services	PHV-FSS	Mitchell Sullivan on behalf of Q-PHIRE Genomics et al
Australia/QLD0x00D8AC/2022	EPI_ISL_11632652	2022-03-07	Pathology Queensland and Forensic Scientific Services	PHV-FSS	Mitchell Sullivan on behalf of Q-PHIRE Genomics et al
Australia/QLD0x00D8C5/2022	EPI_ISL_11632647	2022-03-04	Mater Pathology	PHV-FSS	Mitchell Sullivan on behalf of Q-PHIRE Genomics et al
Australia/QLD0x00D8DE/2022	EPI_ISL_11632642	2022-03-04	Pathology Queensland and Forensic Scientific Services	PHV-FSS	Mitchell Sullivan on behalf of Q-PHIRE Genomics et al
Australia/QLD0x00D901/2022	EPI_ISL_11749809	2022-03-03	Genomics for Life	PHV-FSS	Chenwei Wang on behalf of Q-PHIRE Genomics et al
Australia/QLD0x00D921/2022	EPI_ISL_11749828	2022-03-04	Genomics for Life	PHV-FSS	Chenwei Wang on behalf of Q-PHIRE Genomics et al
Australia/QLD0x00D990/2022	EPI_ISL_11750076	2022-03-17	Pathology Queensland and Forensic Scientific Services	PHV-FSS	Chenwei Wang on behalf of Q-PHIRE Genomics et al
Australia/QLD0x00D9BF/2022	EPI_ISL_11749712	2022-03-16	Pathology Queensland and Forensic Scientific Services	PHV-FSS	Chenwei Wang on behalf of Q-PHIRE Genomics et al
Australia/QLD0x00DA9A/2022	EPI_ISL_11749862	2022-03-14	Pathology Queensland and Forensic Scientific Services	PHV-FSS	Chenwei Wang on behalf of Q-PHIRE Genomics et al
Australia/QLD0x00DA9D/2022	EPI_ISL_11749872	2022-03-14	Pathology Queensland and Forensic Scientific Services	PHV-FSS	Chenwei Wang on behalf of Q-PHIRE Genomics et al
Australia/QLD0x00DAAA/2022	EPI_ISL_11749858	2022-02-14	Pathology Queensland and Forensic Scientific Services	PHV-FSS	Chenwei Wang on behalf of Q-PHIRE Genomics et al
Australia/QLD0x00DAB3/2022	EPI_ISL_11749887	2022-03-10	Pathology Queensland and Forensic Scientific Services	PHV-FSS	Chenwei Wang on behalf of Q-PHIRE Genomics et al
Australia/QLD0x00DAB7/2022	EPI_ISL_11749892	2022-03-14	Pathology Queensland and Forensic Scientific Services	PHV-FSS	Chenwei Wang on behalf of Q-PHIRE Genomics et al
Australia/QLD0x00DAD8/2022	EPI_ISL_11749909	2022-02-15	Pathology Queensland and Forensic Scientific Services	PHV-FSS	Chenwei Wang on behalf of Q-PHIRE Genomics et al
Australia/QLD0x00DADD/2022	EPI_ISL_11749852	2022-02-16	Pathology Queensland and Forensic Scientific Services	PHV-FSS	Chenwei Wang on behalf of Q-PHIRE Genomics et al
Australia/QLD0x00DAE1/2022	EPI_ISL_11749876	2022-02-14	Pathology Queensland and Forensic Scientific Services	PHV-FSS	Chenwei Wang on behalf of Q-PHIRE Genomics et al
Australia/QLD0x00DB02/2022	EPI_ISL_11800048	2022-03-26	Pathology Queensland and Forensic Scientific Services	Public Health Virology - Forensic and Scientific Services	Son Nguyen on behalf of Q-PHIRE Genomics et al
Australia/QLD0x00DB10/2022	EPI_ISL_11800017	2022-03-23	Pathology Queensland and Forensic Scientific Services	Public Health Virology - Forensic and Scientific Services	Son Nguyen on behalf of Q-PHIRE Genomics et al
Australia/QLD0x00DB13/2022	EPI_ISL_11800022	2022-03-23	Pathology Queensland and Forensic Scientific Services	Public Health Virology - Forensic and Scientific Services	Son Nguyen on behalf of Q-PHIRE Genomics et al
Australia/QLD0x00DB1A/2022	EPI_ISL_11800039	2022-03-21	Pathology Queensland and Forensic Scientific Services	Public Health Virology - Forensic and Scientific Services	Son Nguyen on behalf of Q-PHIRE Genomics et al
Australia/QLD0x00DBAC/2022	EPI_ISL_11865353	2022-03-10	Pathology Queensland and Forensic Scientific Services	PHV-FSS	Son Nguyen on behalf of Q-PHIRE Genomics et al
Australia/QLD0x00DBCF/2022	EPI_ISL_11865367	2022-03-20	Pathology Queensland and Forensic Scientific Services	PHV-FSS	Son Nguyen on behalf of Q-PHIRE Genomics et al
Australia/QLD0x00DBDE/2022	EPI_ISL_11865589	2022-03-21	Pathology Queensland and Forensic Scientific Services	PHV-FSS	Son Nguyen on behalf of Q-PHIRE Genomics et al
Australia/QLD0x00DBF9/2022	EPI_ISL_11865590	2022-03-19	Pathology Queensland and Forensic Scientific Services	PHV-FSS	Son Nguyen on behalf of Q-PHIRE Genomics et al
Australia/QLD0x00DC17/2022	EPI_ISL_11865600	2022-03-19	Pathology Queensland and Forensic Scientific Services	PHV-FSS	Son Nguyen on behalf of Q-PHIRE Genomics et al
Australia/QLD0x00DC23/2022	EPI_ISL_11865378	2022-03-24	Pathology Queensland and Forensic Scientific Services	PHV-FSS	Son Nguyen on behalf of Q-PHIRE Genomics et al
Australia/QLD0x00DC78/2022	EPI_ISL_11865511	2022-03-25	Pathology Queensland and Forensic Scientific Services	PHV-FSS	Son Nguyen on behalf of Q-PHIRE Genomics et al
Australia/QLD0x00DC8C/2022	EPI_ISL_11865383	2022-03-24	Pathology Queensland and Forensic Scientific Services	PHV-FSS	Son Nguyen on behalf of Q-PHIRE Genomics et al
Australia/QLD0x00DC8E/2022	EPI_ISL_11865387	2022-03-24	Pathology Queensland and Forensic Scientific Services	PHV-FSS	Son Nguyen on behalf of Q-PHIRE Genomics et al
Australia/QLD0x00DCA1/2022	EPI_ISL_11865427	2022-03-20	Pathology Queensland and Forensic Scientific Services	PHV-FSS	Son Nguyen on behalf of Q-PHIRE Genomics et al
Australia/QLD0x00DCA8/2022	EPI_ISL_11865439	2022-03-20	Pathology Queensland and Forensic Scientific Services	PHV-FSS	Son Nguyen on behalf of Q-PHIRE Genomics et al
Australia/QLD0x00DCD4/2022	EPI_ISL_11865543	2022-04-02	Pathology Queensland and Forensic Scientific Services	PHV-FSS	Son Nguyen on behalf of Q-PHIRE Genomics et al
Australia/QLD0x00DD00/2022	EPI_ISL_11941185	2022-03-22	Forensic and Scientific Services	Public Health Virology - Forensic and Scientific Services	Mitchell Sullivan on behalf of Q-PHIRE Genomics et al
Australia/QLD0x00DD12/2022	EPI_ISL_11941232	2022-03-21	Forensic and Scientific Services	Public Health Virology - Forensic and Scientific Services	Mitchell Sullivan on behalf of Q-PHIRE Genomics et al
Australia/QLD0x00DDCB/2022	EPI_ISL_11941344	2022-03-27	Forensic and Scientific Services	Public Health Virology - Forensic and Scientific Services	Mitchell Sullivan on behalf of Q-PHIRE Genomics et al
Australia/QLD0x00DDD7/2022	EPI_ISL_11941368	2022-03-29	Forensic and Scientific Services	Public Health Virology - Forensic and Scientific Services	Mitchell Sullivan on behalf of Q-PHIRE Genomics et al
Australia/QLD0x00DDF3/2022	EPI_ISL_11941156	2022-03-30	Forensic and Scientific Services	Public Health Virology - Forensic and Scientific Services	Mitchell Sullivan on behalf of Q-PHIRE Genomics et al
Australia/QLD0x00DE1B/2022	EPI_ISL_11941118	2022-03-30	Forensic and Scientific Services	Public Health Virology - Forensic and Scientific Services	Mitchell Sullivan on behalf of Q-PHIRE Genomics et al
Australia/QLD0x00DE55/2022	EPI_ISL_12048739	2022-04-01	Pathology Queensland and Forensic Scientific Services	PHV-FSS	Mitchell Sullivan on behalf of Q-PHIRE Genomics et al
Australia/QLD0x00DE5E/2022	EPI_ISL_12048767	2022-03-29	4 Cyte Pathology	PHV-FSS	Mitchell Sullivan on behalf of Q-PHIRE Genomics et al
Australia/QLD0x00DE66/2022	EPI_ISL_12048712	2022-03-30	Pathology Queensland and Forensic Scientific Services	PHV-FSS	Mitchell Sullivan on behalf of Q-PHIRE Genomics et al
Australia/QLD0x00DE68/2022	EPI_ISL_12048716	2022-03-30	Pathology Queensland and Forensic Scientific Services	PHV-FSS	Mitchell Sullivan on behalf of Q-PHIRE Genomics et al
Australia/QLD0x00DE69/2022	EPI_ISL_12048717	2022-03-30	Pathology Queensland and Forensic Scientific Services	PHV-FSS	Mitchell Sullivan on behalf of Q-PHIRE Genomics et al
Australia/QLD0x00DE9C/2022	EPI_ISL_12048449	2022-03-22	Pathology Queensland and Forensic Scientific Services	PHV-FSS	Mitchell Sullivan on behalf of Q-PHIRE Genomics et al
Australia/QLD0x00DED3/2022	EPI_ISL_12048483	2022-03-30	Pathology Queensland and Forensic Scientific Services	PHV-FSS	Mitchell Sullivan on behalf of Q-PHIRE Genomics et al
Australia/QLD0x00DF13/2022	EPI_ISL_12048800	2022-04-02	Pathology Queensland and Forensic Scientific Services	PHV-FSS	Mitchell Sullivan on behalf of Q-PHIRE Genomics et al
Australia/QLD0x00DF1C/2022	EPI_ISL_12048818	2022-04-01	Pathology Queensland and Forensic Scientific Services	PHV-FSS	Mitchell Sullivan on behalf of Q-PHIRE Genomics et al
Australia/QLD0x00DF21/2022	EPI_ISL_12048838	2022-04-01	Pathology Queensland and Forensic Scientific Services	PHV-FSS	Mitchell Sullivan on behalf of Q-PHIRE Genomics et al
Australia/QLD0x00DF86/2022	EPI_ISL_12048577	2022-04-01	Pathology Queensland and Forensic Scientific Services	PHV-FSS	Mitchell Sullivan on behalf of Q-PHIRE Genomics et al
Australia/QLD0x00DFA8/2022	EPI_ISL_12048644	2022-04-04	Pathology Queensland and Forensic Scientific Services	PHV-FSS	Mitchell Sullivan on behalf of Q-PHIRE Genomics et al
Australia/QLD0x00DFEE/2022	EPI_ISL_12048537	2022-03-07	Pathology Queensland and Forensic Scientific Services	PHV-FSS	Mitchell Sullivan on behalf of Q-PHIRE Genomics et al
Australia/QLD0x00DFF9/2022	EPI_ISL_12048511	2022-03-29	Pathology Queensland and Forensic Scientific Services	PHV-FSS	Mitchell Sullivan on behalf of Q-PHIRE Genomics et al
Australia/QLD0x00E007/2022	EPI_ISL_12048525	2022-04-06	Pathology Queensland and Forensic Scientific Services	PHV-FSS	Mitchell Sullivan on behalf of Q-PHIRE Genomics et al
Australia/QLD0x00E045/2022	EPI_ISL_12135322	2022-04-05	Pathology Queensland and Forensic Scientific Services	PHV-FSS	Patricia Wolf on behalf of Q-PHIRE Genomics et al
Australia/QLD0x00E094/2022	EPI_ISL_12220609	2022-03-07	Forensic and Scientific Services	Public Health Virology Laboratory, Forensic and Scientific Services (PHV-FSS)	Patricia Wolf on behalf of Q-PHIRE Genomics et al
Australia/QLD0x00E095/2022	EPI_ISL_12220611	2022-03-07	Forensic and Scientific Services	Public Health Virology Laboratory, Forensic and Scientific Services (PHV-FSS)	Patricia Wolf on behalf of Q-PHIRE Genomics et al
Australia/QLD0x00E0DC/2022	EPI_ISL_12220586	2022-03-07	Forensic and Scientific Services	Public Health Virology Laboratory, Forensic and Scientific Services (PHV-FSS)	Patricia Wolf on behalf of Q-PHIRE Genomics et al
Australia/QLD0x00E116/2022	EPI_ISL_12220553	2022-04-04	Forensic and Scientific Services	Public Health Virology Laboratory, Forensic and Scientific Services (PHV-FSS)	Patricia Wolf on behalf of Q-PHIRE Genomics et al
Australia/QLD0x00E14F/2022	EPI_ISL_12220473	2022-03-31	4Cyte Pathology	Public Health Virology Laboratory, Forensic and Scientific Services (PHV-FSS)	Patricia Wolf on behalf of Q-PHIRE Genomics et al
Australia/QLD0x00E18F/2022	EPI_ISL_12220650	2022-04-02	4Cyte Pathology	Public Health Virology Laboratory, Forensic and Scientific Services (PHV-FSS)	Patricia Wolf on behalf of Q-PHIRE Genomics et al
Australia/QLD0x00E1B4/2022	EPI_ISL_12220712	2022-04-04	Genomics for Life	Public Health Virology Laboratory, Forensic and Scientific Services (PHV-FSS)	Patricia Wolf on behalf of Q-PHIRE Genomics et al
Australia/QLD0x00E1BB/2022	EPI_ISL_12308062	2022-03-06	Forensic and Scientific Services	Public Health Virology - Forensic and Scientific Services (FSS)	Patricia Wolf on behalf of Q-PHIRE Genomics et al
Australia/QLD0x00E1C1/2022	EPI_ISL_12308085	2022-03-05	Forensic and Scientific Services	Public Health Virology - Forensic and Scientific Services (FSS)	Patricia Wolf on behalf of Q-PHIRE Genomics et al
Australia/QLD0x00E1C2/2022	EPI_ISL_12308088	2022-03-05	Forensic and Scientific Services	Public Health Virology - Forensic and Scientific Services (FSS)	Patricia Wolf on behalf of Q-PHIRE Genomics et al
Australia/QLD0x00E20A/2022	EPI_ISL_12308067	2022-04-03	Genomics for Life	Public Health Virology - Forensic and Scientific Services (FSS)	Patricia Wolf on behalf of Q-PHIRE Genomics et al
Australia/QLD0x00E23E/2022	EPI_ISL_12308139	2022-04-09	Forensic and Scientific Services	Public Health Virology - Forensic and Scientific Services (FSS)	Patricia Wolf on behalf of Q-PHIRE Genomics et al
Australia/QLD0x00E24C/2022	EPI_ISL_12308178	2022-04-08	Forensic and Scientific Services	Public Health Virology - Forensic and Scientific Services (FSS)	Patricia Wolf on behalf of Q-PHIRE Genomics et al
Australia/QLD0x00E2A2/2022	EPI_ISL_12386671	2022-04-12	Forensic and Scientific Services	Public Health Virology Laboratory, Forensic and Scientific Services (PHV-FSS)	Patricia Wolf on behalf of Q-PHIRE Genomics et al
Australia/QLD0x00E2F7/2022	EPI_ISL_12386611	2022-04-12	Forensic and Scientific Services	Public Health Virology Laboratory, Forensic and Scientific Services (PHV-FSS)	Patricia Wolf on behalf of Q-PHIRE Genomics et al
Australia/QLD0x00E3E8/2022	EPI_ISL_12433378	2022-04-16	Pathology Queensland and Forensic Scientific Services	Public Health Virology - Forensic and Scientific Services (FSS)	Patricia Wolf on behalf of Q-PHIRE Genomics et al
Australia/QLD0x00E499/2022	EPI_ISL_12531811	2022-04-26	Pathology Queensland and Forensic Scientific Services	PHV-FSS	Son Nguyen on behalf of Q-PHIRE Genomics et al
Australia/QLD0x00E49A/2022	EPI_ISL_12531799	2022-04-26	Pathology Queensland and Forensic Scientific Services	PHV-FSS	Son Nguyen on behalf of Q-PHIRE Genomics et al
Australia/QLD0x00E506/2022	EPI_ISL_12531818	2022-04-19	Pathology Queensland and Forensic Scientific Services	PHV-FSS	Son Nguyen on behalf of Q-PHIRE Genomics et al
Australia/QLD0x00E527/2022	EPI_ISL_12531783	2022-04-25	Pathology Queensland and Forensic Scientific Services	PHV-FSS	Son Nguyen on behalf of Q-PHIRE Genomics et al
Australia/QLD0x00E55B/2022	EPI_ISL_12531810	2022-04-24	Pathology Queensland and Forensic Scientific Services	PHV-FSS	Son Nguyen on behalf of Q-PHIRE Genomics et al
Australia/QLD0x00E55D/2022	EPI_ISL_12531750	2022-04-25	Pathology Queensland and Forensic Scientific Services	PHV-FSS	Son Nguyen on behalf of Q-PHIRE Genomics et al
Australia/QLD0x00E606/2022	EPI_ISL_12644966	2022-04-25	Pathology Queensland and Forensic Scientific Services	Public Health Virology - Forensic and Scientific Services (PHV-FSS)	Mitchell Sullivan on behalf of Q-PHIRE Genomics et al
Australia/QLD0x00E61E/2022	EPI_ISL_12645175	2022-03-05	Pathology Queensland and Forensic Scientific Services	Public Health Virology - Forensic and Scientific Services (PHV-FSS)	Mitchell Sullivan on behalf of Q-PHIRE Genomics et al
Australia/QLD0x00E620/2022	EPI_ISL_12645120	2022-03-05	Pathology Queensland and Forensic Scientific Services	Public Health Virology - Forensic and Scientific Services (PHV-FSS)	Mitchell Sullivan on behalf of Q-PHIRE Genomics et al
Australia/QLD0x00E700/2022	EPI_ISL_12693864	2022-04-22	Sullivan Nicolaides Pathology	Public Health Virology - Forensic and Scientific Services (PHV - FSS)	Mitchell Sullivan on behalf of Q-PHIRE Genomics et al
Australia/QLD0x00E705/2022	EPI_ISL_12693868	2022-04-21	Sullivan Nicolaides Pathology	Public Health Virology - Forensic and Scientific Services (PHV - FSS)	Mitchell Sullivan on behalf of Q-PHIRE Genomics et al
Australia/QLD0x00E910/2022	EPI_ISL_12807362	2022-04-09	Pathology Queensland and Forensic Scientific Services	PHV-FSS	Son Nguyen on behalf of Q-PHIRE Genomics et al
Australia/QLD0x00E92D/2022	EPI_ISL_12807365	2022-04-29	Pathology Queensland and Forensic Scientific Services	PHV-FSS	Son Nguyen on behalf of Q-PHIRE Genomics et al
Australia/QLD0x00E9DA/2022	EPI_ISL_12870238	2022-05-08	Pathology Queensland and Forensic Scientific Services	Public Health Virology - Forensic and Scientific Services (PHV-FSS)	Chenwei Wang on behalf of Q-PHIRE Genomics et al
Australia/QLD16034/2022	EPI_ISL_9639344	2022-01-01	PHV-FSS	PHV-FSS	Chenwei Wang on behalf of Q-PHIRE Genomics et al
Australia/QLD25380/2022	EPI_ISL_9639853	2022-01-05	PHV-FSS	PHV-FSS	Chenwei Wang on behalf of Q-PHIRE Genomics et al
Australia/QLD2617/2021	EPI_ISL_7674636	2021-12-11	PHV-FSS	PHV-FSS	Chenwei Wang on behalf of Q-PHIRE Genomics et al
Australia/QLD26220/2022	EPI_ISL_10262577	2022-01-05	Pathology Queensland and Forensic Scientific Services	PHV-FSS	Chenwei Wang on behalf of Q-PHIRE Genomics et al
Australia/QLD2817/2021	EPI_ISL_8132570	2021-12-19	PHV-FSS	PHV-FSS	Chenwei Wang on behalf of Q-PHIRE Genomics et al
Australia/QLD2857/2021	EPI_ISL_8132577	2021-12-19	PHV-FSS	PHV-FSS	Chenwei Wang on behalf of Q-PHIRE Genomics et al
Australia/QLD29559/2022	EPI_ISL_10262240	2022-01-05	Pathology Queensland and Forensic Scientific Services	PHV-FSS	Chenwei Wang on behalf of Q-PHIRE Genomics et al
Australia/QLD30131/2022	EPI_ISL_9639783	2022-01-04	PHV-FSS	PHV-FSS	Chenwei Wang on behalf of Q-PHIRE Genomics et al
Australia/QLD30148/2022	EPI_ISL_9639831	2022-01-04	PHV-FSS	PHV-FSS	Chenwei Wang on behalf of Q-PHIRE Genomics et al
Australia/QLD33546/2022	EPI_ISL_9639792	2022-01-06	PHV-FSS	PHV-FSS	Chenwei Wang on behalf of Q-PHIRE Genomics et al
Australia/QLD37219/2022	EPI_ISL_10263462	2022-01-04	Pathology Queensland and Forensic Scientific Services	PHV-FSS	Chenwei Wang on behalf of Q-PHIRE Genomics et al
Australia/QLD37272/2022	EPI_ISL_10262068	2022-01-08	Pathology Queensland and Forensic Scientific Services	PHV-FSS	Chenwei Wang on behalf of Q-PHIRE Genomics et al
Australia/QLD3735/2021	EPI_ISL_8216053	2021-12-21	unknown	PHV-FSS	Son Nguyen on behalf of Q-PHIRE Genomics et al
Australia/QLD37636/2022	EPI_ISL_9639978	2022-01-10	PHV-FSS	PHV-FSS	Chenwei Wang on behalf of Q-PHIRE Genomics et al
Australia/QLD37667/2022	EPI_ISL_10263189	2022-01-09	Pathology Queensland and Forensic Scientific Services	PHV-FSS	Chenwei Wang on behalf of Q-PHIRE Genomics et al
Australia/QLD37827/2022	EPI_ISL_10262406	2022-01-08	Pathology Queensland and Forensic Scientific Services	PHV-FSS	Chenwei Wang on behalf of Q-PHIRE Genomics et al
Australia/QLD37872/2022	EPI_ISL_10263116	2022-01-07	Pathology Queensland and Forensic Scientific Services	PHV-FSS	Chenwei Wang on behalf of Q-PHIRE Genomics et al
Australia/QLD3807/2021	EPI_ISL_8216050	2021-12-21	unknown	PHV-FSS	Son Nguyen on behalf of Q-PHIRE Genomics et al
Australia/QLD38233/2022	EPI_ISL_10263436	2022-01-08	Pathology Queensland and Forensic Scientific Services	PHV-FSS	Chenwei Wang on behalf of Q-PHIRE Genomics et al
Australia/QLD38362/2022	EPI_ISL_10263260	2022-01-11	Pathology Queensland and Forensic Scientific Services	PHV-FSS	Chenwei Wang on behalf of Q-PHIRE Genomics et al
Australia/QLD38476/2022	EPI_ISL_9639602	2022-01-13	PHV-FSS	PHV-FSS	Chenwei Wang on behalf of Q-PHIRE Genomics et al
Australia/QLD38597/2022	EPI_ISL_10262443	2022-01-13	Pathology Queensland and Forensic Scientific Services	PHV-FSS	Chenwei Wang on behalf of Q-PHIRE Genomics et al
Australia/QLD38877/2022	EPI_ISL_10262157	2022-01-15	Pathology Queensland and Forensic Scientific Services	PHV-FSS	Chenwei Wang on behalf of Q-PHIRE Genomics et al
Australia/QLD38986/2022	EPI_ISL_10263548	2022-01-15	Pathology Queensland and Forensic Scientific Services	PHV-FSS	Chenwei Wang on behalf of Q-PHIRE Genomics et al
Australia/QLD39028/2022	EPI_ISL_10261451	2022-01-15	Pathology Queensland and Forensic Scientific Services	PHV-FSS	Chenwei Wang on behalf of Q-PHIRE Genomics et al
Australia/QLD39124/2022	EPI_ISL_10261830	2022-01-17	Pathology Queensland and Forensic Scientific Services	PHV-FSS	Chenwei Wang on behalf of Q-PHIRE Genomics et al
Australia/QLD39136/2022	EPI_ISL_10262361	2022-01-17	Pathology Queensland and Forensic Scientific Services	PHV-FSS	Chenwei Wang on behalf of Q-PHIRE Genomics et al
Australia/QLD39435/2022	EPI_ISL_10261649	2022-01-17	Pathology Queensland and Forensic Scientific Services	PHV-FSS	Chenwei Wang on behalf of Q-PHIRE Genomics et al
Australia/QLD39459/2022	EPI_ISL_10261428	2022-01-21	Pathology Queensland and Forensic Scientific Services	PHV-FSS	Chenwei Wang on behalf of Q-PHIRE Genomics et al
Australia/QLD39463/2022	EPI_ISL_10262738	2022-01-12	Pathology Queensland and Forensic Scientific Services	PHV-FSS	Chenwei Wang on behalf of Q-PHIRE Genomics et al
Australia/QLD39629/2022	EPI_ISL_10262825	2022-01-22	Pathology Queensland and Forensic Scientific Services	PHV-FSS	Chenwei Wang on behalf of Q-PHIRE Genomics et al
Australia/QLD39869/2022	EPI_ISL_10262906	2022-01-22	Pathology Queensland and Forensic Scientific Services	PHV-FSS	Chenwei Wang on behalf of Q-PHIRE Genomics et al
Australia/QLD4373/2021	EPI_ISL_8598233	2021-12-23	PHV-FSS	PHV-FSS	Chenwei Wang on behalf of Q-PHIRE Genomics et al
Australia/QLD44535/2022	EPI_ISL_10262991	2022-01-29	Pathology Queensland and Forensic Scientific Services	PHV-FSS	Chenwei Wang on behalf of Q-PHIRE Genomics et al
Australia/QLD44539/2022	EPI_ISL_10262997	2022-01-29	Pathology Queensland and Forensic Scientific Services	PHV-FSS	Chenwei Wang on behalf of Q-PHIRE Genomics et al
Australia/QLD4743/2021	EPI_ISL_8437671	2021-12-24	PHV-FSS	PHV-FSS	Chenwei Wang on behalf of Q-PHIRE Genomics et al
Australia/QLD4986/2021	EPI_ISL_8437765	2021-12-25	PHV-FSS	PHV-FSS	Chenwei Wang on behalf of Q-PHIRE Genomics et al
Australia/QLD5366/2021	EPI_ISL_8438410	2021-12-24	PHV-FSS	PHV-FSS	Chenwei Wang on behalf of Q-PHIRE Genomics et al
Australia/QLD6135/2021	EPI_ISL_8438281	2021-12-28	PHV-FSS	PHV-FSS	Chenwei Wang on behalf of Q-PHIRE Genomics et al
Australia/SA103779/2022	EPI_ISL_10255814	2022-01-29	SA Pathology	SA Pathology	Caitlin Selway et al
Australia/SA106703/2022	EPI_ISL_9949575	2022-02-01	SA Pathology	SA Pathology	Caitlin Selway et al
Australia/SA109051/2022	EPI_ISL_9949547	2022-02-02	SA Pathology	SA Pathology	Caitlin Selway et al
Australia/SA110276/2022	EPI_ISL_9949552	2022-02-02	SA Pathology	SA Pathology	Caitlin Selway et al
Australia/SA113002/2022	EPI_ISL_10238961	2022-02-05	SA Pathology	SA Pathology	Caitlin Selway et al
Australia/SA115430/2022	EPI_ISL_10255852	2022-02-08	SA Pathology	SA Pathology	Caitlin Selway et al
Australia/SA116780/2022	EPI_ISL_10255878	2022-02-09	SA Pathology	SA Pathology	Caitlin Selway et al
Australia/SA116784/2022	EPI_ISL_10774213	2022-02-09	SA Pathology	SA Pathology	Caitlin Selway et al
Australia/SA117405/2022	EPI_ISL_10255895	2022-02-10	SA Pathology	SA Pathology	Caitlin Selway et al
Australia/SA117850/2022	EPI_ISL_10255951	2022-02-10	SA Pathology	SA Pathology	Caitlin Selway et al
Australia/SA119839/2022	EPI_ISL_10774047	2022-02-12	SA Pathology	SA Pathology	Caitlin Selway et al
Australia/SA121674/2022	EPI_ISL_10774220	2022-02-14	SA Pathology	SA Pathology	Caitlin Selway et al
Australia/SA121763/2022	EPI_ISL_10774069	2022-02-14	SA Pathology	SA Pathology	Caitlin Selway et al
Australia/SA122039/2022	EPI_ISL_10774077	2022-02-15	SA Pathology	SA Pathology	Caitlin Selway et al
Australia/SA123022/2022	EPI_ISL_10774111	2022-02-16	SA Pathology	SA Pathology	Caitlin Selway et al
Australia/SA126550/2022	EPI_ISL_10774143	2022-02-17	SA Pathology	SA Pathology	Caitlin Selway et al
Australia/SA127435/2022	EPI_ISL_10774148	2022-02-19	SA Pathology	SA Pathology	Caitlin Selway et al
Australia/SA127657/2022	EPI_ISL_10774149	2022-02-19	SA Pathology	SA Pathology	Caitlin Selway et al
Australia/SA127945/2022	EPI_ISL_10774154	2022-02-19	SA Pathology	SA Pathology	Caitlin Selway et al
Australia/SA128768/2022	EPI_ISL_10774169	2022-02-20	SA Pathology	SA Pathology	Caitlin Selway et al
Australia/SA129416/2022	EPI_ISL_10774192	2022-02-21	SA Pathology	SA Pathology	Caitlin Selway et al
Australia/SA132968/2022	EPI_ISL_10774335	2022-02-23	SA Pathology	SA Pathology	Caitlin Selway et al
Australia/SA133067/2022	EPI_ISL_10774336	2022-02-23	SA Pathology	SA Pathology	Caitlin Selway et al
Australia/SA134118/2022	EPI_ISL_10774353	2022-02-26	SA Pathology	SA Pathology	Caitlin Selway et al
Australia/SA134833/2022	EPI_ISL_10981699	2022-02-27	SA Pathology	SA Pathology	Caitlin Selway et al
Australia/SA135697/2022	EPI_ISL_10774388	2022-02-28	SA Pathology	SA Pathology	Caitlin Selway et al
Australia/SA135748/2022	EPI_ISL_10774396	2022-02-28	SA Pathology	SA Pathology	Caitlin Selway et al
Australia/SA138657/2022	EPI_ISL_10981659	2022-03-02	SA Pathology	SA Pathology	Caitlin Selway et al
Australia/SA138694/2022	EPI_ISL_10981660	2022-03-02	SA Pathology	SA Pathology	Caitlin Selway et al
Australia/SA138891/2022	EPI_ISL_10981665	2022-03-02	SA Pathology	SA Pathology	Caitlin Selway et al
Australia/SA150782/2022	EPI_ISL_12039231	2022-03-10	SA Pathology	SA Pathology	Caitlin Selway et al
Australia/SA150798/2022	EPI_ISL_12039234	2022-03-10	SA Pathology	SA Pathology	Caitlin Selway et al
Australia/SA150814/2022	EPI_ISL_12039237	2022-03-10	SA Pathology	SA Pathology	Caitlin Selway et al
Australia/SA150864/2022	EPI_ISL_12039242	2022-03-10	SA Pathology	SA Pathology	Caitlin Selway et al
Australia/SA150948/2022	EPI_ISL_12039243	2022-03-10	SA Pathology	SA Pathology	Caitlin Selway et al
Australia/SA153277/2022	EPI_ISL_12039261	2022-03-12	SA Pathology	SA Pathology	Caitlin Selway et al
Australia/SA154857/2022	EPI_ISL_12039278	2022-03-13	SA Pathology	SA Pathology	Caitlin Selway et al
Australia/SA155709/2022	EPI_ISL_12039284	2022-03-14	SA Pathology	SA Pathology	Caitlin Selway et al
Australia/SA156097/2022	EPI_ISL_12039308	2022-03-14	SA Pathology	SA Pathology	Caitlin Selway et al
Australia/SA161009/2022	EPI_ISL_12039354	2022-03-16	SA Pathology	SA Pathology	Caitlin Selway et al
Australia/SA161086/2022	EPI_ISL_12039356	2022-03-16	SA Pathology	SA Pathology	Caitlin Selway et al
Australia/SA162995/2022	EPI_ISL_12039386	2022-03-17	SA Pathology	SA Pathology	Caitlin Selway et al
Australia/SA166944/2022	EPI_ISL_12039570	2022-03-19	SA Pathology	SA Pathology	Caitlin Selway et al
Australia/SA173306/2022	EPI_ISL_12039585	2022-03-22	SA Pathology	SA Pathology	Caitlin Selway et al
Australia/SA189147/2022	EPI_ISL_12039879	2022-03-30	SA Pathology	SA Pathology	Caitlin Selway et al
Australia/SA191955/2022	EPI_ISL_12039722	2022-03-31	SA Pathology	SA Pathology	Caitlin Selway et al
Australia/SA229709/2022	EPI_ISL_12442752	2022-04-12	SA Pathology	SA Pathology	Caitlin Selway et al
Australia/SA229846/2022	EPI_ISL_12442854	2022-04-12	SA Pathology	SA Pathology	Caitlin Selway et al
Australia/SA62683/2022	EPI_ISL_9222837	2022-01-13	SA Pathology	SA Pathology	Caitlin Selway et al
Australia/SA63729/2022	EPI_ISL_9222842	2022-01-13	SA Pathology	SA Pathology	Caitlin Selway et al
Australia/SA65217/2022	EPI_ISL_9222849	2022-01-14	SA Pathology	SA Pathology	Caitlin Selway et al
Australia/SA82292/2022	EPI_ISL_9949347	2022-01-19	SA Pathology	SA Pathology	Caitlin Selway et al
Australia/SA92454/2022	EPI_ISL_10238944	2022-01-26	SA Pathology	SA Pathology	Caitlin Selway et al
Australia/SA97996/2022	EPI_ISL_9949391	2022-01-26	SA Pathology	SA Pathology	Caitlin Selway et al
Australia/SA99105/2022	EPI_ISL_9949490	2022-01-27	SA Pathology	SA Pathology	Caitlin Selway et al
Australia/TAS001015/2022	EPI_ISL_11019788	2022	Royal Hobart Hospital	Royal Hobart Hospital	J Williamson et al
Australia/TAS001018/2022	EPI_ISL_11019791	2022	Royal Hobart Hospital	Royal Hobart Hospital	J Williamson et al
Australia/TAS001026/2022	EPI_ISL_11019799	2022	Royal Hobart Hospital	Royal Hobart Hospital	J Williamson et al
Australia/TAS001027/2022	EPI_ISL_11019800	2022	Royal Hobart Hospital	Royal Hobart Hospital	J Williamson et al
Australia/TAS001059/2022	EPI_ISL_11019832	2022	Royal Hobart Hospital	Royal Hobart Hospital	J Williamson et al
Australia/TAS001061/2022	EPI_ISL_11019834	2022	Royal Hobart Hospital	Royal Hobart Hospital	J Williamson et al
Australia/TAS001064/2022	EPI_ISL_11019837	2022	Royal Hobart Hospital	Royal Hobart Hospital	J Williamson et al
Australia/TAS001076/2022	EPI_ISL_11019849	2022	Royal Hobart Hospital	Royal Hobart Hospital	J Williamson et al
Australia/TAS001087/2022	EPI_ISL_11019860	2022	Royal Hobart Hospital	Royal Hobart Hospital	J Williamson et al
Australia/TAS001112/2022	EPI_ISL_11834228	2022-03-01	Royal Hobart Hospital	Royal Hobart Hospital	J Williamson et al
Australia/TAS001115/2022	EPI_ISL_11834229	2022-03-02	Royal Hobart Hospital	Royal Hobart Hospital	J Williamson et al
Australia/TAS001169/2022	EPI_ISL_11834249	2022-03-09	Royal Hobart Hospital	Royal Hobart Hospital	J Williamson et al
Australia/TAS001170/2022	EPI_ISL_11834250	2022-03-09	Royal Hobart Hospital	Royal Hobart Hospital	J Williamson et al
Australia/TAS001181/2022	EPI_ISL_11834261	2022-03-08	Royal Hobart Hospital	Royal Hobart Hospital	J Williamson et al
Australia/TAS001190/2022	EPI_ISL_11834270	2022-03-05	Royal Hobart Hospital	Royal Hobart Hospital	J Williamson et al
Australia/TAS001192/2022	EPI_ISL_11834272	2022-03-05	Royal Hobart Hospital	Royal Hobart Hospital	J Williamson et al
Australia/TAS001214/2022	EPI_ISL_11834294	2022-03-05	Royal Hobart Hospital	Royal Hobart Hospital	J Williamson et al
Australia/TAS001218/2022	EPI_ISL_11834298	2022-03-11	Royal Hobart Hospital	Royal Hobart Hospital	J Williamson et al
Australia/TAS001273/2022	EPI_ISL_11834353	2022-03-19	Royal Hobart Hospital	Royal Hobart Hospital	J Williamson et al
Australia/TAS001278/2022	EPI_ISL_11834358	2022-03-18	Royal Hobart Hospital	Royal Hobart Hospital	J Williamson et al
Australia/TAS001286/2022	EPI_ISL_11834365	2022-03-13	Royal Hobart Hospital	Royal Hobart Hospital	J Williamson et al
Australia/TAS001316/2022	EPI_ISL_11834394	2022-03-22	Royal Hobart Hospital	Royal Hobart Hospital	J Williamson et al
Australia/TAS001387/2022	EPI_ISL_11834457	2022-03-23	Royal Hobart Hospital	Royal Hobart Hospital	J Williamson et al
Australia/TAS001395/2022	EPI_ISL_11834465	2022-03-23	Royal Hobart Hospital	Royal Hobart Hospital	J Williamson et al
Australia/TAS001397/2022	EPI_ISL_11834467	2022-03-23	Royal Hobart Hospital	Royal Hobart Hospital	J Williamson et al
Australia/TAS001409/2022	EPI_ISL_11834477	2022-03-26	Royal Hobart Hospital	Royal Hobart Hospital	J Williamson et al
Australia/TAS001433/2022	EPI_ISL_11834501	2022-03-26	Royal Hobart Hospital	Royal Hobart Hospital	J Williamson et al
Australia/TAS001458/2022	EPI_ISL_11834514	2022-03-29	Royal Hobart Hospital	Royal Hobart Hospital	J Williamson et al
Australia/TAS001469/2022	EPI_ISL_11834525	2022-03-27	Royal Hobart Hospital	Royal Hobart Hospital	J Williamson et al
Australia/TAS001538/2022	EPI_ISL_11834591	2022-04-04	Royal Hobart Hospital	Royal Hobart Hospital	J Williamson et al
Australia/TAS001545/2022	EPI_ISL_12385757	2022-03-29	Royal Hobart Hospital	Royal Hobart Hospital	J Williamson et al
Australia/TAS001571/2022	EPI_ISL_12385783	2022-03-31	Royal Hobart Hospital	Royal Hobart Hospital	J Williamson et al
Australia/TAS001574/2022	EPI_ISL_12385786	2022-04-04	Royal Hobart Hospital	Royal Hobart Hospital	J Williamson et al
Australia/TAS001582/2022	EPI_ISL_12385794	2022-04-05	Royal Hobart Hospital	Royal Hobart Hospital	J Williamson et al
Australia/TAS001637/2022	EPI_ISL_12385849	2022-04-10	Royal Hobart Hospital	Royal Hobart Hospital	J Williamson et al
Australia/TAS001709/2022	EPI_ISL_12385918	2022-04-05	Royal Hobart Hospital	Royal Hobart Hospital	J Williamson et al
Australia/VIC28520/2021	EPI_ISL_7770410	2021-12-01	Microbiological Diagnostic Unit - Public Health Laboratory (MDU-PHL)	Microbiological Diagnostic Unit - Public Health Laboratory (MDU-PHL)	Seemann et al
Australia/VIC28585/2021	EPI_ISL_7771171	2021-12-02	Microbiological Diagnostic Unit - Public Health Laboratory (MDU-PHL)	Microbiological Diagnostic Unit - Public Health Laboratory (MDU-PHL)	Seemann et al
Australia/VIC29841/2021	EPI_ISL_8640790	2021-12-16	Microbiological Diagnostic Unit - Public Health Laboratory (MDU-PHL)	Microbiological Diagnostic Unit - Public Health Laboratory (MDU-PHL)	Seemann et al
Australia/VIC29892/2021	EPI_ISL_8640366	2021-12-14	Microbiological Diagnostic Unit - Public Health Laboratory (MDU-PHL)	Microbiological Diagnostic Unit - Public Health Laboratory (MDU-PHL)	Seemann et al
Australia/VIC29902/2021	EPI_ISL_8640390	2021-12-14	Microbiological Diagnostic Unit - Public Health Laboratory (MDU-PHL)	Microbiological Diagnostic Unit - Public Health Laboratory (MDU-PHL)	Seemann et al
Australia/VIC29906/2021	EPI_ISL_8640393	2021-12-15	Microbiological Diagnostic Unit - Public Health Laboratory (MDU-PHL)	Microbiological Diagnostic Unit - Public Health Laboratory (MDU-PHL)	Seemann et al
Australia/VIC30272/2021	EPI_ISL_8640952	2021-12-18	Microbiological Diagnostic Unit - Public Health Laboratory (MDU-PHL)	Microbiological Diagnostic Unit - Public Health Laboratory (MDU-PHL)	Seemann et al
Australia/VIC30464/2021	EPI_ISL_8640945	2021-12-18	Microbiological Diagnostic Unit - Public Health Laboratory (MDU-PHL)	Microbiological Diagnostic Unit - Public Health Laboratory (MDU-PHL)	Seemann et al
Australia/VIC30466/2021	EPI_ISL_8640953	2021-12-18	Microbiological Diagnostic Unit - Public Health Laboratory (MDU-PHL)	Microbiological Diagnostic Unit - Public Health Laboratory (MDU-PHL)	Seemann et al
Australia/VIC30502/2021	EPI_ISL_8641032	2021-12-18	Microbiological Diagnostic Unit - Public Health Laboratory (MDU-PHL)	Microbiological Diagnostic Unit - Public Health Laboratory (MDU-PHL)	Seemann et al
Australia/VIC30676/2021	EPI_ISL_8640499	2021-12-14	Microbiological Diagnostic Unit - Public Health Laboratory (MDU-PHL)	Microbiological Diagnostic Unit - Public Health Laboratory (MDU-PHL)	Seemann et al
Australia/VIC30695/2021	EPI_ISL_8641942	2021-12-21	Microbiological Diagnostic Unit - Public Health Laboratory (MDU-PHL)	Microbiological Diagnostic Unit - Public Health Laboratory (MDU-PHL)	Seemann et al
Australia/VIC30996/2021	EPI_ISL_8642181	2021-12-23	Microbiological Diagnostic Unit - Public Health Laboratory (MDU-PHL)	Microbiological Diagnostic Unit - Public Health Laboratory (MDU-PHL)	Seemann et al
Australia/VIC30998/2021	EPI_ISL_8642182	2021-12-24	Microbiological Diagnostic Unit - Public Health Laboratory (MDU-PHL)	Microbiological Diagnostic Unit - Public Health Laboratory (MDU-PHL)	Seemann et al
Australia/VIC31763/2021	EPI_ISL_8641234	2021-12-17	Microbiological Diagnostic Unit - Public Health Laboratory (MDU-PHL)	Microbiological Diagnostic Unit - Public Health Laboratory (MDU-PHL)	Seemann et al
Australia/VIC31883/2021	EPI_ISL_8642155	2021-12-22	Microbiological Diagnostic Unit - Public Health Laboratory (MDU-PHL)	Microbiological Diagnostic Unit - Public Health Laboratory (MDU-PHL)	Seemann et al
Australia/VIC32186/2021	EPI_ISL_8643256	2021-12-26	Microbiological Diagnostic Unit - Public Health Laboratory (MDU-PHL)	Microbiological Diagnostic Unit - Public Health Laboratory (MDU-PHL)	Seemann et al
Australia/VIC32187/2021	EPI_ISL_8643257	2021-12-25	Microbiological Diagnostic Unit - Public Health Laboratory (MDU-PHL)	Microbiological Diagnostic Unit - Public Health Laboratory (MDU-PHL)	Seemann et al
Australia/VIC32188/2021	EPI_ISL_8643258	2021-12-26	Microbiological Diagnostic Unit - Public Health Laboratory (MDU-PHL)	Microbiological Diagnostic Unit - Public Health Laboratory (MDU-PHL)	Seemann et al
Australia/VIC32380/2021	EPI_ISL_8642486	2021-12-22	Microbiological Diagnostic Unit - Public Health Laboratory (MDU-PHL)	Microbiological Diagnostic Unit - Public Health Laboratory (MDU-PHL)	Seemann et al
Australia/VIC33403/2021	EPI_ISL_8643121	2021-12-25	Microbiological Diagnostic Unit - Public Health Laboratory (MDU-PHL)	Microbiological Diagnostic Unit - Public Health Laboratory (MDU-PHL)	Seemann et al
Australia/VIC33650/2021	EPI_ISL_8645926	2021-12-29	Microbiological Diagnostic Unit - Public Health Laboratory (MDU-PHL)	Microbiological Diagnostic Unit - Public Health Laboratory (MDU-PHL)	Seemann et al
Australia/VIC33846/2022	EPI_ISL_8646223	2022-01-01	Microbiological Diagnostic Unit - Public Health Laboratory (MDU-PHL)	Microbiological Diagnostic Unit - Public Health Laboratory (MDU-PHL)	Seemann et al
Australia/VIC33861/2022	EPI_ISL_8646236	2022-01-01	Microbiological Diagnostic Unit - Public Health Laboratory (MDU-PHL)	Microbiological Diagnostic Unit - Public Health Laboratory (MDU-PHL)	Seemann et al
Australia/VIC33889/2022	EPI_ISL_8646282	2022-01-02	Microbiological Diagnostic Unit - Public Health Laboratory (MDU-PHL)	Microbiological Diagnostic Unit - Public Health Laboratory (MDU-PHL)	Seemann et al
Australia/VIC34088/2021	EPI_ISL_8645937	2021-12-30	Microbiological Diagnostic Unit - Public Health Laboratory (MDU-PHL)	Microbiological Diagnostic Unit - Public Health Laboratory (MDU-PHL)	Seemann et al
Australia/VIC34100/2021	EPI_ISL_8645942	2021-12-29	Microbiological Diagnostic Unit - Public Health Laboratory (MDU-PHL)	Microbiological Diagnostic Unit - Public Health Laboratory (MDU-PHL)	Seemann et al
Australia/VIC34200/2022	EPI_ISL_8646341	2022-01-03	Microbiological Diagnostic Unit - Public Health Laboratory (MDU-PHL)	Microbiological Diagnostic Unit - Public Health Laboratory (MDU-PHL)	Seemann et al
Australia/VIC34289/2022	EPI_ISL_8646275	2022-01-02	Microbiological Diagnostic Unit - Public Health Laboratory (MDU-PHL)	Microbiological Diagnostic Unit - Public Health Laboratory (MDU-PHL)	Seemann et al
Australia/VIC34452/2022	EPI_ISL_8954790	2022-01-03	Microbiological Diagnostic Unit - Public Health Laboratory (MDU-PHL)	Microbiological Diagnostic Unit - Public Health Laboratory (MDU-PHL)	Seemann et al
Australia/VIC34904/2022	EPI_ISL_8954886	2022-01-06	Microbiological Diagnostic Unit - Public Health Laboratory (MDU-PHL)	Microbiological Diagnostic Unit - Public Health Laboratory (MDU-PHL)	Seemann et al
Australia/VIC34931/2022	EPI_ISL_8954851	2022-01-02	Microbiological Diagnostic Unit - Public Health Laboratory (MDU-PHL)	Microbiological Diagnostic Unit - Public Health Laboratory (MDU-PHL)	Seemann et al
Australia/VIC34935/2022	EPI_ISL_8954854	2022-01-02	Microbiological Diagnostic Unit - Public Health Laboratory (MDU-PHL)	Microbiological Diagnostic Unit - Public Health Laboratory (MDU-PHL)	Seemann et al
Australia/VIC34982/2022	EPI_ISL_8954860	2022-01-02	Microbiological Diagnostic Unit - Public Health Laboratory (MDU-PHL)	Microbiological Diagnostic Unit - Public Health Laboratory (MDU-PHL)	Seemann et al
Australia/VIC35025/2021	EPI_ISL_8954515	2021-12-30	Microbiological Diagnostic Unit - Public Health Laboratory (MDU-PHL)	Microbiological Diagnostic Unit - Public Health Laboratory (MDU-PHL)	Seemann et al
Australia/VIC35026/2021	EPI_ISL_8954516	2021-12-30	Microbiological Diagnostic Unit - Public Health Laboratory (MDU-PHL)	Microbiological Diagnostic Unit - Public Health Laboratory (MDU-PHL)	Seemann et al
Australia/VIC35027/2021	EPI_ISL_8954517	2021-12-30	Microbiological Diagnostic Unit - Public Health Laboratory (MDU-PHL)	Microbiological Diagnostic Unit - Public Health Laboratory (MDU-PHL)	Seemann et al
Australia/VIC35030/2021	EPI_ISL_8954520	2021-12-30	Microbiological Diagnostic Unit - Public Health Laboratory (MDU-PHL)	Microbiological Diagnostic Unit - Public Health Laboratory (MDU-PHL)	Seemann et al
Australia/VIC35115/2022	EPI_ISL_8955225	2022-01-04	Microbiological Diagnostic Unit - Public Health Laboratory (MDU-PHL)	Microbiological Diagnostic Unit - Public Health Laboratory (MDU-PHL)	Seemann et al
Australia/VIC35119/2022	EPI_ISL_8955229	2022-01-04	Microbiological Diagnostic Unit - Public Health Laboratory (MDU-PHL)	Microbiological Diagnostic Unit - Public Health Laboratory (MDU-PHL)	Seemann et al
Australia/VIC35330/2022	EPI_ISL_8955371	2022-01-04	Microbiological Diagnostic Unit - Public Health Laboratory (MDU-PHL)	Microbiological Diagnostic Unit - Public Health Laboratory (MDU-PHL)	Seemann et al
Australia/VIC35647/2022	EPI_ISL_8955459	2022-01-14	Microbiological Diagnostic Unit - Public Health Laboratory (MDU-PHL)	Microbiological Diagnostic Unit - Public Health Laboratory (MDU-PHL)	Seemann et al
Australia/VIC35727/2022	EPI_ISL_8955558	2022-01-06	Microbiological Diagnostic Unit - Public Health Laboratory (MDU-PHL)	Microbiological Diagnostic Unit - Public Health Laboratory (MDU-PHL)	Seemann et al
Australia/VIC35823/2022	EPI_ISL_8955111	2022-01-13	Microbiological Diagnostic Unit - Public Health Laboratory (MDU-PHL)	Microbiological Diagnostic Unit - Public Health Laboratory (MDU-PHL)	Seemann et al
Australia/VIC35854/2022	EPI_ISL_8955530	2022-01-15	Microbiological Diagnostic Unit - Public Health Laboratory (MDU-PHL)	Microbiological Diagnostic Unit - Public Health Laboratory (MDU-PHL)	Seemann et al
Australia/VIC35885/2022	EPI_ISL_8955586	2022-01-03	Microbiological Diagnostic Unit - Public Health Laboratory (MDU-PHL)	Microbiological Diagnostic Unit - Public Health Laboratory (MDU-PHL)	Seemann et al
Australia/VIC35956/2022	EPI_ISL_8955660	2022-01-03	Microbiological Diagnostic Unit - Public Health Laboratory (MDU-PHL)	Microbiological Diagnostic Unit - Public Health Laboratory (MDU-PHL)	Seemann et al
Australia/VIC35969/2022	EPI_ISL_8955672	2022-01-04	Microbiological Diagnostic Unit - Public Health Laboratory (MDU-PHL)	Microbiological Diagnostic Unit - Public Health Laboratory (MDU-PHL)	Seemann et al
Australia/VIC36042/2022	EPI_ISL_8955735	2022-01-07	Microbiological Diagnostic Unit - Public Health Laboratory (MDU-PHL)	Microbiological Diagnostic Unit - Public Health Laboratory (MDU-PHL)	Seemann et al
Australia/VIC36067/2022	EPI_ISL_8955757	2022-01-16	Microbiological Diagnostic Unit - Public Health Laboratory (MDU-PHL)	Microbiological Diagnostic Unit - Public Health Laboratory (MDU-PHL)	Seemann et al
Australia/VIC36086/2022	EPI_ISL_8955764	2022-01-14	Microbiological Diagnostic Unit - Public Health Laboratory (MDU-PHL)	Microbiological Diagnostic Unit - Public Health Laboratory (MDU-PHL)	Seemann et al
Australia/VIC36146/2022	EPI_ISL_8955831	2022-01-03	Microbiological Diagnostic Unit - Public Health Laboratory (MDU-PHL)	Microbiological Diagnostic Unit - Public Health Laboratory (MDU-PHL)	Seemann et al
Australia/VIC36407/2022	EPI_ISL_8955976	2022-01-01	Microbiological Diagnostic Unit - Public Health Laboratory (MDU-PHL)	Microbiological Diagnostic Unit - Public Health Laboratory (MDU-PHL)	Seemann et al
Australia/VIC36531/2022	EPI_ISL_9302115	2022-01-06	Microbiological Diagnostic Unit - Public Health Laboratory (MDU-PHL)	Microbiological Diagnostic Unit - Public Health Laboratory (MDU-PHL)	Seemann et al
Australia/VIC36615/2022	EPI_ISL_9302513	2022-01-03	Microbiological Diagnostic Unit - Public Health Laboratory (MDU-PHL)	Microbiological Diagnostic Unit - Public Health Laboratory (MDU-PHL)	Seemann et al
Australia/VIC36779/2022	EPI_ISL_9302336	2022-01-09	Microbiological Diagnostic Unit - Public Health Laboratory (MDU-PHL)	Microbiological Diagnostic Unit - Public Health Laboratory (MDU-PHL)	Seemann et al
Australia/VIC37095/2022	EPI_ISL_9302599	2022-01-15	Microbiological Diagnostic Unit - Public Health Laboratory (MDU-PHL)	Microbiological Diagnostic Unit - Public Health Laboratory (MDU-PHL)	Seemann et al
Australia/VIC37144/2022	EPI_ISL_9302633	2022-01-13	Microbiological Diagnostic Unit - Public Health Laboratory (MDU-PHL)	Microbiological Diagnostic Unit - Public Health Laboratory (MDU-PHL)	Seemann et al
Australia/VIC37202/2022	EPI_ISL_9302668	2022-01-21	Microbiological Diagnostic Unit - Public Health Laboratory (MDU-PHL)	Microbiological Diagnostic Unit - Public Health Laboratory (MDU-PHL)	Seemann et al
Australia/VIC37237/2022	EPI_ISL_9302718	2022-01-04	Microbiological Diagnostic Unit - Public Health Laboratory (MDU-PHL)	Microbiological Diagnostic Unit - Public Health Laboratory (MDU-PHL)	Seemann et al
Australia/VIC37239/2022	EPI_ISL_9302720	2022-01-01	Microbiological Diagnostic Unit - Public Health Laboratory (MDU-PHL)	Microbiological Diagnostic Unit - Public Health Laboratory (MDU-PHL)	Seemann et al
Australia/VIC37356/2022	EPI_ISL_9302405	2022-01-11	Microbiological Diagnostic Unit - Public Health Laboratory (MDU-PHL)	Microbiological Diagnostic Unit - Public Health Laboratory (MDU-PHL)	Seemann et al
Australia/VIC37378/2022	EPI_ISL_9302425	2022-01-11	Microbiological Diagnostic Unit - Public Health Laboratory (MDU-PHL)	Microbiological Diagnostic Unit - Public Health Laboratory (MDU-PHL)	Seemann et al
Australia/VIC37397/2022	EPI_ISL_9302438	2022-01-11	Microbiological Diagnostic Unit - Public Health Laboratory (MDU-PHL)	Microbiological Diagnostic Unit - Public Health Laboratory (MDU-PHL)	Seemann et al
Australia/VIC37436/2022	EPI_ISL_9302466	2022-01-11	Microbiological Diagnostic Unit - Public Health Laboratory (MDU-PHL)	Microbiological Diagnostic Unit - Public Health Laboratory (MDU-PHL)	Seemann et al
Australia/VIC37685/2022	EPI_ISL_9302774	2022-01-22	Microbiological Diagnostic Unit - Public Health Laboratory (MDU-PHL)	Microbiological Diagnostic Unit - Public Health Laboratory (MDU-PHL)	Seemann et al
Australia/VIC37694/2022	EPI_ISL_9302782	2022-01-17	Microbiological Diagnostic Unit - Public Health Laboratory (MDU-PHL)	Microbiological Diagnostic Unit - Public Health Laboratory (MDU-PHL)	Seemann et al
Australia/VIC37875/2022	EPI_ISL_9302845	2022-01-20	Microbiological Diagnostic Unit - Public Health Laboratory (MDU-PHL)	Microbiological Diagnostic Unit - Public Health Laboratory (MDU-PHL)	Seemann et al
Australia/VIC37878/2022	EPI_ISL_9302848	2022-01-20	Microbiological Diagnostic Unit - Public Health Laboratory (MDU-PHL)	Microbiological Diagnostic Unit - Public Health Laboratory (MDU-PHL)	Seemann et al
Australia/VIC37909/2022	EPI_ISL_9302863	2022-01-22	Microbiological Diagnostic Unit - Public Health Laboratory (MDU-PHL)	Microbiological Diagnostic Unit - Public Health Laboratory (MDU-PHL)	Seemann et al
Australia/VIC37924/2022	EPI_ISL_9302873	2022-01-24	Microbiological Diagnostic Unit - Public Health Laboratory (MDU-PHL)	Microbiological Diagnostic Unit - Public Health Laboratory (MDU-PHL)	Seemann et al
Australia/VIC37928/2022	EPI_ISL_9302874	2022-01-24	Microbiological Diagnostic Unit - Public Health Laboratory (MDU-PHL)	Microbiological Diagnostic Unit - Public Health Laboratory (MDU-PHL)	Seemann et al
Australia/VIC38110/2022	EPI_ISL_9303086	2022-01-19	Microbiological Diagnostic Unit - Public Health Laboratory (MDU-PHL)	Microbiological Diagnostic Unit - Public Health Laboratory (MDU-PHL)	Seemann et al
Australia/VIC38440/2022	EPI_ISL_9303220	2022-01-16	Microbiological Diagnostic Unit - Public Health Laboratory (MDU-PHL)	Microbiological Diagnostic Unit - Public Health Laboratory (MDU-PHL)	Seemann et al
Australia/VIC38565/2022	EPI_ISL_9767614	2022-01-15	Microbiological Diagnostic Unit - Public Health Laboratory (MDU-PHL)	Microbiological Diagnostic Unit - Public Health Laboratory (MDU-PHL)	Seemann et al
Australia/VIC38577/2022	EPI_ISL_9767622	2022-01-15	Microbiological Diagnostic Unit - Public Health Laboratory (MDU-PHL)	Microbiological Diagnostic Unit - Public Health Laboratory (MDU-PHL)	Seemann et al
Australia/VIC38601/2022	EPI_ISL_9767639	2022-01-15	Microbiological Diagnostic Unit - Public Health Laboratory (MDU-PHL)	Microbiological Diagnostic Unit - Public Health Laboratory (MDU-PHL)	Seemann et al
Australia/VIC38804/2022	EPI_ISL_9767947	2022-01-12	Microbiological Diagnostic Unit - Public Health Laboratory (MDU-PHL)	Microbiological Diagnostic Unit - Public Health Laboratory (MDU-PHL)	Seemann et al
Australia/VIC38817/2022	EPI_ISL_9767957	2022-01-12	Microbiological Diagnostic Unit - Public Health Laboratory (MDU-PHL)	Microbiological Diagnostic Unit - Public Health Laboratory (MDU-PHL)	Seemann et al
Australia/VIC40068/2022	EPI_ISL_9767552	2022-01-11	Microbiological Diagnostic Unit - Public Health Laboratory (MDU-PHL)	Microbiological Diagnostic Unit - Public Health Laboratory (MDU-PHL)	Seemann et al
Australia/VIC40105/2022	EPI_ISL_9767660	2022-01-23	Microbiological Diagnostic Unit - Public Health Laboratory (MDU-PHL)	Microbiological Diagnostic Unit - Public Health Laboratory (MDU-PHL)	Seemann et al
Australia/VIC43864/2022	EPI_ISL_10566127	2022-02-12	Microbiological Diagnostic Unit - Public Health Laboratory (MDU-PHL), The Peter Doherty Institute for Infection and Immunity	Microbiological Diagnostic Unit - Public Health Laboratory (MDU-PHL), The Peter Doherty Institute for Infection and Immunity	Seemann et al
Australia/VIC44003/2022	EPI_ISL_10566230	2022-02-21	Microbiological Diagnostic Unit - Public Health Laboratory (MDU-PHL), The Peter Doherty Institute for Infection and Immunity	Microbiological Diagnostic Unit - Public Health Laboratory (MDU-PHL), The Peter Doherty Institute for Infection and Immunity	Seemann et al
Australia/VIC44058/2022	EPI_ISL_11175675	2022-02-09	Microbiological Diagnostic Unit - Public Health Laboratory (MDU-PHL)	Microbiological Diagnostic Unit - Public Health Laboratory (MDU-PHL)	Seemann et al
Australia/VIC44065/2022	EPI_ISL_11175693	2022-03-15	Microbiological Diagnostic Unit - Public Health Laboratory (MDU-PHL)	Microbiological Diagnostic Unit - Public Health Laboratory (MDU-PHL)	Seemann et al
Australia/VIC44108/2022	EPI_ISL_11175758	2022-02-18	Microbiological Diagnostic Unit - Public Health Laboratory (MDU-PHL)	Microbiological Diagnostic Unit - Public Health Laboratory (MDU-PHL)	Seemann et al
Australia/VIC44363/2022	EPI_ISL_11176261	2022-02-19	Microbiological Diagnostic Unit - Public Health Laboratory (MDU-PHL)	Microbiological Diagnostic Unit - Public Health Laboratory (MDU-PHL)	Seemann et al
Australia/VIC44491/2022	EPI_ISL_11175887	2022-02-16	Microbiological Diagnostic Unit - Public Health Laboratory (MDU-PHL)	Microbiological Diagnostic Unit - Public Health Laboratory (MDU-PHL)	Seemann et al
Australia/VIC44497/2022	EPI_ISL_11175897	2022-02-16	Microbiological Diagnostic Unit - Public Health Laboratory (MDU-PHL)	Microbiological Diagnostic Unit - Public Health Laboratory (MDU-PHL)	Seemann et al
Australia/VIC44550/2022	EPI_ISL_11176274	2022-02-18	Microbiological Diagnostic Unit - Public Health Laboratory (MDU-PHL)	Microbiological Diagnostic Unit - Public Health Laboratory (MDU-PHL)	Seemann et al
Australia/VIC44743/2022	EPI_ISL_11176361	2022-02-24	Microbiological Diagnostic Unit - Public Health Laboratory (MDU-PHL)	Microbiological Diagnostic Unit - Public Health Laboratory (MDU-PHL)	Seemann et al
Australia/VIC44851/2022	EPI_ISL_11176474	2022-02-23	Microbiological Diagnostic Unit - Public Health Laboratory (MDU-PHL)	Microbiological Diagnostic Unit - Public Health Laboratory (MDU-PHL)	Seemann et al
Australia/VIC44860/2022	EPI_ISL_11176482	2022-02-27	Microbiological Diagnostic Unit - Public Health Laboratory (MDU-PHL)	Microbiological Diagnostic Unit - Public Health Laboratory (MDU-PHL)	Seemann et al
Australia/VIC44882/2022	EPI_ISL_11176503	2022-02-23	Microbiological Diagnostic Unit - Public Health Laboratory (MDU-PHL)	Microbiological Diagnostic Unit - Public Health Laboratory (MDU-PHL)	Seemann et al
Australia/VIC44913/2022	EPI_ISL_11176590	2022-02-25	Microbiological Diagnostic Unit - Public Health Laboratory (MDU-PHL)	Microbiological Diagnostic Unit - Public Health Laboratory (MDU-PHL)	Seemann et al
Australia/VIC44922/2022	EPI_ISL_11176599	2022-02-25	Microbiological Diagnostic Unit - Public Health Laboratory (MDU-PHL)	Microbiological Diagnostic Unit - Public Health Laboratory (MDU-PHL)	Seemann et al
Australia/VIC44923/2022	EPI_ISL_11176600	2022-02-25	Microbiological Diagnostic Unit - Public Health Laboratory (MDU-PHL)	Microbiological Diagnostic Unit - Public Health Laboratory (MDU-PHL)	Seemann et al
Australia/VIC44926/2022	EPI_ISL_11176603	2022-02-25	Microbiological Diagnostic Unit - Public Health Laboratory (MDU-PHL)	Microbiological Diagnostic Unit - Public Health Laboratory (MDU-PHL)	Seemann et al
Australia/VIC44931/2022	EPI_ISL_11176608	2022-02-25	Microbiological Diagnostic Unit - Public Health Laboratory (MDU-PHL)	Microbiological Diagnostic Unit - Public Health Laboratory (MDU-PHL)	Seemann et al
Australia/VIC44933/2022	EPI_ISL_11176610	2022-02-25	Microbiological Diagnostic Unit - Public Health Laboratory (MDU-PHL)	Microbiological Diagnostic Unit - Public Health Laboratory (MDU-PHL)	Seemann et al
Australia/VIC44941/2022	EPI_ISL_11176618	2022-02-24	Microbiological Diagnostic Unit - Public Health Laboratory (MDU-PHL)	Microbiological Diagnostic Unit - Public Health Laboratory (MDU-PHL)	Seemann et al
Australia/VIC45323/2022	EPI_ISL_11361952	2022-03-09	Microbiological Diagnostic Unit - Public Health Laboratory (MDU-PHL)	Microbiological Diagnostic Unit - Public Health Laboratory (MDU-PHL)	Seemann et al
Australia/VIC45439/2022	EPI_ISL_11361392	2022-03-01	Microbiological Diagnostic Unit - Public Health Laboratory (MDU-PHL)	Microbiological Diagnostic Unit - Public Health Laboratory (MDU-PHL)	Seemann et al
Australia/VIC45484/2022	EPI_ISL_11361435	2022-02-27	Microbiological Diagnostic Unit - Public Health Laboratory (MDU-PHL)	Microbiological Diagnostic Unit - Public Health Laboratory (MDU-PHL)	Seemann et al
Australia/VIC45494/2022	EPI_ISL_11361445	2022-03-01	Microbiological Diagnostic Unit - Public Health Laboratory (MDU-PHL)	Microbiological Diagnostic Unit - Public Health Laboratory (MDU-PHL)	Seemann et al
Australia/VIC45652/2022	EPI_ISL_11361668	2022-03-03	Microbiological Diagnostic Unit - Public Health Laboratory (MDU-PHL)	Microbiological Diagnostic Unit - Public Health Laboratory (MDU-PHL)	Seemann et al
Australia/VIC45698/2022	EPI_ISL_11362048	2022-03-08	Microbiological Diagnostic Unit - Public Health Laboratory (MDU-PHL)	Microbiological Diagnostic Unit - Public Health Laboratory (MDU-PHL)	Seemann et al
Australia/VIC45814/2022	EPI_ISL_11361732	2022-03-03	Microbiological Diagnostic Unit - Public Health Laboratory (MDU-PHL)	Microbiological Diagnostic Unit - Public Health Laboratory (MDU-PHL)	Seemann et al
Australia/VIC45837/2022	EPI_ISL_11361757	2022-03-07	Microbiological Diagnostic Unit - Public Health Laboratory (MDU-PHL)	Microbiological Diagnostic Unit - Public Health Laboratory (MDU-PHL)	Seemann et al
Australia/VIC45903/2022	EPI_ISL_11361827	2022-03-03	Microbiological Diagnostic Unit - Public Health Laboratory (MDU-PHL)	Microbiological Diagnostic Unit - Public Health Laboratory (MDU-PHL)	Seemann et al
Australia/VIC45917/2022	EPI_ISL_11361883	2022-02-28	Microbiological Diagnostic Unit - Public Health Laboratory (MDU-PHL)	Microbiological Diagnostic Unit - Public Health Laboratory (MDU-PHL)	Seemann et al
Australia/VIC45919/2022	EPI_ISL_11361885	2022-03-01	Microbiological Diagnostic Unit - Public Health Laboratory (MDU-PHL)	Microbiological Diagnostic Unit - Public Health Laboratory (MDU-PHL)	Seemann et al
Australia/VIC46090/2022	EPI_ISL_11361522	2022-03-02	Microbiological Diagnostic Unit - Public Health Laboratory (MDU-PHL)	Microbiological Diagnostic Unit - Public Health Laboratory (MDU-PHL)	Seemann et al
Australia/VIC46107/2022	EPI_ISL_11361970	2022-03-09	Microbiological Diagnostic Unit - Public Health Laboratory (MDU-PHL)	Microbiological Diagnostic Unit - Public Health Laboratory (MDU-PHL)	Seemann et al
Australia/VIC46154/2022	EPI_ISL_11361265	2022-02-22	Microbiological Diagnostic Unit - Public Health Laboratory (MDU-PHL)	Microbiological Diagnostic Unit - Public Health Laboratory (MDU-PHL)	Seemann et al
Australia/VIC46199/2022	EPI_ISL_11361238	2022-02-23	Microbiological Diagnostic Unit - Public Health Laboratory (MDU-PHL)	Microbiological Diagnostic Unit - Public Health Laboratory (MDU-PHL)	Seemann et al
Australia/VIC46203/2022	EPI_ISL_11361242	2022-02-23	Microbiological Diagnostic Unit - Public Health Laboratory (MDU-PHL)	Microbiological Diagnostic Unit - Public Health Laboratory (MDU-PHL)	Seemann et al
Australia/VIC46217/2022	EPI_ISL_11361294	2022-02-22	Microbiological Diagnostic Unit - Public Health Laboratory (MDU-PHL)	Microbiological Diagnostic Unit - Public Health Laboratory (MDU-PHL)	Seemann et al
Australia/VIC46219/2022	EPI_ISL_11361296	2022-02-23	Microbiological Diagnostic Unit - Public Health Laboratory (MDU-PHL)	Microbiological Diagnostic Unit - Public Health Laboratory (MDU-PHL)	Seemann et al
Australia/VIC46586/2022	EPI_ISL_11629989	2022-02-27	Microbiological Diagnostic Unit - Public Health Laboratory (MDU-PHL)	Microbiological Diagnostic Unit - Public Health Laboratory (MDU-PHL)	Seemann et al
Australia/VIC46824/2022	EPI_ISL_11630227	2022-03-11	Microbiological Diagnostic Unit - Public Health Laboratory (MDU-PHL)	Microbiological Diagnostic Unit - Public Health Laboratory (MDU-PHL)	Seemann et al
Australia/VIC46832/2022	EPI_ISL_11630235	2022-03-12	Microbiological Diagnostic Unit - Public Health Laboratory (MDU-PHL)	Microbiological Diagnostic Unit - Public Health Laboratory (MDU-PHL)	Seemann et al
Australia/VIC47518/2022	EPI_ISL_11630948	2022-03-16	Microbiological Diagnostic Unit - Public Health Laboratory (MDU-PHL)	Microbiological Diagnostic Unit - Public Health Laboratory (MDU-PHL)	Seemann et al
Australia/VIC48219/2022	EPI_ISL_11631416	2022-03-18	Microbiological Diagnostic Unit - Public Health Laboratory (MDU-PHL)	Microbiological Diagnostic Unit - Public Health Laboratory (MDU-PHL)	Seemann et al
Australia/VIC48277/2022	EPI_ISL_12110315	2022-03-21	Microbiological Diagnostic Unit - Public Health Laboratory (MDU-PHL)	Microbiological Diagnostic Unit - Public Health Laboratory (MDU-PHL)	Seemann et al
Australia/VIC48939/2022	EPI_ISL_12110769	2022-03-20	Microbiological Diagnostic Unit - Public Health Laboratory (MDU-PHL)	Microbiological Diagnostic Unit - Public Health Laboratory (MDU-PHL)	Seemann et al
Australia/VIC49444/2022	EPI_ISL_12110289	2022-03-09	Microbiological Diagnostic Unit - Public Health Laboratory (MDU-PHL)	Microbiological Diagnostic Unit - Public Health Laboratory (MDU-PHL)	Seemann et al
Australia/VIC50024/2022	EPI_ISL_12110963	2022-03-23	Microbiological Diagnostic Unit - Public Health Laboratory (MDU-PHL)	Microbiological Diagnostic Unit - Public Health Laboratory (MDU-PHL)	Seemann et al
Australia/VIC50781/2022	EPI_ISL_12114689	2022-03-28	Microbiological Diagnostic Unit - Public Health Laboratory (MDU-PHL)	Microbiological Diagnostic Unit - Public Health Laboratory (MDU-PHL)	Seemann et al
Australia/VIC50842/2022	EPI_ISL_12114871	2022-03-31	Microbiological Diagnostic Unit - Public Health Laboratory (MDU-PHL)	Microbiological Diagnostic Unit - Public Health Laboratory (MDU-PHL)	Seemann et al
Australia/VIC51010/2022	EPI_ISL_12115389	2022-04-03	Microbiological Diagnostic Unit - Public Health Laboratory (MDU-PHL)	Microbiological Diagnostic Unit - Public Health Laboratory (MDU-PHL)	Seemann et al
Australia/VIC51260/2022	EPI_ISL_12275695	2022-03-22	Microbiological Diagnostic Unit - Public Health Laboratory (MDU-PHL)	Microbiological Diagnostic Unit - Public Health Laboratory (MDU-PHL)	Seemann et al
Australia/VIC51361/2022	EPI_ISL_12275790	2022-03-24	Microbiological Diagnostic Unit - Public Health Laboratory (MDU-PHL)	Microbiological Diagnostic Unit - Public Health Laboratory (MDU-PHL)	Seemann et al
Australia/VIC51401/2022	EPI_ISL_12275830	2022-03-23	Microbiological Diagnostic Unit - Public Health Laboratory (MDU-PHL)	Microbiological Diagnostic Unit - Public Health Laboratory (MDU-PHL)	Seemann et al
Australia/VIC51499/2022	EPI_ISL_12276542	2022-04-02	Microbiological Diagnostic Unit - Public Health Laboratory (MDU-PHL), The Peter Doherty Institute for Infection and Immunity	Microbiological Diagnostic Unit - Public Health Laboratory (MDU-PHL), The Peter Doherty Institute for Infection and Immunity	Seemann et al
Australia/VIC52098/2022	EPI_ISL_12276043	2022-03-31	Microbiological Diagnostic Unit - Public Health Laboratory (MDU-PHL)	Microbiological Diagnostic Unit - Public Health Laboratory (MDU-PHL)	Seemann et al
Australia/VIC52118/2022	EPI_ISL_12276073	2022-03-28	Microbiological Diagnostic Unit - Public Health Laboratory (MDU-PHL), The Peter Doherty Institute for Infection and Immunity	Microbiological Diagnostic Unit - Public Health Laboratory (MDU-PHL), The Peter Doherty Institute for Infection and Immunity	Seemann et al
Australia/VIC54376/2022	EPI_ISL_12848590	2022-04-26	Microbiological Diagnostic Unit - Public Health Laboratory (MDU-PHL), The Peter Doherty Institute for Infection and Immunity	Microbiological Diagnostic Unit - Public Health Laboratory (MDU-PHL), The Peter Doherty Institute for Infection and Immunity	Seemann et al
Australia/VIC54822/2022	EPI_ISL_12847340	2022-04-15	Microbiological Diagnostic Unit - Public Health Laboratory (MDU-PHL), The Peter Dorothy Institute for Infection and Immunity	Microbiological Diagnostic Unit - Public Health Laboratory (MDU-PHL), The Peter Dorothy Institute for Infection and Immunity	Seemann et al
Australia/VIC56059/2022	EPI_ISL_12848494	2022-04-25	Microbiological Diagnostic Unit - Public Health Laboratory (MDU-PHL), The Peter Doherty Institute for Infection and Immunity	Microbiological Diagnostic Unit - Public Health Laboratory (MDU-PHL), The Peter Doherty Institute for Infection and Immunity	Seemann et al
Australia/VIC57288/2022	EPI_ISL_12850277	2022-05-02	Microbiological Diagnostic Unit - Public Health Laboratory (MDU-PHL), The Peter Dororthy Institute for Infection and Immunity	Microbiological Diagnostic Unit - Public Health Laboratory (MDU-PHL), The Peter Dororthy Institute for Infection and Immunity	Seemann et al
Australia/WA1055/2022	EPI_ISL_9163968	2022-01-23	PathWest Laboratory Medicine WA	PathWest Laboratory Medicine WA Microbial Surveillance Unit	PathWest Laboratory Medicine WA Microbial Surveillance Unit et al
Australia/WA1058/2022	EPI_ISL_9163971	2022-01-24	PathWest Laboratory Medicine WA	PathWest Laboratory Medicine WA Microbial Surveillance Unit	PathWest Laboratory Medicine WA Microbial Surveillance Unit et al
Australia/WA1065/2022	EPI_ISL_9163978	2022-01-24	PathWest Laboratory Medicine WA	PathWest Laboratory Medicine WA Microbial Surveillance Unit	PathWest Laboratory Medicine WA Microbial Surveillance Unit et al
Australia/WA1067/2022	EPI_ISL_9163980	2022-01-24	PathWest Laboratory Medicine WA	PathWest Laboratory Medicine WA Microbial Surveillance Unit	PathWest Laboratory Medicine WA Microbial Surveillance Unit et al
Australia/WA1114/2022	EPI_ISL_9325050	2022-01-22	PathWest Laboratory Medicine WA	PathWest Laboratory Medicine WA Microbial Surveillance Unit	PathWest Laboratory Medicine WA Microbial Surveillance Unit et al
Australia/WA1115/2022	EPI_ISL_9325051	2022-01-22	PathWest Laboratory Medicine WA	PathWest Laboratory Medicine WA Microbial Surveillance Unit	PathWest Laboratory Medicine WA Microbial Surveillance Unit et al
Australia/WA1118/2022	EPI_ISL_9325054	2022-01-22	PathWest Laboratory Medicine WA	PathWest Laboratory Medicine WA Microbial Surveillance Unit	PathWest Laboratory Medicine WA Microbial Surveillance Unit et al
Australia/WA1119/2022	EPI_ISL_9325055	2022-01-22	PathWest Laboratory Medicine WA	PathWest Laboratory Medicine WA Microbial Surveillance Unit	PathWest Laboratory Medicine WA Microbial Surveillance Unit et al
Australia/WA1126/2022	EPI_ISL_9325062	2022-01-23	PathWest Laboratory Medicine WA	PathWest Laboratory Medicine WA Microbial Surveillance Unit	PathWest Laboratory Medicine WA Microbial Surveillance Unit et al
Australia/WA1127/2022	EPI_ISL_9325063	2022-01-22	PathWest Laboratory Medicine WA	PathWest Laboratory Medicine WA Microbial Surveillance Unit	PathWest Laboratory Medicine WA Microbial Surveillance Unit et al
Australia/WA1129/2022	EPI_ISL_9325065	2022-01-23	PathWest Laboratory Medicine WA	PathWest Laboratory Medicine WA Microbial Surveillance Unit	PathWest Laboratory Medicine WA Microbial Surveillance Unit et al
Australia/WA1130/2022	EPI_ISL_9325066	2022-01-23	PathWest Laboratory Medicine WA	PathWest Laboratory Medicine WA Microbial Surveillance Unit	PathWest Laboratory Medicine WA Microbial Surveillance Unit et al
Australia/WA1131/2022	EPI_ISL_9325067	2022-01-22	PathWest Laboratory Medicine WA	PathWest Laboratory Medicine WA Microbial Surveillance Unit	PathWest Laboratory Medicine WA Microbial Surveillance Unit et al
Australia/WA1136/2022	EPI_ISL_9325072	2022-01-24	PathWest Laboratory Medicine WA	PathWest Laboratory Medicine WA Microbial Surveillance Unit	PathWest Laboratory Medicine WA Microbial Surveillance Unit et al
Australia/WA1137/2022	EPI_ISL_9325073	2022-01-24	PathWest Laboratory Medicine WA	PathWest Laboratory Medicine WA Microbial Surveillance Unit	PathWest Laboratory Medicine WA Microbial Surveillance Unit et al
Australia/WA1140/2022	EPI_ISL_9325076	2022-01-24	PathWest Laboratory Medicine WA	PathWest Laboratory Medicine WA Microbial Surveillance Unit	PathWest Laboratory Medicine WA Microbial Surveillance Unit et al
Australia/WA1141/2022	EPI_ISL_9325077	2022-01-24	PathWest Laboratory Medicine WA	PathWest Laboratory Medicine WA Microbial Surveillance Unit	PathWest Laboratory Medicine WA Microbial Surveillance Unit et al
Australia/WA1159/2022	EPI_ISL_9595677	2022-01-27	PathWest Laboratory Medicine WA	PathWest Laboratory Medicine WA Microbial Surveillance Unit	PathWest Laboratory Medicine WA Microbial Surveillance Unit et al
Australia/WA1196/2022	EPI_ISL_9595714	2022-01-29	PathWest Laboratory Medicine WA	PathWest Laboratory Medicine WA Microbial Surveillance Unit	PathWest Laboratory Medicine WA Microbial Surveillance Unit et al
Australia/WA1212/2022	EPI_ISL_9595730	2022-01-29	PathWest Laboratory Medicine WA	PathWest Laboratory Medicine WA Microbial Surveillance Unit	PathWest Laboratory Medicine WA Microbial Surveillance Unit et al
Australia/WA1234/2022	EPI_ISL_9595752	2022-01-31	PathWest Laboratory Medicine WA	PathWest Laboratory Medicine WA Microbial Surveillance Unit	PathWest Laboratory Medicine WA Microbial Surveillance Unit et al
Australia/WA1237/2022	EPI_ISL_9595755	2022-01-30	PathWest Laboratory Medicine WA	PathWest Laboratory Medicine WA Microbial Surveillance Unit	PathWest Laboratory Medicine WA Microbial Surveillance Unit et al
Australia/WA1257/2022	EPI_ISL_9595775	2022-02-01	PathWest Laboratory Medicine WA	PathWest Laboratory Medicine WA Microbial Surveillance Unit	PathWest Laboratory Medicine WA Microbial Surveillance Unit et al
Australia/WA1258/2022	EPI_ISL_9595776	2022-01-31	PathWest Laboratory Medicine WA	PathWest Laboratory Medicine WA Microbial Surveillance Unit	PathWest Laboratory Medicine WA Microbial Surveillance Unit et al
Australia/WA1273/2022	EPI_ISL_9595791	2022-02-01	PathWest Laboratory Medicine WA	PathWest Laboratory Medicine WA Microbial Surveillance Unit	PathWest Laboratory Medicine WA Microbial Surveillance Unit et al
Australia/WA1289/2022	EPI_ISL_9595807	2022-02-03	PathWest Laboratory Medicine WA	PathWest Laboratory Medicine WA Microbial Surveillance Unit	PathWest Laboratory Medicine WA Microbial Surveillance Unit et al
Australia/WA1294/2022	EPI_ISL_9750636	2022-02-02	PathWest Laboratory Medicine WA	PathWest Laboratory Medicine WA Microbial Surveillance Unit	PathWest Laboratory Medicine WA Microbial Surveillance Unit et al
Australia/WA1296/2022	EPI_ISL_9750638	2022-02-03	PathWest Laboratory Medicine WA	PathWest Laboratory Medicine WA Microbial Surveillance Unit	PathWest Laboratory Medicine WA Microbial Surveillance Unit et al
Australia/WA1310/2022	EPI_ISL_9750652	2022-02-04	PathWest Laboratory Medicine WA	PathWest Laboratory Medicine WA Microbial Surveillance Unit	PathWest Laboratory Medicine WA Microbial Surveillance Unit et al
Australia/WA1312/2022	EPI_ISL_9750654	2022-02-04	PathWest Laboratory Medicine WA	PathWest Laboratory Medicine WA Microbial Surveillance Unit	PathWest Laboratory Medicine WA Microbial Surveillance Unit et al
Australia/WA1321/2022	EPI_ISL_9750663	2022-02-03	PathWest Laboratory Medicine WA	PathWest Laboratory Medicine WA Microbial Surveillance Unit	PathWest Laboratory Medicine WA Microbial Surveillance Unit et al
Australia/WA1323/2022	EPI_ISL_9750665	2022-01-31	PathWest Laboratory Medicine WA	PathWest Laboratory Medicine WA Microbial Surveillance Unit	PathWest Laboratory Medicine WA Microbial Surveillance Unit et al
Australia/WA1325/2022	EPI_ISL_9750666	2022-01-30	PathWest Laboratory Medicine WA	PathWest Laboratory Medicine WA Microbial Surveillance Unit	PathWest Laboratory Medicine WA Microbial Surveillance Unit et al
Australia/WA1344/2022	EPI_ISL_9750682	2022-02-05	PathWest Laboratory Medicine WA	PathWest Laboratory Medicine WA Microbial Surveillance Unit	PathWest Laboratory Medicine WA Microbial Surveillance Unit et al
Australia/WA1348/2022	EPI_ISL_9750686	2022-02-05	PathWest Laboratory Medicine WA	PathWest Laboratory Medicine WA Microbial Surveillance Unit	PathWest Laboratory Medicine WA Microbial Surveillance Unit et al
Australia/WA1363/2022	EPI_ISL_9854375	2022-02-07	PathWest Laboratory Medicine WA	PathWest Laboratory Medicine WA Microbial Surveillance Unit	PathWest Laboratory Medicine WA Microbial Surveillance Unit et al
Australia/WA1371/2022	EPI_ISL_9854381	2022-02-07	PathWest Laboratory Medicine WA	PathWest Laboratory Medicine WA Microbial Surveillance Unit	PathWest Laboratory Medicine WA Microbial Surveillance Unit et al
Australia/WA1385/2022	EPI_ISL_9966208	2022-02-09	PathWest Laboratory Medicine WA	PathWest Laboratory Medicine WA Microbial Surveillance Unit	PathWest Laboratory Medicine WA Microbial Surveillance Unit et al
Australia/WA1392/2022	EPI_ISL_9966198	2022-02-10	PathWest Laboratory Medicine WA	PathWest Laboratory Medicine WA Microbial Surveillance Unit	PathWest Laboratory Medicine WA Microbial Surveillance Unit et al
Australia/WA1396/2022	EPI_ISL_9966210	2022-02-11	PathWest Laboratory Medicine WA	PathWest Laboratory Medicine WA Microbial Surveillance Unit	PathWest Laboratory Medicine WA Microbial Surveillance Unit et al
Australia/WA1403/2022	EPI_ISL_9966200	2022-02-13	PathWest Laboratory Medicine WA	PathWest Laboratory Medicine WA Microbial Surveillance Unit	PathWest Laboratory Medicine WA Microbial Surveillance Unit et al
Australia/WA1427/2022	EPI_ISL_10065044	2022-02-15	PathWest Laboratory Medicine WA	PathWest Laboratory Medicine WA Microbial Surveillance Unit	PathWest Laboratory Medicine WA Microbial Surveillance Unit et al
Australia/WA1430/2022	EPI_ISL_10115960	2022-02-15	PathWest Nedlands	PathWest Nedlands, Microbial Surveillance Unit	PathWest Laboratory Medicine WA Microbial Surveillance Unit et al
Australia/WA1496/2022	EPI_ISL_10348686	2022-02-21	PathWest Laboratory Medicine WA	PathWest Laboratory Medicine WA Microbial Surveillance Unit	PathWest Laboratory Medicine WA Microbial Surveillance Unit et al
Australia/WA1616/2022	EPI_ISL_10675309	2022-02-24	PathWest Laboratory Medicine WA	PathWest Laboratory Medicine WA Microbial Surveillance Unit	PathWest Laboratory Medicine WA Microbial Surveillance Unit et al
Australia/WA1962/2022	EPI_ISL_11111753	2022-03-09	PathWest Laboratory Medicine WA	PathWest Laboratory Medicine WA Microbial Surveillance Unit	PathWest Laboratory Medicine WA Microbial Surveillance Unit et al
Australia/WA2003/2022	EPI_ISL_11111765	2022-03-10	PathWest Laboratory Medicine WA	PathWest Laboratory Medicine WA Microbial Surveillance Unit	PathWest Laboratory Medicine WA Microbial Surveillance Unit et al
Australia/WA2009/2022	EPI_ISL_11111766	2022-03-10	PathWest Laboratory Medicine WA	PathWest Laboratory Medicine WA Microbial Surveillance Unit	PathWest Laboratory Medicine WA Microbial Surveillance Unit et al
Australia/WA2650/2022	EPI_ISL_11866675	2022-04-04	PathWest Laboratory Medicine WA	PathWest Laboratory Medicine WA Microbial Surveillance Unit	PathWest Laboratory Medicine WA Microbial Surveillance Unit et al
Australia/WA2883/2022	EPI_ISL_12205734	2022-04-11	PathWest Laboratory Medicine WA	PathWest Laboratory Medicine WA Microbial Surveillance Unit	PathWest Laboratory Medicine WA Microbial Surveillance Unit et al
Australia/WA3249/2022	EPI_ISL_12533533	2022-04-26	PathWest Laboratory Medicine WA	PathWest Laboratory Medicine WA Microbial Surveillance Unit	PathWest Laboratory Medicine WA Microbial Surveillance Unit et al
Australia/WA839/2021	EPI_ISL_7951627	2021-12-19	PathWest Laboratory Medicine WA	PathWest Laboratory Medicine WA Microbial Surveillance Unit	PathWest Laboratory Medicine WA Microbial Surveillance Unit et al
Australia/WA845/2021	EPI_ISL_8038551	2021-12-21	PathWest Laboratory Medicine WA	PathWest Laboratory Medicine WA	PathWest Laboratory Medicine WA Microbial Surveillance Unit et al
Australia/WA846/2021	EPI_ISL_8038552	2021-12-22	PathWest Laboratory Medicine WA	PathWest Laboratory Medicine WA	PathWest Laboratory Medicine WA Microbial Surveillance Unit et al
Australia/WA868/2021	EPI_ISL_8295617	2021-12-29	PathWest Laboratory Medicine WA	PathWest Laboratory Medicine WA Microbial Surveillance Unit	PathWest Laboratory Medicine WA Microbial Surveillance Unit et al
Australia/WA925/2022	EPI_ISL_8801076	2022-01-05	PathWest Laboratory Medicine WA	PathWest Laboratory Medicine WA Microbial Surveillance Unit	PathWest Laboratory Medicine WA Microbial Surveillance Unit et al
Australia/WA959/2022	EPI_ISL_8859266	2022-01-11	PathWest Laboratory Medicine WA	PathWest Laboratory Medicine WA Microbial Surveillance Unit	PathWest Laboratory Medicine WA Microbial Surveillance Unit et al
Austria/8638706/2022	EPI_ISL_11732627	2022-02-28	Institut für Lebensmittelsicherheit, Veterinärmedizin, Umwelt	Institut für Lebensmittelsicherheit, Veterinärmedizin, Umwelt	Gunther Vogl et al
Austria/A-LB4601/2022	EPI_ISL_12220328	2022-01-03	Pharmgenetix GmbH	Pharmgenetix GmbH	S. Vanoni et al
Austria/A-NN2315/2022	EPI_ISL_12712794	2022-01-20	Pharmgenetix GmbH	Pharmgenetix GmbH	S. Vanoni et al
Austria/A-NN2331/2022	EPI_ISL_12712795	2022-01-20	Pharmgenetix GmbH	Pharmgenetix GmbH	S. Vanoni et al
Austria/A-NN2341/2022	EPI_ISL_12647827	2022-01-20	Pharmgenetix GmbH	Pharmgenetix GmbH	S. Vanoni et al
Austria/A-NP1669/2022	EPI_ISL_12220329	2022-01-03	Pharmgenetix GmbH	Pharmgenetix GmbH	S. Vanoni et al
Austria/A-NP1729/2022	EPI_ISL_12220330	2022-01-04	Pharmgenetix GmbH	Pharmgenetix GmbH	S. Vanoni et al
Austria/A-WT3889/2022	EPI_ISL_12712802	2022-01-20	Pharmgenetix GmbH	Pharmgenetix GmbH	S. Vanoni et al
Austria/AGES-131559/2022	EPI_ISL_12317219	2022-02-28	Institut f. med. Mikrobiologie & Hygiene - Österr. AGES GmbH	Institut f. med. Mikrobiologie & Hygiene - Österr. AGES GmbH	Sabrina Posselt et al
Austria/AGES-131576/2022	EPI_ISL_12317228	2022-02-28	Institut f. med. Mikrobiologie & Hygiene - Österr. AGES GmbH	Institut f. med. Mikrobiologie & Hygiene - Österr. AGES GmbH	Sabrina Posselt et al
Austria/AGES-131577/2022	EPI_ISL_12317229	2022-02-28	Institut f. med. Mikrobiologie & Hygiene - Österr. AGES GmbH	Institut f. med. Mikrobiologie & Hygiene - Österr. AGES GmbH	Kathrin Lippert et al
Austria/AGES-131598/2022	EPI_ISL_12317246	2022-02-28	Institut f. med. Mikrobiologie & Hygiene - Österr. AGES GmbH	Institut f. med. Mikrobiologie & Hygiene - Österr. AGES GmbH	Sabrina Posselt et al
Austria/AGES-131602/2022	EPI_ISL_12317248	2022-02-28	Institut f. med. Mikrobiologie & Hygiene - Österr. AGES GmbH	Institut f. med. Mikrobiologie & Hygiene - Österr. AGES GmbH	Marion Blaschitz et al
Austria/AGES-131612/2022	EPI_ISL_12317255	2022-02-28	Institut f. med. Mikrobiologie & Hygiene - Österr. AGES GmbH	Institut f. med. Mikrobiologie & Hygiene - Österr. AGES GmbH	Sabrina Posselt et al
Austria/AGES-131615/2022	EPI_ISL_12317257	2022-02-28	Institut f. med. Mikrobiologie & Hygiene - Österr. AGES GmbH	Institut f. med. Mikrobiologie & Hygiene - Österr. AGES GmbH	Marion Blaschitz et al
Austria/AGES-131620/2022	EPI_ISL_12317261	2022-02-28	Institut f. med. Mikrobiologie & Hygiene - Österr. AGES GmbH	Institut f. med. Mikrobiologie & Hygiene - Österr. AGES GmbH	Sabrina Posselt et al
Austria/AGES-131625/2022	EPI_ISL_12317263	2022-02-28	Institut f. med. Mikrobiologie & Hygiene - Österr. AGES GmbH	Institut f. med. Mikrobiologie & Hygiene - Österr. AGES GmbH	Marion Blaschitz et al
Austria/AGES-131628/2022	EPI_ISL_12317265	2022-02-28	Institut f. med. Mikrobiologie & Hygiene - Österr. AGES GmbH	Institut f. med. Mikrobiologie & Hygiene - Österr. AGES GmbH	Kathrin Lippert et al
Austria/AGES-131630/2022	EPI_ISL_12317266	2022-02-28	Institut f. med. Mikrobiologie & Hygiene - Österr. AGES GmbH	Institut f. med. Mikrobiologie & Hygiene - Österr. AGES GmbH	Marion Blaschitz et al
Austria/AGES-131631/2022	EPI_ISL_12317267	2022-02-28	Institut f. med. Mikrobiologie & Hygiene - Österr. AGES GmbH	Institut f. med. Mikrobiologie & Hygiene - Österr. AGES GmbH	Sabrina Posselt et al
Austria/AGES-131635/2022	EPI_ISL_12317268	2022-02-28	Institut f. med. Mikrobiologie & Hygiene - Österr. AGES GmbH	Institut f. med. Mikrobiologie & Hygiene - Österr. AGES GmbH	Kathrin Lippert et al
Austria/AGES-131639/2022	EPI_ISL_12317271	2022-02-28	Institut f. med. Mikrobiologie & Hygiene - Österr. AGES GmbH	Institut f. med. Mikrobiologie & Hygiene - Österr. AGES GmbH	Kathrin Lippert et al
Austria/AGES-131646/2022	EPI_ISL_12317274	2022-02-28	Institut f. med. Mikrobiologie & Hygiene - Österr. AGES GmbH	Institut f. med. Mikrobiologie & Hygiene - Österr. AGES GmbH	Kathrin Lippert et al
Austria/AGES-131655/2022	EPI_ISL_12317278	2022-02-28	Institut f. med. Mikrobiologie & Hygiene - Österr. AGES GmbH	Institut f. med. Mikrobiologie & Hygiene - Österr. AGES GmbH	Marion Blaschitz et al
Austria/AGES-164086/2021	EPI_ISL_7954442	2021-12-02	AGES-Institute for medical Microbiology and Hygiene Vienna	AGES-Institute for medical Microbiology and Hygiene Vienna	Marion Blaschitz et al
Austria/AGES-165436/2021	EPI_ISL_9534403	2021-12-31	AGES-Institute for medical Microbiology and Hygiene Vienna	AGES-Institute for medical Microbiology and Hygiene Vienna	Magdalena Purker et al
Austria/AGES-166697/2021	EPI_ISL_10258708	2021-12-17	AGES-Institute for medical Microbiology and Hygiene Vienna	AGES-Institute for medical Microbiology and Hygiene Vienna	Marion Blaschitz et al
Austria/AGES-600247/2022	EPI_ISL_10258657	2022-01-01	AGES-Institute for medical Microbiology and Hygiene Vienna	AGES-Institute for medical Microbiology and Hygiene Vienna	Magdalena Purker et al
Austria/AGES-600521/2022	EPI_ISL_10258702	2022-01-01	AGES-Institute for medical Microbiology and Hygiene Vienna	AGES-Institute for medical Microbiology and Hygiene Vienna	Marion Blaschitz et al
Austria/AGES-603436/2022	EPI_ISL_10265681	2022-01-06	AGES-Institute for medical Microbiology and Hygiene Vienna	AGES-Institute for medical Microbiology and Hygiene Vienna	Marion Blaschitz et al
Austria/AGES-603455/2022	EPI_ISL_10258568	2022-01-06	AGES-Institute for medical Microbiology and Hygiene Vienna	AGES-Institute for medical Microbiology and Hygiene Vienna	Magdalena Purker et al
Austria/AGES-603468/2022	EPI_ISL_10258692	2022-01-06	AGES-Institute for medical Microbiology and Hygiene Vienna	AGES-Institute for medical Microbiology and Hygiene Vienna	Magdalena Purker et al
Austria/AGES-603493/2022	EPI_ISL_10258713	2022-01-06	AGES-Institute for medical Microbiology and Hygiene Vienna	AGES-Institute for medical Microbiology and Hygiene Vienna	Kathrin Lippert et al
Austria/AGES-603503/2022	EPI_ISL_10258613	2022-01-06	AGES-Institute for medical Microbiology and Hygiene Vienna	AGES-Institute for medical Microbiology and Hygiene Vienna	Marion Blaschitz et al
Austria/AGES-603556/2022	EPI_ISL_10258368	2022-01-06	AGES-Institute for medical Microbiology and Hygiene Vienna	AGES-Institute for medical Microbiology and Hygiene Vienna	Magdalena Purker et al
Austria/AGES-603559/2022	EPI_ISL_10258645	2022-01-06	AGES-Institute for medical Microbiology and Hygiene Vienna	AGES-Institute for medical Microbiology and Hygiene Vienna	Marion Blaschitz et al
Austria/AGES-603562/2022	EPI_ISL_10258607	2022-01-06	AGES-Institute for medical Microbiology and Hygiene Vienna	AGES-Institute for medical Microbiology and Hygiene Vienna	Magdalena Purker et al
Austria/AGES-604340/2022	EPI_ISL_10258668	2022-01-01	AGES-Institute for medical Microbiology and Hygiene Vienna	AGES-Institute for medical Microbiology and Hygiene Vienna	Magdalena Purker et al
Austria/AGES-604992/2022	EPI_ISL_10258690	2022-01-08	AGES-Institute for medical Microbiology and Hygiene Vienna	AGES-Institute for medical Microbiology and Hygiene Vienna	Kathrin Lippert et al
Austria/AGES-604998/2022	EPI_ISL_10258550	2022-01-08	AGES-Institute for medical Microbiology and Hygiene Vienna	AGES-Institute for medical Microbiology and Hygiene Vienna	Marion Blaschitz et al
Austria/AGES-605042/2022	EPI_ISL_10258620	2022-01-08	AGES-Institute for medical Microbiology and Hygiene Vienna	AGES-Institute for medical Microbiology and Hygiene Vienna	Kathrin Lippert et al
Austria/AGES-605069/2022	EPI_ISL_10258709	2022-01-08	AGES-Institute for medical Microbiology and Hygiene Vienna	AGES-Institute for medical Microbiology and Hygiene Vienna	Marion Blaschitz et al
Austria/AGES-605106/2022	EPI_ISL_10258600	2022-01-08	AGES-Institute for medical Microbiology and Hygiene Vienna	AGES-Institute for medical Microbiology and Hygiene Vienna	Kathrin Lippert et al
Austria/AGES-605159/2022	EPI_ISL_10258389	2022-01-01	AGES-Institute for medical Microbiology and Hygiene Vienna	AGES-Institute for medical Microbiology and Hygiene Vienna	Kathrin Lippert et al
Austria/AGES-605207/2022	EPI_ISL_10258417	2022-01-01	AGES-Institute for medical Microbiology and Hygiene Vienna	AGES-Institute for medical Microbiology and Hygiene Vienna	Kathrin Lippert et al
Austria/AGES-605291/2022	EPI_ISL_10258705	2022-01-01	AGES-Institute for medical Microbiology and Hygiene Vienna	AGES-Institute for medical Microbiology and Hygiene Vienna	Kathrin Lippert et al
Austria/AGES-609140/2022	EPI_ISL_10258653	2022-01-01	AGES-Institute for medical Microbiology and Hygiene Vienna	AGES-Institute for medical Microbiology and Hygiene Vienna	Kathrin Lippert et al
Austria/AGES-612701/2022	EPI_ISL_10258693	2022-01-01	AGES-Institute for medical Microbiology and Hygiene Vienna	AGES-Institute for medical Microbiology and Hygiene Vienna	Magdalena Purker et al
Austria/AGES-612712/2022	EPI_ISL_10258463	2022-01-01	AGES-Institute for medical Microbiology and Hygiene Vienna	AGES-Institute for medical Microbiology and Hygiene Vienna	Magdalena Purker et al
Austria/AGES-614008/2022	EPI_ISL_10258328	2022-01-01	AGES-Institute for medical Microbiology and Hygiene Vienna	AGES-Institute for medical Microbiology and Hygiene Vienna	Magdalena Purker et al
Austria/AGES-619894/2021	EPI_ISL_10258334	2021-08-21	AGES-Institute for medical Microbiology and Hygiene Vienna	AGES-Institute for medical Microbiology and Hygiene Vienna	Magdalena Purker et al
Austria/AGES-619913/2022	EPI_ISL_10258646	2022-01-01	AGES-Institute for medical Microbiology and Hygiene Vienna	AGES-Institute for medical Microbiology and Hygiene Vienna	Marion Blaschitz et al
Austria/AGES-620018/2022	EPI_ISL_10258308	2022-01-01	AGES-Institute for medical Microbiology and Hygiene Vienna	AGES-Institute for medical Microbiology and Hygiene Vienna	Magdalena Purker et al
Austria/AGES-620053/2022	EPI_ISL_10258392	2022-01-01	AGES-Institute for medical Microbiology and Hygiene Vienna	AGES-Institute for medical Microbiology and Hygiene Vienna	Kathrin Lippert et al
Austria/AGES-622267/2022	EPI_ISL_10258643	2022-01-24	AGES-Institute for medical Microbiology and Hygiene Vienna	AGES-Institute for medical Microbiology and Hygiene Vienna	Magdalena Purker et al
Austria/AGES-623082/2022	EPI_ISL_10258395	2022-01-01	AGES-Institute for medical Microbiology and Hygiene Vienna	AGES-Institute for medical Microbiology and Hygiene Vienna	Magdalena Purker et al
Austria/AGES-624915/2022	EPI_ISL_10741562	2022-02-01	AGES-Institute for medical Microbiology and Hygiene Vienna	AGES-Institute for medical Microbiology and Hygiene Vienna	Kathrin Lippert et al
Austria/AGES-624918/2022	EPI_ISL_10741564	2022-02-01	AGES-Institute for medical Microbiology and Hygiene Vienna	AGES-Institute for medical Microbiology and Hygiene Vienna	Magdalena Purker et al
Austria/AGES-624930/2022	EPI_ISL_10741568	2022-02-01	AGES-Institute for medical Microbiology and Hygiene Vienna	AGES-Institute for medical Microbiology and Hygiene Vienna	Kathrin Lippert et al
Austria/AGES-624936/2022	EPI_ISL_10741570	2022-02-01	AGES-Institute for medical Microbiology and Hygiene Vienna	AGES-Institute for medical Microbiology and Hygiene Vienna	Magdalena Purker et al
Austria/AGES-624959/2022	EPI_ISL_10741575	2022-02-01	AGES-Institute for medical Microbiology and Hygiene Vienna	AGES-Institute for medical Microbiology and Hygiene Vienna	Marion Blaschitz et al
Austria/AGES-626302/2022	EPI_ISL_10741421	2022-02-01	AGES-Institute for medical Microbiology and Hygiene Vienna	AGES-Institute for medical Microbiology and Hygiene Vienna	Kathrin Lippert et al
Austria/AGES-626606/2022	EPI_ISL_10741434	2022-02-01	AGES-Institute for medical Microbiology and Hygiene Vienna	AGES-Institute for medical Microbiology and Hygiene Vienna	Marion Blaschitz et al
Austria/AGES-626607/2022	EPI_ISL_10741435	2022-02-01	AGES-Institute for medical Microbiology and Hygiene Vienna	AGES-Institute for medical Microbiology and Hygiene Vienna	Magdalena Purker et al
Austria/AGES-626802/2022	EPI_ISL_10741450	2022-02-01	AGES-Institute for medical Microbiology and Hygiene Vienna	AGES-Institute for medical Microbiology and Hygiene Vienna	Magdalena Purker et al
Austria/AGES-628534/2022	EPI_ISL_10741457	2022-02-01	AGES-Institute for medical Microbiology and Hygiene Vienna	AGES-Institute for medical Microbiology and Hygiene Vienna	Marion Blaschitz et al
Austria/AGES-628601/2022	EPI_ISL_10741463	2022-02-01	AGES-Institute for medical Microbiology and Hygiene Vienna	AGES-Institute for medical Microbiology and Hygiene Vienna	Marion Blaschitz et al
Austria/AGES-628609/2022	EPI_ISL_10741467	2022-02-01	AGES-Institute for medical Microbiology and Hygiene Vienna	AGES-Institute for medical Microbiology and Hygiene Vienna	Marion Blaschitz et al
Austria/AGES-628613/2022	EPI_ISL_10741469	2022-02-01	AGES-Institute for medical Microbiology and Hygiene Vienna	AGES-Institute for medical Microbiology and Hygiene Vienna	Kathrin Lippert et al
Austria/AGES-628682/2022	EPI_ISL_10741488	2022-02-01	AGES-Institute for medical Microbiology and Hygiene Vienna	AGES-Institute for medical Microbiology and Hygiene Vienna	Marion Blaschitz et al
Austria/AGES-631524/2022	EPI_ISL_11024651	2022-02-01	AGES-Institute for medical Microbiology and Hygiene Vienna	AGES-Institute for medical Microbiology and Hygiene Vienna	Magdalena Purker et al
Austria/AGES-631627/2022	EPI_ISL_11024653	2022-01-30	AGES-Institute for medical Microbiology and Hygiene Vienna	AGES-Institute for medical Microbiology and Hygiene Vienna	Magdalena Purker et al
Austria/AGES-631666/2022	EPI_ISL_11024654	2022-02-01	AGES-Institute for medical Microbiology and Hygiene Vienna	AGES-Institute for medical Microbiology and Hygiene Vienna	Magdalena Purker et al
Austria/AGES-631668/2022	EPI_ISL_11024655	2022-01-30	AGES-Institute for medical Microbiology and Hygiene Vienna	AGES-Institute for medical Microbiology and Hygiene Vienna	Magdalena Purker et al
Austria/AGES-631689/2022	EPI_ISL_11024656	2022-02-01	AGES-Institute for medical Microbiology and Hygiene Vienna	AGES-Institute for medical Microbiology and Hygiene Vienna	Magdalena Purker et al
Austria/AGES-631818/2022	EPI_ISL_11024706	2022-02-01	AGES-Institute for medical Microbiology and Hygiene Vienna	AGES-Institute for medical Microbiology and Hygiene Vienna	Magdalena Purker et al
Austria/AGES-631835/2022	EPI_ISL_11024778	2022-01-30	AGES-Institute for medical Microbiology and Hygiene Vienna	AGES-Institute for medical Microbiology and Hygiene Vienna	Magdalena Purker et al
Austria/AGES-632132/2022	EPI_ISL_11024667	2022-02-01	AGES-Institute for medical Microbiology and Hygiene Vienna	AGES-Institute for medical Microbiology and Hygiene Vienna	Magdalena Purker et al
Austria/AGES-632174/2022	EPI_ISL_11024668	2022-01-30	AGES-Institute for medical Microbiology and Hygiene Vienna	AGES-Institute for medical Microbiology and Hygiene Vienna	Magdalena Purker et al
Austria/AGES-632210/2022	EPI_ISL_11024669	2022-02-01	AGES-Institute for medical Microbiology and Hygiene Vienna	AGES-Institute for medical Microbiology and Hygiene Vienna	Magdalena Purker et al
Austria/AGES-633571/2022	EPI_ISL_11024671	2022-01-31	AGES-Institute for medical Microbiology and Hygiene Vienna	AGES-Institute for medical Microbiology and Hygiene Vienna	Magdalena Purker et al
Austria/AGES-633573/2022	EPI_ISL_11024820	2022-01-31	AGES-Institute for medical Microbiology and Hygiene Vienna	AGES-Institute for medical Microbiology and Hygiene Vienna	Magdalena Purker et al
Austria/AGES-633581/2022	EPI_ISL_11024730	2022-01-31	AGES-Institute for medical Microbiology and Hygiene Vienna	AGES-Institute for medical Microbiology and Hygiene Vienna	Magdalena Purker et al
Austria/AGES-633642/2022	EPI_ISL_11024677	2022-01-31	AGES-Institute for medical Microbiology and Hygiene Vienna	AGES-Institute for medical Microbiology and Hygiene Vienna	Magdalena Purker et al
Austria/AGES-633702/2022	EPI_ISL_11024681	2022-01-31	AGES-Institute for medical Microbiology and Hygiene Vienna	AGES-Institute for medical Microbiology and Hygiene Vienna	Magdalena Purker et al
Austria/AGES-633776/2022	EPI_ISL_11024684	2022-01-31	AGES-Institute for medical Microbiology and Hygiene Vienna	AGES-Institute for medical Microbiology and Hygiene Vienna	Magdalena Purker et al
Austria/AGES-634212/2022	EPI_ISL_10741579	2022-02-01	AGES-Institute for medical Microbiology and Hygiene Vienna	AGES-Institute for medical Microbiology and Hygiene Vienna	Magdalena Purker et al
Austria/AGES-634213/2022	EPI_ISL_10741580	2022-02-01	AGES-Institute for medical Microbiology and Hygiene Vienna	AGES-Institute for medical Microbiology and Hygiene Vienna	Kathrin Lippert et al
Austria/AGES-634224/2022	EPI_ISL_10741587	2022-02-01	AGES-Institute for medical Microbiology and Hygiene Vienna	AGES-Institute for medical Microbiology and Hygiene Vienna	Marion Blaschitz et al
Austria/AGES-635213/2022	EPI_ISL_12317167	2022-02-02	Institut f. med. Mikrobiologie & Hygiene - Österr. AGES GmbH	Institut f. med. Mikrobiologie & Hygiene - Österr. AGES GmbH	Marion Blaschitz et al
Austria/AGES-635240/2022	EPI_ISL_10741591	2022-01-01	AGES-Institute for medical Microbiology and Hygiene Vienna	AGES-Institute for medical Microbiology and Hygiene Vienna	Kathrin Lippert et al
Austria/AGES-635244/2022	EPI_ISL_10741593	2022-01-01	AGES-Institute for medical Microbiology and Hygiene Vienna	AGES-Institute for medical Microbiology and Hygiene Vienna	Magdalena Purker et al
Austria/AGES-635253/2022	EPI_ISL_10741594	2022-01-01	AGES-Institute for medical Microbiology and Hygiene Vienna	AGES-Institute for medical Microbiology and Hygiene Vienna	Kathrin Lippert et al
Austria/AGES-635264/2022	EPI_ISL_10741595	2022-01-01	AGES-Institute for medical Microbiology and Hygiene Vienna	AGES-Institute for medical Microbiology and Hygiene Vienna	Marion Blaschitz et al
Austria/AGES-635288/2022	EPI_ISL_10741597	2022-01-13	AGES-Institute for medical Microbiology and Hygiene Vienna	AGES-Institute for medical Microbiology and Hygiene Vienna	Kathrin Lippert et al
Austria/AGES-635310/2022	EPI_ISL_10741601	2022-01-01	AGES-Institute for medical Microbiology and Hygiene Vienna	AGES-Institute for medical Microbiology and Hygiene Vienna	Marion Blaschitz et al
Austria/AGES-635354/2022	EPI_ISL_12317172	2022-02-02	Institut f. med. Mikrobiologie & Hygiene - Österr. AGES GmbH	Institut f. med. Mikrobiologie & Hygiene - Österr. AGES GmbH	Kathrin Lippert et al
Austria/AGES-635465/2022	EPI_ISL_12317180	2022-02-02	Institut f. med. Mikrobiologie & Hygiene - Österr. AGES GmbH	Institut f. med. Mikrobiologie & Hygiene - Österr. AGES GmbH	Sabrina Posselt et al
Austria/AGES-635560/2022	EPI_ISL_12317188	2022-02-02	Institut f. med. Mikrobiologie & Hygiene - Österr. AGES GmbH	Institut f. med. Mikrobiologie & Hygiene - Österr. AGES GmbH	Marion Blaschitz et al
Austria/AGES-635562/2022	EPI_ISL_12317189	2022-02-02	Institut f. med. Mikrobiologie & Hygiene - Österr. AGES GmbH	Institut f. med. Mikrobiologie & Hygiene - Österr. AGES GmbH	Sabrina Posselt et al
Austria/AGES-635564/2022	EPI_ISL_12317190	2022-02-02	Institut f. med. Mikrobiologie & Hygiene - Österr. AGES GmbH	Institut f. med. Mikrobiologie & Hygiene - Österr. AGES GmbH	Kathrin Lippert et al
Austria/AGES-635582/2022	EPI_ISL_12317193	2022-02-02	Institut f. med. Mikrobiologie & Hygiene - Österr. AGES GmbH	Institut f. med. Mikrobiologie & Hygiene - Österr. AGES GmbH	Kathrin Lippert et al
Austria/AGES-635633/2022	EPI_ISL_12317201	2022-02-02	Institut f. med. Mikrobiologie & Hygiene - Österr. AGES GmbH	Institut f. med. Mikrobiologie & Hygiene - Österr. AGES GmbH	Sabrina Posselt et al
Austria/AGES-635637/2022	EPI_ISL_12317202	2022-02-02	Institut f. med. Mikrobiologie & Hygiene - Österr. AGES GmbH	Institut f. med. Mikrobiologie & Hygiene - Österr. AGES GmbH	Kathrin Lippert et al
Austria/AGES-635664/2022	EPI_ISL_12317207	2022-02-02	Institut f. med. Mikrobiologie & Hygiene - Österr. AGES GmbH	Institut f. med. Mikrobiologie & Hygiene - Österr. AGES GmbH	Sabrina Posselt et al
Austria/AGES-636807/2022	EPI_ISL_12317212	2022-02-03	Institut f. med. Mikrobiologie & Hygiene - Österr. AGES GmbH	Institut f. med. Mikrobiologie & Hygiene - Österr. AGES GmbH	Marion Blaschitz et al
Austria/AGES-636810/2022	EPI_ISL_12317213	2022-02-03	Institut f. med. Mikrobiologie & Hygiene - Österr. AGES GmbH	Institut f. med. Mikrobiologie & Hygiene - Österr. AGES GmbH	Sabrina Posselt et al
Austria/AGES-637908/2022	EPI_ISL_11024714	2022-02-01	AGES-Institute for medical Microbiology and Hygiene Vienna	AGES-Institute for medical Microbiology and Hygiene Vienna	Magdalena Purker et al
Austria/AGES-637922/2022	EPI_ISL_11024770	2022-02-01	AGES-Institute for medical Microbiology and Hygiene Vienna	AGES-Institute for medical Microbiology and Hygiene Vienna	Magdalena Purker et al
Austria/AGES-638013/2022	EPI_ISL_11024782	2022-02-01	AGES-Institute for medical Microbiology and Hygiene Vienna	AGES-Institute for medical Microbiology and Hygiene Vienna	Magdalena Purker et al
Austria/AGES-638384/2022	EPI_ISL_11024715	2022-02-01	AGES-Institute for medical Microbiology and Hygiene Vienna	AGES-Institute for medical Microbiology and Hygiene Vienna	Magdalena Purker et al
Austria/AGES-638503/2022	EPI_ISL_11024736	2022-02-01	AGES-Institute for medical Microbiology and Hygiene Vienna	AGES-Institute for medical Microbiology and Hygiene Vienna	Magdalena Purker et al
Austria/AGES-638660/2022	EPI_ISL_11024722	2022-02-03	AGES-Institute for medical Microbiology and Hygiene Vienna	AGES-Institute for medical Microbiology and Hygiene Vienna	Magdalena Purker et al
Austria/AGES-638701/2022	EPI_ISL_11024822	2022-02-03	AGES-Institute for medical Microbiology and Hygiene Vienna	AGES-Institute for medical Microbiology and Hygiene Vienna	Magdalena Purker et al
Austria/AGES-638938/2022	EPI_ISL_11024821	2022-02-03	AGES-Institute for medical Microbiology and Hygiene Vienna	AGES-Institute for medical Microbiology and Hygiene Vienna	Magdalena Purker et al
Austria/AGES-638941/2022	EPI_ISL_11024743	2022-02-03	AGES-Institute for medical Microbiology and Hygiene Vienna	AGES-Institute for medical Microbiology and Hygiene Vienna	Magdalena Purker et al
Austria/AGES-640660/2022	EPI_ISL_11024831	2022-02-04	AGES-Institute for medical Microbiology and Hygiene Vienna	AGES-Institute for medical Microbiology and Hygiene Vienna	Magdalena Purker et al
Austria/AGES-640697/2022	EPI_ISL_11024737	2022-02-04	AGES-Institute for medical Microbiology and Hygiene Vienna	AGES-Institute for medical Microbiology and Hygiene Vienna	Magdalena Purker et al
Austria/AGES-640814/2022	EPI_ISL_11024819	2022-02-01	AGES-Institute for medical Microbiology and Hygiene Vienna	AGES-Institute for medical Microbiology and Hygiene Vienna	Magdalena Purker et al
Austria/AGES-641899/2022	EPI_ISL_11024830	2022-02-01	AGES-Institute for medical Microbiology and Hygiene Vienna	AGES-Institute for medical Microbiology and Hygiene Vienna	Magdalena Purker et al
Austria/AGES-641903/2022	EPI_ISL_12317341	2022-02-06	Institut f. med. Mikrobiologie & Hygiene - Österr. AGES GmbH	Institut f. med. Mikrobiologie & Hygiene - Österr. AGES GmbH	Marion Blaschitz et al
Austria/AGES-642159/2022	EPI_ISL_11024769	2022-02-01	AGES-Institute for medical Microbiology and Hygiene Vienna	AGES-Institute for medical Microbiology and Hygiene Vienna	Magdalena Purker et al
Austria/AGES-642212/2022	EPI_ISL_11024712	2022-02-01	AGES-Institute for medical Microbiology and Hygiene Vienna	AGES-Institute for medical Microbiology and Hygiene Vienna	Magdalena Purker et al
Austria/AGES-642283/2022	EPI_ISL_11024741	2022-02-01	AGES-Institute for medical Microbiology and Hygiene Vienna	AGES-Institute for medical Microbiology and Hygiene Vienna	Magdalena Purker et al
Austria/AGES-642324/2022	EPI_ISL_11024787	2022-02-01	AGES-Institute for medical Microbiology and Hygiene Vienna	AGES-Institute for medical Microbiology and Hygiene Vienna	Magdalena Purker et al
Austria/AGES-642383/2022	EPI_ISL_11024763	2022-02-01	AGES-Institute for medical Microbiology and Hygiene Vienna	AGES-Institute for medical Microbiology and Hygiene Vienna	Magdalena Purker et al
Austria/AGES-654056/2022	EPI_ISL_10741495	2022-02-01	AGES-Institute for medical Microbiology and Hygiene Vienna	AGES-Institute for medical Microbiology and Hygiene Vienna	Kathrin Lippert et al
Austria/AGES-654152/2022	EPI_ISL_10741503	2022-02-01	AGES-Institute for medical Microbiology and Hygiene Vienna	AGES-Institute for medical Microbiology and Hygiene Vienna	Magdalena Purker et al
Austria/AGES-654158/2022	EPI_ISL_10741504	2022-02-01	AGES-Institute for medical Microbiology and Hygiene Vienna	AGES-Institute for medical Microbiology and Hygiene Vienna	Kathrin Lippert et al
Austria/AGES-654172/2022	EPI_ISL_10741505	2022-02-01	AGES-Institute for medical Microbiology and Hygiene Vienna	AGES-Institute for medical Microbiology and Hygiene Vienna	Marion Blaschitz et al
Austria/AGES-654186/2022	EPI_ISL_10741508	2022-02-01	AGES-Institute for medical Microbiology and Hygiene Vienna	AGES-Institute for medical Microbiology and Hygiene Vienna	Marion Blaschitz et al
Austria/AGES-654213/2022	EPI_ISL_10741510	2022-02-01	AGES-Institute for medical Microbiology and Hygiene Vienna	AGES-Institute for medical Microbiology and Hygiene Vienna	Kathrin Lippert et al
Austria/AGES-654359/2022	EPI_ISL_10741519	2022-02-01	AGES-Institute for medical Microbiology and Hygiene Vienna	AGES-Institute for medical Microbiology and Hygiene Vienna	Kathrin Lippert et al
Austria/AGES-654417/2022	EPI_ISL_10741522	2022-02-13	AGES-Institute for medical Microbiology and Hygiene Vienna	AGES-Institute for medical Microbiology and Hygiene Vienna	Kathrin Lippert et al
Austria/AGES-654738/2022	EPI_ISL_10741529	2022-02-13	AGES-Institute for medical Microbiology and Hygiene Vienna	AGES-Institute for medical Microbiology and Hygiene Vienna	Marion Blaschitz et al
Austria/AGES-655447/2022	EPI_ISL_10741533	2022-02-10	AGES-Institute for medical Microbiology and Hygiene Vienna	AGES-Institute for medical Microbiology and Hygiene Vienna	Marion Blaschitz et al
Austria/AGES-655449/2022	EPI_ISL_10741534	2022-02-01	AGES-Institute for medical Microbiology and Hygiene Vienna	AGES-Institute for medical Microbiology and Hygiene Vienna	Magdalena Purker et al
Austria/AGES-655452/2022	EPI_ISL_10741537	2022-02-15	AGES-Institute for medical Microbiology and Hygiene Vienna	AGES-Institute for medical Microbiology and Hygiene Vienna	Magdalena Purker et al
Austria/AGES-655467/2022	EPI_ISL_10741544	2022-02-01	AGES-Institute for medical Microbiology and Hygiene Vienna	AGES-Institute for medical Microbiology and Hygiene Vienna	Kathrin Lippert et al
Austria/AGES-655474/2022	EPI_ISL_10741548	2022-02-11	AGES-Institute for medical Microbiology and Hygiene Vienna	AGES-Institute for medical Microbiology and Hygiene Vienna	Marion Blaschitz et al
Austria/AGES-655623/2021	EPI_ISL_10741551	2021-11-04	AGES-Institute for medical Microbiology and Hygiene Vienna	AGES-Institute for medical Microbiology and Hygiene Vienna	Marion Blaschitz et al
Austria/AGES-655623/2022	EPI_ISL_12317214	2022-02-18	Institut f. med. Mikrobiologie & Hygiene - Österr. AGES GmbH	Institut f. med. Mikrobiologie & Hygiene - Österr. AGES GmbH	Kathrin Lippert et al
Austria/AGES-659310/2022	EPI_ISL_12317305	2022-03-07	Institut f. med. Mikrobiologie & Hygiene - Österr. AGES GmbH	Institut f. med. Mikrobiologie & Hygiene - Österr. AGES GmbH	Marion Blaschitz et al
Austria/AGES-659424/2022	EPI_ISL_12317105	2022-03-04	Institut f. med. Mikrobiologie & Hygiene - Österr. AGES GmbH	Institut f. med. Mikrobiologie & Hygiene - Österr. AGES GmbH	Kathrin Lippert et al
Austria/AGES-659430/2022	EPI_ISL_12317107	2022-03-04	Institut f. med. Mikrobiologie & Hygiene - Österr. AGES GmbH	Institut f. med. Mikrobiologie & Hygiene - Österr. AGES GmbH	Sabrina Posselt et al
Austria/AGES-659717/2022	EPI_ISL_12317115	2022-03-04	Institut f. med. Mikrobiologie & Hygiene - Österr. AGES GmbH	Institut f. med. Mikrobiologie & Hygiene - Österr. AGES GmbH	Sabrina Posselt et al
Austria/AGES-659729/2022	EPI_ISL_12317118	2022-03-04	Institut f. med. Mikrobiologie & Hygiene - Österr. AGES GmbH	Institut f. med. Mikrobiologie & Hygiene - Österr. AGES GmbH	Sabrina Posselt et al
Austria/AGES-659732/2022	EPI_ISL_12317119	2022-03-04	Institut f. med. Mikrobiologie & Hygiene - Österr. AGES GmbH	Institut f. med. Mikrobiologie & Hygiene - Österr. AGES GmbH	Kathrin Lippert et al
Austria/AGES-659735/2022	EPI_ISL_12317120	2022-03-04	Institut f. med. Mikrobiologie & Hygiene - Österr. AGES GmbH	Institut f. med. Mikrobiologie & Hygiene - Österr. AGES GmbH	Marion Blaschitz et al
Austria/AGES-659738/2022	EPI_ISL_12317121	2022-03-04	Institut f. med. Mikrobiologie & Hygiene - Österr. AGES GmbH	Institut f. med. Mikrobiologie & Hygiene - Österr. AGES GmbH	Sabrina Posselt et al
Austria/AGES-659746/2022	EPI_ISL_12317124	2022-03-04	Institut f. med. Mikrobiologie & Hygiene - Österr. AGES GmbH	Institut f. med. Mikrobiologie & Hygiene - Österr. AGES GmbH	Sabrina Posselt et al
Austria/AGES-659750/2022	EPI_ISL_12317126	2022-03-04	Institut f. med. Mikrobiologie & Hygiene - Österr. AGES GmbH	Institut f. med. Mikrobiologie & Hygiene - Österr. AGES GmbH	Marion Blaschitz et al
Austria/AGES-659753/2022	EPI_ISL_12317127	2022-03-04	Institut f. med. Mikrobiologie & Hygiene - Österr. AGES GmbH	Institut f. med. Mikrobiologie & Hygiene - Österr. AGES GmbH	Sabrina Posselt et al
Austria/AGES-659762/2022	EPI_ISL_12317129	2022-03-04	Institut f. med. Mikrobiologie & Hygiene - Österr. AGES GmbH	Institut f. med. Mikrobiologie & Hygiene - Österr. AGES GmbH	Marion Blaschitz et al
Austria/AGES-659767/2022	EPI_ISL_12317130	2022-03-04	Institut f. med. Mikrobiologie & Hygiene - Österr. AGES GmbH	Institut f. med. Mikrobiologie & Hygiene - Österr. AGES GmbH	Kathrin Lippert et al
Austria/AGES-659768/2022	EPI_ISL_12317131	2022-03-04	Institut f. med. Mikrobiologie & Hygiene - Österr. AGES GmbH	Institut f. med. Mikrobiologie & Hygiene - Österr. AGES GmbH	Marion Blaschitz et al
Austria/AGES-659788/2022	EPI_ISL_12317138	2022-03-04	Institut f. med. Mikrobiologie & Hygiene - Österr. AGES GmbH	Institut f. med. Mikrobiologie & Hygiene - Österr. AGES GmbH	Sabrina Posselt et al
Austria/AGES-659815/2022	EPI_ISL_12317147	2022-03-04	Institut f. med. Mikrobiologie & Hygiene - Österr. AGES GmbH	Institut f. med. Mikrobiologie & Hygiene - Österr. AGES GmbH	Sabrina Posselt et al
Austria/AGES-659845/2022	EPI_ISL_12317153	2022-03-04	Institut f. med. Mikrobiologie & Hygiene - Österr. AGES GmbH	Institut f. med. Mikrobiologie & Hygiene - Österr. AGES GmbH	Sabrina Posselt et al
Austria/AGES-660664/2022	EPI_ISL_12316924	2022-02-19	Institut f. med. Mikrobiologie & Hygiene - Österr. AGES GmbH	Institut f. med. Mikrobiologie & Hygiene - Österr. AGES GmbH	Sabrina Posselt et al
Austria/AGES-660989/2022	EPI_ISL_12316930	2022-02-25	Institut f. med. Mikrobiologie & Hygiene - Österr. AGES GmbH	Institut f. med. Mikrobiologie & Hygiene - Österr. AGES GmbH	Sabrina Posselt et al
Austria/AGES-661085/2022	EPI_ISL_12316935	2022-02-11	Institut f. med. Mikrobiologie & Hygiene - Österr. AGES GmbH	Institut f. med. Mikrobiologie & Hygiene - Österr. AGES GmbH	Marion Blaschitz et al
Austria/AGES-661100/2022	EPI_ISL_12316937	2022-02-11	Institut f. med. Mikrobiologie & Hygiene - Österr. AGES GmbH	Institut f. med. Mikrobiologie & Hygiene - Österr. AGES GmbH	Kathrin Lippert et al
Austria/AGES-661101/2022	EPI_ISL_12316938	2022-02-11	Institut f. med. Mikrobiologie & Hygiene - Österr. AGES GmbH	Institut f. med. Mikrobiologie & Hygiene - Österr. AGES GmbH	Marion Blaschitz et al
Austria/AGES-661103/2022	EPI_ISL_12316939	2022-02-11	Institut f. med. Mikrobiologie & Hygiene - Österr. AGES GmbH	Institut f. med. Mikrobiologie & Hygiene - Österr. AGES GmbH	Sabrina Posselt et al
Austria/AGES-661285/2022	EPI_ISL_12316943	2022-02-25	Institut f. med. Mikrobiologie & Hygiene - Österr. AGES GmbH	Institut f. med. Mikrobiologie & Hygiene - Österr. AGES GmbH	Kathrin Lippert et al
Austria/AGES-661286/2022	EPI_ISL_12316944	2022-02-25	Institut f. med. Mikrobiologie & Hygiene - Österr. AGES GmbH	Institut f. med. Mikrobiologie & Hygiene - Österr. AGES GmbH	Marion Blaschitz et al
Austria/AGES-661350/2022	EPI_ISL_11024694	2022-01-01	AGES-Institute for medical Microbiology and Hygiene Vienna	AGES-Institute for medical Microbiology and Hygiene Vienna	Magdalena Purker et al
Austria/AGES-661355/2022	EPI_ISL_11024695	2022-01-01	AGES-Institute for medical Microbiology and Hygiene Vienna	AGES-Institute for medical Microbiology and Hygiene Vienna	Magdalena Purker et al
Austria/AGES-662280/2022	EPI_ISL_11024697	2022-01-01	AGES-Institute for medical Microbiology and Hygiene Vienna	AGES-Institute for medical Microbiology and Hygiene Vienna	Magdalena Purker et al
Austria/AGES-662359/2022	EPI_ISL_11024701	2022-01-01	AGES-Institute for medical Microbiology and Hygiene Vienna	AGES-Institute for medical Microbiology and Hygiene Vienna	Magdalena Purker et al
Austria/AGES-662422/2022	EPI_ISL_12317316	2022-03-07	Institut f. med. Mikrobiologie & Hygiene - Österr. AGES GmbH	Institut f. med. Mikrobiologie & Hygiene - Österr. AGES GmbH	Kathrin Lippert et al
Austria/AGES-662441/2022	EPI_ISL_12317319	2022-03-07	Institut f. med. Mikrobiologie & Hygiene - Österr. AGES GmbH	Institut f. med. Mikrobiologie & Hygiene - Österr. AGES GmbH	Kathrin Lippert et al
Austria/AGES-662442/2022	EPI_ISL_11024704	2022-02-19	AGES-Institute for medical Microbiology and Hygiene Vienna	AGES-Institute for medical Microbiology and Hygiene Vienna	Magdalena Purker et al
Austria/AGES-662802/2022	EPI_ISL_12316951	2022-02-25	Institut f. med. Mikrobiologie & Hygiene - Österr. AGES GmbH	Institut f. med. Mikrobiologie & Hygiene - Österr. AGES GmbH	Sabrina Posselt et al
Austria/AGES-662820/2022	EPI_ISL_12316952	2022-02-25	Institut f. med. Mikrobiologie & Hygiene - Österr. AGES GmbH	Institut f. med. Mikrobiologie & Hygiene - Österr. AGES GmbH	Kathrin Lippert et al
Austria/AGES-662849/2022	EPI_ISL_12316957	2022-02-25	Institut f. med. Mikrobiologie & Hygiene - Österr. AGES GmbH	Institut f. med. Mikrobiologie & Hygiene - Österr. AGES GmbH	Sabrina Posselt et al
Austria/AGES-662850/2022	EPI_ISL_12316958	2022-02-25	Institut f. med. Mikrobiologie & Hygiene - Österr. AGES GmbH	Institut f. med. Mikrobiologie & Hygiene - Österr. AGES GmbH	Kathrin Lippert et al
Austria/AGES-662853/2022	EPI_ISL_12316961	2022-02-25	Institut f. med. Mikrobiologie & Hygiene - Österr. AGES GmbH	Institut f. med. Mikrobiologie & Hygiene - Österr. AGES GmbH	Kathrin Lippert et al
Austria/AGES-662887/2022	EPI_ISL_12316965	2022-02-25	Institut f. med. Mikrobiologie & Hygiene - Österr. AGES GmbH	Institut f. med. Mikrobiologie & Hygiene - Österr. AGES GmbH	Marion Blaschitz et al
Austria/AGES-662888/2022	EPI_ISL_12316966	2022-02-25	Institut f. med. Mikrobiologie & Hygiene - Österr. AGES GmbH	Institut f. med. Mikrobiologie & Hygiene - Österr. AGES GmbH	Sabrina Posselt et al
Austria/AGES-662893/2022	EPI_ISL_12316971	2022-02-18	Institut f. med. Mikrobiologie & Hygiene - Österr. AGES GmbH	Institut f. med. Mikrobiologie & Hygiene - Österr. AGES GmbH	Marion Blaschitz et al
Austria/AGES-663558/2022	EPI_ISL_12317028	2022-02-28	Institut f. med. Mikrobiologie & Hygiene - Österr. AGES GmbH	Institut f. med. Mikrobiologie & Hygiene - Österr. AGES GmbH	Kathrin Lippert et al
Austria/AGES-663559/2022	EPI_ISL_12317029	2022-02-28	Institut f. med. Mikrobiologie & Hygiene - Österr. AGES GmbH	Institut f. med. Mikrobiologie & Hygiene - Österr. AGES GmbH	Marion Blaschitz et al
Austria/AGES-663560/2022	EPI_ISL_12317030	2022-02-28	Institut f. med. Mikrobiologie & Hygiene - Österr. AGES GmbH	Institut f. med. Mikrobiologie & Hygiene - Österr. AGES GmbH	Sabrina Posselt et al
Austria/AGES-663561/2022	EPI_ISL_12317031	2022-02-28	Institut f. med. Mikrobiologie & Hygiene - Österr. AGES GmbH	Institut f. med. Mikrobiologie & Hygiene - Österr. AGES GmbH	Kathrin Lippert et al
Austria/AGES-663564/2022	EPI_ISL_12317034	2022-02-28	Institut f. med. Mikrobiologie & Hygiene - Österr. AGES GmbH	Institut f. med. Mikrobiologie & Hygiene - Österr. AGES GmbH	Kathrin Lippert et al
Austria/AGES-663565/2022	EPI_ISL_12317035	2022-02-28	Institut f. med. Mikrobiologie & Hygiene - Österr. AGES GmbH	Institut f. med. Mikrobiologie & Hygiene - Österr. AGES GmbH	Marion Blaschitz et al
Austria/AGES-663566/2022	EPI_ISL_12317036	2022-02-18	Institut f. med. Mikrobiologie & Hygiene - Österr. AGES GmbH	Institut f. med. Mikrobiologie & Hygiene - Österr. AGES GmbH	Sabrina Posselt et al
Austria/AGES-663568/2022	EPI_ISL_12317038	2022-02-28	Institut f. med. Mikrobiologie & Hygiene - Österr. AGES GmbH	Institut f. med. Mikrobiologie & Hygiene - Österr. AGES GmbH	Marion Blaschitz et al
Austria/AGES-663570/2022	EPI_ISL_12317040	2022-02-28	Institut f. med. Mikrobiologie & Hygiene - Österr. AGES GmbH	Institut f. med. Mikrobiologie & Hygiene - Österr. AGES GmbH	Kathrin Lippert et al
Austria/AGES-663572/2022	EPI_ISL_12317041	2022-02-28	Institut f. med. Mikrobiologie & Hygiene - Österr. AGES GmbH	Institut f. med. Mikrobiologie & Hygiene - Österr. AGES GmbH	Marion Blaschitz et al
Austria/AGES-663581/2022	EPI_ISL_12317046	2022-02-28	Institut f. med. Mikrobiologie & Hygiene - Österr. AGES GmbH	Institut f. med. Mikrobiologie & Hygiene - Österr. AGES GmbH	Kathrin Lippert et al
Austria/AGES-663582/2022	EPI_ISL_12317047	2022-02-28	Institut f. med. Mikrobiologie & Hygiene - Österr. AGES GmbH	Institut f. med. Mikrobiologie & Hygiene - Österr. AGES GmbH	Marion Blaschitz et al
Austria/AGES-663701/2022	EPI_ISL_12317053	2022-02-28	Institut f. med. Mikrobiologie & Hygiene - Österr. AGES GmbH	Institut f. med. Mikrobiologie & Hygiene - Österr. AGES GmbH	Marion Blaschitz et al
Austria/AGES-663711/2022	EPI_ISL_12317056	2022-02-21	Institut f. med. Mikrobiologie & Hygiene - Österr. AGES GmbH	Institut f. med. Mikrobiologie & Hygiene - Österr. AGES GmbH	Marion Blaschitz et al
Austria/AGES-663780/2022	EPI_ISL_12317058	2022-02-28	Institut f. med. Mikrobiologie & Hygiene - Österr. AGES GmbH	Institut f. med. Mikrobiologie & Hygiene - Österr. AGES GmbH	Kathrin Lippert et al
Austria/AGES-663799/2022	EPI_ISL_12317059	2022-02-28	Institut f. med. Mikrobiologie & Hygiene - Österr. AGES GmbH	Institut f. med. Mikrobiologie & Hygiene - Österr. AGES GmbH	Marion Blaschitz et al
Austria/AGES-663881/2022	EPI_ISL_12317065	2022-02-28	Institut f. med. Mikrobiologie & Hygiene - Österr. AGES GmbH	Institut f. med. Mikrobiologie & Hygiene - Österr. AGES GmbH	Marion Blaschitz et al
Austria/AGES-663905/2022	EPI_ISL_12317069	2022-02-28	Institut f. med. Mikrobiologie & Hygiene - Österr. AGES GmbH	Institut f. med. Mikrobiologie & Hygiene - Österr. AGES GmbH	Sabrina Posselt et al
Austria/AGES-663925/2022	EPI_ISL_12317071	2022-02-28	Institut f. med. Mikrobiologie & Hygiene - Österr. AGES GmbH	Institut f. med. Mikrobiologie & Hygiene - Österr. AGES GmbH	Marion Blaschitz et al
Austria/AGES-664559/2022	EPI_ISL_12317075	2022-02-28	Institut f. med. Mikrobiologie & Hygiene - Österr. AGES GmbH	Institut f. med. Mikrobiologie & Hygiene - Österr. AGES GmbH	Sabrina Posselt et al
Austria/AGES-664561/2022	EPI_ISL_12317076	2022-02-28	Institut f. med. Mikrobiologie & Hygiene - Österr. AGES GmbH	Institut f. med. Mikrobiologie & Hygiene - Österr. AGES GmbH	Kathrin Lippert et al
Austria/AGES-664563/2022	EPI_ISL_12317078	2022-02-28	Institut f. med. Mikrobiologie & Hygiene - Österr. AGES GmbH	Institut f. med. Mikrobiologie & Hygiene - Österr. AGES GmbH	Sabrina Posselt et al
Austria/AGES-664565/2022	EPI_ISL_12317079	2022-02-28	Institut f. med. Mikrobiologie & Hygiene - Österr. AGES GmbH	Institut f. med. Mikrobiologie & Hygiene - Österr. AGES GmbH	Kathrin Lippert et al
Austria/AGES-665553/2022	EPI_ISL_12317085	2022-02-28	Institut f. med. Mikrobiologie & Hygiene - Österr. AGES GmbH	Institut f. med. Mikrobiologie & Hygiene - Österr. AGES GmbH	Marion Blaschitz et al
Austria/AGES-665556/2022	EPI_ISL_12317087	2022-02-28	Institut f. med. Mikrobiologie & Hygiene - Österr. AGES GmbH	Institut f. med. Mikrobiologie & Hygiene - Österr. AGES GmbH	Kathrin Lippert et al
Austria/AGES-665557/2022	EPI_ISL_12317088	2022-02-28	Institut f. med. Mikrobiologie & Hygiene - Österr. AGES GmbH	Institut f. med. Mikrobiologie & Hygiene - Österr. AGES GmbH	Marion Blaschitz et al
Austria/AGES-665560/2022	EPI_ISL_12317090	2022-02-28	Institut f. med. Mikrobiologie & Hygiene - Österr. AGES GmbH	Institut f. med. Mikrobiologie & Hygiene - Österr. AGES GmbH	Kathrin Lippert et al
Austria/AGES-665562/2022	EPI_ISL_12317092	2022-02-28	Institut f. med. Mikrobiologie & Hygiene - Österr. AGES GmbH	Institut f. med. Mikrobiologie & Hygiene - Österr. AGES GmbH	Sabrina Posselt et al
Austria/AGES-665564/2022	EPI_ISL_12317093	2022-02-28	Institut f. med. Mikrobiologie & Hygiene - Österr. AGES GmbH	Institut f. med. Mikrobiologie & Hygiene - Österr. AGES GmbH	Kathrin Lippert et al
Austria/AGES-665576/2022	EPI_ISL_12317104	2022-02-23	Institut f. med. Mikrobiologie & Hygiene - Österr. AGES GmbH	Institut f. med. Mikrobiologie & Hygiene - Österr. AGES GmbH	Sabrina Posselt et al
Austria/AGES-676472/2022	EPI_ISL_12316972	2022-03-03	Institut f. med. Mikrobiologie & Hygiene - Österr. AGES GmbH	Institut f. med. Mikrobiologie & Hygiene - Österr. AGES GmbH	Sabrina Posselt et al
Austria/AGES-676474/2022	EPI_ISL_12316973	2022-03-03	Institut f. med. Mikrobiologie & Hygiene - Österr. AGES GmbH	Institut f. med. Mikrobiologie & Hygiene - Österr. AGES GmbH	Kathrin Lippert et al
Austria/AGES-676477/2022	EPI_ISL_12316974	2022-03-03	Institut f. med. Mikrobiologie & Hygiene - Österr. AGES GmbH	Institut f. med. Mikrobiologie & Hygiene - Österr. AGES GmbH	Marion Blaschitz et al
Austria/AGES-676478/2022	EPI_ISL_12316975	2022-03-03	Institut f. med. Mikrobiologie & Hygiene - Österr. AGES GmbH	Institut f. med. Mikrobiologie & Hygiene - Österr. AGES GmbH	Sabrina Posselt et al
Austria/AGES-676493/2022	EPI_ISL_12316979	2022-03-03	Institut f. med. Mikrobiologie & Hygiene - Österr. AGES GmbH	Institut f. med. Mikrobiologie & Hygiene - Österr. AGES GmbH	Kathrin Lippert et al
Austria/AGES-676496/2022	EPI_ISL_12316981	2022-03-03	Institut f. med. Mikrobiologie & Hygiene - Österr. AGES GmbH	Institut f. med. Mikrobiologie & Hygiene - Österr. AGES GmbH	Sabrina Posselt et al
Austria/AGES-676497/2022	EPI_ISL_12316982	2022-03-03	Institut f. med. Mikrobiologie & Hygiene - Österr. AGES GmbH	Institut f. med. Mikrobiologie & Hygiene - Österr. AGES GmbH	Kathrin Lippert et al
Austria/AGES-676543/2022	EPI_ISL_12316995	2022-03-03	Institut f. med. Mikrobiologie & Hygiene - Österr. AGES GmbH	Institut f. med. Mikrobiologie & Hygiene - Österr. AGES GmbH	Marion Blaschitz et al
Austria/AGES-676553/2022	EPI_ISL_12316998	2022-03-03	Institut f. med. Mikrobiologie & Hygiene - Österr. AGES GmbH	Institut f. med. Mikrobiologie & Hygiene - Österr. AGES GmbH	Marion Blaschitz et al
Austria/AGES-676580/2022	EPI_ISL_12317001	2022-03-03	Institut f. med. Mikrobiologie & Hygiene - Österr. AGES GmbH	Institut f. med. Mikrobiologie & Hygiene - Österr. AGES GmbH	Marion Blaschitz et al
Austria/AGES-676585/2022	EPI_ISL_12317004	2022-03-03	Institut f. med. Mikrobiologie & Hygiene - Österr. AGES GmbH	Institut f. med. Mikrobiologie & Hygiene - Österr. AGES GmbH	Marion Blaschitz et al
Austria/AGES-676613/2022	EPI_ISL_12317014	2022-03-03	Institut f. med. Mikrobiologie & Hygiene - Österr. AGES GmbH	Institut f. med. Mikrobiologie & Hygiene - Österr. AGES GmbH	Sabrina Posselt et al
Austria/AGES-677031/2022	EPI_ISL_12317022	2022-03-04	Institut f. med. Mikrobiologie & Hygiene - Österr. AGES GmbH	Institut f. med. Mikrobiologie & Hygiene - Österr. AGES GmbH	Marion Blaschitz et al
Austria/AGES-696595/2022	EPI_ISL_10258676	2022-01-01	AGES-Institute for medical Microbiology and Hygiene Vienna	AGES-Institute for medical Microbiology and Hygiene Vienna	Kathrin Lippert et al
Austria/CeMM21628/2021	EPI_ISL_9010995	2021-12-28	Austrian Agency for Health and Food Safety (AGES)	Bergthaler laboratory, CeMM Research Center for Molecular Medicine of the Austrian Academy of Sciences	Lukas Endler et al
Austria/CeMM21663/2021	EPI_ISL_9011026	2021-12-17	Austrian Agency for Health and Food Safety (AGES)	Bergthaler laboratory, CeMM Research Center for Molecular Medicine of the Austrian Academy of Sciences	Lukas Endler et al
Austria/CeMM21671/2021	EPI_ISL_9011032	2021-12-20	Austrian Agency for Health and Food Safety (AGES)	Bergthaler laboratory, CeMM Research Center for Molecular Medicine of the Austrian Academy of Sciences	Lukas Endler et al
Austria/CeMM21675/2021	EPI_ISL_9011035	2021-12-20	Austrian Agency for Health and Food Safety (AGES)	Bergthaler laboratory, CeMM Research Center for Molecular Medicine of the Austrian Academy of Sciences	Lukas Endler et al
Austria/CeMM21915/2022	EPI_ISL_9086695	2022-01-08	Austrian Agency for Health and Food Safety (AGES)	Bergthaler laboratory, CeMM Research Center for Molecular Medicine of the Austrian Academy of Sciences	Lukas Endler et al
Austria/CeMM21947/2022	EPI_ISL_9086722	2022-01-03	Austrian Agency for Health and Food Safety (AGES)	Bergthaler laboratory, CeMM Research Center for Molecular Medicine of the Austrian Academy of Sciences	Lukas Endler et al
Austria/CeMM21950/2022	EPI_ISL_9086725	2022-01-03	Austrian Agency for Health and Food Safety (AGES)	Bergthaler laboratory, CeMM Research Center for Molecular Medicine of the Austrian Academy of Sciences	Lukas Endler et al
[truncated: 584,570 more rows]
